# Supplementary material for: Randomized evaluation and cost-effectiveness of HIV and sexual and reproductive health service referral and linkage models in Zambia
Source: Springer Nature journal article supplement (doi:10.1186/s12889-016-3450-x), 2016-08-12
Supplement: MOESM2 [file 10581238]

Dataset: \*/REACH/Datasets/REACH\_StudyData\_Deidentified\_2015-10-28.dta  
Last saved: 28 Oct 2015 16:23

Label: [none]  
Number of variables: 931  
Number of observations: 4,168  
Size: 13,275,080 bytes ignoring labels, etc.

\_dta:

1. This data file was generated from REACH\_ClientData\_2015-10-28 and REACH\_SurveyData\_Merged\_2015-10-28 on 2015-10-28. The data were generated from REACH\_8\_ClientSurvey\_Merge.do.

-----  
sidsid  
-----

type: string (str9)  
unique values: 4168 missing "": 0/4168  
examples: "02-0303"  
"06-0019"  
"07-0310"  
"11-0197"

-----  
armIDStudy Arm  
-----

type: numeric (byte)  
label: armID  
range: [1,3] units: 1  
unique values: 3 missing .: 0/4168  
unique mv codes: 1 missing .\*: 205/4168  
tabulation: Freq. Numeric Label  
1319 1 1. Standard of Care  
1323 2 2. Comprehensive Referrals with  
Follow-Up  
1321 3 3. Integrated Services Model  
205 .j .j. Ineligible: External site  
client

-----  
siteIDRegistration Site  
-----

type: numeric (byte)  
label: site  
range: [1,13] units: 1  
unique values: 9 missing .: 0/4168  
unique mv codes: 1 missing .\*: 205/4168  
tabulation: Freq. Numeric Label  
557 1 1. SFH HCT - Cairo Road  
489 2 2. Chawama Clinic - MCH  
245 3 3. Chawama Clinic - Out Patient  
Ward (VMMC)  
362 5 5. Kamwala Clinic - TB, STI &  
HIV Clinic  
545 6 6. Kapata Urban Clinic, MCH  
775 7 7. Kapata Urban Clinic, TB, STI  
& HIV  
189 8 8. Chipata Gen Hosp - OP VMMC  
713 11 11. SFH New Start  
88 13 13. SFH VMMC  
205 .j .j. Ineligible: External site

client

-----  
 SiteProv Registration Site Province  
 -----

type: numeric (byte)  
 label: province

range: [3,5] units: 1  
 unique values: 2 missing .: 0/4168  
 unique mv codes: 1 missing .\*: 205/4168

| tabulation: | Freq. | Numeric | Label                                |
|-------------|-------|---------|--------------------------------------|
|             | 2310  | 3       | 3. EASTERN                           |
|             | 1653  | 5       | 5. LUSAKA                            |
|             | 205   | .j      | .j. Ineligible: External site client |

-----  
 Gender Gender  
 -----

type: numeric (byte)  
 label: Gender

range: [0,1] units: 1  
 unique values: 2 missing .: 0/4168

| tabulation: | Freq. | Numeric | Label     |
|-------------|-------|---------|-----------|
|             | 2033  | 0       | 0. Male   |
|             | 2135  | 1       | 1. Female |

-----  
 MedRecordType Medical Record Type  
 -----

type: numeric (byte)  
 label: MedRecordType

range: [0,1] units: 1  
 unique values: 2 missing .: 2/4168  
 unique mv codes: 2 missing .\*: 205/4168

| tabulation: | Freq. | Numeric | Label                                |
|-------------|-------|---------|--------------------------------------|
|             | 2603  | 0       | 0. GOV                               |
|             | 1358  | 1       | 1. SFH                               |
|             | 2     | .       | .                                    |
|             | 205   | .j      | .j. Ineligible: External site client |

-----  
 RegDate\_sys System Registration Date  
 -----

type: numeric (double)

range: [1.703e+12,1.731e+12] units: 1000  
 unique values: 3959 missing .: 3/4168  
 unique mv codes: 2 missing .\*: 205/4168

mean: 1.7e+12  
 std. dev: 6.5e+09

| percentiles: | 10%     | 25%     | 50%     | 75%     | 90%     |
|--------------|---------|---------|---------|---------|---------|
|              | 1.7e+12 | 1.7e+12 | 1.7e+12 | 1.7e+12 | 1.7e+12 |

-----  
 RegDate Registration Date  
 -----

```

type: numeric daily date (int)

range: [19709,20037]          units: 1
or equivalently: [17dec2013,10nov2014]  units: days
unique values: 242           missing .: 0/4168
unique mv codes: 1           missing .*: 205/4168

mean: 19866.5 = 23may2014 (+ 12 hours)
std. dev: 75.2411

percentiles:      10%      25%      50%      75%      90%
                  19771   19807   19862   19922   19974
                  17feb2014 25mar2014 19may2014 18jul2014 08sep2014

```

-----  
RegTime Registration Time  
-----

```

type: string (str5)

unique values: 463           missing "": 206/4168

examples: "09-42"
           "10-33"
           "11-27"
           "12-37"

```

-----  
Province Province of residence  
-----

```

type: numeric (byte)
label: province

range: [3,10]          units: 1
unique values: 6       missing .: 0/4168
unique mv codes: 1     missing .*: 205/4168

tabulation: Freq.  Numeric  Label
             2305      3      3. EASTERN
             1646      5      5. LUSAKA
               6       6      6. LUAPULA
               2       8      8. MACHINGA
               3       9      9. CENTRAL
               1      10     10. COPPERBELT
             205      .j     .j. Ineligible: External site
                    client

```

-----  
District District of residence  
-----

```

type: numeric (byte)
label: district

range: [1,9]          units: 1
unique values: 8       missing .: 0/4168
unique mv codes: 1     missing .*: 205/4168

tabulation: Freq.  Numeric  Label
             1       1      1. CHADIZA
             5       2      2. CHAMA
            2303      3      3. CHIPATA
             1       4      4. CHONGWE
             1       5      5. KAFUE
             1       7      7. LUANGWA
             6       8      8. LUNDAZI
            1645      9      9. LUSAKA
             205      .j     .j. Ineligible: External site

```

client

-----  
ConsentCompleted

Consent Completed  
-----

type: numeric (byte)  
label: yesno

range: [1,1] units: 1  
unique values: 1 missing .: 0/4168  
unique mv codes: 1 missing .\*: 205/4168

| tabulation: | Freq. | Numeric | Label                                   |
|-------------|-------|---------|-----------------------------------------|
|             | 3963  | 1       | 1. Yes                                  |
|             | 205   | .j      | .j. Ineligible: External site<br>client |

-----  
BaseLineIntrCompleted

Baseline Interview Completed  
-----

type: numeric (byte)  
label: yesno

range: [0,1] units: 1  
unique values: 2 missing .: 0/4168  
unique mv codes: 1 missing .\*: 205/4168

| tabulation: | Freq. | Numeric | Label                                   |
|-------------|-------|---------|-----------------------------------------|
|             | 5     | 0       | 0. No                                   |
|             | 3958  | 1       | 1. Yes                                  |
|             | 205   | .j      | .j. Ineligible: External site<br>client |

-----  
Notes

Notes  
-----

type: string (str244)

unique values: 178 missing "": 3936/4168

examples: ""  
""  
""  
""

warning: variable has leading, embedded, and trailing blanks

-----  
Assigned

Assigned to Study Arm  
-----

type: numeric (byte)  
label: yesno

range: [0,1] units: 1  
unique values: 2 missing .: 0/4168  
unique mv codes: 1 missing .\*: 205/4168

| tabulation: | Freq. | Numeric | Label                                   |
|-------------|-------|---------|-----------------------------------------|
|             | 1     | 0       | 0. No                                   |
|             | 3962  | 1       | 1. Yes                                  |
|             | 205   | .j      | .j. Ineligible: External site<br>client |

-----  
AssignedDate\_sys

System Randomization Date  
-----

```

type: numeric (double)

range: [1.703e+12,1.731e+12]      units: 1000
unique values: 3959                missing .: 3/4168
unique mv codes: 2                  missing .*: 205/4168

mean: 1.7e+12
std. dev: 6.5e+09

percentiles:      10%      25%      50%      75%      90%
                  1.7e+12  1.7e+12  1.7e+12  1.7e+12  1.7e+12

```

-----  
OtherPeople # Accompanying People Registered  
-----

```

type: numeric (byte)

range: [0,1]      units: 1
unique values: 2  missing .: 0/4168
unique mv codes: 1 missing .*: 205/4168

tabulation: Freq. Value
              3947  0
              16   1
              205  .j

```

-----  
personID1 ID of Person Accompanying Client  
-----

```

type: numeric (long)

range: [1020,85004]      units: 1
unique values: 16        missing .: 3947/4168
unique mv codes: 2        missing .*: 205/4168

tabulation: Freq. Value
              1  1020
              1  53008
              1  61001
              1  61002
              1  61003
              1  61004
              1  62001
              1  62002
              1  62003
              1  64001
              1  73001
              1  73002
              1  85001
              1  85002
              1  85003
              1  85004
              3947 .
              205 .j

```

-----  
PersonGender1 Gender of Person Accompanying Client  
-----

```

type: numeric (byte)
label: Gender

range: [0,1]      units: 1
unique values: 2  missing .: 3947/4168
unique mv codes: 2 missing .*: 205/4168

tabulation: Freq. Numeric Label

```

```

      7      0 0. Male
      9      1 1. Female
3947      .
205      .j .j. Ineligible: External site
                    client

```

PersHaveNRC1

Person Accompanying Client has NRC

```

type: numeric (byte)
label: yesno

range: [0,1]          units: 1
unique values: 2      missing .: 3947/4168
unique mv codes: 2    missing .*: 205/4168

tabulation: Freq.   Numeric  Label
            13      0      0. No
             3      1      1. Yes
            3947    .
            205    .j     .j. Ineligible: External site
                    client

```

PersRealshipl

Client's Relationship to Person Accompanying

```

type: numeric (byte)
label: relation

range: [1,12]        units: 1
unique values: 3      missing .: 3947/4168
unique mv codes: 2    missing .*: 205/4168

tabulation: Freq.   Numeric  Label
            13      1      1. SPOUSE
             1      3      3. DAUGHTER
             2     12     12. OTHER NON-RELATIVE
            3947    .
            205    .j     .j. Ineligible: External site
                    client

```

Reg1\_ID

Registration 1 ID

```

type: numeric (float)

range: [265,86024]   units: 1
unique values: 3963  missing .: 0/4168
unique mv codes: 1   missing .*: 205/4168

mean: 55653.2
std. dev: 16198.1

percentiles:      10%      25%      50%      75%      90%
                  44367   47666   56042   67121   75012

```

Reg1\_PersID

Registration 1: Respondent or Person Accompanying

```

type: numeric (byte)
label: RegPersID

range: [0,0]          units: 1
unique values: 1      missing .: 0/4168
unique mv codes: 1    missing .*: 205/4168

```

```

tabulation: Freq.  Numeric  Label
              3963      0  0. Respondent
              205      .j  .j. Ineligible: External site
                               client

```

```

-----
Reg1_Counseling                                Registration 1: Counseling Received
-----

```

```

      type: numeric (byte)
      label: Counseling

      range: [1,4]                units: 1
unique values: 4                  missing .: 107/4168
unique mv codes: 2                missing .*: 205/4168

```

```

tabulation: Freq.  Numeric  Label
              118      1  1. GROUP
              3728     2  2. ONE-ON-ONE
               4       3  3. BOTH
               6       4  4. NONE
              107      .
              205      .j  .j. Ineligible: External site
                               client

```

```

-----
Reg1_Escort                                    Registration 1: Escort Provided
-----

```

```

      type: numeric (byte)
      label: Reg1_Escort

      range: [0,1]                units: 1
unique values: 2                  missing .: 0/4168
unique mv codes: 3                missing .*: 3184/4168

```

```

tabulation: Freq.  Numeric  Label
              290      0  0. No
              694      1  1. Yes
             2642     .a  .a. Not in integrated arm
              337     .b  .b. Integrated arm, no referrals
              205     .j  .j. Ineligible: External site
                               client

```

```

-----
Reg1_EscortTime                               Registration 1: Time of Escort
-----

```

```

      type: string (str5)

unique values: 318                missing "": 3474/4168

examples: ""
          ""
          ""
          ""

```

```

-----
Reg1_ServCameFor1                             Registration 1: Service 1 Came For
-----

```

```

      type: numeric (int)
      label: Service

      range: [3,1000]            units: 1
unique values: 10                missing .: 0/4168
unique mv codes: 1                missing .*: 205/4168

```

```

tabulation: Freq.  Numeric  Label
              4       3  3. FP: INDIVIDUAL COUNSELING

```

|      |      |                                      |
|------|------|--------------------------------------|
| 1028 | 4    | 4. FP: LONG TERM METHODS PROVIDED    |
| 3    | 5    | 5. FP: SHORT TERM METHODS PROVIDED   |
| 21   | 6    | 6. HIV: HTC - COUPLES                |
| 2378 | 7    | 7. HIV: HTC - INDIVIDUAL             |
| 1    | 8    | 8. HIV: ARV PROVISION                |
| 1    | 9    | 9. HIV: CD4 TESTING                  |
| 1    | 14   | 14. VMMC: COUNSELING ONLY            |
| 520  | 15   | 15. VMMC: PROCEDURE                  |
| 6    | 1000 | 1000. NO ADDITIONAL SERVICE          |
| 205  | .j   | .j. Ineligible: External site client |

-----  
 Reg1\_ServRecv1

Registration 1: Service 1 Received  
 -----

```

  type: numeric (int)
  label: Service

  range: [3,1000]          units: 1
  unique values: 10       missing .: 105/4168
  unique mv codes: 2      missing .*: 205/4168

```

| tabulation: | Freq. | Numeric | Label                                |
|-------------|-------|---------|--------------------------------------|
|             | 4     | 3       | 3. FP: INDIVIDUAL COUNSELING         |
|             | 998   | 4       | 4. FP: LONG TERM METHODS PROVIDED    |
|             | 4     | 5       | 5. FP: SHORT TERM METHODS PROVIDED   |
|             | 30    | 6       | 6. HIV: HTC - COUPLES                |
|             | 2317  | 7       | 7. HIV: HTC - INDIVIDUAL             |
|             | 2     | 8       | 8. HIV: ARV PROVISION                |
|             | 1     | 9       | 9. HIV: CD4 TESTING                  |
|             | 19    | 14      | 14. VMMC: COUNSELING ONLY            |
|             | 474   | 15      | 15. VMMC: PROCEDURE                  |
|             | 9     | 1000    | 1000. NO ADDITIONAL SERVICE          |
|             | 105   | .       | .                                    |
|             | 205   | .j      | .j. Ineligible: External site client |

-----  
 Reg1\_DateServRecv1

Registration 1: Date Service 1 Received  
 -----

```

  type: numeric daily date (int)

  range: [19709,20037]      units: 1
  or equivalently: [17dec2013,10nov2014]  units: days
  unique values: 241       missing .: 105/4168
  unique mv codes: 2       missing .*: 205/4168

  mean: 19865.2 = 22may2014 (+ 5 hours)
  std. dev: 74.7905

  percentiles:      10%      25%      50%      75%      90%
                   19771    19806    19862    19921    19970
                   17feb2014 24mar2014 19may2014 17jul2014 04sep2014

```

-----  
 Reg1\_ServDate1\_sys

Registration 1: System Date Service 1 Received  
 -----

```

  type: numeric (float)

  range: [1.703e+12,1.731e+12]  units: 100000
  unique values: 3734          missing .: 1/4168
  unique mv codes: 2          missing .*: 205/4168

```



mean: 1.7e+12  
 std. dev: 6.5e+09  
 percentiles: 10% 25% 50% 75% 90%  
 1.7e+12 1.7e+12 1.7e+12 1.7e+12 1.7e+12

-----  
 Reg1\_ServCameFor2 Registration 1: Service 2 Came For  
 -----

type: numeric (int)  
 label: Service  
 range: [11,1000] units: 1  
 unique values: 3 missing .: 0/4168  
 unique mv codes: 1 missing .\*: 205/4168

| tabulation: | Freq. | Numeric | Label                                |
|-------------|-------|---------|--------------------------------------|
|             | 1     | 11      | 11. HIV: TB TESTING                  |
|             | 2     | 13      | 13. STI: TREATMENT                   |
|             | 3960  | 1000    | 1000. NO ADDITIONAL SERVICE          |
|             | 205   | .j      | .j. Ineligible: External site client |

-----  
 Reg1\_ServRecv2 Registration 1: Service 2 Received  
 -----

type: numeric (int)  
 label: Service  
 range: [5,1000] units: 1  
 unique values: 6 missing .: 106/4168  
 unique mv codes: 2 missing .\*: 205/4168

| tabulation: | Freq. | Numeric | Label                                |
|-------------|-------|---------|--------------------------------------|
|             | 1     | 5       | 5. FP: SHORT TERM METHODS PROVIDED   |
|             | 1     | 11      | 11. HIV: TB TESTING                  |
|             | 17    | 12      | 12. STI: ASSESSMENT                  |
|             | 2     | 13      | 13. STI: TREATMENT                   |
|             | 1     | 14      | 14. VMMC: COUNSELING ONLY            |
|             | 3835  | 1000    | 1000. NO ADDITIONAL SERVICE          |
|             | 106   | .       | .                                    |
|             | 205   | .j      | .j. Ineligible: External site client |

-----  
 Reg1\_DateServRecv2 Registration 1: Date Service 2 Received  
 -----

type: numeric daily date (int)  
 range: [19709,20037] units: 1  
 or equivalently: [17dec2013,10nov2014] units: days  
 unique values: 241 missing .: 106/4168  
 unique mv codes: 2 missing .\*: 205/4168  
 mean: 19865.2 = 22may2014 (+ 6 hours)  
 std. dev: 74.7751  
 percentiles: 10% 25% 50% 75% 90%  
 19771 19806 19862 19921 19970  
 17feb2014 24mar2014 19may2014 17jul2014 04sep2014

-----  
 Reg1\_ServDate2\_sys Registration 1: System Date Service 2 Received  
 -----

type: numeric (float)

range: [1.703e+12,1.731e+12] units: 100000  
 unique values: 3736 missing .: 1/4168  
 unique mv codes: 2 missing .\*: 205/4168  
  
 mean: 1.7e+12  
 std. dev: 6.5e+09  
  
 percentiles: 10% 25% 50% 75% 90%  
 1.7e+12 1.7e+12 1.7e+12 1.7e+12 1.7e+12

-----  
 Reg1\_ServCameFor3 Registration 1: Service 3 Came For  
 -----

type: numeric (int)  
 label: Service  
  
 range: [5,1000] units: 1  
 unique values: 3 missing .: 0/4168  
 unique mv codes: 1 missing .\*: 205/4168

| tabulation: | Freq. | Numeric | Label                                |
|-------------|-------|---------|--------------------------------------|
|             | 1     | 5       | 5. FP: SHORT TERM METHODS PROVIDED   |
|             | 2     | 14      | 14. VMMC: COUNSELING ONLY            |
|             | 3960  | 1000    | 1000. NO ADDITIONAL SERVICE          |
|             | 205   | .j      | .j. Ineligible: External site client |

-----  
 Reg1\_ServRecv3 Registration 1: Service 3 Received  
 -----

type: numeric (int)  
 label: Service  
  
 range: [5,1000] units: 1  
 unique values: 2 missing .: 106/4168  
 unique mv codes: 2 missing .\*: 205/4168

| tabulation: | Freq. | Numeric | Label                                |
|-------------|-------|---------|--------------------------------------|
|             | 1     | 5       | 5. FP: SHORT TERM METHODS PROVIDED   |
|             | 3856  | 1000    | 1000. NO ADDITIONAL SERVICE          |
|             | 106   | .       |                                      |
|             | 205   | .j      | .j. Ineligible: External site client |

-----  
 Reg1\_DateServRecv3 Registration 1: Date Service 3 Received  
 -----

type: numeric daily date (int)  
  
 range: [19709,20037] units: 1  
 or equivalently: [17dec2013,10nov2014] units: days  
 unique values: 241 missing .: 106/4168  
 unique mv codes: 2 missing .\*: 205/4168  
  
 mean: 19865.2 = 22may2014 (+ 6 hours)  
 std. dev: 74.7751  
  
 percentiles: 10% 25% 50% 75% 90%  
 19771 19806 19862 19921 19970  
 17feb2014 24mar2014 19may2014 17jul2014 04sep2014

-----  
 Reg1\_ServDate3\_sys Registration 1: System Date Service 3 Received  
 -----

```

type: numeric (float)

range: [1.703e+12,1.731e+12]      units: 100000
unique values: 3739                missing .: 1/4168
unique mv codes: 2                  missing .*: 205/4168

mean: 1.7e+12
std. dev: 6.5e+09

percentiles:      10%      25%      50%      75%      90%
                  1.7e+12  1.7e+12  1.7e+12  1.7e+12  1.7e+12

```

-----  
Reg1\_ServCameFor4

Registration 1: Service 4 Came For  
-----

```

type: numeric (int)
label: Service

range: [13,1000]      units: 1
unique values: 3      missing .: 0/4168
unique mv codes: 1    missing .*: 205/4168

tabulation: Freq.  Numeric  Label
             1         13  13. STI: TREATMENT
             3         14  14. VMMC: COUNSELING ONLY
            3959       1000 1000. NO ADDITIONAL SERVICE
             205         .j  .j. Ineligible: External site
                           client

```

-----  
Reg1\_ServRecv4

Registration 1: Service 4 Received  
-----

```

type: numeric (int)
label: Service

range: [5,1000]      units: 1
unique values: 3      missing .: 106/4168
unique mv codes: 2    missing .*: 205/4168

tabulation: Freq.  Numeric  Label
             1         5   5. FP: SHORT TERM METHODS
                           PROVIDED
             3         14  14. VMMC: COUNSELING ONLY
            3853       1000 1000. NO ADDITIONAL SERVICE
             106         .
             205         .j  .j. Ineligible: External site
                           client

```

-----  
Reg1\_DateServRecv4

Registration 1: Date Service 4 Received  
-----

```

type: numeric daily date (int)

range: [19709,20037]      units: 1
or equivalently: [17dec2013,10nov2014]  units: days
unique values: 241        missing .: 106/4168
unique mv codes: 2        missing .*: 205/4168

mean: 19865.2 = 22may2014 (+ 6 hours)
std. dev: 74.7751

percentiles:      10%      25%      50%      75%      90%
                  19771    19806    19862    19921    19970
                  17feb2014 24mar2014 19may2014 17jul2014 04sep2014

```

-----

Reg1\_ServDate4\_sys

Registration 1: System Date Service 4 Received

```

-----
type: numeric (float)
range: [1.703e+12,1.731e+12] units: 100000
unique values: 3739 missing .: 1/4168
unique mv codes: 2 missing .*: 205/4168

mean: 1.7e+12
std. dev: 6.5e+09

percentiles: 10% 25% 50% 75% 90%
              1.7e+12 1.7e+12 1.7e+12 1.7e+12 1.7e+12
-----

```

Reg1\_ServCameFor5

Registration 1: Service 5 Came For

```

-----
type: numeric (int)
label: Service

range: [5,1000] units: 1
unique values: 3 missing .: 1291/4168
unique mv codes: 2 missing .*: 205/4168

tabulation: Freq. Numeric Label
              1          5 5. FP: SHORT TERM METHODS
              1          13 PROVIDED
              2670         1000 13. STI: TREATMENT
              1291          . 1000. NO ADDITIONAL SERVICE
              205          .j .j. Ineligible: External site
              client
-----

```

Reg1\_ServRecv5

Registration 1: Service 5 Received

```

-----
type: numeric (int)
label: Service

range: [5,1000] units: 1
unique values: 3 missing .: 1370/4168
unique mv codes: 2 missing .*: 205/4168

tabulation: Freq. Numeric Label
              1          5 5. FP: SHORT TERM METHODS
              2          13 PROVIDED
              2590         1000 13. STI: TREATMENT
              1370          . 1000. NO ADDITIONAL SERVICE
              205          .j .j. Ineligible: External site
              client
-----

```

Reg1\_DateServRecv5

Registration 1: Date Service 5 Received

```

-----
type: numeric daily date (int)

range: [19709,20037] units: 1
or equivalently: [17dec2013,10nov2014] units: days
unique values: 214 missing .: 1369/4168
unique mv codes: 2 missing .*: 205/4168

mean: 19879.5 = 05jun2014 (+ 11 hours)
std. dev: 75.3854

percentiles: 10% 25% 50% 75% 90%
-----

```

19775 19823 19878 19935 19981  
21feb2014 10apr2014 04jun2014 31jul2014 15sep2014

-----  
Reg1\_ServDate5\_sys Registration 1: System Date Service 5 Received  
-----

type: numeric (float)  
range: [1.703e+12,1.731e+12] units: 100000  
unique values: 2571 missing .: 1291/4168  
unique mv codes: 2 missing .\*: 205/4168  
mean: 1.7e+12  
std. dev: 6.5e+09  
percentiles: 10% 25% 50% 75% 90%  
1.7e+12 1.7e+12 1.7e+12 1.7e+12 1.7e+12

-----  
Reg2\_ID Registration 2 ID  
-----

type: numeric (float)  
range: [597,67184] units: 1  
unique values: 16 missing .: 3947/4168  
unique mv codes: 2 missing .\*: 205/4168

tabulation: Freq. Value  
1 597  
1 47106  
1 55214  
1 55237  
1 55274  
1 55276  
1 56358  
1 56622  
1 56775  
1 58009  
1 66336  
1 66475  
1 67015  
1 67150  
1 67181  
1 67184  
3947 .  
205 .j

-----  
Reg2\_PersID Registration 2: Respondent or Person Accompanying  
-----

type: numeric (float)  
label: RegPersID, but 16 nonmissing values are not labeled  
range: [1020,85004] units: 1  
unique values: 16 missing .: 3947/4168  
unique mv codes: 2 missing .\*: 205/4168

tabulation: Freq. Numeric Label  
1 1020  
1 53008  
1 61001  
1 61002  
1 61003  
1 61004  
1 62001  
1 62002  
1 62003

```

1      64001
1      73001
1      73002
1      85001
1      85002
1      85003
1      85004
3947   .
205    .j .j. Ineligible: External site
        client

```

```

-----
Reg2_Counseling                                Registration 2: Counseling Received
-----

```

```

type: numeric (byte)
label: Counseling

range: [1,3]                                units: 1
unique values: 3                            missing .: 3949/4168
unique mv codes: 2                          missing .*: 205/4168

tabulation: Freq.  Numeric  Label
              1          1  1. GROUP
              12         2  2. ONE-ON-ONE
              1          3  3. BOTH
3949         .
205         .j .j. Ineligible: External site
              client

```

```

-----
Reg2_Escort                                    Registration 2: Escort Provided
-----

```

```

type: numeric (byte)
label: Reg2_Escort

range: [.,.]                                units: .
unique values: 0                            missing .: 0/4168
unique mv codes: 4                          missing .*: 4168/4168

tabulation: Freq.  Numeric  Label
              2642     .a   .a. Not in integrated arm
              7        .b   .b. Integrated arm, no referrals
              1314     .c   .c. Integrated arm, no one
                           accompanied at registration
              205     .j   .j. Ineligible: External site
                           client

```

```

-----
Reg2_EscortTime                                Registration 2: Time of Escort
-----

```

```

type: string (str1), but longest is str0

unique values: 0                            missing "": 4168/4168

tabulation: Freq.  Value
              4168  ""

```

```

-----
Reg2_ServCameFor1                              Registration 2: Service 1 Came For
-----

```

```

type: numeric (int)
label: Service

range: [2,1000]                              units: 1
unique values: 5                            missing .: 3947/4168
unique mv codes: 2                          missing .*: 205/4168

```

```

tabulation: Freq.  Numeric  Label
             2          2    2. FP: GROUP COUNSELING
             10         6    6. HIV: HTC - COUPLES
             1          7    7. HIV: HTC - INDIVIDUAL
             1          8    8. HIV: ARV PROVISION
             2         1000  1000. NO ADDITIONAL SERVICE
             3947         .
             205         .j  .j. Ineligible: External site
                               client

```

-----  
Reg2\_ServRecv1

Registration 2: Service 1 Received  
-----

```

type: numeric (byte)
label: Service

range: [2,8]                units: 1
unique values: 5            missing .: 3949/4168
unique mv codes: 2         missing .*: 205/4168

```

```

tabulation: Freq.  Numeric  Label
             1          2    2. FP: GROUP COUNSELING
             1          3    3. FP: INDIVIDUAL COUNSELING
             10         6    6. HIV: HTC - COUPLES
             1          7    7. HIV: HTC - INDIVIDUAL
             1          8    8. HIV: ARV PROVISION
             3949         .
             205         .j  .j. Ineligible: External site
                               client

```

-----  
Reg2\_DateServRecv1

Registration 2: Date Service 1 Received  
-----

```

type: numeric daily date (int)

range: [19747,19989]        units: 1
or equivalently: [24jan2014,23sep2014]  units: days
unique values: 12          missing .: 3949/4168
unique mv codes: 2         missing .*: 205/4168

```

```

tabulation: Freq.  Value
             1  19747  24jan2014
             1  19799  17mar2014
             1  19808  26mar2014
             1  19813  31mar2014
             2  19823  10apr2014
             2  19830  17apr2014
             1  19837  24apr2014
             1  19855  12may2014
             1  19880  06jun2014
             1  19892  18jun2014
             1  19936  01aug2014
             1  19989  23sep2014
             3949  .
             205  .j

```

-----  
Reg2\_ServDate1\_sys

Registration 2: System Date Service 1 Received  
-----

```

type: numeric (float)

range: [1.706e+12,1.727e+12]  units: 100000
unique values: 16            missing .: 3947/4168
unique mv codes: 2         missing .*: 205/4168

```

```

tabulation: Freq.  Value

```

```

1 1.706e+12
1 1.711e+12
1 1.711e+12
1 1.712e+12
1 1.712e+12
1 1.713e+12
1 1.713e+12
1 1.713e+12
1 1.713e+12
1 1.715e+12
1 1.716e+12
1 1.718e+12
1 1.719e+12
1 1.719e+12
1 1.723e+12
1 1.727e+12
3947 .
205 .j

```

-----  
Reg2\_ServCameFor2

Registration 2: Service 2 Came For  
-----

```

type: numeric (int)
label: Service

range: [1000,1000]          units: 1
unique values: 1           missing .: 3947/4168
unique mv codes: 2         missing .*: 205/4168

tabulation: Freq.  Numeric  Label
             16      1000  1000. NO ADDITIONAL SERVICE
             3947      .
             205      .j   .j. Ineligible: External site
                               client

```

-----  
Reg2\_ServRecv2

Registration 2: Service 2 Received  
-----

```

type: numeric (int)
label: Service

range: [1000,1000]          units: 1
unique values: 1           missing .: 3949/4168
unique mv codes: 2         missing .*: 205/4168

tabulation: Freq.  Numeric  Label
             14      1000  1000. NO ADDITIONAL SERVICE
             3949      .
             205      .j   .j. Ineligible: External site
                               client

```

-----  
Reg2\_DateServRecv2

Registration 2: Date Service 2 Received  
-----

```

type: numeric daily date (int)

range: [19747,19989]        units: 1
or equivalently: [24jan2014,23sep2014]  units: days
unique values: 12          missing .: 3949/4168
unique mv codes: 2         missing .*: 205/4168

tabulation: Freq.  Value
             1  19747  24jan2014
             1  19799  17mar2014
             1  19808  26mar2014
             1  19813  31mar2014
             2  19823  10apr2014

```



```

2 19830 17apr2014
1 19837 24apr2014
1 19855 12may2014
1 19880 06jun2014
1 19892 18jun2014
1 19936 01aug2014
1 19989 23sep2014
3949 .
205 .j

```

-----  
Reg2\_ServDate2\_sys Registration 2: System Date Service 2 Received  
-----

```

type: numeric (float)
range: [1.706e+12,1.727e+12] units: 100000
unique values: 16 missing .: 3947/4168
unique mv codes: 2 missing .*: 205/4168

```

```

tabulation: Freq. Value
1 1.706e+12
1 1.711e+12
1 1.711e+12
1 1.712e+12
1 1.712e+12
1 1.713e+12
1 1.713e+12
1 1.713e+12
1 1.713e+12
1 1.715e+12
1 1.716e+12
1 1.718e+12
1 1.719e+12
1 1.719e+12
1 1.723e+12
1 1.727e+12
3947 .
205 .j

```

-----  
Reg2\_ServCameFor3 Registration 2: Service 3 Came For  
-----

```

type: numeric (int)
label: Service
range: [1000,1000] units: 1
unique values: 1 missing .: 3947/4168
unique mv codes: 2 missing .*: 205/4168

```

```

tabulation: Freq. Numeric Label
16 1000 1000. NO ADDITIONAL SERVICE
3947 .
205 .j .j. Ineligible: External site
client

```

-----  
Reg2\_ServRecv3 Registration 2: Service 3 Received  
-----

```

type: numeric (int)
label: Service
range: [1000,1000] units: 1
unique values: 1 missing .: 3949/4168
unique mv codes: 2 missing .*: 205/4168

```

```

tabulation: Freq. Numeric Label
14 1000 1000. NO ADDITIONAL SERVICE

```

3949 .  
205 .j .j. Ineligible: External site  
client

-----  
Reg2\_DateServRecv3 Registration 2: Date Service 3 Received  
-----

type: numeric daily date (int)  
range: [19747,19989] units: 1  
or equivalently: [24jan2014,23sep2014] units: days  
unique values: 12 missing .: 3949/4168  
unique mv codes: 2 missing .\*: 205/4168

tabulation: Freq. Value  
1 19747 24jan2014  
1 19799 17mar2014  
1 19808 26mar2014  
1 19813 31mar2014  
2 19823 10apr2014  
2 19830 17apr2014  
1 19837 24apr2014  
1 19855 12may2014  
1 19880 06jun2014  
1 19892 18jun2014  
1 19936 01aug2014  
1 19989 23sep2014  
3949 . .  
205 .j .j

-----  
Reg2\_ServDate3\_sys Registration 2: System Date Service 3 Received  
-----

type: numeric (float)  
range: [1.706e+12,1.727e+12] units: 100000  
unique values: 16 missing .: 3947/4168  
unique mv codes: 2 missing .\*: 205/4168

tabulation: Freq. Value  
1 1.706e+12  
1 1.711e+12  
1 1.711e+12  
1 1.712e+12  
1 1.712e+12  
1 1.713e+12  
1 1.713e+12  
1 1.713e+12  
1 1.713e+12  
1 1.715e+12  
1 1.716e+12  
1 1.718e+12  
1 1.719e+12  
1 1.719e+12  
1 1.723e+12  
1 1.727e+12  
3947 . .  
205 .j

-----  
Reg2\_ServCameFor4 Registration 2: Service 4 Came For  
-----

type: numeric (int)  
label: Service  
range: [1000,1000] units: 1  
unique values: 1 missing .: 3947/4168

unique mv codes: 2 missing .\*: 205/4168

| tabulation: | Freq. | Numeric | Label                                |
|-------------|-------|---------|--------------------------------------|
|             | 16    | 1000    | 1000. NO ADDITIONAL SERVICE          |
|             | 3947  | .       | .                                    |
|             | 205   | .j      | .j. Ineligible: External site client |

-----  
Reg2\_ServRecv4

Registration 2: Service 4 Received  
-----

type: numeric (int)  
label: Service

range: [1000,1000] units: 1  
unique values: 1 missing .: 3949/4168  
unique mv codes: 2 missing .\*: 205/4168

| tabulation: | Freq. | Numeric | Label                                |
|-------------|-------|---------|--------------------------------------|
|             | 14    | 1000    | 1000. NO ADDITIONAL SERVICE          |
|             | 3949  | .       | .                                    |
|             | 205   | .j      | .j. Ineligible: External site client |

-----  
Reg2\_DateServRecv4

Registration 2: Date Service 4 Received  
-----

type: numeric daily date (int)

range: [19747,19989] units: 1  
or equivalently: [24jan2014,23sep2014] units: days  
unique values: 12 missing .: 3949/4168  
unique mv codes: 2 missing .\*: 205/4168

| tabulation: | Freq. | Value           |
|-------------|-------|-----------------|
|             | 1     | 19747 24jan2014 |
|             | 1     | 19799 17mar2014 |
|             | 1     | 19808 26mar2014 |
|             | 1     | 19813 31mar2014 |
|             | 2     | 19823 10apr2014 |
|             | 2     | 19830 17apr2014 |
|             | 1     | 19837 24apr2014 |
|             | 1     | 19855 12may2014 |
|             | 1     | 19880 06jun2014 |
|             | 1     | 19892 18jun2014 |
|             | 1     | 19936 01aug2014 |
|             | 1     | 19989 23sep2014 |
|             | 3949  | .               |
|             | 205   | .j .j           |

-----  
Reg2\_ServDate4\_sys

Registration 2: System Date Service 4 Received  
-----

type: numeric (float)

range: [1.706e+12,1.727e+12] units: 100000  
unique values: 16 missing .: 3947/4168  
unique mv codes: 2 missing .\*: 205/4168

| tabulation: | Freq. | Value     |
|-------------|-------|-----------|
|             | 1     | 1.706e+12 |
|             | 1     | 1.711e+12 |
|             | 1     | 1.711e+12 |
|             | 1     | 1.712e+12 |
|             | 1     | 1.712e+12 |
|             | 1     | 1.713e+12 |
|             | 1     | 1.713e+12 |

```

1 1.713e+12
1 1.713e+12
1 1.715e+12
1 1.716e+12
1 1.718e+12
1 1.719e+12
1 1.719e+12
1 1.723e+12
1 1.727e+12
3947 .
205 .j

```

-----  
Reg2\_ServCameFor5

Registration 2: Service 5 Came For  
-----

```

type: numeric (int)
label: Service

range: [1000,1000]          units: 1
unique values: 1            missing .: 3957/4168
unique mv codes: 2         missing .*: 205/4168

tabulation: Freq.  Numeric  Label
              6          1000  1000. NO ADDITIONAL SERVICE
              3957         .
              205         .j   .j. Ineligible: External site
                               client

```

-----  
Reg2\_ServRecv5

Registration 2: Service 5 Received  
-----

```

type: numeric (int)
label: Service

range: [1000,1000]          units: 1
unique values: 1            missing .: 3958/4168
unique mv codes: 2         missing .*: 205/4168

tabulation: Freq.  Numeric  Label
              5          1000  1000. NO ADDITIONAL SERVICE
              3958         .
              205         .j   .j. Ineligible: External site
                               client

```

-----  
Reg2\_DateServRecv5

Registration 2: Date Service 5 Received  
-----

```

type: numeric daily date (int)

range: [19747,19892]        units: 1
or equivalently: [24jan2014,18jun2014]  units: days
unique values: 5            missing .: 3958/4168
unique mv codes: 2         missing .*: 205/4168

tabulation: Freq.  Value
              1    19747  24jan2014
              1    19830  17apr2014
              1    19855  12may2014
              1    19880  06jun2014
              1    19892  18jun2014
              3958     .
              205     .j           .j

```

-----  
Reg2\_ServDate5\_sys

Registration 2: System Date Service 5 Received  
-----

```

type: numeric (float)

range: [1.706e+12,1.719e+12]      units: 100000
unique values: 6                  missing .: 3957/4168
unique mv codes: 2                missing .*: 205/4168

```

```

tabulation: Freq. Value
             1 1.706e+12
             1 1.713e+12
             1 1.716e+12
             1 1.718e+12
             1 1.719e+12
             1 1.719e+12
3957      .
205      .j

```

---

-----  
Refl\_ID Referral 1 ID  
-----

```

type: numeric (long)

range: [267,86021]      units: 1
unique values: 1958     missing .: 2005/4168
unique mv codes: 2      missing .*: 205/4168

mean: 55888.1
std. dev: 16105.7

percentiles:      10%      25%      50%      75%      90%
                  44356   47537   56184   67247   71531

```

Refl\_ID:  
1. if begins with 99, referral created for analysis

---

-----  
Refl\_Source\_an Referral 1 Source  
-----

```

type: numeric (byte)
label: RefSource

range: [1,3]      units: 1
unique values: 2  missing .: 2005/4168
unique mv codes: 2 missing .*: 205/4168

tabulation: Freq. Numeric Label
             1956      1 1. Registration
             2        3 3. Self
             2005      .
             205      .j .j. Ineligible: External site
                    client

```

Refl\_Source\_an:  
1. created for analysis

---

-----  
Refl\_ParentID Referral 1 Parent ID: RegID or RefID  
-----

```

type: numeric (long)

range: [265,86020]      units: 1
unique values: 1958     missing .: 2005/4168
unique mv codes: 2      missing .*: 205/4168

mean: 55742.8
std. dev: 16051

percentiles:      10%      25%      50%      75%      90%

```

44345 47533 56134 67207 71525

-----  
Refl\_Self\_an Referral 1 for Respondent  
-----

type: numeric (byte)  
label: yesno  
  
range: [0,1] units: 1  
unique values: 2 missing .: 2007/4168  
unique mv codes: 2 missing .\*: 205/4168

| tabulation: | Freq. | Numeric | Label                                |
|-------------|-------|---------|--------------------------------------|
|             | 529   | 0       | 0. No                                |
|             | 1427  | 1       | 1. Yes                               |
|             | 2007  | .       | .                                    |
|             | 205   | .j      | .j. Ineligible: External site client |

Refl\_Self\_an:  
1. created for analysis

-----  
Refl\_Partner\_an Referral 1 for Respondent's Partner  
-----

type: numeric (byte)  
label: yesno  
  
range: [0,1] units: 1  
unique values: 2 missing .: 2007/4168  
unique mv codes: 2 missing .\*: 205/4168

| tabulation: | Freq. | Numeric | Label                                |
|-------------|-------|---------|--------------------------------------|
|             | 1504  | 0       | 0. No                                |
|             | 452   | 1       | 1. Yes                               |
|             | 2007  | .       | .                                    |
|             | 205   | .j      | .j. Ineligible: External site client |

Refl\_Partner\_an:  
1. created for analysis

-----  
Refl\_Other\_an Referral 1 for Other  
-----

type: numeric (byte)  
label: yesno  
  
range: [0,1] units: 1  
unique values: 2 missing .: 2007/4168  
unique mv codes: 2 missing .\*: 205/4168

| tabulation: | Freq. | Numeric | Label                                |
|-------------|-------|---------|--------------------------------------|
|             | 1879  | 0       | 0. No                                |
|             | 77    | 1       | 1. Yes                               |
|             | 2007  | .       | .                                    |
|             | 205   | .j      | .j. Ineligible: External site client |

Refl\_Other\_an:  
1. created for analysis

-----  
Refl\_PersID Referral 1 Given To: Respondent or Person Accompanying  
-----

type: numeric (byte)

label: RefPersID

range: [0,0] units: 1  
 unique values: 1 missing .: 2005/4168  
 unique mv codes: 2 missing .\*: 205/4168

tabulation: Freq. Numeric Label  
 1958 0 0. Respondent  
 2005 .  
 205 .j .j. Ineligible: External site  
 client

-----  
 Refl\_Date Referral 1: Date Given  
 -----

type: numeric daily date (int)

range: [19710,20037] units: 1  
 or equivalently: [18dec2013,10nov2014] units: days  
 unique values: 222 missing .: 2005/4168  
 unique mv codes: 2 missing .\*: 205/4168

mean: 19861.2 = 18may2014 (+ 4 hours)  
 std. dev: 72.675

percentiles: 10% 25% 50% 75% 90%  
 19771 19803 19857 19914 19964  
 17feb2014 21mar2014 14may2014 10jul2014 29aug2014

-----  
 Refl\_ReferralFOR Referral 1 For: Relationship to RefPersID\_Ref1  
 -----

type: numeric (byte)  
 label: relation

range: [0,12] units: 1  
 unique values: 9 missing .: 2005/4168  
 unique mv codes: 2 missing .\*: 205/4168

tabulation: Freq. Numeric Label  
 1429 0 0. SELF  
 440 1 1. SPOUSE  
 12 2 2. COHABITATING PARTNER  
 1 3 3. DAUGHTER  
 6 4 4. SON  
 2 7 7. SISTER  
 26 8 8. BROTHER  
 1 11 11. OTHER RELATIVE  
 41 12 12. OTHER NON-RELATIVE  
 2005 .  
 205 .j .j. Ineligible: External site  
 client

-----  
 Refl\_FromSite Referral 1 from Site  
 -----

type: numeric (byte)  
 label: site

range: [1,13] units: 1  
 unique values: 10 missing .: 2005/4168  
 unique mv codes: 2 missing .\*: 205/4168

tabulation: Freq. Numeric Label  
 261 1 1. SFH HCT - Cairo Road  
 301 2 2. Chawama Clinic - MCH  
 10 3 3. Chawama Clinic - Out Patient

```

Ward (VMMC)
151      5  5. Kamwala Clinic - TB, STI &
        HIV Clinic
332      6  6. Kapata Urban Clinic, MCH
400      7  7. Kapata Urban Clinic, TB, STI
        & HIV
59       8  8. Chipata Gen Hosp - OP VMMC
426     11 11. SFH New Start
1        12 12. SFH - VMMC - CHACHACHA RD
17       13 13. SFH VMMC
2005    .
205     .j .j. Ineligible: External site
        client

```

-----  
Ref1\_ToSite

-----  
Referral 1 to Site

```

type: numeric (byte)
label: site

range: [1,13]          units: 1
unique values: 13      missing .: 2005/4168
unique mv codes: 2     missing .*: 205/4168

```

```

tabulation: Freq.  Numeric  Label
101         1  1. SFH HCT - Cairo Road
389         2  2. Chawama Clinic - MCH
28          3  3. Chawama Clinic - Out Patient
                Ward (VMMC)
7           4  4. Chawama Clinic - TB, STI &
                HIV Clinic
116         5  5. Kamwala Clinic - TB, STI &
                HIV Clinic
17          6  6. Kapata Urban Clinic, MCH
68          7  7. Kapata Urban Clinic, TB, STI
                & HIV
354         8  8. Chipata Gen Hosp - OP VMMC
455         9  9. Chipata Gen Hosp - MCH
106        10 10. Chipata Gen Hosp - TB, STI &
                HIV
156        11 11. SFH New Start
83          12 12. SFH - VMMC - CHACHACHA RD
78          13 13. SFH VMMC
2005       .
205        .j .j. Ineligible: External site
                client

```

-----  
Ref1\_ServiceFor

-----  
Referral 1 for Service

```

type: numeric (int)
label: Service

range: [1,1002]       units: 1
unique values: 14     missing .: 2005/4168
unique mv codes: 2    missing .*: 205/4168

```

```

tabulation: Freq.  Numeric  Label
839         1  1. CCS: CERVICAL CANCER
                SCREENING
11          3  3. FP: INDIVIDUAL COUNSELING
25          4  4. FP: LONG TERM METHODS
                PROVIDED
7           5  5. FP: SHORT TERM METHODS
                PROVIDED
133         6  6. HIV: HTC - COUPLES
154         7  7. HIV: HTC - INDIVIDUAL
1          8  8. HIV: ARV PROVISION

```



```

172      9  9. HIV: CD4 TESTING
11      11 11. HIV: TB TESTING
63      12 12. STI: ASSESSMENT
10      13 13. STI: TREATMENT
6       14 14. VMMC: COUNSELING ONLY
524     15 15. VMMC: PROCEDURE
2       1002 1002. SELF-REFERRAL
2005    .
205     .j .j. Ineligible: External site
                client

```

Ref1\_ServiceFor:

- Those who received referrals for couples HTC were coded in a specific manner based on the services they received prior. - If a respondent had received individual HTC, VMMC counseling or VMMC procedure prior to receiving the referral for couples HTC, s/he received one referral for couples HTC for his/her spouse or partner. - If a respondent did not receive individual HTC, VMMC counseling or VMMC procedure prior to receiving his/her referral for couples HTC, s/he received two referrals for couples HTC: one for self and one for spouse or partner.

-----  
Ref1\_ShowDate Referral 1: Date Return to Act On Referral  
-----

```

type: numeric daily date (int)

range: [19710,20034]          units: 1
or equivalently: [18dec2013,07nov2014]  units: days
unique values: 126           missing .: 3710/4168
unique mv codes: 2           missing .*: 205/4168

mean: 19851.4 = 08may2014 (+ 10 hours)
std. dev: 70.6133

percentiles:      10%      25%      50%      75%      90%
                  19764    19800    19829    19904    19949
                  10feb2014 18mar2014 16apr2014 30jun2014 14aug2014

```

-----  
Ref1\_ShowHMM Referral 1: Time Return to Act On Referral  
-----

```

type: string (str5)

unique values: 159           missing "": 3916/4168

examples: ""
          ""
          ""
          ""

```

-----  
Ref1\_ServDate Referral 1: Date Services Received  
-----

```

type: numeric daily date (int)

range: [19710,20025]          units: 1
or equivalently: [18dec2013,29oct2014]  units: days
unique values: 107           missing .: 3769/4168
unique mv codes: 2           missing .*: 205/4168

mean: 19844.1 = 01may2014 (+ 3 hours)
std. dev: 69.8849

percentiles:      10%      25%      50%      75%      90%
                  19760    19795    19823    19900    19949
                  06feb2014 13mar2014 10apr2014 26jun2014 14aug2014

```

Ref1\_ServHMM

Referral 1: Time Services Received

```

type: string (str5)
unique values: 142          missing "": 3994/4168
examples: ""
           ""
           ""
           ""

```

Ref1\_ServHMM:

1. some missing due to correcting date service received, but not knowing time service received

Ref1\_Counseling

Referral 1: Counseling Received

```

type: numeric (byte)
label: Counseling

range: [1,4]          units: 1
unique values: 3      missing .: 3789/4168
unique mv codes: 2    missing .*: 205/4168

```

| tabulation: | Freq. | Numeric | Label                                |
|-------------|-------|---------|--------------------------------------|
|             | 24    | 1       | 1. GROUP                             |
|             | 131   | 2       | 2. ONE-ON-ONE                        |
|             | 19    | 4       | 4. NONE                              |
|             | 3789  | .       | .                                    |
|             | 205   | .j      | .j. Ineligible: External site client |

Ref1\_ReceivedDayReturned

Referral 1: Services Received Same Day Returned

```

type: numeric (byte)
label: yesno

range: [1,1]          units: 1
unique values: 1      missing .: 3789/4168
unique mv codes: 2    missing .*: 205/4168

```

| tabulation: | Freq. | Numeric | Label                                |
|-------------|-------|---------|--------------------------------------|
|             | 174   | 1       | 1. Yes                               |
|             | 3789  | .       | .                                    |
|             | 205   | .j      | .j. Ineligible: External site client |

Ref1\_ReceivedDayReturned:

1. Yes if Date showed up for services = Date services received (Ref1\_ShowDate=Ref1\_ServDate)

Ref1\_Escort

Referral 1: Escort Provided

```

type: numeric (byte)
label: Ref1_Escort

range: [0,1]          units: 1
unique values: 2      missing .: 0/4168
unique mv codes: 6    missing .*: 4052/4168

```

| tabulation: | Freq. | Numeric | Label  |
|-------------|-------|---------|--------|
|             | 16    | 0       | 0. No  |
|             | 100   | 1       | 1. Yes |

```

2642 .a .a. Not in integrated arm
337 .b .b. No referral
11 .c .c. Received services same day
as registration: escort recorded
in Regl_Escort
839 .d .d. Have not yet received
services from referral
205 .j .j. Ineligible: External site
client
18 .m .m. Missing

```

Ref1\_Escort:

- Those with value of .c received services the same day as registration. Check Regl\_Escort to know whether they received an escort or not (many did). Their escort data is recorded only in Regl\_Escort to enable an accurate count of escorts. (If Regl\_Escort == 1, that is the escort who brought the client to get services from registration site to referral 1 site.)

-----  
Ref1\_EscortTime Referral 1: Time Escort Provided  
-----

```

type: string (str5)
unique values: 79 missing "": 4068/4168
examples: ""
          ""
          ""
          ""

```

-----  
Ref1\_VoucherNumber Referral 1 Voucher Number  
-----

```

type: string (str10)
unique values: 1955 missing "": 2213/4168
examples: ""
          ""
          "02-02-0079"
          "07-08-7604"

```

Ref1\_VoucherNumber:

- if begins with 99, referral created for analysis

-----  
Ref1\_ServCameFor1 Referral 1: Service 1 Came For  
-----

```

type: numeric (byte)
label: Service

range: [1,15] units: 1
unique values: 11 missing .: 3710/4168
unique mv codes: 2 missing .*: 205/4168

tabulation: Freq. Numeric Label
            153      1 1. CCS: CERVICAL CANCER
                2      4 4. FP: LONG TERM METHODS
                8      6 6. HIV: HTC - COUPLES
            20      7 7. HIV: HTC - INDIVIDUAL
             1      8 8. HIV: ARV PROVISION
            21      9 9. HIV: CD4 TESTING
             4     11 11. HIV: TB TESTING
             8     12 12. STI: ASSESSMENT
             3     13 13. STI: TREATMENT

```

```

      1      14 14. VMMC: COUNSELING ONLY
      32      15 15. VMMC: PROCEDURE
3710      .
      205     .j .j. Ineligible: External site
                    client

```

-----  
 Refl\_ServRecv1

Referral 1: Service 1 Received  
 -----

```

      type: numeric (int)
      label: Service

      range: [1,1000]           units: 1
  unique values: 13           missing .: 3769/4168
  unique mv codes: 2         missing .*: 205/4168

```

```

  tabulation: Freq.  Numeric  Label
                99         1  1. CCS: CERVICAL CANCER
                1         3  3. FP: INDIVIDUAL COUNSELING
                4         4  4. FP: LONG TERM METHODS
                1         5  5. FP: SHORT TERM METHODS
                3         6  6. HIV: HTC - COUPLES
                23        7  7. HIV: HTC - INDIVIDUAL
                15        9  9. HIV: CD4 TESTING
                2        11 11. HIV: TB TESTING
                6        12 12. STI: ASSESSMENT
                1        13 13. STI: TREATMENT
                2        14 14. VMMC: COUNSELING ONLY
                28        15 15. VMMC: PROCEDURE
                9       1000 1000. NO ADDITIONAL SERVICE
                3769      .
                205     .j .j. Ineligible: External site
                    client

```

-----  
 Refl\_DateServRec1

Referral 1: Date Service 1 Received  
 -----

```

      type: numeric daily date (int)

      range: [19710,20025]     units: 1
  or equivalently: [18dec2013,29oct2014]  units: days
  unique values: 107         missing .: 3769/4168
  unique mv codes: 2         missing .*: 205/4168

```

```

  mean: 19844.1 = 01may2014 (+ 3 hours)
  std. dev: 69.8849

```

```

  percentiles:      10%      25%      50%      75%      90%
                  19760    19795    19823    19900    19949
                  06feb2014 13mar2014 10apr2014 26jun2014 14aug2014

```

-----  
 Refl\_ServDate1\_sys

Referral 1: System Date Service 1 Received  
 -----

```

      type: numeric (double)

      range: [1.704e+12,1.730e+12]     units: 1000
  unique values: 174         missing .: 3789/4168
  unique mv codes: 2         missing .*: 205/4168

```

```

  mean: 1.7e+12
  std. dev: 6.0e+09

```

```

  percentiles:      10%      25%      50%      75%      90%

```

1.7e+12 1.7e+12 1.7e+12 1.7e+12 1.7e+12

Ref1\_ServDate1\_sys:

- 1. some missing due to correcting date service received, but not knowing time service received

-----  
Ref1\_ServCameFor2

Referral 1: Service 2 Came For  
-----

type: numeric (int)  
label: Service

range: [5,1000] units: 1  
unique values: 2 missing .: 3710/4168  
unique mv codes: 2 missing .\*: 205/4168

| tabulation: | Freq. | Numeric | Label                                |
|-------------|-------|---------|--------------------------------------|
|             | 1     | 5       | 5. FP: SHORT TERM METHODS PROVIDED   |
|             | 252   | 1000    | 1000. NO ADDITIONAL SERVICE          |
|             | 3710  | .       |                                      |
|             | 205   | .j      | .j. Ineligible: External site client |

-----  
Ref1\_ServRecv2

Referral 1: Service 2 Received  
-----

type: numeric (int)  
label: Service

range: [1000,1000] units: 1  
unique values: 1 missing .: 3769/4168  
unique mv codes: 2 missing .\*: 205/4168

| tabulation: | Freq. | Numeric | Label                                |
|-------------|-------|---------|--------------------------------------|
|             | 194   | 1000    | 1000. NO ADDITIONAL SERVICE          |
|             | 3769  | .       |                                      |
|             | 205   | .j      | .j. Ineligible: External site client |

-----  
Ref1\_DateServRec2

Referral 1: Date Service 2 Received  
-----

type: numeric daily date (int)

range: [19710,20025] units: 1  
or equivalently: [18dec2013,29oct2014] units: days  
unique values: 107 missing .: 3769/4168  
unique mv codes: 2 missing .\*: 205/4168

mean: 19844.1 = 01may2014 (+ 3 hours)  
std. dev: 69.8849

| percentiles: | 10%       | 25%       | 50%       | 75%       | 90%       |
|--------------|-----------|-----------|-----------|-----------|-----------|
|              | 19760     | 19795     | 19823     | 19900     | 19949     |
|              | 06feb2014 | 13mar2014 | 10apr2014 | 26jun2014 | 14aug2014 |

-----  
Ref1\_ServDate2\_sys

Referral 1: System Date Service 2 Received  
-----

type: numeric (double)

range: [1.704e+12,1.730e+12] units: 1000  
unique values: 174 missing .: 3789/4168  
unique mv codes: 2 missing .\*: 205/4168

mean: 1.7e+12  
std. dev: 6.0e+09

percentiles: 10% 25% 50% 75% 90%  
1.7e+12 1.7e+12 1.7e+12 1.7e+12 1.7e+12

Ref1\_ServDate2\_sys:

1. some missing due to correcting date service received, but not knowing time service received

-----  
Ref1\_ServCameFor3 Referral 1: Service 3 Came For  
-----

type: numeric (int)  
label: Service

range: [13,1000] units: 1  
unique values: 2 missing .: 3710/4168  
unique mv codes: 2 missing .\*: 205/4168

| tabulation: | Freq. | Numeric | Label                                |
|-------------|-------|---------|--------------------------------------|
|             | 1     | 13      | 13. STI: TREATMENT                   |
|             | 252   | 1000    | 1000. NO ADDITIONAL SERVICE          |
|             | 3710  | .       | .                                    |
|             | 205   | .j      | .j. Ineligible: External site client |

-----  
Ref1\_ServRecv3 Referral 1: Service 3 Received  
-----

type: numeric (int)  
label: Service

range: [1000,1000] units: 1  
unique values: 1 missing .: 3769/4168  
unique mv codes: 2 missing .\*: 205/4168

| tabulation: | Freq. | Numeric | Label                                |
|-------------|-------|---------|--------------------------------------|
|             | 194   | 1000    | 1000. NO ADDITIONAL SERVICE          |
|             | 3769  | .       | .                                    |
|             | 205   | .j      | .j. Ineligible: External site client |

-----  
Ref1\_DateServRec3 Referral 1: Date Service 3 Received  
-----

type: numeric daily date (int)

range: [19710,20025] units: 1  
or equivalently: [18dec2013,29oct2014] units: days  
unique values: 107 missing .: 3769/4168  
unique mv codes: 2 missing .\*: 205/4168

mean: 19844.1 = 01may2014 (+ 3 hours)  
std. dev: 69.8849

percentiles: 10% 25% 50% 75% 90%  
19760 19795 19823 19900 19949  
06feb2014 13mar2014 10apr2014 26jun2014 14aug2014

-----  
Ref1\_ServDate3\_sys Referral 1: System Date Service 3 Received  
-----

type: numeric (double)

range: [1.704e+12,1.730e+12] units: 1000



```

type: numeric (double)

range: [1.704e+12,1.730e+12]          units: 1000
unique values: 174                    missing .: 3789/4168
unique mv codes: 2                    missing .*: 205/4168

mean: 1.7e+12
std. dev: 6.0e+09

percentiles:      10%      25%      50%      75%      90%
                  1.7e+12  1.7e+12  1.7e+12  1.7e+12  1.7e+12

```

Ref1\_ServDate4\_sys:

1. some missing due to correcting date service received, but not knowing time service received

-----  
Ref1\_ServCameFor5

Referral 1: Service 5 Came For  
-----

```

type: numeric (int)
label: Service

range: [1000,1000]          units: 1
unique values: 1            missing .: 3736/4168
unique mv codes: 2          missing .*: 205/4168

tabulation: Freq.  Numeric  Label
              227      1000  1000. NO ADDITIONAL SERVICE
              3736      .
              205      .j   .j. Ineligible: External site
                           client

```

-----  
Ref1\_ServRecv5

Referral 1: Service 5 Received  
-----

```

type: numeric (int)
label: Service

range: [5,1000]          units: 1
unique values: 2          missing .: 3793/4168
unique mv codes: 2        missing .*: 205/4168

tabulation: Freq.  Numeric  Label
              1      5      5. FP: SHORT TERM METHODS
                           PROVIDED
              169     1000  1000. NO ADDITIONAL SERVICE
              3793      .
              205     .j   .j. Ineligible: External site
                           client

```

-----  
Ref1\_DateServRec5

Referral 1: Date Service 5 Received  
-----

```

type: numeric daily date (int)

range: [19710,20025]          units: 1
or equivalently: [18dec2013,29oct2014]  units: days
unique values: 99            missing .: 3792/4168
unique mv codes: 2          missing .*: 205/4168

mean: 19842.7 = 29apr2014 (+ 18 hours)
std. dev: 69.2496

percentiles:      10%      25%      50%      75%      90%
                  19760    19795    19821    19898    19947
                  06feb2014 13mar2014 08apr2014 24jun2014 12aug2014

```



-----  
Ref1\_ServDate5\_sys Referral 1: System Date Service 5 Received  
-----

type: numeric (double)  
range: [1.704e+12,1.730e+12] units: 1000  
unique values: 151 missing .: 3812/4168  
unique mv codes: 2 missing .\*: 205/4168  
mean: 1.7e+12  
std. dev: 5.9e+09  
percentiles: 10% 25% 50% 75% 90%  
1.7e+12 1.7e+12 1.7e+12 1.7e+12 1.7e+12

Ref1\_ServDate5\_sys:  
1. some missing due to correcting date service received, but not knowing time service received

-----  
Ref2\_ID Referral 2 ID  
-----

type: numeric (long)  
range: [268,99172] units: 1  
unique values: 759 missing .: 3204/4168  
unique mv codes: 2 missing .\*: 205/4168  
mean: 54161.1  
std. dev: 15312.8  
percentiles: 10% 25% 50% 75% 90%  
44316 51113 56077 63125 70218

Ref2\_ID:  
1. if begins with 99, referral created for analysis

-----  
Ref2\_Source\_an Referral 2 Source  
-----

type: numeric (byte)  
label: RefSource  
range: [1,2] units: 1  
unique values: 2 missing .: 3204/4168  
unique mv codes: 2 missing .\*: 205/4168  
tabulation: Freq. Numeric Label  
755 1 1. Registration  
4 2 2. Other Referral  
3204 .  
205 .j .j. Ineligible: External site client

Ref2\_Source\_an:  
1. created for analysis

-----  
Ref2\_ParentID Referral 2 Parent ID: RegID or RefID  
-----

type: numeric (long)  
range: [265,86020] units: 1  
unique values: 759 missing .: 3204/4168  
unique mv codes: 2 missing .\*: 205/4168

mean: 53653.5  
 std. dev: 14838.1  
 percentiles: 10% 25% 50% 75% 90%  
 44312 51106 56025 63007 70143

-----  
 Ref2\_Self\_an Referral 2 for Respondent  
 -----

type: numeric (byte)  
 label: yesno  
 range: [0,1] units: 1  
 unique values: 2 missing .: 3204/4168  
 unique mv codes: 2 missing .\*: 205/4168

| tabulation: | Freq. | Numeric | Label                                |
|-------------|-------|---------|--------------------------------------|
|             | 253   | 0       | 0. No                                |
|             | 506   | 1       | 1. Yes                               |
|             | 3204  | .       | .                                    |
|             | 205   | .j      | .j. Ineligible: External site client |

Ref2\_Self\_an:  
 1. created for analysis

-----  
 Ref2\_Partner\_an Referral 2 for Respondent's Partner  
 -----

type: numeric (byte)  
 label: yesno  
 range: [0,1] units: 1  
 unique values: 2 missing .: 3204/4168  
 unique mv codes: 2 missing .\*: 205/4168

| tabulation: | Freq. | Numeric | Label                                |
|-------------|-------|---------|--------------------------------------|
|             | 512   | 0       | 0. No                                |
|             | 247   | 1       | 1. Yes                               |
|             | 3204  | .       | .                                    |
|             | 205   | .j      | .j. Ineligible: External site client |

Ref2\_Partner\_an:  
 1. created for analysis

-----  
 Ref2\_Other\_an Referral 2 for Other  
 -----

type: numeric (byte)  
 label: yesno  
 range: [0,1] units: 1  
 unique values: 2 missing .: 3204/4168  
 unique mv codes: 2 missing .\*: 205/4168

| tabulation: | Freq. | Numeric | Label                                |
|-------------|-------|---------|--------------------------------------|
|             | 753   | 0       | 0. No                                |
|             | 6     | 1       | 1. Yes                               |
|             | 3204  | .       | .                                    |
|             | 205   | .j      | .j. Ineligible: External site client |

Ref2\_Other\_an:  
 1. created for analysis

-----  
Ref2\_PersID Referral 2 Given To: Respondent or Person Accompanying  
-----

type: numeric (byte)  
label: RefPersID

range: [0,0] units: 1  
unique values: 1 missing .: 3204/4168  
unique mv codes: 2 missing .\*: 205/4168

tabulation: Freq. Numeric Label  
759 0 0. Respondent  
3204 .  
205 .j .j. Ineligible: External site  
client

-----  
Ref2\_Date Referral 2: Date Given  
-----

type: numeric daily date (int)

range: [19711,20034] units: 1  
or equivalently: [19dec2013,07nov2014] units: days  
unique values: 159 missing .: 3204/4168  
unique mv codes: 2 missing .\*: 205/4168

mean: 19830.6 = 17apr2014 (+ 15 hours)  
std. dev: 55.9934

percentiles: 10% 25% 50% 75% 90%  
19764 19792 19821 19872 19904  
10feb2014 10mar2014 08apr2014 29may2014 30jun2014

-----  
Ref2\_ReferralFOR Referral 2 For: Relationship to RefPersID\_Ref2  
-----

type: numeric (byte)  
label: relation

range: [0,12] units: 1  
unique values: 8 missing .: 3204/4168  
unique mv codes: 2 missing .\*: 205/4168

tabulation: Freq. Numeric Label  
506 0 0. SELF  
243 1 1. SPOUSE  
4 2 2. COHABITATING PARTNER  
1 4 4. SON  
1 7 7. SISTER  
1 8 8. BROTHER  
1 11 11. OTHER RELATIVE  
2 12 12. OTHER NON-RELATIVE  
3204 .  
205 .j .j. Ineligible: External site  
client

-----  
Ref2\_FromSite Referral 2 from Site  
-----

type: numeric (byte)  
label: site

range: [1,13] units: 1  
unique values: 9 missing .: 3204/4168  
unique mv codes: 2 missing .\*: 205/4168

| tabulation: | Freq. | Numeric | Label                                       |
|-------------|-------|---------|---------------------------------------------|
|             | 43    | 1       | 1. SFH HCT - Cairo Road                     |
|             | 267   | 2       | 2. Chawama Clinic - MCH                     |
|             | 1     | 3       | 3. Chawama Clinic - Out Patient Ward (VMMC) |
|             | 13    | 5       | 5. Kamwala Clinic - TB, STI & HIV Clinic    |
|             | 247   | 6       | 6. Kapata Urban Clinic, MCH                 |
|             | 70    | 7       | 7. Kapata Urban Clinic, TB, STI & HIV       |
|             | 5     | 8       | 8. Chipata Gen Hosp - OP VMMC               |
|             | 101   | 11      | 11. SFH New Start                           |
|             | 12    | 13      | 13. SFH VMMC                                |
|             | 3204  | .       | .                                           |
|             | 205   | .j      | .j. Ineligible: External site client        |

-----  
Ref2\_ToSite

Referral 2 to Site  
-----

type: numeric (byte)  
label: site

range: [1,13] units: 1  
unique values: 13 missing .: 3204/4168  
unique mv codes: 2 missing .\*: 205/4168

| tabulation: | Freq. | Numeric | Label                                       |
|-------------|-------|---------|---------------------------------------------|
|             | 2     | 1       | 1. SFH HCT - Cairo Road                     |
|             | 22    | 2       | 2. Chawama Clinic - MCH                     |
|             | 242   | 3       | 3. Chawama Clinic - Out Patient Ward (VMMC) |
|             | 21    | 4       | 4. Chawama Clinic - TB, STI & HIV Clinic    |
|             | 13    | 5       | 5. Kamwala Clinic - TB, STI & HIV Clinic    |
|             | 2     | 6       | 6. Kapata Urban Clinic, MCH                 |
|             | 8     | 7       | 7. Kapata Urban Clinic, TB, STI & HIV       |
|             | 52    | 8       | 8. Chipata Gen Hosp - OP VMMC               |
|             | 186   | 9       | 9. Chipata Gen Hosp - MCH                   |
|             | 97    | 10      | 10. Chipata Gen Hosp - TB, STI & HIV        |
|             | 67    | 11      | 11. SFH New Start                           |
|             | 24    | 12      | 12. SFH - VMMC - CHACHACHA RD               |
|             | 23    | 13      | 13. SFH VMMC                                |
|             | 3204  | .       | .                                           |
|             | 205   | .j      | .j. Ineligible: External site client        |

-----  
Ref2\_ServiceFor

Referral 2 for Service  
-----

type: numeric (byte)  
label: Service

range: [1,15] units: 1  
unique values: 13 missing .: 3204/4168  
unique mv codes: 2 missing .\*: 205/4168

| tabulation: | Freq. | Numeric | Label                             |
|-------------|-------|---------|-----------------------------------|
|             | 203   | 1       | 1. CCS: CERVICAL CANCER SCREENING |
|             | 1     | 2       | 2. FP: GROUP COUNSELING           |
|             | 1     | 3       | 3. FP: INDIVIDUAL COUNSELING      |
|             | 11    | 4       | 4. FP: LONG TERM METHODS PROVIDED |
|             | 1     | 5       | 5. FP: SHORT TERM METHODS         |

```

PROVIDED
166      6  6. HIV: HTC - COUPLES
72       7  7. HIV: HTC - INDIVIDUAL
82       9  9. HIV: CD4 TESTING
1        10 10. HIV: PCYHOSOCIAL SUPPORT
          (PSS)
6         11 11. HIV: TB TESTING
34        12 12. STI: ASSESSMENT
1         13 13. STI: TREATMENT
180       15 15. VMMC: PROCEDURE
3204     .
205     .j .j. Ineligible: External site
          client

```

Ref2\_ServiceFor:

- Those who received referrals for couples HTC were coded in a specific manner based on the services they received prior. - If a respondent had received individual HTC, VMMC counseling or VMMC procedure prior to receiving the referral for couples HTC, s/he received one referral for couples HTC for his/her spouse or partner. - If a respondent did not receive individual HTC, VMMC counseling or VMMC procedure prior to receiving his/her referral for couples HTC, s/he received two referrals for couples HTC: one for self and one for spouse or partner.

-----  
Ref2\_ShowDate Referral 2: Date Return to Act On Referral  
-----

```

type: numeric daily date (int)

range: [19761,19960]          units: 1
or equivalently: [07feb2014,25aug2014]  units: days
unique values: 21             missing .: 3938/4168
unique mv codes: 2           missing .*: 205/4168

```

```

tabulation: Freq. Value
             1 19761 07feb2014
             2 19771 17feb2014
             1 19786 04mar2014
             1 19788 06mar2014
             1 19792 10mar2014
             1 19814 01apr2014
             2 19823 10apr2014
             1 19835 22apr2014
             2 19855 12may2014
             1 19856 13may2014
             2 19858 15may2014
             1 19872 29may2014
             1 19887 13jun2014
             1 19893 19jun2014
             1 19905 01jul2014
             1 19907 03jul2014
             1 19920 16jul2014
             1 19925 21jul2014
             1 19947 12aug2014
             1 19954 19aug2014
             1 19960 25aug2014
3938     .
205     .j .j

```

-----  
Ref2\_ShowHMM Referral 2: Time Return to Act On Referral  
-----

```

type: string (str5)

unique values: 24             missing "": 4143/4168

tabulation: Freq. Value
             4143 ""
             1  "09-00"

```

```

1 "09-05"
1 "09-07"
1 "09-15"
1 "09-17"
1 "09-19"
1 "09-25"
1 "09-30"
1 "09-33"
2 "09-40"
1 "09-57"
1 "10-00"
1 "10-10"
1 "10-20"
1 "10-39"
1 "10-43"
1 "11-19"
1 "11-24"
1 "11-41"
1 "11-45"
1 "12-07"
1 "12-31"
1 "12-37"
1 "13-06"

```

-----  
Ref2\_ServDate

Referral 2: Date Services Received  
-----

```

type: numeric daily date (int)
range: [19761,19954] units: 1
or equivalently: [07feb2014,19aug2014] units: days
unique values: 13 missing .: 3950/4168
unique mv codes: 2 missing .*: 205/4168

```

```

tabulation: Freq. Value
             1 19761 07feb2014
             1 19771 17feb2014
             1 19806 24mar2014
             1 19810 28mar2014
             1 19814 01apr2014
             1 19830 17apr2014
             1 19845 02may2014
             1 19862 19may2014
             1 19872 29may2014
             1 19905 01jul2014
             1 19925 21jul2014
             1 19947 12aug2014
             1 19954 19aug2014
3950 . .
205 .j .j

```

-----  
Ref2\_ServHMM

Referral 2: Time Services Received  
-----

```

type: string (str5)
unique values: 8 missing "": 4160/4168

```

```

tabulation: Freq. Value
             4160 ""
             1 "10-21"
             1 "10-49"
             1 "10-50"
             1 "11-46"
             1 "12-10"
             1 "12-38"
             1 "14-17"
             1 "15-54"

```

Ref2\_ServHMM:

1. some missing due to correcting date service received, but not knowing time service received

-----  
 Ref2\_Counseling

Referral 2: Counseling Received  
 -----

type: numeric (byte)  
 label: Counseling

range: [2,4] units: 1  
 unique values: 2 missing .: 3952/4168  
 unique mv codes: 2 missing .\*: 205/4168

| tabulation: | Freq. | Numeric | Label                                |
|-------------|-------|---------|--------------------------------------|
|             | 8     | 2       | 2. ONE-ON-ONE                        |
|             | 3     | 4       | 4. NONE                              |
|             | 3952  | .       |                                      |
|             | 205   | .j      | .j. Ineligible: External site client |

-----  
 Ref2\_ReceivedDayReturned

Referral 2: Services Received Same Day Returned  
 -----

type: numeric (byte)  
 label: yesno

range: [1,1] units: 1  
 unique values: 1 missing .: 3952/4168  
 unique mv codes: 2 missing .\*: 205/4168

| tabulation: | Freq. | Numeric | Label                                |
|-------------|-------|---------|--------------------------------------|
|             | 11    | 1       | 1. Yes                               |
|             | 3952  | .       |                                      |
|             | 205   | .j      | .j. Ineligible: External site client |

Ref2\_ReceivedDayReturned:

1. Yes if Date showed up for services = Date services received  
 (Ref1\_ShowDate=Ref1\_ServDate)

-----  
 Ref2\_Escort

Referral 2: Escort Provided  
 -----

type: numeric (byte)  
 label: Ref2\_Escort

range: [0,1] units: 1  
 unique values: 2 missing .: 0/4168  
 unique mv codes: 6 missing .\*: 4159/4168

| tabulation: | Freq. | Numeric | Label                                                                                  |
|-------------|-------|---------|----------------------------------------------------------------------------------------|
|             | 1     | 0       | 0. No                                                                                  |
|             | 8     | 1       | 1. Yes                                                                                 |
|             | 2642  | .a      | .a. Not in integrated arm                                                              |
|             | 959   | .b      | .b. No referral                                                                        |
|             | 1     | .c      | .c. Received services same day/same site as referral 1: escort recorded in Ref1_Escort |
|             | 350   | .d      | .d. Have not yet received services from referral                                       |
|             | 205   | .j      | .j. Ineligible: External site client                                                   |
|             | 2     | .m      | .m. Missing                                                                            |

Ref2\_Escort:

- Those with value of .c received services the same day/same site as referral 1. Check Ref1\_Escort to know whether they received an escort. Their escort data is recorded only in Ref1\_Escort to enable an accurate count of escorts. (If Ref1\_Escort == 1, that is the escort who brought the client to one site to get services from referral 1 and referral 2.)

-----  
 Ref2\_EscortTime Referral 2: Time Escort Provided  
 -----

type: string (str5)  
 unique values: 8 missing "": 4160/4168

| tabulation: | Freq. | Value   |
|-------------|-------|---------|
|             | 4160  | "       |
|             | 1     | "09-33" |
|             | 1     | "09-43" |
|             | 1     | "10-50" |
|             | 1     | "11-00" |
|             | 1     | "11-47" |
|             | 1     | "12-11" |
|             | 1     | "12-40" |
|             | 1     | "13-08" |

-----  
 Ref2\_VoucherNumber Referral 2 Voucher Number  
 -----

type: string (str10)  
 unique values: 759 missing "": 3409/4168

examples: ""  
 ""  
 ""  
 ""

Ref2\_VoucherNumber:  
 1. if begins with 99, referral created for analysis

-----  
 Ref2\_ServCameFor1 Referral 2: Service 1 Came For  
 -----

type: numeric (byte)  
 label: Service  
 range: [1,15] units: 1  
 unique values: 5 missing .: 3938/4168  
 unique mv codes: 2 missing .\*: 205/4168

| tabulation: | Freq. | Numeric | Label                                |
|-------------|-------|---------|--------------------------------------|
|             | 7     | 1       | 1. CCS: CERVICAL CANCER SCREENING    |
|             | 5     | 6       | 6. HIV: HTC - COUPLES                |
|             | 6     | 9       | 9. HIV: CD4 TESTING                  |
|             | 6     | 12      | 12. STI: ASSESSMENT                  |
|             | 1     | 15      | 15. VMMC: PROCEDURE                  |
|             | 3938  | .       | .                                    |
|             | 205   | .j      | .j. Ineligible: External site client |

-----  
 Ref2\_ServRecv1 Referral 2: Service 1 Received  
 -----

type: numeric (byte)  
 label: Service



range: [1,15] units: 1  
 unique values: 5 missing .: 3950/4168  
 unique mv codes: 2 missing .\*: 205/4168

tabulation: Freq. Numeric Label  
 5 1 1. CCS: CERVICAL CANCER  
 SCREENING  
 2 6 6. HIV: HTC - COUPLES  
 2 9 9. HIV: CD4 TESTING  
 3 12 12. STI: ASSESSMENT  
 1 15 15. VMMC: PROCEDURE  
 3950 .  
 205 .j .j. Ineligible: External site  
 client

-----  
 Ref2\_DateServRec1 Referral 2: Date Service 1 Received  
 -----

type: numeric daily date (int)

range: [19761,19954] units: 1  
 or equivalently: [07feb2014,19aug2014] units: days  
 unique values: 13 missing .: 3950/4168  
 unique mv codes: 2 missing .\*: 205/4168

tabulation: Freq. Value  
 1 19761 07feb2014  
 1 19771 17feb2014  
 1 19806 24mar2014  
 1 19810 28mar2014  
 1 19814 01apr2014  
 1 19830 17apr2014  
 1 19845 02may2014  
 1 19862 19may2014  
 1 19872 29may2014  
 1 19905 01jul2014  
 1 19925 21jul2014  
 1 19947 12aug2014  
 1 19954 19aug2014  
 3950 .  
 205 .j .j

-----  
 Ref2\_ServDate1\_sys Referral 2: System Date Service 1 Received  
 -----

type: numeric (double)

range: [1.707e+12,1.724e+12] units: 10000  
 unique values: 8 missing .: 3955/4168  
 unique mv codes: 2 missing .\*: 205/4168

tabulation: Freq. Value  
 1 1.707e+12  
 1 1.708e+12  
 1 1.712e+12  
 1 1.717e+12  
 1 1.720e+12  
 1 1.722e+12  
 1 1.723e+12  
 1 1.724e+12  
 3955 .  
 205 .j

Ref2\_ServDate1\_sys:

1. some missing due to correcting date service received, but not knowing time service received

-----

Ref2\_ServCameFor2

Referral 2: Service 2 Came For

```

type: numeric (int)
label: Service

range: [1000,1000]          units: 1
unique values: 1            missing .: 3938/4168
unique mv codes: 2         missing .*: 205/4168

```

```

tabulation: Freq.  Numeric  Label
              25      1000  1000. NO ADDITIONAL SERVICE
              3938      .
              205      .j   .j. Ineligible: External site
                               client

```

Ref2\_ServRecv2

Referral 2: Service 2 Received

```

type: numeric (int)
label: Service

range: [1000,1000]          units: 1
unique values: 1            missing .: 3950/4168
unique mv codes: 2         missing .*: 205/4168

```

```

tabulation: Freq.  Numeric  Label
              13      1000  1000. NO ADDITIONAL SERVICE
              3950      .
              205      .j   .j. Ineligible: External site
                               client

```

Ref2\_DateServRec2

Referral 2: Date Service 2 Received

```

type: numeric daily date (int)

range: [19761,19954]        units: 1
or equivalently: [07feb2014,19aug2014]  units: days
unique values: 13          missing .: 3950/4168
unique mv codes: 2         missing .*: 205/4168

```

```

tabulation: Freq.  Value
              1  19761  07feb2014
              1  19771  17feb2014
              1  19806  24mar2014
              1  19810  28mar2014
              1  19814  01apr2014
              1  19830  17apr2014
              1  19845  02may2014
              1  19862  19may2014
              1  19872  29may2014
              1  19905  01jul2014
              1  19925  21jul2014
              1  19947  12aug2014
              1  19954  19aug2014
              3950  .
              205  .j   .j

```

Ref2\_ServDate2\_sys

Referral 2: System Date Service 2 Received

```

type: numeric (double)

range: [1.707e+12,1.724e+12]  units: 10000
unique values: 8              missing .: 3955/4168
unique mv codes: 2           missing .*: 205/4168

```

```

tabulation:  Freq.  Value
              1  1.707e+12
              1  1.708e+12
              1  1.712e+12
              1  1.717e+12
              1  1.720e+12
              1  1.722e+12
              1  1.723e+12
              1  1.724e+12
            3955  .
            205  .j

```

Ref2\_ServDate2\_sys:

1. some missing due to correcting date service received, but not knowing time service received

-----  
Ref2\_ServCameFor3

Referral 2: Service 3 Came For  
-----

```

type:  numeric (int)
label:  Service

range:  [1000,1000]          units:  1
unique values:  1          missing  .:  3938/4168
unique mv codes:  2          missing  .*:  205/4168

```

```

tabulation:  Freq.  Numeric  Label
              25      1000  1000. NO ADDITIONAL SERVICE
              3938      .
              205      .j  .j. Ineligible: External site
                           client

```

-----  
Ref2\_ServRecv3

Referral 2: Service 3 Received  
-----

```

type:  numeric (int)
label:  Service

range:  [1000,1000]          units:  1
unique values:  1          missing  .:  3950/4168
unique mv codes:  2          missing  .*:  205/4168

```

```

tabulation:  Freq.  Numeric  Label
              13      1000  1000. NO ADDITIONAL SERVICE
              3950      .
              205      .j  .j. Ineligible: External site
                           client

```

-----  
Ref2\_DateServRec3

Referral 2: Date Service 3 Received  
-----

```

type:  numeric daily date (int)

range:  [19761,19954]          units:  1
or equivalently:  [07feb2014,19aug2014]  units:  days
unique values:  13          missing  .:  3950/4168
unique mv codes:  2          missing  .*:  205/4168

```

```

tabulation:  Freq.  Value
              1  19761  07feb2014
              1  19771  17feb2014
              1  19806  24mar2014
              1  19810  28mar2014
              1  19814  01apr2014
              1  19830  17apr2014
              1  19845  02may2014

```

```

1 19862 19may2014
1 19872 29may2014
1 19905 01jul2014
1 19925 21jul2014
1 19947 12aug2014
1 19954 19aug2014
3950 .
205 .j

```

-----  
Ref2\_ServDate3\_sys Referral 2: System Date Service 3 Received  
-----

```

type: numeric (double)
range: [1.707e+12,1.724e+12] units: 10000
unique values: 8 missing .: 3955/4168
unique mv codes: 2 missing .*: 205/4168

```

```

tabulation: Freq. Value
1 1.707e+12
1 1.708e+12
1 1.712e+12
1 1.717e+12
1 1.720e+12
1 1.722e+12
1 1.723e+12
1 1.724e+12
3955 .
205 .j

```

Ref2\_ServDate3\_sys:  
1. some missing due to correcting date service received, but not knowing time service received

-----  
Ref2\_ServCameFor4 Referral 2: Service 4 Came For  
-----

```

type: numeric (int)
label: Service
range: [1000,1000] units: 1
unique values: 1 missing .: 3938/4168
unique mv codes: 2 missing .*: 205/4168

```

```

tabulation: Freq. Numeric Label
25 1000 1000. NO ADDITIONAL SERVICE
3938 .
205 .j .j. Ineligible: External site
client

```

-----  
Ref2\_ServRecv4 Referral 2: Service 4 Received  
-----

```

type: numeric (int)
label: Service
range: [1000,1000] units: 1
unique values: 1 missing .: 3950/4168
unique mv codes: 2 missing .*: 205/4168

```

```

tabulation: Freq. Numeric Label
13 1000 1000. NO ADDITIONAL SERVICE
3950 .
205 .j .j. Ineligible: External site
client

```

```

-----
type: numeric daily date (int)
range: [19761,19954] units: 1
or equivalently: [07feb2014,19aug2014] units: days
unique values: 13 missing .: 3950/4168
unique mv codes: 2 missing .*: 205/4168

```

```

tabulation: Freq. Value
             1 19761 07feb2014
             1 19771 17feb2014
             1 19806 24mar2014
             1 19810 28mar2014
             1 19814 01apr2014
             1 19830 17apr2014
             1 19845 02may2014
             1 19862 19may2014
             1 19872 29may2014
             1 19905 01jul2014
             1 19925 21jul2014
             1 19947 12aug2014
             1 19954 19aug2014
3950 .
205 .j .j

```

```

-----
type: numeric (double)
range: [1.707e+12,1.724e+12] units: 10000
unique values: 8 missing .: 3955/4168
unique mv codes: 2 missing .*: 205/4168

```

```

tabulation: Freq. Value
             1 1.707e+12
             1 1.708e+12
             1 1.712e+12
             1 1.717e+12
             1 1.720e+12
             1 1.722e+12
             1 1.723e+12
             1 1.724e+12
3955 .
205 .j

```

## Ref2\_ServDate4\_sys:

1. some missing due to correcting date service received, but not knowing time service received

```

-----
type: numeric (int)
label: Service
range: [1000,1000] units: 1
unique values: 1 missing .: 3938/4168
unique mv codes: 2 missing .*: 205/4168

```

```

tabulation: Freq. Numeric Label
             25      1000 1000. NO ADDITIONAL SERVICE
             3938      .
             205      .j .j. Ineligible: External site
                    client

```

-----  
Ref2\_ServRecv5

Referral 2: Service 5 Received  
-----

type: numeric (int)  
label: Service

range: [1000,1000] units: 1  
unique values: 1 missing .: 3950/4168  
unique mv codes: 2 missing .\*: 205/4168

tabulation: Freq. Numeric Label  
13 1000 1000. NO ADDITIONAL SERVICE  
3950 .  
205 .j .j. Ineligible: External site  
client

-----  
Ref2\_DateServRec5

Referral 2: Date Service 5 Received  
-----

type: numeric daily date (int)

range: [19761,19954] units: 1  
or equivalently: [07feb2014,19aug2014] units: days  
unique values: 13 missing .: 3950/4168  
unique mv codes: 2 missing .\*: 205/4168

tabulation: Freq. Value  
1 19761 07feb2014  
1 19771 17feb2014  
1 19806 24mar2014  
1 19810 28mar2014  
1 19814 01apr2014  
1 19830 17apr2014  
1 19845 02may2014  
1 19862 19may2014  
1 19872 29may2014  
1 19905 01jul2014  
1 19925 21jul2014  
1 19947 12aug2014  
1 19954 19aug2014  
3950 . .  
205 .j .j

-----  
Ref2\_ServDate5\_sys

Referral 2: System Date Service 5 Received  
-----

type: numeric (double)

range: [1.707e+12,1.724e+12] units: 10000  
unique values: 8 missing .: 3955/4168  
unique mv codes: 2 missing .\*: 205/4168

tabulation: Freq. Value  
1 1.707e+12  
1 1.708e+12  
1 1.712e+12  
1 1.717e+12  
1 1.720e+12  
1 1.722e+12  
1 1.723e+12  
1 1.724e+12  
3955 .  
205 .j

Ref2\_ServDate5\_sys:

1. some missing due to correcting date service received, but not knowing time service received

-----  
Ref3\_ID Referral 3 ID  
-----

type: numeric (long)  
range: [279,99194] units: 1  
unique values: 273 missing .: 3690/4168  
unique mv codes: 2 missing .\*: 205/4168  
mean: 66250.5  
std. dev: 24881.5  
percentiles: 10% 25% 50% 75% 90%  
51063 51384 56563 99018 99129

Ref3\_ID:  
1. if begins with 99, referral created for analysis

-----  
Ref3\_Source\_an Referral 3 Source  
-----

type: numeric (byte)  
label: RefSource  
range: [1,2] units: 1  
unique values: 2 missing .: 3690/4168  
unique mv codes: 2 missing .\*: 205/4168  
tabulation: Freq. Numeric Label  
269 1 1. Registration  
4 2 2. Other Referral  
3690 .  
205 .j .j. Ineligible: External site  
client

Ref3\_Source\_an:  
1. created for analysis

-----  
Ref3\_ParentID Referral 3 Parent ID: RegID or RefID  
-----

type: numeric (long)  
range: [265,86020] units: 1  
unique values: 273 missing .: 3690/4168  
unique mv codes: 2 missing .\*: 205/4168  
mean: 52884.1  
std. dev: 15853.8  
percentiles: 10% 25% 50% 75% 90%  
51002 51220 51630 56775 70097

-----  
Ref3\_Self\_an Referral 3 for Respondent  
-----

type: numeric (byte)  
label: yesno  
range: [0,1] units: 1  
unique values: 2 missing .: 3690/4168  
unique mv codes: 2 missing .\*: 205/4168  
tabulation: Freq. Numeric Label  
175 0 0. No

98 1 1. Yes  
3690 .  
205 .j .j. Ineligible: External site  
client

Ref3\_Self\_an:  
1. created for analysis

-----  
Ref3\_Partner\_an Referral 3 for Respondent's Partner  
-----

type: numeric (byte)  
label: yesno  
  
range: [0,1] units: 1  
unique values: 2 missing .: 3690/4168  
unique mv codes: 2 missing .\*: 205/4168

| tabulation: | Freq. | Numeric | Label                                   |
|-------------|-------|---------|-----------------------------------------|
|             | 114   | 0       | 0. No                                   |
|             | 159   | 1       | 1. Yes                                  |
|             | 3690  | .       | .                                       |
|             | 205   | .j      | .j. Ineligible: External site<br>client |

Ref3\_Partner\_an:  
1. created for analysis

-----  
Ref3\_Other\_an Referral 3 for Other  
-----

type: numeric (byte)  
label: yesno  
  
range: [0,1] units: 1  
unique values: 2 missing .: 3690/4168  
unique mv codes: 2 missing .\*: 205/4168

| tabulation: | Freq. | Numeric | Label                                   |
|-------------|-------|---------|-----------------------------------------|
|             | 257   | 0       | 0. No                                   |
|             | 16    | 1       | 1. Yes                                  |
|             | 3690  | .       | .                                       |
|             | 205   | .j      | .j. Ineligible: External site<br>client |

Ref3\_Other\_an:  
1. created for analysis

-----  
Ref3\_PersID Referral 3 Given To: Respondent or Person Accompanying  
-----

type: numeric (byte)  
label: RefPersID  
  
range: [0,0] units: 1  
unique values: 1 missing .: 3690/4168  
unique mv codes: 2 missing .\*: 205/4168

| tabulation: | Freq. | Numeric | Label                                   |
|-------------|-------|---------|-----------------------------------------|
|             | 273   | 0       | 0. Respondent                           |
|             | 3690  | .       | .                                       |
|             | 205   | .j      | .j. Ineligible: External site<br>client |

-----  
Ref3\_Date Referral 3: Date Given  
-----



```

type: numeric daily date (int)

range: [19712,19996]          units: 1
or equivalently: [20dec2013,30sep2014]  units: days
unique values: 112           missing .: 3690/4168
unique mv codes: 2           missing .*: 205/4168

mean: 19820.6 = 07apr2014 (+ 13 hours)
std. dev: 51.3441

percentiles:      10%      25%      50%      75%      90%
                  19764    19782    19813    19859    19890
                  10feb2014 28feb2014 31mar2014 16may2014 16jun2014

```

---

Ref3\_ReferralFOR Referral 3 For: Relationship to RefPersID\_Ref3

---

```

type: numeric (byte)
label: relation

range: [0,12]          units: 1
unique values: 6       missing .: 3690/4168
unique mv codes: 2     missing .*: 205/4168

```

| tabulation: | Freq. | Numeric | Label                                |
|-------------|-------|---------|--------------------------------------|
|             | 98    | 0       | 0. SELF                              |
|             | 156   | 1       | 1. SPOUSE                            |
|             | 3     | 2       | 2. COHABITATING PARTNER              |
|             | 1     | 3       | 3. DAUGHTER                          |
|             | 1     | 4       | 4. SON                               |
|             | 14    | 12      | 12. OTHER NON-RELATIVE               |
|             | 3690  | .       | .                                    |
|             | 205   | .j      | .j. Ineligible: External site client |

---

Ref3\_FromSite Referral 3 from Site

---

```

type: numeric (byte)
label: site

range: [1,13]          units: 1
unique values: 9       missing .: 3690/4168
unique mv codes: 2     missing .*: 205/4168

```

| tabulation: | Freq. | Numeric | Label                                       |
|-------------|-------|---------|---------------------------------------------|
|             | 1     | 1       | 1. SFH HCT - Cairo Road                     |
|             | 191   | 2       | 2. Chawama Clinic - MCH                     |
|             | 1     | 3       | 3. Chawama Clinic - Out Patient Ward (VMMC) |
|             | 1     | 5       | 5. Kamwala Clinic - TB, STI & HIV Clinic    |
|             | 58    | 6       | 6. Kapata Urban Clinic, MCH                 |
|             | 2     | 7       | 7. Kapata Urban Clinic, TB, STI & HIV       |
|             | 3     | 8       | 8. Chipata Gen Hosp - OP VMMC               |
|             | 14    | 11      | 11. SFH New Start                           |
|             | 2     | 13      | 13. SFH VMMC                                |
|             | 3690  | .       | .                                           |
|             | 205   | .j      | .j. Ineligible: External site client        |

---

Ref3\_ToSite Referral 3 to Site

---

```

type: numeric (byte)

```

```

label: site

range: [2,13]          units: 1
unique values: 11      missing .: 3690/4168
unique mv codes: 2     missing .*: 205/4168

```

```

tabulation: Freq.  Numeric  Label
              3          2  2. Chawama Clinic - MCH
              169        3  3. Chawama Clinic - Out Patient
                    Ward (VMMC)
              21         4  4. Chawama Clinic - TB, STI &
                    HIV Clinic
              1          6  6. Kapata Urban Clinic, MCH
              4          7  7. Kapata Urban Clinic, TB, STI
                    & HIV
              5          8  8. Chipata Gen Hosp - OP VMMC
              9          9  9. Chipata Gen Hosp - MCH
              24         10  10. Chipata Gen Hosp - TB, STI &
                    HIV
              31         11  11. SFH New Start
              1          12  12. SFH - VMMC - CHACHACHA RD
              5          13  13. SFH VMMC
              3690        .
              205        .j  .j. Ineligible: External site
                    client

```

-----  
Ref3\_ServiceFor

Referral 3 for Service  
-----

```

type: numeric (byte)
label: Service

range: [1,15]          units: 1
unique values: 9       missing .: 3690/4168
unique mv codes: 2     missing .*: 205/4168

```

```

tabulation: Freq.  Numeric  Label
              11         1  1. CCS: CERVICAL CANCER
                    SCREENING
              2          4  4. FP: LONG TERM METHODS
                    PROVIDED
              134         6  6. HIV: HTC - COUPLES
              17         7  7. HIV: HTC - INDIVIDUAL
              25         9  9. HIV: CD4 TESTING
              1          10  10. HIV: PCYHOSOCIAL SUPPORT
                    (PSS)
              1          11  11. HIV: TB TESTING
              1          12  12. STI: ASSESSMENT
              81         15  15. VMMC: PROCEDURE
              3690        .
              205        .j  .j. Ineligible: External site
                    client

```

Ref3\_ServiceFor:

- Those who received referrals for couples HTC were coded in a specific manner based on the services they received prior. - If a respondent had received individual HTC, VMMC counseling or VMMC procedure prior to receiving the referral for couples HTC, s/he received one referral for couples HTC for his/her spouse or partner. - If a respondent did not receive individual HTC, VMMC counseling or VMMC procedure prior to receiving his/her referral for couples HTC, s/he received two referrals for couples HTC: one for self and one for spouse or partner.

-----  
Ref3\_ShowDate

Referral 3: Date Return to Act On Referral  
-----

```

type: numeric daily date (int)

range: [19823,19907]  units: 1

```

or equivalently: [10apr2014,03jul2014] units: days  
unique values: 2 missing .: 3961/4168  
unique mv codes: 2 missing .\*: 205/4168

tabulation: Freq. Value  
1 19823 10apr2014  
1 19907 03jul2014  
3961 . .  
205 .j .j

-----  
Ref3\_ShowHMM Referral 3: Time Return to Act On Referral  
-----

type: string (str5)  
unique values: 2 missing "": 4166/4168

tabulation: Freq. Value  
4166 ""  
1 "09-07"  
1 "12-31"

-----  
Ref3\_ServDate Referral 3: Date Services Received  
-----

type: numeric daily date (int)  
range: [19806,19806] units: 1  
or equivalently: [24mar2014,24mar2014] units: days  
unique values: 1 missing .: 3962/4168  
unique mv codes: 2 missing .\*: 205/4168

tabulation: Freq. Value  
1 19806 24mar2014  
3962 . .  
205 .j .j

-----  
Ref3\_ServHMM Referral 3: Time Services Received  
-----

type: string (str1), but longest is str0  
unique values: 0 missing "": 4168/4168

tabulation: Freq. Value  
4168 ""

Ref3\_ServHMM:  
1. some missing due to correcting date service received, but not knowing time service received

-----  
Ref3\_Counseling Referral 3: Counseling Received  
-----

type: numeric (byte)  
label: Counseling  
range: [.,.] units: .  
unique values: 0 missing .: 3963/4168  
unique mv codes: 2 missing .\*: 205/4168

tabulation: Freq. Numeric Label  
3963 .  
205 .j .j. Ineligible: External site client

-----  
Ref3\_ReceivedDayReturned Referral 3: Services Received Same Day Returned  
-----

type: numeric (byte)  
label: yesno  
range: [.,.] units: .  
unique values: 0 missing .: 3963/4168  
unique mv codes: 2 missing .\*: 205/4168  
tabulation: Freq. Numeric Label  
3963 .  
205 .j .j. Ineligible: External site  
client

Ref3\_ReceivedDayReturned:

1. Yes if Date showed up for services = Date services received  
(Ref1\_ShowDate=Ref1\_ServDate)

-----  
Ref3\_Escort Referral 3: Escort Provided  
-----

type: numeric (byte)  
label: Ref3\_Escort  
range: [.,.] units: .  
unique values: 0 missing .: 0/4168  
unique mv codes: 5 missing .\*: 4168/4168  
tabulation: Freq. Numeric Label  
2642 .a .a. Not in integrated arm  
1187 .b .b. No referral  
133 .d .d. Have not yet received  
services from referral  
205 .j .j. Ineligible: External site  
client  
1 .m .m. Missing

-----  
Ref3\_EscortTime Referral 3: Time Escort Provided  
-----

type: string (str1), but longest is str0  
unique values: 0 missing "": 4168/4168  
tabulation: Freq. Value  
4168 ""

-----  
Ref3\_VoucherNumber Referral 3 Voucher Number  
-----

type: string (str10)  
unique values: 273 missing "": 3895/4168  
examples: ""  
""  
""  
""

Ref3\_VoucherNumber:

1. if begins with 99, referral created for analysis

-----  
Ref3\_ServCameFor1 Referral 3: Service 1 Came For  
-----

```

type: numeric (byte)
label: Service

range: [6,6] units: 1
unique values: 1 missing .: 3961/4168
unique mv codes: 2 missing .*: 205/4168

```

```

tabulation: Freq. Numeric Label
              2          6 6. HIV: HTC - COUPLES
              3961         .
              205         .j .j. Ineligible: External site
                                client

```

-----  
Ref3\_ServRecv1 Referral 3: Service 1 Received  
-----

```

type: numeric (byte)
label: Service

range: [6,6] units: 1
unique values: 1 missing .: 3962/4168
unique mv codes: 2 missing .*: 205/4168

```

```

tabulation: Freq. Numeric Label
              1          6 6. HIV: HTC - COUPLES
              3962         .
              205         .j .j. Ineligible: External site
                                client

```

-----  
Ref3\_DateServRec1 Referral 3: Date Service 1 Received  
-----

```

type: numeric daily date (int)

range: [19806,19806] units: 1
or equivalently: [24mar2014,24mar2014] units: days
unique values: 1 missing .: 3962/4168
unique mv codes: 2 missing .*: 205/4168

```

```

tabulation: Freq. Value
              1 19806 24mar2014
              3962 .
              205 .j

```

-----  
Ref3\_ServDate1\_sys Referral 3: System Date Service 1 Received  
-----

```

type: numeric (byte)

range: [.,.] units: .
unique values: 0 missing .: 3963/4168
unique mv codes: 2 missing .*: 205/4168

```

```

tabulation: Freq. Value
              3963 .
              205 .j

```

Ref3\_ServDate1\_sys:  
1. some missing due to correcting date service received, but not knowing time service received

-----  
Ref3\_ServCameFor2 Referral 3: Service 2 Came For  
-----

```

type: numeric (int)

```

```

label: Service

range: [1000,1000]          units: 1
unique values: 1            missing .: 3961/4168
unique mv codes: 2         missing .*: 205/4168

tabulation: Freq.  Numeric  Label
             2      1000  1000. NO ADDITIONAL SERVICE
             3961      .
             205      .j  .j. Ineligible: External site
                           client

```

-----  
Ref3\_ServRecv2 Referral 3: Service 2 Received  
-----

```

type: numeric (int)
label: Service

range: [1000,1000]          units: 1000
unique values: 1            missing .: 3962/4168
unique mv codes: 2         missing .*: 205/4168

tabulation: Freq.  Numeric  Label
             1      1000  1000. NO ADDITIONAL SERVICE
             3962      .
             205      .j  .j. Ineligible: External site
                           client

```

-----  
Ref3\_DateServRec2 Referral 3: Date Service 2 Received  
-----

```

type: numeric daily date (int)

range: [19806,19806]          units: 1
or equivalently: [24mar2014,24mar2014]  units: days
unique values: 1            missing .: 3962/4168
unique mv codes: 2         missing .*: 205/4168

tabulation: Freq.  Value
             1  19806  24mar2014
             3962  .
             205  .j  .j

```

-----  
Ref3\_ServDate2\_sys Referral 3: System Date Service 2 Received  
-----

```

type: numeric (byte)

range: [.,.]          units: .
unique values: 0      missing .: 3963/4168
unique mv codes: 2    missing .*: 205/4168

tabulation: Freq.  Value
             3963  .
             205  .j

```

Ref3\_ServDate2\_sys:  
1. some missing due to correcting date service received, but not knowing time service received

-----  
Ref3\_ServCameFor3 Referral 3: Service 3 Came For  
-----

```

type: numeric (int)
label: Service

```

range: [1000,1000] units: 1  
unique values: 1 missing .: 3961/4168  
unique mv codes: 2 missing .\*: 205/4168

| tabulation: | Freq. | Numeric | Label                                |
|-------------|-------|---------|--------------------------------------|
|             | 2     | 1000    | 1000. NO ADDITIONAL SERVICE          |
|             | 3961  | .       |                                      |
|             | 205   | .j      | .j. Ineligible: External site client |

-----  
Ref3\_ServRecv3 Referral 3: Service 3 Received  
-----

type: numeric (int)  
label: Service

range: [1000,1000] units: 1000  
unique values: 1 missing .: 3962/4168  
unique mv codes: 2 missing .\*: 205/4168

| tabulation: | Freq. | Numeric | Label                                |
|-------------|-------|---------|--------------------------------------|
|             | 1     | 1000    | 1000. NO ADDITIONAL SERVICE          |
|             | 3962  | .       |                                      |
|             | 205   | .j      | .j. Ineligible: External site client |

-----  
Ref3\_DateServRec3 Referral 3: Date Service 3 Received  
-----

type: numeric daily date (int)

range: [19806,19806] units: 1  
or equivalently: [24mar2014,24mar2014] units: days  
unique values: 1 missing .: 3962/4168  
unique mv codes: 2 missing .\*: 205/4168

| tabulation: | Freq. | Value           |
|-------------|-------|-----------------|
|             | 1     | 19806 24mar2014 |
|             | 3962  | .               |
|             | 205   | .j              |

-----  
Ref3\_ServDate3\_sys Referral 3: System Date Service 3 Received  
-----

type: numeric (byte)

range: [.,.] units: .  
unique values: 0 missing .: 3963/4168  
unique mv codes: 2 missing .\*: 205/4168

| tabulation: | Freq. | Value |
|-------------|-------|-------|
|             | 3963  | .     |
|             | 205   | .j    |

Ref3\_ServDate3\_sys:

1. some missing due to correcting date service received, but not knowing time service received

-----  
Ref3\_ServCameFor4 Referral 3: Service 4 Came For  
-----

type: numeric (int)  
label: Service

range: [1000,1000] units: 1  
unique values: 1 missing .: 3961/4168

unique mv codes: 2 missing .\*: 205/4168

| tabulation: | Freq. | Numeric | Label                                |
|-------------|-------|---------|--------------------------------------|
|             | 2     | 1000    | 1000. NO ADDITIONAL SERVICE          |
|             | 3961  | .       | .                                    |
|             | 205   | .j      | .j. Ineligible: External site client |

-----  
Ref3\_ServRecv4 Referral 3: Service 4 Received  
-----

type: numeric (int)  
label: Service

range: [1000,1000] units: 1000  
unique values: 1 missing .: 3962/4168  
unique mv codes: 2 missing .\*: 205/4168

| tabulation: | Freq. | Numeric | Label                                |
|-------------|-------|---------|--------------------------------------|
|             | 1     | 1000    | 1000. NO ADDITIONAL SERVICE          |
|             | 3962  | .       | .                                    |
|             | 205   | .j      | .j. Ineligible: External site client |

-----  
Ref3\_DateServRec4 Referral 3: Date Service 4 Received  
-----

type: numeric daily date (int)

range: [19806,19806] units: 1  
or equivalently: [24mar2014,24mar2014] units: days  
unique values: 1 missing .: 3962/4168  
unique mv codes: 2 missing .\*: 205/4168

| tabulation: | Freq. | Value           |
|-------------|-------|-----------------|
|             | 1     | 19806 24mar2014 |
|             | 3962  | .               |
|             | 205   | .j              |

-----  
Ref3\_ServDate4\_sys Referral 3: System Date Service 4 Received  
-----

type: numeric (byte)

range: [.,.] units: .  
unique values: 0 missing .: 3963/4168  
unique mv codes: 2 missing .\*: 205/4168

| tabulation: | Freq. | Value |
|-------------|-------|-------|
|             | 3963  | .     |
|             | 205   | .j    |

Ref3\_ServDate4\_sys:

1. some missing due to correcting date service received, but not knowing time service received

-----  
Ref3\_ServCameFor5 Referral 3: Service 5 Came For  
-----

type: numeric (int)  
label: Service

range: [1000,1000] units: 1  
unique values: 1 missing .: 3961/4168  
unique mv codes: 2 missing .\*: 205/4168



```

tabulation: Freq.  Numeric  Label
              2      1000  1000. NO ADDITIONAL SERVICE
              3961      .
              205      .j  .j. Ineligible: External site
                               client

```

-----  
Ref3\_ServRecv5 Referral 3: Service 5 Received  
-----

```

type: numeric (int)
label: Service

range: [1000,1000]          units: 1000
unique values: 1           missing .: 3962/4168
unique mv codes: 2        missing .*: 205/4168

```

```

tabulation: Freq.  Numeric  Label
              1      1000  1000. NO ADDITIONAL SERVICE
              3962      .
              205      .j  .j. Ineligible: External site
                               client

```

-----  
Ref3\_DateServRec5 Referral 3: Date Service 5 Received  
-----

```

type: numeric daily date (int)

range: [19806,19806]          units: 1
or equivalently: [24mar2014,24mar2014]  units: days
unique values: 1           missing .: 3962/4168
unique mv codes: 2        missing .*: 205/4168

```

```

tabulation: Freq.  Value
              1  19806  24mar2014
              3962  .
              205  .j      .j

```

-----  
Ref3\_ServDate5\_sys Referral 3: System Date Service 5 Received  
-----

```

type: numeric (byte)

range: [.,.]          units: .
unique values: 0           missing .: 3963/4168
unique mv codes: 2        missing .*: 205/4168

```

```

tabulation: Freq.  Value
              3963  .
              205  .j

```

Ref3\_ServDate5\_sys:  
1. some missing due to correcting date service received, but not knowing time service received

-----  
Ref4\_ID Referral 4 ID  
-----

```

type: numeric (long)

range: [282,99195]          units: 1
unique values: 123         missing .: 3840/4168
unique mv codes: 2        missing .*: 205/4168

mean: 94656.2
std. dev: 14769.5

```

```
percentiles:          10%          25%          50%          75%          90%
                   99002        99037        99087        99145        99171
```

Ref4\_ID:

1. if begins with 99, referral created for analysis

---

Ref4\_Source\_an Referral 4 Source

---

```
type: numeric (byte)
label: RefSource
```

```
range: [1,2]                    units: 1
unique values: 2                 missing .: 3840/4168
unique mv codes: 2              missing .*: 205/4168
```

```
tabulation: Freq.  Numeric  Label
              121        1    1. Registration
               2         2    2. Other Referral
            3840         .
            205         .j   .j. Ineligible: External site
                             client
```

Ref4\_Source\_an:

1. created for analysis

---

Ref4\_ParentID Referral 4 Parent ID: RegID or RefID

---

```
type: numeric (long)
```

```
range: [273,71369]             units: 1
unique values: 123             missing .: 3840/4168
unique mv codes: 2            missing .*: 205/4168
```

```
mean: 54143.4
std. dev: 12050.4
```

```
percentiles:          10%          25%          50%          75%          90%
                   51077        51281        51602        56545        70055
```

---

Ref4\_Self\_an Referral 4 for Respondent

---

```
type: numeric (byte)
label: yesno
```

```
range: [0,1]                    units: 1
unique values: 2                 missing .: 3840/4168
unique mv codes: 2              missing .*: 205/4168
```

```
tabulation: Freq.  Numeric  Label
              117        0    0. No
               6         1    1. Yes
            3840         .
            205         .j   .j. Ineligible: External site
                             client
```

Ref4\_Self\_an:

1. created for analysis

---

Ref4\_Partner\_an Referral 4 for Respondent's Partner

---

```
type: numeric (byte)
label: yesno
```

range: [0,1] units: 1  
unique values: 2 missing .: 3840/4168  
unique mv codes: 2 missing .\*: 205/4168

| tabulation: | Freq. | Numeric | Label                                |
|-------------|-------|---------|--------------------------------------|
|             | 18    | 0       | 0. No                                |
|             | 105   | 1       | 1. Yes                               |
|             | 3840  | .       |                                      |
|             | 205   | .j      | .j. Ineligible: External site client |

Ref4\_Partner\_an:  
1. created for analysis

-----  
Ref4\_Other\_an Referral 4 for Other  
-----

type: numeric (byte)  
label: yesno

range: [0,1] units: 1  
unique values: 2 missing .: 3840/4168  
unique mv codes: 2 missing .\*: 205/4168

| tabulation: | Freq. | Numeric | Label                                |
|-------------|-------|---------|--------------------------------------|
|             | 111   | 0       | 0. No                                |
|             | 12    | 1       | 1. Yes                               |
|             | 3840  | .       |                                      |
|             | 205   | .j      | .j. Ineligible: External site client |

Ref4\_Other\_an:  
1. created for analysis

-----  
Ref4\_PersID Referral 4 Given To: Respondent or Person Accompanying  
-----

type: numeric (byte)  
label: RefPersID

range: [0,0] units: 1  
unique values: 1 missing .: 3840/4168  
unique mv codes: 2 missing .\*: 205/4168

| tabulation: | Freq. | Numeric | Label                                |
|-------------|-------|---------|--------------------------------------|
|             | 123   | 0       | 0. Respondent                        |
|             | 3840  | .       |                                      |
|             | 205   | .j      | .j. Ineligible: External site client |

-----  
Ref4\_Date Referral 4: Date Given  
-----

type: numeric daily date (int)

range: [19715,19928] units: 1  
or equivalently: [23dec2013,24jul2014] units: days  
unique values: 67 missing .: 3840/4168  
unique mv codes: 2 missing .\*: 205/4168

mean: 19817.7 = 04apr2014 (+ 17 hours)  
std. dev: 44.7929

| percentiles: | 10%       | 25%       | 50%       | 75%       | 90%       |
|--------------|-----------|-----------|-----------|-----------|-----------|
|              | 19766     | 19787     | 19810     | 19851     | 19885     |
|              | 12feb2014 | 05mar2014 | 28mar2014 | 08may2014 | 11jun2014 |

-----  
Ref4\_ReferralFOR

Referral 4 For: Relationship to RefPersID\_Ref4  
-----

type: numeric (byte)  
label: relation

range: [0,12] units: 1  
unique values: 4 missing .: 3840/4168  
unique mv codes: 2 missing .\*: 205/4168

| tabulation: | Freq. | Numeric | Label                                |
|-------------|-------|---------|--------------------------------------|
|             | 6     | 0       | 0. SELF                              |
|             | 104   | 1       | 1. SPOUSE                            |
|             | 1     | 2       | 2. COHABITATING PARTNER              |
|             | 12    | 12      | 12. OTHER NON-RELATIVE               |
|             | 3840  | .       | .                                    |
|             | 205   | .j      | .j. Ineligible: External site client |

-----  
Ref4\_FromSite

Referral 4 from Site  
-----

type: numeric (byte)  
label: site

range: [2,11] units: 1  
unique values: 5 missing .: 3840/4168  
unique mv codes: 2 missing .\*: 205/4168

| tabulation: | Freq. | Numeric | Label                                    |
|-------------|-------|---------|------------------------------------------|
|             | 87    | 2       | 2. Chawama Clinic - MCH                  |
|             | 1     | 4       | 4. Chawama Clinic - TB, STI & HIV Clinic |
|             | 30    | 6       | 6. Kapata Urban Clinic, MCH              |
|             | 2     | 8       | 8. Chipata Gen Hosp - OP VMMC            |
|             | 3     | 11      | 11. SFH New Start                        |
|             | 3840  | .       | .                                        |
|             | 205   | .j      | .j. Ineligible: External site client     |

-----  
Ref4\_ToSite

Referral 4 to Site  
-----

type: numeric (byte)  
label: site

range: [3,13] units: 1  
unique values: 7 missing .: 3840/4168  
unique mv codes: 2 missing .\*: 205/4168

| tabulation: | Freq. | Numeric | Label                                       |
|-------------|-------|---------|---------------------------------------------|
|             | 84    | 3       | 3. Chawama Clinic - Out Patient Ward (VMMC) |
|             | 4     | 4       | 4. Chawama Clinic - TB, STI & HIV Clinic    |
|             | 8     | 7       | 7. Kapata Urban Clinic, TB, STI & HIV       |
|             | 1     | 9       | 9. Chipata Gen Hosp - MCH                   |
|             | 7     | 10      | 10. Chipata Gen Hosp - TB, STI & HIV        |
|             | 18    | 11      | 11. SFH New Start                           |
|             | 1     | 13      | 13. SFH VMMC                                |
|             | 3840  | .       | .                                           |
|             | 205   | .j      | .j. Ineligible: External site client        |

-----  
Ref4\_ServiceFor

Referral 4 for Service  
-----

type: numeric (byte)  
label: Service

range: [1,15] units: 1  
unique values: 6 missing .: 3840/4168  
unique mv codes: 2 missing .\*: 205/4168

| tabulation: | Freq. | Numeric | Label                                   |
|-------------|-------|---------|-----------------------------------------|
|             | 1     | 1       | 1. CCS: CERVICAL CANCER<br>SCREENING    |
|             | 112   | 6       | 6. HIV: HTC - COUPLES                   |
|             | 2     | 7       | 7. HIV: HTC - INDIVIDUAL                |
|             | 4     | 9       | 9. HIV: CD4 TESTING                     |
|             | 1     | 12      | 12. STI: ASSESSMENT                     |
|             | 3     | 15      | 15. VMMC: PROCEDURE                     |
|             | 3840  | .       |                                         |
|             | 205   | .j      | .j. Ineligible: External site<br>client |

Ref4\_ServiceFor:

1. Those who received referrals for couples HTC were coded in a specific manner based on the services they received prior. - If a respondent had received individual HTC, VMMC counseling or VMMC procedure prior to receiving the referral for couples HTC, s/he received one referral for couples HTC for his/her spouse or partner. - If a respondent did not receive individual HTC, VMMC counseling or VMMC procedure prior to receiving his/her referral for couples HTC, s/he received two referrals for couples HTC: one for self and one for spouse or partner.

-----  
Ref4\_ShowDate

Referral 4: Date Return to Act On Referral  
-----

type: numeric daily date (byte)

range: [.,.] units: .  
or equivalently: [.,.] units: days  
unique values: 0 missing .: 3963/4168  
unique mv codes: 2 missing .\*: 205/4168

| tabulation: | Freq. | Value |
|-------------|-------|-------|
|             | 3963  | .     |
|             | 205   | .j    |

-----  
Ref4\_ShowHMM

Referral 4: Time Return to Act On Referral  
-----

type: string (str1), but longest is str0

unique values: 0 missing "": 4168/4168

| tabulation: | Freq. | Value |
|-------------|-------|-------|
|             | 4168  | " "   |

-----  
Ref4\_ServDate

Referral 4: Date Services Received  
-----

type: numeric daily date (byte)

range: [.,.] units: .  
or equivalently: [.,.] units: days  
unique values: 0 missing .: 3963/4168  
unique mv codes: 2 missing .\*: 205/4168

| tabulation: | Freq. | Value |
|-------------|-------|-------|
|-------------|-------|-------|

3963 .  
205 .j .j

-----  
Ref4\_ServHMM

Referral 4: Time Services Received  
-----

type: string (str1), but longest is str0  
unique values: 0 missing "": 4168/4168  
tabulation: Freq. Value  
4168 ""

Ref4\_ServHMM:

1. some missing due to correcting date service received, but not knowing time service received

-----  
Ref4\_Counseling

Referral 4: Counseling Received  
-----

type: numeric (byte)  
label: Counseling  
range: [.,.] units: .  
unique values: 0 missing .: 3963/4168  
unique mv codes: 2 missing .\*: 205/4168  
tabulation: Freq. Numeric Label  
3963 .  
205 .j .j. Ineligible: External site  
client

-----  
Ref4\_ReceivedDayReturned

Referral 4: Services Received Same Day Returned  
-----

type: numeric (byte)  
label: yesno  
range: [.,.] units: .  
unique values: 0 missing .: 3963/4168  
unique mv codes: 2 missing .\*: 205/4168  
tabulation: Freq. Numeric Label  
3963 .  
205 .j .j. Ineligible: External site  
client

Ref4\_ReceivedDayReturned:

1. Yes if Date showed up for services = Date services received  
(Ref1\_ShowDate=Ref1\_ServDate)

-----  
Ref4\_Escort

Referral 4: Escort Provided  
-----

type: numeric (byte)  
label: Ref4\_Escort  
range: [.,.] units: .  
unique values: 0 missing .: 0/4168  
unique mv codes: 4 missing .\*: 4168/4168  
tabulation: Freq. Numeric Label  
2642 .a .a. Not in integrated arm  
1264 .b .b. No referral  
57 .d .d. Have not yet received  
services from referral

205 .j .j. Ineligible: External site  
client

-----  
Ref4\_EscortTime Referral 4: Time Escort Provided  
-----

type: string (str1), but longest is str0  
unique values: 0 missing "": 4168/4168  
tabulation: Freq. Value  
4168 ""

-----  
Ref4\_VoucherNumber Referral 4 Voucher Number  
-----

type: string (str10)  
unique values: 123 missing "": 4045/4168  
examples: ""  
""  
""  
""

Ref4\_VoucherNumber:  
1. if begins with 99, referral created for analysis

-----  
Ref4\_ServCameFor1 Referral 4: Service 1 Came For  
-----

type: numeric (byte)  
label: Service  
range: [.,.] units: .  
unique values: 0 missing .: 3963/4168  
unique mv codes: 2 missing .\*: 205/4168  
tabulation: Freq. Numeric Label  
3963 .  
205 .j .j. Ineligible: External site  
client

-----  
Ref4\_ServRecv1 Referral 4: Service 1 Received  
-----

type: numeric (byte)  
label: Service  
range: [.,.] units: .  
unique values: 0 missing .: 3963/4168  
unique mv codes: 2 missing .\*: 205/4168  
tabulation: Freq. Numeric Label  
3963 .  
205 .j .j. Ineligible: External site  
client

-----  
Ref4\_DateServRec1 Referral 4: Date Service 1 Received  
-----

type: numeric daily date (byte)  
range: [.,.] units: .  
or equivalently: [.,.] units: days

unique values: 0 missing .: 3963/4168  
unique mv codes: 2 missing .\*: 205/4168

tabulation: Freq. Value  
3963 .  
205 .j .j

-----  
Ref4\_ServDate1\_sys Referral 4: System Date Service 1 Received  
-----

type: numeric (byte)

range: [.,.] units: .  
unique values: 0 missing .: 3963/4168  
unique mv codes: 2 missing .\*: 205/4168

tabulation: Freq. Value  
3963 .  
205 .j

Ref4\_ServDate1\_sys:

1. some missing due to correcting date service received, but not knowing time service received

-----  
Ref4\_ServCameFor2 Referral 4: Service 2 Came For  
-----

type: numeric (byte)  
label: Service

range: [.,.] units: .  
unique values: 0 missing .: 3963/4168  
unique mv codes: 2 missing .\*: 205/4168

tabulation: Freq. Numeric Label  
3963 .  
205 .j .j. Ineligible: External site  
client

-----  
Ref4\_ServRecv2 Referral 4: Service 2 Received  
-----

type: numeric (byte)  
label: Service

range: [.,.] units: .  
unique values: 0 missing .: 3963/4168  
unique mv codes: 2 missing .\*: 205/4168

tabulation: Freq. Numeric Label  
3963 .  
205 .j .j. Ineligible: External site  
client

-----  
Ref4\_DateServRec2 Referral 4: Date Service 2 Received  
-----

type: numeric daily date (byte)

range: [.,.] units: .  
or equivalently: [.,.] units: days  
unique values: 0 missing .: 3963/4168  
unique mv codes: 2 missing .\*: 205/4168

tabulation: Freq. Value  
3963 .



-----  
Ref4\_ServDate2\_sys Referral 4: System Date Service 2 Received  
-----

type: numeric (byte)  
range: [.,.] units: .  
unique values: 0 missing .: 3963/4168  
unique mv codes: 2 missing .\*: 205/4168  
tabulation: Freq. Value  
3963 .  
205 .j

Ref4\_ServDate2\_sys:  
1. some missing due to correcting date service received, but not knowing time service received

-----  
Ref4\_ServCameFor3 Referral 4: Service 3 Came For  
-----

type: numeric (byte)  
label: Service  
range: [.,.] units: .  
unique values: 0 missing .: 3963/4168  
unique mv codes: 2 missing .\*: 205/4168  
tabulation: Freq. Numeric Label  
3963 .  
205 .j .j. Ineligible: External site client

-----  
Ref4\_ServRecv3 Referral 4: Service 3 Received  
-----

type: numeric (byte)  
label: Service  
range: [.,.] units: .  
unique values: 0 missing .: 3963/4168  
unique mv codes: 2 missing .\*: 205/4168  
tabulation: Freq. Numeric Label  
3963 .  
205 .j .j. Ineligible: External site client

-----  
Ref4\_DateServRec3 Referral 4: Date Service 3 Received  
-----

type: numeric daily date (byte)  
range: [.,.] units: .  
or equivalently: [.,.] units: days  
unique values: 0 missing .: 3963/4168  
unique mv codes: 2 missing .\*: 205/4168  
tabulation: Freq. Value  
3963 .  
205 .j .j

-----  
Ref4\_ServDate3\_sys Referral 4: System Date Service 3 Received  
-----

```

type: numeric (byte)

range: [.,.] units: .
unique values: 0 missing .: 3963/4168
unique mv codes: 2 missing .*: 205/4168

```

```

tabulation: Freq. Value
             3963 .
             205 .j

```

Ref4\_ServDate3\_sys:

1. some missing due to correcting date service received, but not knowing time service received

-----  
Ref4\_ServCameFor4 Referral 4: Service 4 Came For  
-----

```

type: numeric (byte)
label: Service

range: [.,.] units: .
unique values: 0 missing .: 3963/4168
unique mv codes: 2 missing .*: 205/4168

```

```

tabulation: Freq. Numeric Label
             3963 .
             205 .j .j. Ineligible: External site
                    client

```

-----  
Ref4\_ServRecv4 Referral 4: Service 4 Received  
-----

```

type: numeric (byte)
label: Service

range: [.,.] units: .
unique values: 0 missing .: 3963/4168
unique mv codes: 2 missing .*: 205/4168

```

```

tabulation: Freq. Numeric Label
             3963 .
             205 .j .j. Ineligible: External site
                    client

```

-----  
Ref4\_DateServRec4 Referral 4: Date Service 4 Received  
-----

```

type: numeric daily date (byte)

range: [.,.] units: .
or equivalently: [.,.] units: days
unique values: 0 missing .: 3963/4168
unique mv codes: 2 missing .*: 205/4168

```

```

tabulation: Freq. Value
             3963 .
             205 .j .j

```

-----  
Ref4\_ServDate4\_sys Referral 4: System Date Service 4 Received  
-----

```

type: numeric (byte)

range: [.,.] units: .
unique values: 0 missing .: 3963/4168

```

unique mv codes: 2 missing .\*: 205/4168

tabulation: Freq. Value  
3963 .  
205 .j

Ref4\_ServDate4\_sys:

1. some missing due to correcting date service received, but not knowing time service received

-----  
Ref4\_ServCameFor5 Referral 4: Service 5 Came For  
-----

type: numeric (byte)  
label: Service

range: [,..] units: .  
unique values: 0 missing .: 3963/4168  
unique mv codes: 2 missing .\*: 205/4168

tabulation: Freq. Numeric Label  
3963 .  
205 .j .j. Ineligible: External site  
client

-----  
Ref4\_ServRecv5 Referral 4: Service 5 Received  
-----

type: numeric (byte)  
label: Service

range: [,..] units: .  
unique values: 0 missing .: 3963/4168  
unique mv codes: 2 missing .\*: 205/4168

tabulation: Freq. Numeric Label  
3963 .  
205 .j .j. Ineligible: External site  
client

-----  
Ref4\_DateServRec5 Referral 4: Date Service 5 Received  
-----

type: numeric daily date (byte)

range: [,..] units: .  
or equivalently: [,..] units: days  
unique values: 0 missing .: 3963/4168  
unique mv codes: 2 missing .\*: 205/4168

tabulation: Freq. Value  
3963 .  
205 .j .j

-----  
Ref4\_ServDate5\_sys Referral 4: System Date Service 5 Received  
-----

type: numeric (byte)

range: [,..] units: .  
unique values: 0 missing .: 3963/4168  
unique mv codes: 2 missing .\*: 205/4168

tabulation: Freq. Value  
3963 .  
205 .j

Ref4\_ServDate5\_sys:

1. some missing due to correcting date service received, but not knowing time service received

-----  
Ref5\_ID Referral 5 ID  
-----

type: numeric (long)  
range: [99014,99066] units: 1  
unique values: 2 missing .: 3961/4168  
unique mv codes: 2 missing .\*: 205/4168

tabulation: Freq. Value  
                  1 99014  
                  1 99066  
                  3961 .  
                  205 .j

Ref5\_ID:

1. if begins with 99, referral created for analysis

-----  
Ref5\_Source\_an Referral 5 Source  
-----

type: numeric (byte)  
label: RefSource  
range: [1,1] units: 1  
unique values: 1 missing .: 3961/4168  
unique mv codes: 2 missing .\*: 205/4168

tabulation: Freq. Numeric Label  
                  2 1 1. Registration  
                  3961 .  
                  205 .j .j. Ineligible: External site  
                                  client

Ref5\_Source\_an:

1. created for analysis

-----  
Ref5\_ParentID Referral 5 Parent ID: RegID or RefID  
-----

type: numeric (long)  
range: [51050,51441] units: 1  
unique values: 2 missing .: 3961/4168  
unique mv codes: 2 missing .\*: 205/4168

tabulation: Freq. Value  
                  1 51050  
                  1 51441  
                  3961 .  
                  205 .j

-----  
Ref5\_Self\_an Referral 5 for Respondent  
-----

type: numeric (byte)  
label: yesno  
range: [0,0] units: 1  
unique values: 1 missing .: 3961/4168  
unique mv codes: 2 missing .\*: 205/4168

```

tabulation: Freq. Numeric Label
              2          0 0. No
            3961          .
            205          .j .j. Ineligible: External site
                                client

```

```

Ref5_Self_an:
  1. created for analysis

```

-----  
Ref5\_Partner\_an Referral 5 for Respondent's Partner  
-----

```

      type: numeric (byte)
      label: yesno

      range: [1,1]                units: 1
unique values: 1                missing .: 3961/4168
unique mv codes: 2              missing .*: 205/4168

```

```

tabulation: Freq. Numeric Label
              2          1 1. Yes
            3961          .
            205          .j .j. Ineligible: External site
                                client

```

```

Ref5_Partner_an:
  1. created for analysis

```

-----  
Ref5\_Other\_an Referral 5 for Other  
-----

```

      type: numeric (byte)
      label: yesno

      range: [0,0]                units: 1
unique values: 1                missing .: 3961/4168
unique mv codes: 2              missing .*: 205/4168

```

```

tabulation: Freq. Numeric Label
              2          0 0. No
            3961          .
            205          .j .j. Ineligible: External site
                                client

```

```

Ref5_Other_an:
  1. created for analysis

```

-----  
Ref5\_PersID Referral 5 Given To: Respondent or Person Accompanying  
-----

```

      type: numeric (byte)
      label: RefPersID

      range: [0,0]                units: 1
unique values: 1                missing .: 3961/4168
unique mv codes: 2              missing .*: 205/4168

```

```

tabulation: Freq. Numeric Label
              2          0 0. Respondent
            3961          .
            205          .j .j. Ineligible: External site
                                client

```

-----  
Ref5\_Date Referral 5: Date Given  
-----

```

type: numeric daily date (int)

range: [19761,19808]          units: 1
or equivalently: [07feb2014,26mar2014]  units: days
unique values: 2              missing .: 3961/4168
unique mv codes: 2            missing .*: 205/4168

```

```

tabulation: Freq. Value
              1 19761 07feb2014
              1 19808 26mar2014
            3961 .
            205 .j

```

-----  
Ref5\_ReferralFOR Referral 5 For: Relationship to RefPersID\_Ref5  
-----

```

type: numeric (byte)
label: relation

range: [1,1]          units: 1
unique values: 1      missing .: 3961/4168
unique mv codes: 2    missing .*: 205/4168

```

```

tabulation: Freq. Numeric Label
              2          1 1. SPOUSE
            3961 .
            205 .j .j. Ineligible: External site
                    client

```

-----  
Ref5\_FromSite Referral 5 from Site  
-----

```

type: numeric (byte)
label: site

range: [2,2]          units: 1
unique values: 1      missing .: 3961/4168
unique mv codes: 2    missing .*: 205/4168

```

```

tabulation: Freq. Numeric Label
              2          2 2. Chawama Clinic - MCH
            3961 .
            205 .j .j. Ineligible: External site
                    client

```

-----  
Ref5\_ToSite Referral 5 to Site  
-----

```

type: numeric (byte)
label: site

range: [3,3]          units: 1
unique values: 1      missing .: 3961/4168
unique mv codes: 2    missing .*: 205/4168

```

```

tabulation: Freq. Numeric Label
              2          3 3. Chawama Clinic - Out Patient
                    Ward (VMMC)
            3961 .
            205 .j .j. Ineligible: External site
                    client

```

-----  
Ref5\_ServiceFor Referral 5 for Service  
-----

```

type: numeric (byte)
label: Service

range: [6,6] units: 1
unique values: 1 missing .: 3961/4168
unique mv codes: 2 missing .*: 205/4168

```

```

tabulation: Freq. Numeric Label
              2          6 6. HIV: HTC - COUPLES
              3961         .
              205         .j .j. Ineligible: External site
                               client

```

Ref5\_ServiceFor:

- Those who received referrals for couples HTC were coded in a specific manner based on the services they received prior. - If a respondent had received individual HTC, VMMC counseling or VMMC procedure prior to receiving the referral for couples HTC, s/he received one referral for couples HTC for his/her spouse or partner. - If a respondent did not receive individual HTC, VMMC counseling or VMMC procedure prior to receiving his/her referral for couples HTC, s/he received two referrals for couples HTC: one for self and one for spouse or partner.

-----  
Ref5\_ShowDate Referral 5: Date Return to Act On Referral  
-----

```

type: numeric daily date (byte)

range: [.,.] units: .
or equivalently: [.,.] units: days
unique values: 0 missing .: 3963/4168
unique mv codes: 2 missing .*: 205/4168

```

```

tabulation: Freq. Value
              3963 .
              205 .j .j

```

-----  
Ref5\_ShowHMM Referral 5: Time Return to Act On Referral  
-----

```

type: string (str1), but longest is str0
unique values: 0 missing "": 4168/4168

```

```

tabulation: Freq. Value
              4168 ""

```

-----  
Ref5\_ServDate Referral 5: Date Services Received  
-----

```

type: numeric daily date (byte)

range: [.,.] units: .
or equivalently: [.,.] units: days
unique values: 0 missing .: 3963/4168
unique mv codes: 2 missing .*: 205/4168

```

```

tabulation: Freq. Value
              3963 .
              205 .j .j

```

-----  
Ref5\_ServHMM Referral 5: Time Services Received  
-----

```

type: string (str1), but longest is str0
unique values: 0 missing "": 4168/4168

```

tabulation: Freq. Value  
4168 ""

Ref5\_ServHMM:

1. some missing due to correcting date service received, but not knowing time service received

-----  
Ref5\_Counseling Referral 5: Counseling Received  
-----

type: numeric (byte)  
label: Counseling

range: [.,.] units: .  
unique values: 0 missing .: 3963/4168  
unique mv codes: 2 missing .\*: 205/4168

tabulation: Freq. Numeric Label  
3963 .  
205 .j .j. Ineligible: External site  
client

-----  
Ref5\_ReceivedDayReturned Referral 5: Services Received Same Day Returned  
-----

type: numeric (byte)  
label: yesno

range: [.,.] units: .  
unique values: 0 missing .: 3963/4168  
unique mv codes: 2 missing .\*: 205/4168

tabulation: Freq. Numeric Label  
3963 .  
205 .j .j. Ineligible: External site  
client

Ref5\_ReceivedDayReturned:

1. Yes if Date showed up for services = Date services received  
(Ref1\_ShowDate=Ref1\_ServDate)

-----  
Ref5\_Escort Referral 5: Escort Provided  
-----

type: numeric (byte)  
label: Ref5\_Escort

range: [.,.] units: .  
unique values: 0 missing .: 0/4168  
unique mv codes: 4 missing .\*: 4168/4168

tabulation: Freq. Numeric Label  
2642 .a .a. Not in integrated arm  
1320 .b .b. No referral  
1 .d .d. Have not yet received  
services from referral  
205 .j .j. Ineligible: External site  
client

-----  
Ref5\_EscortTime Referral 5: Time Escort Provided  
-----

type: string (str1), but longest is str0  
unique values: 0 missing "": 4168/4168



tabulation: Freq. Value  
4168 ""

-----  
Ref5\_VoucherNumber Referral 5 Voucher Number  
-----

type: string (str10)  
unique values: 2 missing "": 4166/4168

tabulation: Freq. Value  
4166 ""  
1 "99-03-0099"  
1 "99-03-0278"

Ref5\_VoucherNumber:  
1. if begins with 99, referral created for analysis

-----  
Ref5\_ServCameFor1 Referral 5: Service 1 Came For  
-----

type: numeric (byte)  
label: Service  
range: [.,.] units: .  
unique values: 0 missing .: 3963/4168  
unique mv codes: 2 missing .\*: 205/4168

tabulation: Freq. Numeric Label  
3963 .  
205 .j .j. Ineligible: External site  
client

-----  
Ref5\_ServRecv1 Referral 5: Service 1 Received  
-----

type: numeric (byte)  
label: Service  
range: [.,.] units: .  
unique values: 0 missing .: 3963/4168  
unique mv codes: 2 missing .\*: 205/4168

tabulation: Freq. Numeric Label  
3963 .  
205 .j .j. Ineligible: External site  
client

-----  
Ref5\_DateServRec1 Referral 5: Date Service 1 Received  
-----

type: numeric daily date (byte)  
range: [.,.] units: .  
or equivalently: [.,.] units: days  
unique values: 0 missing .: 3963/4168  
unique mv codes: 2 missing .\*: 205/4168

tabulation: Freq. Value  
3963 .  
205 .j .j

-----  
Ref5\_ServDate1\_sys Referral 5: System Date Service 1 Received  
-----

```

type: numeric (byte)

range: [.,.] units: .
unique values: 0 missing .: 3963/4168
unique mv codes: 2 missing .*: 205/4168

```

```

tabulation: Freq. Value
             3963 .
             205 .j

```

Ref5\_ServDate1\_sys:

1. some missing due to correcting date service received, but not knowing time service received

-----  
Ref5\_ServCameFor2 Referral 5: Service 2 Came For  
-----

```

type: numeric (byte)
label: Service

range: [.,.] units: .
unique values: 0 missing .: 3963/4168
unique mv codes: 2 missing .*: 205/4168

```

```

tabulation: Freq. Numeric Label
             3963 .
             205 .j .j. Ineligible: External site
                    client

```

-----  
Ref5\_ServRecv2 Referral 5: Service 2 Received  
-----

```

type: numeric (byte)
label: Service

range: [.,.] units: .
unique values: 0 missing .: 3963/4168
unique mv codes: 2 missing .*: 205/4168

```

```

tabulation: Freq. Numeric Label
             3963 .
             205 .j .j. Ineligible: External site
                    client

```

-----  
Ref5\_DateServRec2 Referral 5: Date Service 2 Received  
-----

```

type: numeric daily date (byte)

range: [.,.] units: .
or equivalently: [.,.] units: days
unique values: 0 missing .: 3963/4168
unique mv codes: 2 missing .*: 205/4168

```

```

tabulation: Freq. Value
             3963 .
             205 .j .j

```

-----  
Ref5\_ServDate2\_sys Referral 5: System Date Service 2 Received  
-----

```

type: numeric (byte)

range: [.,.] units: .
unique values: 0 missing .: 3963/4168

```

unique mv codes: 2 missing .\*: 205/4168

tabulation: Freq. Value  
3963 .  
205 .j

Ref5\_ServDate2\_sys:

1. some missing due to correcting date service received, but not knowing time service received

-----  
Ref5\_ServCameFor3 Referral 5: Service 3 Came For  
-----

type: numeric (byte)  
label: Service

range: [,..] units: .  
unique values: 0 missing .: 3963/4168  
unique mv codes: 2 missing .\*: 205/4168

tabulation: Freq. Numeric Label  
3963 .  
205 .j .j. Ineligible: External site  
client

-----  
Ref5\_ServRecv3 Referral 5: Service 3 Received  
-----

type: numeric (byte)  
label: Service

range: [,..] units: .  
unique values: 0 missing .: 3963/4168  
unique mv codes: 2 missing .\*: 205/4168

tabulation: Freq. Numeric Label  
3963 .  
205 .j .j. Ineligible: External site  
client

-----  
Ref5\_DateServRec3 Referral 5: Date Service 3 Received  
-----

type: numeric daily date (byte)

range: [,..] units: .  
or equivalently: [,..] units: days  
unique values: 0 missing .: 3963/4168  
unique mv codes: 2 missing .\*: 205/4168

tabulation: Freq. Value  
3963 .  
205 .j .j

-----  
Ref5\_ServDate3\_sys Referral 5: System Date Service 3 Received  
-----

type: numeric (byte)

range: [,..] units: .  
unique values: 0 missing .: 3963/4168  
unique mv codes: 2 missing .\*: 205/4168

tabulation: Freq. Value  
3963 .  
205 .j

Ref5\_ServDate3\_sys:

1. some missing due to correcting date service received, but not knowing time service received

-----  
 Ref5\_ServCameFor4

Referral 5: Service 4 Came For  
 -----

```

    type: numeric (byte)
    label: Service

    range: [.,.]
    unique values: 0
    unique mv codes: 2

    units: .
    missing .: 3963/4168
    missing .*: 205/4168

    tabulation: Freq.  Numeric  Label
                 3963      .
                 205      .j  .j. Ineligible: External site
                        client
  
```

-----  
 Ref5\_ServRecv4

Referral 5: Service 4 Received  
 -----

```

    type: numeric (byte)
    label: Service

    range: [.,.]
    unique values: 0
    unique mv codes: 2

    units: .
    missing .: 3963/4168
    missing .*: 205/4168

    tabulation: Freq.  Numeric  Label
                 3963      .
                 205      .j  .j. Ineligible: External site
                        client
  
```

-----  
 Ref5\_DateServRec4

Referral 5: Date Service 4 Received  
 -----

```

    type: numeric daily date (byte)

    range: [.,.]
    or equivalently: [.,.]
    unique values: 0
    unique mv codes: 2

    units: .
    units: days
    missing .: 3963/4168
    missing .*: 205/4168

    tabulation: Freq.  Value
                 3963  .
                 205  .j  .j
  
```

-----  
 Ref5\_ServDate4\_sys

Referral 5: System Date Service 4 Received  
 -----

```

    type: numeric (byte)

    range: [.,.]
    unique values: 0
    unique mv codes: 2

    units: .
    missing .: 3963/4168
    missing .*: 205/4168

    tabulation: Freq.  Value
                 3963  .
                 205  .j
  
```

Ref5\_ServDate4\_sys:

1. some missing due to correcting date service received, but not knowing time service received

-----  
Ref5\_ServCameFor5 Referral 5: Service 5 Came For  
-----

type: numeric (byte)  
label: Service

range: [.,.] units: .  
unique values: 0 missing .: 3963/4168  
unique mv codes: 2 missing .\*: 205/4168

tabulation: Freq. Numeric Label  
3963 .  
205 .j .j. Ineligible: External site  
client

-----  
Ref5\_ServRecv5 Referral 5: Service 5 Received  
-----

type: numeric (byte)  
label: Service

range: [.,.] units: .  
unique values: 0 missing .: 3963/4168  
unique mv codes: 2 missing .\*: 205/4168

tabulation: Freq. Numeric Label  
3963 .  
205 .j .j. Ineligible: External site  
client

-----  
Ref5\_DateServRec5 Referral 5: Date Service 5 Received  
-----

type: numeric daily date (byte)

range: [.,.] units: .  
or equivalently: [.,.] units: days  
unique values: 0 missing .: 3963/4168  
unique mv codes: 2 missing .\*: 205/4168

tabulation: Freq. Value  
3963 . .  
205 .j .j

-----  
Ref5\_ServDate5\_sys Referral 5: System Date Service 5 Received  
-----

type: numeric (byte)

range: [.,.] units: .  
unique values: 0 missing .: 3963/4168  
unique mv codes: 2 missing .\*: 205/4168

tabulation: Freq. Value  
3963 .  
205 .j

Ref5\_ServDate5\_sys:  
1. some missing due to correcting date service received, but not knowing time service received

-----  
soc\_MedRecord Medical record availability  
-----

type: numeric (byte)

label: MedRecord

range: [0,1] units: 1  
 unique values: 2 missing .: 362/4168  
 unique mv codes: 3 missing .\*: 2849/4168

| tabulation: | Freq. | Numeric | Label                                       |
|-------------|-------|---------|---------------------------------------------|
|             | 107   | 0       | 0. Medical Record Not Located/Not Available |
|             | 850   | 1       | 1. Medical Record Found                     |
|             | 362   | .       | .                                           |
|             | 205   | .j      | .j. Ineligible: External site client        |
|             | 2644  | .1      | .1. Ineligible: Experimental Arm            |

-----  
 soc\_fRefTotal Number of referrals in facility records  
 -----

type: numeric (byte)

range: [0,1] units: 1  
 unique values: 2 missing .: 362/4168  
 unique mv codes: 3 missing .\*: 2849/4168

| tabulation: | Freq. | Value |
|-------------|-------|-------|
|             | 862   | 0     |
|             | 95    | 1     |
|             | 362   | .     |
|             | 205   | .j    |
|             | 2644  | .1    |

-----  
 soc\_fRefForm FRefForm  
 -----

type: numeric (byte)  
 label: fRefForm, but 2 nonmissing values are not labeled

range: [0,6] units: 1  
 unique values: 4 missing .: 1091/4168  
 unique mv codes: 3 missing .\*: 2849/4168

| tabulation: | Freq. | Numeric | Label                                |
|-------------|-------|---------|--------------------------------------|
|             | 47    | 0       |                                      |
|             | 78    | 1       | 1. Intake form                       |
|             | 102   | 3       | 3. Register                          |
|             | 1     | 6       |                                      |
|             | 1091  | .       | .                                    |
|             | 205   | .j      | .j. Ineligible: External site client |
|             | 2644  | .1      | .1. Ineligible: Experimental Arm     |

-----  
 soc\_fRef1\_ServiceFor Service referred for (report by facility records)  
 -----

type: numeric (byte)  
 label: fRef\_ServiceFor

range: [4,15] units: 1  
 unique values: 4 missing .: 1272/4168  
 unique mv codes: 3 missing .\*: 2849/4168

| tabulation: | Freq. | Numeric | Label             |
|-------------|-------|---------|-------------------|
|             | 5     | 4       | 4. FP             |
|             | 35    | 8       | 8. ART Screening  |
|             | 1     | 12      | 12. STI screening |
|             | 6     | 15      | 15. VMMC          |
|             | 1272  | .       | .                 |

205 .j .j. Ineligible: External site  
client  
2644 .1 .1. Ineligible: Experimental Arm

-----  
soc\_fRef1\_ToSite Service site referred to (report by facility records)  
-----

type: numeric (byte)  
label: fRef\_ToSite  
  
range: [7,14] units: 1  
unique values: 3 missing .: 1272/4168  
unique mv codes: 3 missing .\*: 2849/4168

| tabulation: | Freq. | Numeric | Label                                   |
|-------------|-------|---------|-----------------------------------------|
|             | 14    | 7       | 7. Kapata Clinic TB, STI, HIV           |
|             | 1     | 8       | 8. Chipata Gen Hosp VMMC                |
|             | 32    | 14      | 14. Other/Not specific                  |
|             | 1272  | .       | .                                       |
|             | 205   | .j      | .j. Ineligible: External site<br>client |
|             | 2644  | .1      | .1. Ineligible: Experimental Arm        |

-----  
soc\_fRef1\_Serv Service uptake (report by facility records)  
-----

type: numeric (byte)  
label: fRef\_Serv  
  
range: [0,0] units: 1  
unique values: 1 missing .: 1272/4168  
unique mv codes: 3 missing .\*: 2849/4168

| tabulation: | Freq. | Numeric | Label                                            |
|-------------|-------|---------|--------------------------------------------------|
|             | 47    | 0       | 0. No information on whether<br>accessed service |
|             | 1272  | .       | .                                                |
|             | 205   | .j      | .j. Ineligible: External site<br>client          |
|             | 2644  | .1      | .1. Ineligible: Experimental Arm                 |

-----  
soc\_fRef2\_ServiceFor Service referred for (report by facility records)  
-----

type: numeric (byte)  
label: fRef\_ServiceFor  
  
range: [4,12] units: 1  
unique values: 5 missing .: 1287/4168  
unique mv codes: 3 missing .\*: 2849/4168

| tabulation: | Freq. | Numeric | Label                                   |
|-------------|-------|---------|-----------------------------------------|
|             | 3     | 4       | 4. FP                                   |
|             | 24    | 8       | 8. ART Screening                        |
|             | 1     | 9       | 9. CD4 Screening                        |
|             | 1     | 10      | 10. Psychosocial counseling             |
|             | 3     | 12      | 12. STI screening                       |
|             | 1287  | .       | .                                       |
|             | 205   | .j      | .j. Ineligible: External site<br>client |
|             | 2644  | .1      | .1. Ineligible: Experimental Arm        |

-----  
soc\_fRef2\_ToSite Service site referred to (report by facility records)  
-----

type: numeric (byte)

label: fRef\_ToSite

range: [7,14] units: 1  
 unique values: 3 missing .: 1287/4168  
 unique mv codes: 3 missing .\*: 2849/4168

| tabulation: | Freq. | Numeric | Label                                |
|-------------|-------|---------|--------------------------------------|
|             | 17    | 7       | 7. Kapata Clinic TB, STI, HIV        |
|             | 4     | 8       | 8. Chipata Gen Hosp VMMC             |
|             | 11    | 14      | 14. Other/Not specific               |
|             | 1287  | .       | .                                    |
|             | 205   | .j      | .j. Ineligible: External site client |
|             | 2644  | .l      | .l. Ineligible: Experimental Arm     |

-----  
 soc\_fRef2\_Serv Service uptake (report by facility records)  
 -----

type: numeric (byte)  
 label: fRef\_Serv

range: [0,0] units: 1  
 unique values: 1 missing .: 1287/4168  
 unique mv codes: 3 missing .\*: 2849/4168

| tabulation: | Freq. | Numeric | Label                                         |
|-------------|-------|---------|-----------------------------------------------|
|             | 32    | 0       | 0. No information on whether accessed service |
|             | 1287  | .       | .                                             |
|             | 205   | .j      | .j. Ineligible: External site client          |
|             | 2644  | .l      | .l. Ineligible: Experimental Arm              |

-----  
 soc\_fRef3\_ServiceFor Service referred for (report by facility records)  
 -----

type: numeric (byte)  
 label: fRef\_ServiceFor

range: [4,15] units: 1  
 unique values: 3 missing .: 1303/4168  
 unique mv codes: 3 missing .\*: 2849/4168

| tabulation: | Freq. | Numeric | Label                                |
|-------------|-------|---------|--------------------------------------|
|             | 1     | 4       | 4. FP                                |
|             | 14    | 8       | 8. ART Screening                     |
|             | 1     | 15      | 15. VMMC                             |
|             | 1303  | .       | .                                    |
|             | 205   | .j      | .j. Ineligible: External site client |
|             | 2644  | .l      | .l. Ineligible: Experimental Arm     |

-----  
 soc\_fRef3\_ToSite Service site referred to (report by facility records)  
 -----

type: numeric (byte)  
 label: fRef\_ToSite

range: [7,14] units: 1  
 unique values: 2 missing .: 1303/4168  
 unique mv codes: 3 missing .\*: 2849/4168

| tabulation: | Freq. | Numeric | Label                         |
|-------------|-------|---------|-------------------------------|
|             | 8     | 7       | 7. Kapata Clinic TB, STI, HIV |
|             | 8     | 14      | 14. Other/Not specific        |
|             | 1303  | .       | .                             |
|             | 205   | .j      | .j. Ineligible: External site |



client  
2644 .1 .1. Ineligible: Experimental Arm

-----  
soc\_fRef3\_Serv Service uptake (report by facility records)  
-----

type: numeric (byte)  
label: fRef\_Serv  
  
range: [0,0] units: 1  
unique values: 1 missing .: 1303/4168  
unique mv codes: 3 missing .\*: 2849/4168

| tabulation: | Freq. | Numeric | Label                                         |
|-------------|-------|---------|-----------------------------------------------|
|             | 16    | 0       | 0. No information on whether accessed service |
|             | 1303  | .       |                                               |
|             | 205   | .j      | .j. Ineligible: External site client          |
|             | 2644  | .1      | .1. Ineligible: Experimental Arm              |

-----  
soc\_ClientContact Client contact attempt  
-----

type: numeric (byte)  
label: ClientContact  
  
range: [0,3] units: 1  
unique values: 4 missing .: 205/4168  
unique mv codes: 3 missing .\*: 2849/4168

| tabulation: | Freq. | Numeric | Label                                    |
|-------------|-------|---------|------------------------------------------|
|             | 6     | 0       | 0. No contact needed/attempted           |
|             | 516   | 1       | 1. Client contacted by phone             |
|             | 492   | 2       | 2. Client contacted in person            |
|             | 100   | 3       | 3. Client could not be located/contacted |
|             | 205   | .       |                                          |
|             | 205   | .j      | .j. Ineligible: External site client     |
|             | 2644  | .1      | .1. Ineligible: Experimental Arm         |

-----  
soc\_cRefTotal Number of referrals reported by client  
-----

type: numeric (byte)  
  
range: [0,3] units: 1  
unique values: 4 missing .: 205/4168  
unique mv codes: 3 missing .\*: 2849/4168

| tabulation: | Freq. | Value |
|-------------|-------|-------|
|             | 370   | 0     |
|             | 229   | 1     |
|             | 280   | 2     |
|             | 235   | 3     |
|             | 205   | .     |
|             | 205   | .j    |
|             | 2644  | .1    |

-----  
soc\_cRef1\_ServiceFor Service referred for (report by client)  
-----

type: numeric (byte)  
label: cRef\_ServiceFor

```

range: [0,15] units: 1
unique values: 9 missing .: 576/4168
unique mv codes: 3 missing .*: 2849/4168

```

| tabulation: | Freq. | Numeric | Label                                |
|-------------|-------|---------|--------------------------------------|
|             | 1     | 0       | 0. Other                             |
|             | 219   | 1       | 1. Cervical Cancer Screening         |
|             | 45    | 4       | 4. FP                                |
|             | 69    | 6       | 6. Couples HTC                       |
|             | 90    | 7       | 7. Individual HTC                    |
|             | 4     | 8       | 8. ART Screening                     |
|             | 53    | 9       | 9. CD4 Screening                     |
|             | 165   | 12      | 12. STI screening                    |
|             | 97    | 15      | 15. VMMC                             |
|             | 576   | .       | .                                    |
|             | 205   | .j      | .j. Ineligible: External site client |
|             | 2644  | .1      | .1. Ineligible: Experimental Arm     |

-----  
soc\_cRef1\_ReferralFOR For whom is referral (report by client)  
-----

```

type: numeric (byte)
label: cRef_ReferralFOR

```

```

range: [0,3] units: 1
unique values: 4 missing .: 576/4168
unique mv codes: 3 missing .*: 2849/4168

```

| tabulation: | Freq. | Numeric | Label                                |
|-------------|-------|---------|--------------------------------------|
|             | 628   | 0       | 0. Self                              |
|             | 111   | 1       | 1. Spouse                            |
|             | 2     | 2       | 2. Child                             |
|             | 2     | 3       | 3. Other                             |
|             | 576   | .       | .                                    |
|             | 205   | .j      | .j. Ineligible: External site client |
|             | 2644  | .1      | .1. Ineligible: Experimental Arm     |

-----  
soc\_cRef1\_ToSite Service site referred to (report by client)  
-----

```

type: numeric (byte)
label: cRef_ToSite

```

```

range: [1,14] units: 1
unique values: 14 missing .: 576/4168
unique mv codes: 3 missing .*: 2849/4168

```

| tabulation: | Freq. | Numeric | Label                                |
|-------------|-------|---------|--------------------------------------|
|             | 9     | 1       | 1. SFH Cairo Road                    |
|             | 75    | 2       | 2. Chawama Clinic Maternity Ward     |
|             | 7     | 3       | 3. Chawama Clinic VMMC               |
|             | 76    | 4       | 4. Chawama Clinic TB, STI, HIV       |
|             | 28    | 5       | 5. Kamwala Clinic TB, STI, HIV       |
|             | 24    | 6       | 6. Kapata Clinic MCH                 |
|             | 141   | 7       | 7. Kapata Clinic TB, STI, HIV        |
|             | 34    | 8       | 8. Chipata Gen Hosp VMMC             |
|             | 111   | 9       | 9. Chipata Gen Hosp MCH              |
|             | 41    | 10      | 10. Chipata Gen Hosp TB, STI, HIV    |
|             | 19    | 11      | 11. SFH Chipata New Start            |
|             | 9     | 12      | 12. SFH Chachacha Rd VMMC            |
|             | 39    | 13      | 13. SFH Chipata VMMC                 |
|             | 130   | 14      | 14. Other/Not specific               |
|             | 576   | .       | .                                    |
|             | 205   | .j      | .j. Ineligible: External site client |

2644 .1 .1. Ineligible: Experimental Arm

-----  
soc\_cRef1\_Serv7d Service uptake within 7 days (report by client)  
-----

type: numeric (byte)  
label: yesno  
  
range: [0,1] units: 1  
unique values: 2 missing .: 576/4168  
unique mv codes: 3 missing .\*: 2849/4168

| tabulation: | Freq. | Numeric | Label                                   |
|-------------|-------|---------|-----------------------------------------|
|             | 692   | 0       | 0. No                                   |
|             | 51    | 1       | 1. Yes                                  |
|             | 576   | .       | .                                       |
|             | 205   | .j      | .j. Ineligible: External site<br>client |
|             | 2644  | .1      | .1. Ineligible: Experimental Arm        |

-----  
soc\_cRef1\_Serv6w Service uptake within 6 weeks (report by client)  
-----

type: numeric (byte)  
label: yesno  
  
range: [0,1] units: 1  
unique values: 2 missing .: 576/4168  
unique mv codes: 3 missing .\*: 2849/4168

| tabulation: | Freq. | Numeric | Label                                   |
|-------------|-------|---------|-----------------------------------------|
|             | 616   | 0       | 0. No                                   |
|             | 127   | 1       | 1. Yes                                  |
|             | 576   | .       | .                                       |
|             | 205   | .j      | .j. Ineligible: External site<br>client |
|             | 2644  | .1      | .1. Ineligible: Experimental Arm        |

-----  
soc\_cRef1\_Serv6m Service uptake within 6 months (report by client)  
-----

type: numeric (byte)  
label: yesno  
  
range: [0,1] units: 1  
unique values: 2 missing .: 577/4168  
unique mv codes: 3 missing .\*: 2849/4168

| tabulation: | Freq. | Numeric | Label                                   |
|-------------|-------|---------|-----------------------------------------|
|             | 518   | 0       | 0. No                                   |
|             | 224   | 1       | 1. Yes                                  |
|             | 577   | .       | .                                       |
|             | 205   | .j      | .j. Ineligible: External site<br>client |
|             | 2644  | .1      | .1. Ineligible: Experimental Arm        |

-----  
soc\_cRef1\_UptakeVerified Service uptake verified in chart  
-----

type: numeric (byte)  
label: yesno  
  
range: [0,1] units: 1  
unique values: 2 missing .: 1095/4168  
unique mv codes: 3 missing .\*: 2849/4168

| tabulation: | Freq. | Numeric | Label                                |
|-------------|-------|---------|--------------------------------------|
|             | 160   | 0       | 0. No                                |
|             | 64    | 1       | 1. Yes                               |
|             | 1095  | .       | .                                    |
|             | 205   | .j      | .j. Ineligible: External site client |
|             | 2644  | .1      | .1. Ineligible: Experimental Arm     |

-----  
soc\_cRef2\_ServiceFor Service referred for (report by client)  
-----

type: numeric (byte)  
label: cRef\_ServiceFor

range: [1,15] units: 1  
unique values: 8 missing .: 810/4168  
unique mv codes: 3 missing .\*: 2849/4168

| tabulation: | Freq. | Numeric | Label                                |
|-------------|-------|---------|--------------------------------------|
|             | 134   | 1       | 1. Cervical Cancer Screening         |
|             | 36    | 4       | 4. FP                                |
|             | 93    | 6       | 6. Couples HTC                       |
|             | 44    | 7       | 7. Individual HTC                    |
|             | 19    | 9       | 9. CD4 Screening                     |
|             | 1     | 11      | 11. TB screening                     |
|             | 128   | 12      | 12. STI screening                    |
|             | 54    | 15      | 15. VMMC                             |
|             | 810   | .       | .                                    |
|             | 205   | .j      | .j. Ineligible: External site client |
|             | 2644  | .1      | .1. Ineligible: Experimental Arm     |

-----  
soc\_cRef2\_ReferralFOR For whom is referral (report by client)  
-----

type: numeric (byte)  
label: cRef\_ReferralFOR

range: [0,3] units: 1  
unique values: 4 missing .: 811/4168  
unique mv codes: 3 missing .\*: 2849/4168

| tabulation: | Freq. | Numeric | Label                                |
|-------------|-------|---------|--------------------------------------|
|             | 352   | 0       | 0. Self                              |
|             | 143   | 1       | 1. Spouse                            |
|             | 8     | 2       | 2. Child                             |
|             | 5     | 3       | 3. Other                             |
|             | 811   | .       | .                                    |
|             | 205   | .j      | .j. Ineligible: External site client |
|             | 2644  | .1      | .1. Ineligible: Experimental Arm     |

-----  
soc\_cRef2\_ToSite Service site referred to (report by client)  
-----

type: numeric (byte)  
label: cRef\_ToSite

range: [1,14] units: 1  
unique values: 14 missing .: 810/4168  
unique mv codes: 3 missing .\*: 2849/4168

| tabulation: | Freq. | Numeric | Label                            |
|-------------|-------|---------|----------------------------------|
|             | 20    | 1       | 1. SFH Cairo Road                |
|             | 48    | 2       | 2. Chawama Clinic Maternity Ward |
|             | 6     | 3       | 3. Chawama Clinic VMMC           |
|             | 39    | 4       | 4. Chawama Clinic TB, STI, HIV   |

|      |    |                                         |
|------|----|-----------------------------------------|
| 19   | 5  | 5. Kamwala Clinic TB, STI, HIV          |
| 16   | 6  | 6. Kapata Clinic MCH                    |
| 115  | 7  | 7. Kapata Clinic TB, STI, HIV           |
| 17   | 8  | 8. Chipata Gen Hosp VMMC                |
| 76   | 9  | 9. Chipata Gen Hosp MCH                 |
| 37   | 10 | 10. Chipata Gen Hosp TB, STI,<br>HIV    |
| 15   | 11 | 11. SFH Chipata New Start               |
| 5    | 12 | 12. SFH Chachacha Rd VMMC               |
| 15   | 13 | 13. SFH Chipata VMMC                    |
| 81   | 14 | 14. Other/Not specific                  |
| 810  | .  | .                                       |
| 205  | .j | .j. Ineligible: External site<br>client |
| 2644 | .1 | .1. Ineligible: Experimental Arm        |

-----  
soc\_cRef2\_Serv7d                                          Service uptake within 7 days (report by client)  
-----

type: numeric (byte)  
label: yesno

range: [0,1]                                          units: 1  
unique values: 2                                          missing .: 810/4168  
unique mv codes: 3                                          missing .\*: 2849/4168

|                                       |    |                                         |  |
|---------------------------------------|----|-----------------------------------------|--|
| tabulation: Freq.    Numeric    Label |    |                                         |  |
| 502                                   | 0  | 0. No                                   |  |
| 7                                     | 1  | 1. Yes                                  |  |
| 810                                   | .  | .                                       |  |
| 205                                   | .j | .j. Ineligible: External site<br>client |  |
| 2644                                  | .1 | .1. Ineligible: Experimental Arm        |  |

-----  
soc\_cRef2\_Serv6w                                          Service uptake within 6 weeks (report by client)  
-----

type: numeric (byte)  
label: yesno

range: [0,1]                                          units: 1  
unique values: 2                                          missing .: 810/4168  
unique mv codes: 3                                          missing .\*: 2849/4168

|                                       |    |                                         |  |
|---------------------------------------|----|-----------------------------------------|--|
| tabulation: Freq.    Numeric    Label |    |                                         |  |
| 484                                   | 0  | 0. No                                   |  |
| 25                                    | 1  | 1. Yes                                  |  |
| 810                                   | .  | .                                       |  |
| 205                                   | .j | .j. Ineligible: External site<br>client |  |
| 2644                                  | .1 | .1. Ineligible: Experimental Arm        |  |

-----  
soc\_cRef2\_Serv6m                                          Service uptake within 6 months (report by client)  
-----

type: numeric (byte)  
label: yesno

range: [0,1]                                          units: 1  
unique values: 2                                          missing .: 810/4168  
unique mv codes: 3                                          missing .\*: 2849/4168

|                                       |    |                               |  |
|---------------------------------------|----|-------------------------------|--|
| tabulation: Freq.    Numeric    Label |    |                               |  |
| 451                                   | 0  | 0. No                         |  |
| 58                                    | 1  | 1. Yes                        |  |
| 810                                   | .  | .                             |  |
| 205                                   | .j | .j. Ineligible: External site |  |

client  
2644 .1 .1. Ineligible: Experimental Arm

-----  
soc\_cRef2\_UptakeVerified Service uptake verified in chart  
-----

type: numeric (byte)  
label: yesno  
range: [0,1] units: 1  
unique values: 2 missing .: 1261/4168  
unique mv codes: 3 missing .\*: 2849/4168

| tabulation: | Freq. | Numeric | Label                                   |
|-------------|-------|---------|-----------------------------------------|
|             | 43    | 0       | 0. No                                   |
|             | 15    | 1       | 1. Yes                                  |
|             | 1261  | .       | .                                       |
|             | 205   | .j      | .j. Ineligible: External site<br>client |
|             | 2644  | .1      | .1. Ineligible: Experimental Arm        |

-----  
soc\_cRef3\_ServiceFor Service referred for (report by client)  
-----

type: numeric (byte)  
label: cRef\_ServiceFor  
range: [1,15] units: 1  
unique values: 7 missing .: 1079/4168  
unique mv codes: 3 missing .\*: 2849/4168

| tabulation: | Freq. | Numeric | Label                                   |
|-------------|-------|---------|-----------------------------------------|
|             | 49    | 1       | 1. Cervical Cancer Screening            |
|             | 26    | 4       | 4. FP                                   |
|             | 56    | 6       | 6. Couples HTC                          |
|             | 16    | 7       | 7. Individual HTC                       |
|             | 3     | 9       | 9. CD4 Screening                        |
|             | 22    | 12      | 12. STI screening                       |
|             | 68    | 15      | 15. VMMC                                |
|             | 1079  | .       | .                                       |
|             | 205   | .j      | .j. Ineligible: External site<br>client |
|             | 2644  | .1      | .1. Ineligible: Experimental Arm        |

-----  
soc\_cRef3\_ReferralFOR For whom is referral (report by client)  
-----

type: numeric (byte)  
label: cRef\_ReferralFOR  
range: [0,3] units: 1  
unique values: 4 missing .: 1079/4168  
unique mv codes: 3 missing .\*: 2849/4168

| tabulation: | Freq. | Numeric | Label                                   |
|-------------|-------|---------|-----------------------------------------|
|             | 103   | 0       | 0. Self                                 |
|             | 125   | 1       | 1. Spouse                               |
|             | 2     | 2       | 2. Child                                |
|             | 10    | 3       | 3. Other                                |
|             | 1079  | .       | .                                       |
|             | 205   | .j      | .j. Ineligible: External site<br>client |
|             | 2644  | .1      | .1. Ineligible: Experimental Arm        |

-----  
soc\_cRef3\_ToSite Service site referred to (report by client)  
-----

```

type: numeric (byte)
label: cRef_ToSite

range: [1,14] units: 1
unique values: 14 missing .: 1079/4168
unique mv codes: 3 missing .*: 2849/4168

```

| tabulation: | Freq. | Numeric | Label                                |
|-------------|-------|---------|--------------------------------------|
|             | 6     | 1       | 1. SFH Cairo Road                    |
|             | 13    | 2       | 2. Chawama Clinic Maternity Ward     |
|             | 9     | 3       | 3. Chawama Clinic VMMC               |
|             | 11    | 4       | 4. Chawama Clinic TB, STI, HIV       |
|             | 8     | 5       | 5. Kamwala Clinic TB, STI, HIV       |
|             | 12    | 6       | 6. Kapata Clinic MCH                 |
|             | 47    | 7       | 7. Kapata Clinic TB, STI, HIV        |
|             | 25    | 8       | 8. Chipata Gen Hosp VMMC             |
|             | 29    | 9       | 9. Chipata Gen Hosp MCH              |
|             | 6     | 10      | 10. Chipata Gen Hosp TB, STI, HIV    |
|             | 15    | 11      | 11. SFH Chipata New Start            |
|             | 3     | 12      | 12. SFH Chachacha Rd VMMC            |
|             | 15    | 13      | 13. SFH Chipata VMMC                 |
|             | 41    | 14      | 14. Other/Not specific               |
|             | 1079  | .       | .                                    |
|             | 205   | .j      | .j. Ineligible: External site client |
|             | 2644  | .1      | .1. Ineligible: Experimental Arm     |

-----  
soc\_cRef3\_Serv7d Service uptake within 7 days (report by client)  
-----

```

type: numeric (byte)
label: yesno

range: [0,1] units: 1
unique values: 2 missing .: 1078/4168
unique mv codes: 3 missing .*: 2849/4168

```

| tabulation: | Freq. | Numeric | Label                                |
|-------------|-------|---------|--------------------------------------|
|             | 240   | 0       | 0. No                                |
|             | 1     | 1       | 1. Yes                               |
|             | 1078  | .       | .                                    |
|             | 205   | .j      | .j. Ineligible: External site client |
|             | 2644  | .1      | .1. Ineligible: Experimental Arm     |

-----  
soc\_cRef3\_Serv6w Service uptake within 6 weeks (report by client)  
-----

```

type: numeric (byte)
label: yesno

range: [0,1] units: 1
unique values: 2 missing .: 1078/4168
unique mv codes: 3 missing .*: 2849/4168

```

| tabulation: | Freq. | Numeric | Label                                |
|-------------|-------|---------|--------------------------------------|
|             | 238   | 0       | 0. No                                |
|             | 3     | 1       | 1. Yes                               |
|             | 1078  | .       | .                                    |
|             | 205   | .j      | .j. Ineligible: External site client |
|             | 2644  | .1      | .1. Ineligible: Experimental Arm     |

-----  
soc\_cRef3\_Serv6m Service uptake within 6 months (report by client)  
-----

```

type: numeric (byte)
label: yesno

range: [0,1]
unique values: 2
unique mv codes: 3

units: 1
missing .: 1078/4168
missing .*: 2849/4168

```

```

tabulation: Freq.  Numeric  Label
             234      0      0. No
             7        1      1. Yes
            1078      .
             205      .j      .j. Ineligible: External site
                               client
            2644      .l      .l. Ineligible: Experimental Arm

```

-----

```

soc_cRef3_UptakeVerified                               Service uptake verified in chart
-----
```

```

type: numeric (byte)
label: yesno

range: [0,1]
unique values: 2
unique mv codes: 3

units: 1
missing .: 1312/4168
missing .*: 2849/4168

```

```

tabulation: Freq.  Numeric  Label
             6        0      0. No
             1        1      1. Yes
            1312      .
             205      .j      .j. Ineligible: External site
                               client
            2644      .l      .l. Ineligible: Experimental Arm

```

-----

```

soc_ServiceForfRef4                                   4 ServiceForfRef
-----
```

```

type: numeric (byte)
label: fRef_ServiceFor

range: [.,.]
unique values: 0
unique mv codes: 3

units: .
missing .: 1319/4168
missing .*: 2849/4168

```

```

tabulation: Freq.  Numeric  Label
            1319      .
            205      .j      .j. Ineligible: External site
                               client
            2644      .l      .l. Ineligible: Experimental Arm

```

-----

```

soc_ToSitefRef4                                       4 ToSitefRef
-----
```

```

type: numeric (byte)
label: fRef_ToSite

range: [.,.]
unique values: 0
unique mv codes: 3

units: .
missing .: 1319/4168
missing .*: 2849/4168

```

```

tabulation: Freq.  Numeric  Label
            1319      .
            205      .j      .j. Ineligible: External site
                               client
            2644      .l      .l. Ineligible: Experimental Arm

```

-----



```

type: numeric (byte)
label: fRef_Serv

range: [.,.]          units: .
unique values: 0      missing .: 1319/4168
unique mv codes: 3    missing .*: 2849/4168

```

| tabulation: | Freq. | Numeric | Label                                |
|-------------|-------|---------|--------------------------------------|
|             | 1319  | .       |                                      |
|             | 205   | .j      | .j. Ineligible: External site client |
|             | 2644  | .1      | .1. Ineligible: Experimental Arm     |

```

type: numeric (byte)
label: cRef_ServiceFor

range: [6,15]        units: 1
unique values: 3      missing .: 1310/4168
unique mv codes: 3    missing .*: 2849/4168

```

| tabulation: | Freq. | Numeric | Label                                |
|-------------|-------|---------|--------------------------------------|
|             | 5     | 6       | 6. Couples HTC                       |
|             | 1     | 12      | 12. STI screening                    |
|             | 3     | 15      | 15. VMMC                             |
|             | 1310  | .       |                                      |
|             | 205   | .j      | .j. Ineligible: External site client |
|             | 2644  | .1      | .1. Ineligible: Experimental Arm     |

```

type: numeric (byte)
label: cRef_ReferralFOR

range: [0,3]         units: 1
unique values: 4      missing .: 1310/4168
unique mv codes: 3    missing .*: 2849/4168

```

| tabulation: | Freq. | Numeric | Label                                |
|-------------|-------|---------|--------------------------------------|
|             | 1     | 0       | 0. Self                              |
|             | 6     | 1       | 1. Spouse                            |
|             | 1     | 2       | 2. Child                             |
|             | 1     | 3       | 3. Other                             |
|             | 1310  | .       |                                      |
|             | 205   | .j      | .j. Ineligible: External site client |
|             | 2644  | .1      | .1. Ineligible: Experimental Arm     |

```

type: numeric (byte)
label: cRef_ToSite

range: [7,14]        units: 1
unique values: 4      missing .: 1310/4168
unique mv codes: 3    missing .*: 2849/4168

```

| tabulation: | Freq. | Numeric | Label                         |
|-------------|-------|---------|-------------------------------|
|             | 4     | 7       | 7. Kapata Clinic TB, STI, HIV |

```

      2      8 8. Chipata Gen Hosp VMMC
      2     10 10. Chipata Gen Hosp TB, STI,
           HIV
      1     14 14. Other/Not specific
1310      .
205      .j .j. Ineligible: External site
           client
2644     .l .l. Ineligible: Experimental Arm

```

-----  
soc\_Serv7dcRef4

4 Serv7dcRef  
-----

```

      type: numeric (byte)
      label: yesno

      range: [0,0]
unique values: 1
unique mv codes: 3
           units: 1
           missing .: 1310/4168
           missing .*: 2849/4168

```

```

      tabulation: Freq.  Numeric  Label
                  9         0  0. No
                  1310      .
                  205      .j  .j. Ineligible: External site
                              client
                  2644     .l  .l. Ineligible: Experimental Arm

```

-----  
soc\_Serv6wcRef4

4 Serv6wcRef  
-----

```

      type: numeric (byte)
      label: yesno

      range: [0,1]
unique values: 2
unique mv codes: 3
           units: 1
           missing .: 1310/4168
           missing .*: 2849/4168

```

```

      tabulation: Freq.  Numeric  Label
                  8         0  0. No
                  1         1  1. Yes
                  1310      .
                  205      .j  .j. Ineligible: External site
                              client
                  2644     .l  .l. Ineligible: Experimental Arm

```

-----  
soc\_Serv6mcRef4

4 Serv6mcRef  
-----

```

      type: numeric (byte)
      label: yesno

      range: [0,1]
unique values: 2
unique mv codes: 3
           units: 1
           missing .: 1310/4168
           missing .*: 2849/4168

```

```

      tabulation: Freq.  Numeric  Label
                  8         0  0. No
                  1         1  1. Yes
                  1310      .
                  205      .j  .j. Ineligible: External site
                              client
                  2644     .l  .l. Ineligible: Experimental Arm

```

-----  
soc\_UptakeVerifiedcRef4

4 UptakeVerifiedcRef  
-----

```

      type: numeric (byte)

```

label: yesno

range: [.,.] units: .

unique values: 1 missing .: 1318/4168

unique mv codes: 3 missing .\*: 2849/4168

| tabulation: | Freq. | Numeric | Label                                |
|-------------|-------|---------|--------------------------------------|
|             | 1     | 0       | 0. No                                |
|             | 1318  | .       | .                                    |
|             | 205   | .j      | .j. Ineligible: External site client |
|             | 2644  | .1      | .1. Ineligible: Experimental Arm     |

-----

soc\_Comments Comments

-----

type: string (str128)

unique values: 260 missing "": 3837/4168

examples: ""

          ""

          ""

          ""

warning: variable has leading, embedded, and trailing blanks

-----

RefSelfTotal\_CTD\_an Number Referrals for Client: Client Tracking Database

-----

type: numeric (byte)

range: [0,3] units: 1

unique values: 4 missing .: 0/4168

unique mv codes: 1 missing .\*: 205/4168

| tabulation: | Freq. | Value |
|-------------|-------|-------|
|             | 2327  | 0     |
|             | 1246  | 1     |
|             | 379   | 2     |
|             | 11    | 3     |
|             | 205   | .j    |

RefSelfTotal\_CTD\_an:

1. created for analysis. Excludes Ref\*\_Source\_an = 3 (cases where client showed up for services without referral.)

-----

RefPartnerTotal\_CTD\_an Number Referrals for Client's Partner: Client Tracking Database

-----

type: numeric (byte)

range: [0,3] units: 1

unique values: 4 missing .: 0/4168

unique mv codes: 1 missing .\*: 205/4168

| tabulation: | Freq. | Value |
|-------------|-------|-------|
|             | 3149  | 0     |
|             | 667   | 1     |
|             | 143   | 2     |
|             | 4     | 3     |
|             | 205   | .j    |

RefPartnerTotal\_CTD\_an:

1. created for analysis. Excludes Ref\*\_Source\_an = 3 (cases where client showed up for services without referral.)

-----  
RefOtherTotal\_CTD\_an                                                Number Referrals for Others: Client Tracking Database  
-----

          type: numeric (byte)

          range: [0,3]                                                units: 1  
          unique values: 4                                                missing .: 0/4168  
          unique mv codes: 1                                               missing .\*: 205/4168

          tabulation: Freq. Value  
                             3856 0  
                             104 1  
                             2 2  
                             1 3  
                             205 .j

RefOtherTotal\_CTD\_an:

1. created for analysis. Excludes Ref\*\_Source\_an = 3 (cases where client showed up for services without referral.)

-----  
RefTotal\_CTD\_an                                                        Total Number Referrals: Client Tracking Database  
-----

          type: numeric (byte)

          range: [0,5]                                                units: 1  
          unique values: 6                                                missing .: 0/4168  
          unique mv codes: 1                                               missing .\*: 205/4168

          tabulation: Freq. Value  
                             2006 0  
                             1199 1  
                             485 2  
                             150 3  
                             121 4  
                             2 5  
                             205 .j

RefTotal\_CTD\_an:

1. created for analysis. Excludes Ref\*\_Source\_an = 3 (cases where client showed up for services without referral.)

-----  
RefSelfTotal\_SOC\_an                                                    Number Referrals for Client: SOC Referral Data  
-----

          type: numeric (byte)

          range: [0,3]                                                units: 1  
          unique values: 4                                                missing .: 2644/4168  
          unique mv codes: 2                                               missing .\*: 205/4168

          tabulation: Freq. Value  
                             672 0  
                             294 1  
                             270 2  
                             83 3  
                             2644 .  
                             205 .j

RefSelfTotal\_SOC\_an:

1. created for analysis.

-----  
RefPartnerTotal\_SOC\_an                                                Number Referrals for Client's Partner: SOC Referral Data  
-----

          type: numeric (byte)

range: [0,3] units: 1  
unique values: 4 missing .: 2644/4168  
unique mv codes: 2 missing .\*: 205/4168

tabulation: Freq. Value  
999 0  
267 1  
47 2  
6 3  
2644 .  
205 .j

RefPartnerTotal\_SOC\_an:  
1. created for analysis.

-----  
RefOtherTotal\_SOC\_an Number Referrals for Others: SOC Referral Data  
-----

type: numeric (byte)

range: [0,2] units: 1  
unique values: 3 missing .: 2644/4168  
unique mv codes: 2 missing .\*: 205/4168

tabulation: Freq. Value  
1291 0  
27 1  
1 2  
2644 .  
205 .j

RefOtherTotal\_SOC\_an:  
1. created for analysis.

-----  
RefTotal\_SOC\_an Total Number Referrals: SOC Referral Data  
-----

type: numeric (byte)

range: [0,3] units: 1  
unique values: 4 missing .: 2644/4168  
unique mv codes: 2 missing .\*: 205/4168

tabulation: Freq. Value  
576 0  
235 1  
268 2  
240 3  
2644 .  
205 .j

RefTotal\_SOC\_an:  
1. created for analysis.

-----  
RefTotal\_an Total Number Referrals: CTD and SOC Referral Data  
-----

type: numeric (byte)

range: [0,5] units: 1  
unique values: 6 missing .: 0/4168  
unique mv codes: 1 missing .\*: 205/4168

tabulation: Freq. Value  
1277 0  
1422 1

```

749 2
390 3
123 4
2 5
205 .j

```

RefTotal\_an:

1. created for analysis.

RefSelfTotal\_an Number Referrals for Client: CTD and SOC Referral Data

type: numeric (byte)

```

range: [0,3] units: 1
unique values: 4 missing .: 0/4168
unique mv codes: 1 missing .*: 205/4168

```

```

tabulation: Freq. Value
1690 0
1532 1
647 2
94 3
205 .j

```

RefSelfTotal\_an:

1. created for analysis.

RefPartnerTotal\_an Number Referrals for Client's Partner: CTD and SOC Referral Data

type: numeric (byte)

```

range: [0,3] units: 1
unique values: 4 missing .: 0/4168
unique mv codes: 1 missing .*: 205/4168

```

```

tabulation: Freq. Value
2829 0
934 1
190 2
10 3
205 .j

```

RefPartnerTotal\_an:

1. created for analysis.

RefOtherTotal\_an Number Referrals for Others: CTD and SOC Referral Data

type: numeric (byte)

```

range: [0,3] units: 1
unique values: 4 missing .: 0/4168
unique mv codes: 1 missing .*: 205/4168

```

```

tabulation: Freq. Value
3828 0
131 1
3 2
1 3
205 .j

```

RefOtherTotal\_an:

1. created for analysis.

EscortTotal\_an Total number of escorts client received

-----  
type: numeric (byte)  
label: EscortTotal\_an, but 4 nonmissing values are not labeled  
range: [0,3] units: 1  
unique values: 4 missing .: 0/4168  
unique mv codes: 3 missing .\*: 3184/4168

| tabulation: | Freq. | Numeric | Label                                |
|-------------|-------|---------|--------------------------------------|
|             | 280   | 0       |                                      |
|             | 612   | 1       |                                      |
|             | 86    | 2       |                                      |
|             | 6     | 3       |                                      |
|             | 2642  | .a      | .a. Not in integrated arm            |
|             | 337   | .b      | .b. No referrals                     |
|             | 205   | .j      | .j. Ineligible: External site client |

-----  
bl\_time Time Point

-----  
type: numeric (byte)  
label: time  
range: [0,0] units: 1  
unique values: 1 missing .: 0/4168

| tabulation: | Freq. | Numeric | Label       |
|-------------|-------|---------|-------------|
|             | 4168  | 0       | 0. Baseline |

-----  
bl\_ID Baseline Survey: Survey ID

-----  
type: numeric (int)  
range: [98,14920] units: 1  
unique values: 3832 missing .: 0/4168  
mean: 8571.86  
std. dev: 3246.98  
percentiles: 10% 25% 50% 75% 90%  
3936 5987.5 8929.5 11261.5 12513

-----  
bl\_Date Baseline Survey: Interviewer entered date, System timestamp

-----  
type: numeric (double)  
range: [1.703e+12,1.742e+12] units: 1000  
unique values: 4163 missing .: 0/4168  
mean: 1.7e+12  
std. dev: 6.5e+09  
percentiles: 10% 25% 50% 75% 90%  
1.7e+12 1.7e+12 1.7e+12 1.7e+12 1.7e+12

-----  
bl\_SurveyStatus Baseline Survey: Survey Status

-----  
type: numeric (byte)  
label: SurveyStatus

range: [0,2] units: 1  
unique values: 3 missing .: 0/4168

| tabulation: | Freq. | Numeric | Label                      |
|-------------|-------|---------|----------------------------|
|             | 7     | 0       | 0. Interrupted             |
|             | 4097  | 1       | 1. Completed               |
|             | 64    | 2       | 2. Completed on resumption |

-----  
bl\_AdminAge Baseline Survey: Age entered by interviewer  
-----

type: numeric (byte)

range: [18,48] units: 1  
unique values: 31 missing .: 0/4168

mean: 26.5837  
std. dev: 6.59386

| percentiles: | 10% | 25% | 50% | 75% | 90% |
|--------------|-----|-----|-----|-----|-----|
|              | 19  | 21  | 25  | 31  | 36  |

bl\_AdminAge:  
1. Do NOT use this variable for analysis. Entered for administrative purposes. Should use bl\_102a.

-----  
bl\_SurveyGender Baseline Survey: Gender of survey version completed (NOT PARTICIPANT GENDER)  
-----

type: string (str6)

unique values: 2 missing "": 0/4168

| tabulation: | Freq. | Value    |
|-------------|-------|----------|
|             | 2133  | "Female" |
|             | 2035  | "Male"   |

bl\_SurveyGender:  
1. Survey gender does NOT always match true participant gender.

-----  
bl\_InterviewerID Baseline Survey: Interviewer ID  
-----

type: numeric (int)

range: [100,223] units: 1  
unique values: 25 missing .: 0/4168

| tabulation: | Freq. | Value |
|-------------|-------|-------|
|             | 303   | 100   |
|             | 249   | 101   |
|             | 117   | 102   |
|             | 268   | 103   |
|             | 234   | 104   |
|             | 118   | 105   |
|             | 173   | 106   |
|             | 145   | 107   |
|             | 60    | 108   |
|             | 297   | 109   |
|             | 11    | 110   |
|             | 133   | 111   |
|             | 100   | 112   |
|             | 88    | 113   |
|             | 258   | 114   |
|             | 320   | 115   |
|             | 183   | 116   |
|             | 362   | 117   |



167 118  
194 119  
159 120  
21 210  
4 211  
146 222  
58 223

-----  
bl\_GUID\_sys Baseline Survey: Unique survey identifier  
-----

type: string (str36)  
unique values: 4168 missing "": 0/4168  
examples: "35a164be-6876-4ae2-886e-9819a3bdab21"  
"684dc1cf-696d-450a-8430-cca9fb9a084c"  
"9ae128d9-f9b3-4184-8a4f-4ec1883ea7da"  
"ce5ea272-0bb5-4ac8-a7ca-1e09828e57fd"

-----  
bl\_SiteID Baseline Survey: Survey Site ID  
-----

type: numeric (byte)  
label: bl\_SiteID  
range: [1,95] units: 1  
unique values: 12 missing .: 0/4168  
tabulation: Freq. Numeric Label  
557 1 1. SFH HCT - Cairo Road  
490 2 2. Chawama Clinic - Maternity  
Ward  
244 3 3. Chawama Clinic - Out Patient  
Ward (VMMC)  
362 5 5. Kamwala Clinic - TB, STI &  
HIV Clinic  
545 6 6. Kapata Urban Clinic, MCH  
775 7 7. Kapata Urban Clinic, TB, STI  
& HIV  
189 8 8. Chipata Gen Hosp - OP VMMC  
713 11 11. SFH New Start  
88 13 13. SFH VMMC  
68 93 93. YWCA FP Site  
68 94 94. YWCA HTC Site  
69 95 95. YWCA VMMC

bl\_SiteID:  
1. 93, 94, & 95 are external evaluation sites

-----  
bl\_SiteName Baseline Survey: Survey Site String  
-----

type: string (str40)  
unique values: 14 missing "": 0/4168  
tabulation: Freq. Value  
490 "Chawama Clinic - Maternity Ward"  
244 "Chawama Clinic - Out Patient Ward  
(VMMC)"  
189 "Chipata Gen Hosp - OP VMMC"  
214 "Kamwala Clinic - TB, STI & HIV Clinic"  
148 "Kamwala Clinic - TB, STI and HIV  
Clinic"  
545 "Kapata Urban Clinic, MCH"  
413 "Kapata Urban Clinic, TB, STI & HIV"

```

362 "Kapata Urban Clinic, TB, STI and HIV"
557 "SFH HCT - Cairo Road"
713 "SFH New Start"
88 "SFH VMMC"
68 "YWCA FP Site"
68 "YWCA HTC Site"
69 "YWCA VMMC"

```

warning: variable has embedded blanks

bl\_SiteName:

1. YWCA sites are external evaluation sites

-----  
bl\_SurveyType Baseline Survey: Survey Type  
-----

```

      type: numeric (byte)
      label: SurveyType

      range: [1,2]                units: 1
unique values: 2                  missing .: 0/4168

      tabulation: Freq.  Numeric  Label
                  2133      1      1. Baseline Female
                  2035      2      2. Baseline Male

```

-----  
bl\_SurveyTypeName Baseline Survey: Survey Type String  
-----

```

      type: string (str27)

unique values: 2                  missing "": 0/4168

      tabulation: Freq.  Value
                  2133  "Behavioral Baseline -Female"
                  2035  "Behavioral Baseline -Male"

```

warning: variable has embedded blanks

-----  
bl\_SurveyDuration\_sys Minutes for survey completion  
-----

```

      type: numeric (int)

      range: [-704,1578]          units: 1
unique values: 90                missing .: 0/4168

      mean: 38.2354
      std. dev: 126.728

      percentiles:      10%      25%      50%      75%      90%
                       20        24        29        35        42

```

bl\_SurveyDuration\_sys:

1. Large values may be due to completing survey on resumption (see SurveyStatus).

-----  
bl\_Weekday\_sys Baseline Survey: Day of week  
-----

```

      type: string (str3)

unique values: 7                  missing "": 0/4168

      tabulation: Freq.  Value
                  820    "Fri"
                  881    "Mon"

```

45 "Sat"  
19 "Sun"  
887 "Thu"  
780 "Tue"  
736 "Wed"

bl\_Weekday\_sys:

1. Generated automatically based on bl\_Date

-----  
bl\_Day\_sys Baseline Survey: Day of month  
-----

type: numeric (byte)  
range: [1,31] units: 1  
unique values: 31 missing .: 0/4168  
mean: 15.4592  
std. dev: 8.67083  
percentiles: 10% 25% 50% 75% 90%  
4 8 15 23 28

bl\_Day\_sys:

1. Generated automatically based on bl\_Date

-----  
bl\_Month\_sys Baseline Survey: Day of month  
-----

type: numeric (byte)  
range: [1,12] units: 1  
unique values: 12 missing .: 0/4168  
tabulation: Freq. Value  
165 1  
394 2  
612 3  
534 4  
590 5  
599 6  
385 7  
340 8  
283 9  
155 10  
62 11  
49 12

bl\_Month\_sys:

1. Generated automatically based on bl\_Date

-----  
bl\_DBVersion Baseline Survey: App Version  
-----

type: numeric (double)  
range: [1.4,2.6] units: .1  
unique values: 10 missing .: 0/4168  
tabulation: Freq. Value  
262 1.4  
1 1.5  
214 1.6  
45 1.8  
111 1.9  
50 2  
1175 2.1

927 2.2  
998 2.5  
385 2.6

-----  
bl\_AppVersion

AppVersion  
-----

type: numeric (double)  
range: [1.4,2.6] units: .1  
unique values: 9 missing .: 0/4168

tabulation: Freq. Value  
263 1.4  
214 1.6  
45 1.8  
111 1.9  
50 2  
1175 2.1  
927 2.2  
998 2.5  
385 2.6

-----  
bl\_100a

100: Hour interview began  
-----

type: numeric (byte)  
range: [6,17] units: 1  
unique values: 12 missing .: 0/4168  
unique mv codes: 1 missing .\*: 1/4168

tabulation: Freq. Value  
97 6  
3 7  
56 8  
567 9  
971 10  
939 11  
692 12  
291 13  
256 14  
251 15  
43 16  
1 17  
1 .m

-----  
bl\_100b

100: Minute interview began  
-----

type: numeric (byte)  
range: [0,59] units: 1  
unique values: 60 missing .: 0/4168  
unique mv codes: 1 missing .\*: 1/4168

mean: 28.8275  
std. dev: 17.2749

percentiles: 10% 25% 50% 75% 90%  
5 14 30 44 53

-----  
bl\_101a

101: Month of birth  
-----

type: numeric (byte)

label: num\_bl, but 12 nonmissing values are not labeled  
range: [1,88] units: 1  
unique values: 13 missing .: 0/4168

| tabulation: | Freq. | Numeric | Label          |
|-------------|-------|---------|----------------|
|             | 380   | 1       |                |
|             | 332   | 2       |                |
|             | 329   | 3       |                |
|             | 326   | 4       |                |
|             | 297   | 5       |                |
|             | 412   | 6       |                |
|             | 282   | 7       |                |
|             | 354   | 8       |                |
|             | 297   | 9       |                |
|             | 389   | 10      |                |
|             | 272   | 11      |                |
|             | 382   | 12      |                |
|             | 116   | 88      | 88. Don't Know |

-----  
bl\_101b 101: Year of birth  
-----

type: numeric (int)  
label: numyr, but 33 nonmissing values are not labeled  
range: [1964,8888] units: 1  
unique values: 34 missing .: 0/4168  
examples: 1981  
1987  
1990  
1993

-----  
bl\_102a 102: Age at last birthday reported by respondent  
-----

type: numeric (byte)  
range: [18,49] units: 1  
unique values: 32 missing .: 0/4168  
mean: 26.517  
std. dev: 6.63663  
percentiles: 10% 25% 50% 75% 90%  
19 21 25 31 36

-----  
bl\_102b 102: How was age determined in 102a?  
-----

type: numeric (byte)  
label: bl\_102b  
range: [1,3] units: 1  
unique values: 3 missing .: 0/4168  
tabulation: Freq. Numeric Label  
4095 1 1. Age or year known by resp  
57 2 2. Est. using period/eras  
16 3 3. Est. using visual  
approximation

-----  
bl\_103 103: Living in village currently  
-----

```

    type: numeric (byte)
    label: yesno_bl

    range: [0,1]
    unique values: 2

    units: 1
    missing .: 0/4168

    tabulation: Freq.   Numeric   Label
                 3928       0   0. No
                 240        1   1. Yes

```

-----  
bl\_104 104: Village Name  
-----

```

    type: string (str41)

    unique values: 155
    missing "": 0/4168

    examples: ". "
              ". "
              ". "
              ". "

    warning: variable has embedded blanks

```

-----  
bl\_105 105: Town name  
-----

```

    type: string (str31)

    unique values: 802
    missing "": 0/4168

    examples: "Chipata"
              "Kamwala South"
              "Lusaka"
              "Muthlansembe"

    warning: variable has embedded blanks

```

-----  
bl\_106 106: Ever attended school  
-----

```

    type: numeric (byte)
    label: yesno_bl

    range: [0,1]
    unique values: 2

    units: 1
    missing .: 0/4168

    tabulation: Freq.   Numeric   Label
                 230       0   0. No
                 3938      1   1. Yes

```

-----  
bl\_107 107: Currently attending school  
-----

```

    type: numeric (byte)
    label: bl_107

    range: [0,1]
    unique values: 2
    unique mv codes: 1

    units: 1
    missing .: 0/4168
    missing .*: 230/4168

    tabulation: Freq.   Numeric   Label
                 3042       0   0. No
                 896        1   1. Yes
                 230        .a   .a. Never attended school

```

-----  
bl\_108 108: Highest level of school attended  
-----

type: numeric (byte)  
label: bl\_108  
  
range: [1,4] units: 1  
unique values: 4 missing .: 0/4168  
unique mv codes: 1 missing .\*: 230/4168

| tabulation: | Freq. | Numeric | Label                           |
|-------------|-------|---------|---------------------------------|
|             | 962   | 1       | 1. Primary                      |
|             | 2357  | 2       | 2. Secondary                    |
|             | 308   | 3       | 3. Trade School/Private College |
|             | 311   | 4       | 4. University/College           |
|             | 230   | .a      | .a. Never attended school       |

-----  
bl\_109 109: Highest grade completed in primary  
-----

type: numeric (byte)  
label: bl\_109, but 7 nonmissing values are not labeled  
  
range: [0,7] units: 1  
unique values: 8 missing .: 0/4168  
unique mv codes: 4 missing .\*: 3206/4168

| tabulation: | Freq. | Numeric | Label                            |
|-------------|-------|---------|----------------------------------|
|             | 2     | 0       | 0. Did not complete 1st grade    |
|             | 15    | 1       |                                  |
|             | 41    | 2       |                                  |
|             | 70    | 3       |                                  |
|             | 108   | 4       |                                  |
|             | 137   | 5       |                                  |
|             | 182   | 6       |                                  |
|             | 407   | 7       |                                  |
|             | 230   | .a      | .a. Never attended school        |
|             | 2357  | .c      | .c. Secondary                    |
|             | 308   | .d      | .d. Trade school/private college |
|             | 311   | .f      | .f. University                   |

-----  
bl\_110 110: Years completed in trade school/private college  
-----

type: numeric (byte)  
label: bl\_110, but 5 nonmissing values are not labeled  
  
range: [0,6] units: 1  
unique values: 6 missing .: 0/4168  
unique mv codes: 4 missing .\*: 3860/4168

| tabulation: | Freq. | Numeric | Label                        |
|-------------|-------|---------|------------------------------|
|             | 18    | 0       | 0. Did not complete 1st year |
|             | 98    | 1       |                              |
|             | 125   | 2       |                              |
|             | 61    | 3       |                              |
|             | 5     | 4       |                              |
|             | 1     | 6       |                              |
|             | 230   | .a      | .a. Never attended school    |
|             | 962   | .b      | .b. Primary                  |
|             | 2357  | .c      | .c. Secondary                |
|             | 311   | .f      | .f. University               |

-----  
bl\_111 111: Highest grade completed in secondary  
-----

```

type: numeric (byte)
label: bl_111, but 5 nonmissing values are not labeled

range: [0,12] units: 1
unique values: 6 missing .: 0/4168
unique mv codes: 4 missing .*: 1504/4168

```

```

tabulation: Freq. Numeric Label
             9         0 0. Did not complete 8th grade
             263        8
             614        9
             213       10
             295       11
            1270       12
             230        .a .a. Never attended school
             962        .b .b. Primary
             311        .f .f. University
              1         .s .s. Skipped by participant

```

```

-----
bl_112                                     112: Years completed in university/college
-----

```

```

type: numeric (byte)
label: bl_112, but 8 nonmissing values are not labeled

range: [0,8] units: 1
unique values: 9 missing .: 0/4168
unique mv codes: 4 missing .*: 3856/4168

```

```

tabulation: Freq. Numeric Label
             9         0 0. Did not complete 1st year
             67        1
            102        2
             74        3
             44        4
             11        5
              3        6
              1        7
              1        8
            230        .a .a. Never attended school
            962        .b .b. Primary
           2357        .c .c. Secondary
            307        .d .d. Trade school/private college

```

```

-----
bl_113a1                                   113: Community primary school attended
-----

```

```

type: numeric (byte)
label: bl_113a

range: [0,1] units: 1
unique values: 2 missing .: 0/4168
unique mv codes: 1 missing .*: 230/4168

```

```

tabulation: Freq. Numeric Label
            3615        0 0. No
             323         1 1. Yes
             230         .a .a. Never attended school

```

```

-----
bl_113a2                                   113: Government primary school attended
-----

```

```

type: numeric (byte)
label: bl_113a

range: [0,1] units: 1
unique values: 2 missing .: 0/4168

```



unique mv codes: 1 missing .\*: 230/4168

| tabulation: | Freq. | Numeric | Label                     |
|-------------|-------|---------|---------------------------|
|             | 462   | 0       | 0. No                     |
|             | 3476  | 1       | 1. Yes                    |
|             | 230   | .a      | .a. Never attended school |

-----  
bl\_113a3 113: Mission primary school attended  
-----

type: numeric (byte)  
label: bl\_113a

range: [0,1] units: 1  
unique values: 2 missing .: 0/4168  
unique mv codes: 1 missing .\*: 230/4168

| tabulation: | Freq. | Numeric | Label                     |
|-------------|-------|---------|---------------------------|
|             | 3776  | 0       | 0. No                     |
|             | 162   | 1       | 1. Yes                    |
|             | 230   | .a      | .a. Never attended school |

-----  
bl\_113a4 113: Private primary school attended  
-----

type: numeric (byte)  
label: bl\_113a

range: [0,1] units: 1  
unique values: 2 missing .: 0/4168  
unique mv codes: 1 missing .\*: 230/4168

| tabulation: | Freq. | Numeric | Label                     |
|-------------|-------|---------|---------------------------|
|             | 3532  | 0       | 0. No                     |
|             | 406   | 1       | 1. Yes                    |
|             | 230   | .a      | .a. Never attended school |

-----  
bl\_113b1 113: Government secondary school attended  
-----

type: numeric (byte)  
label: bl\_113b

range: [0,1] units: 1  
unique values: 2 missing .: 0/4168  
unique mv codes: 3 missing .\*: 1811/4168

| tabulation: | Freq. | Numeric | Label                                                  |
|-------------|-------|---------|--------------------------------------------------------|
|             | 231   | 0       | 0. No                                                  |
|             | 2126  | 1       | 1. Yes                                                 |
|             | 230   | .a      | .a. Never attended school                              |
|             | 962   | .b      | .b. Primary                                            |
|             | 619   | .e      | .e. Skip error: Trade school/university did not answer |

-----  
bl\_113b2 113: Mission secondary school attended  
-----

type: numeric (byte)  
label: bl\_113b

range: [0,1] units: 1  
unique values: 2 missing .: 0/4168  
unique mv codes: 3 missing .\*: 1811/4168

| tabulation: | Freq. | Numeric | Label |
|-------------|-------|---------|-------|
|-------------|-------|---------|-------|

```

2217      0  0. No
140       1  1. Yes
230      .a .a. Never attended school
962      .b .b. Primary
619      .e .e. Skip error: Trade
           school/university did not answer

```

-----  
bl\_113b3 113: Private secondary school attended  
-----

```

type: numeric (byte)
label: bl_113b

range: [0,1]          units: 1
unique values: 2      missing .: 0/4168
unique mv codes: 3    missing .*: 1811/4168

```

```

tabulation: Freq.  Numeric  Label
2160        0  0. No
197         1  1. Yes
230        .a .a. Never attended school
962        .b .b. Primary
619        .e .e. Skip error: Trade
           school/university did not answer

```

-----  
bl\_114 114: Religion  
-----

```

type: numeric (byte)
label: bl_114

range: [1,5]          units: 1
unique values: 5      missing .: 0/4168

```

```

tabulation: Freq.  Numeric  Label
789         1  1. Catholic
3182        2  2. Other Christian
47          3  3. Muslim
32          4  4. No religion
118         5  5. Other

```

-----  
bl\_115a 115: Ethnic group/Tribe: Lozi  
-----

```

type: numeric (byte)
label: yesno_bl

range: [0,1]          units: 1
unique values: 2      missing .: 0/4168
unique mv codes: 1    missing .*: 1/4168

```

```

tabulation: Freq.  Numeric  Label
4007        0  0. No
160         1  1. Yes
1           .s .s. Skipped by participant

```

-----  
bl\_115b 115: Ethnic group/Tribe: Ngoni  
-----

```

type: numeric (byte)
label: yesno_bl

range: [0,1]          units: 1
unique values: 2      missing .: 0/4168
unique mv codes: 1    missing .*: 1/4168

```

```

tabulation: Freq.  Numeric  Label
             2845      0  0. No
             1322      1  1. Yes
              1       .s  .s. Skipped by participant

```

-----  
bl\_115c 115: Ethnic group/Tribe: Tonga  
-----

```

type: numeric (byte)
label: yesno_bl

range: [0,1]                units: 1
unique values: 2             missing .: 0/4168
unique mv codes: 1          missing .*: 1/4168

```

```

tabulation: Freq.  Numeric  Label
             3885      0  0. No
             282       1  1. Yes
              1       .s  .s. Skipped by participant

```

-----  
bl\_115d 115: Ethnic group/Tribe: Lunda  
-----

```

type: numeric (byte)
label: yesno_bl

range: [0,1]                units: 1
unique values: 2             missing .: 0/4168
unique mv codes: 1          missing .*: 1/4168

```

```

tabulation: Freq.  Numeric  Label
             4127      0  0. No
              40       1  1. Yes
              1       .s  .s. Skipped by participant

```

-----  
bl\_115e 115: Ethnic group/Tribe: Bemba  
-----

```

type: numeric (byte)
label: yesno_bl

range: [0,1]                units: 1
unique values: 2             missing .: 0/4168
unique mv codes: 1          missing .*: 1/4168

```

```

tabulation: Freq.  Numeric  Label
             3510      0  0. No
             657       1  1. Yes
              1       .s  .s. Skipped by participant

```

-----  
bl\_115f 115: Ethnic group/Tribe: Kaonde  
-----

```

type: numeric (byte)
label: yesno_bl

range: [0,1]                units: 1
unique values: 2             missing .: 0/4168
unique mv codes: 1          missing .*: 1/4168

```

```

tabulation: Freq.  Numeric  Label
             4098      0  0. No
              69       1  1. Yes
              1       .s  .s. Skipped by participant

```



```

      3      51 51. River/stream
     10      61 61. Bottled water
     18      62 62. Other
      1      .s .s. Skipped by participant

```

---

```

bl_123                                     123: Travel time to drinking water (minutes)

```

---

```

      type: numeric (int)
      label: bl_123, but 24 nonmissing values are not labeled

      range: [0,888]                units: 1
unique values: 26                    missing .: 0/4168
unique mv codes: 2                    missing .*: 2409/4168

```

```

tabulation:  Freq.  Numeric  Label
              121      0      0. On premises
              139      1
              232      2
              234      3
               84      4
              486      5
               17      6
               18      7
               10      8
                1      9
             226     10
                4     12
               46     15
               45     20
                1     21
              52     30
                1     35
                3     40
                1     45
                9     60
                1     64
                1     65
                1     90
                4    120
                1    180
               21    888 888. Don't Know
            2407     .a  .a. Skipped due to answer in
                   bl_122
                2     .s  .s. Skipped by participant

```

---

```

bl_124                                     124: Toilet facility for household

```

---

```

      type: numeric (byte)
      label: bl_124

      range: [1,8]                units: 1
unique values: 8                    missing .: 0/4168
unique mv codes: 1                    missing .*: 1/4168

```

```

tabulation:  Freq.  Numeric  Label
              1161     1      1. Flush toilet
              120      2      2. VIP latrine
              478      3      3. Covered pit latrine no slab
             1631     4      4. Covered pit latrine w/ slab
              286      5      5. Uncovered pit latrine no slab
              483      6      6. Uncovered pit latrine w/ slab
                2      7      7. Bush/throw away
                6      8      8. Other
                1      .s  .s. Skipped by participant

```

---

bl\_125

125: Number of household using toilet (excluding R's household)

-----  
type: numeric (byte)  
label: num\_bl, but 17 nonmissing values are not labeled  
range: [0,88] units: 1  
unique values: 18 missing .: 0/4168  
unique mv codes: 2 missing .\*: 3/4168

| tabulation: | Freq. | Numeric | Label                      |
|-------------|-------|---------|----------------------------|
|             | 2189  | 0       |                            |
|             | 455   | 1       |                            |
|             | 507   | 2       |                            |
|             | 419   | 3       |                            |
|             | 232   | 4       |                            |
|             | 125   | 5       |                            |
|             | 72    | 6       |                            |
|             | 48    | 7       |                            |
|             | 32    | 8       |                            |
|             | 15    | 9       |                            |
|             | 19    | 10      |                            |
|             | 4     | 11      |                            |
|             | 3     | 12      |                            |
|             | 3     | 13      |                            |
|             | 1     | 14      |                            |
|             | 7     | 15      |                            |
|             | 17    | 16      |                            |
|             | 17    | 88      | 88. Don't Know             |
|             | 2     | .m      | .m. Missing                |
|             | 1     | .s      | .s. Skipped by participant |

bl\_126a

126: Household inventory: Electricity

-----  
type: numeric (byte)  
label: yesno\_bl  
range: [0,1] units: 1  
unique values: 2 missing .: 0/4168  
unique mv codes: 1 missing .\*: 1/4168

| tabulation: | Freq. | Numeric | Label                      |
|-------------|-------|---------|----------------------------|
|             | 1415  | 0       | 0. No                      |
|             | 2752  | 1       | 1. Yes                     |
|             | 1     | .s      | .s. Skipped by participant |

bl\_126b

126: Household inventory: Radio

-----  
type: numeric (byte)  
label: yesno\_bl  
range: [0,1] units: 1  
unique values: 2 missing .: 0/4168  
unique mv codes: 1 missing .\*: 1/4168

| tabulation: | Freq. | Numeric | Label                      |
|-------------|-------|---------|----------------------------|
|             | 1183  | 0       | 0. No                      |
|             | 2984  | 1       | 1. Yes                     |
|             | 1     | .s      | .s. Skipped by participant |

bl\_126c

126: Household inventory: Cassette Player

-----  
type: numeric (byte)  
label: yesno\_bl

```

range: [0,1] units: 1
unique values: 2 missing .: 0/4168
unique mv codes: 1 missing .*: 1/4168

tabulation: Freq. Numeric Label
             2603      0 0. No
             1564      1 1. Yes
              1      .s .s. Skipped by participant

```

-----  
bl\_126d 126: Household inventory: Television  
-----

```

type: numeric (byte)
label: yesno_bl

range: [0,1] units: 1
unique values: 2 missing .: 0/4168
unique mv codes: 1 missing .*: 1/4168

tabulation: Freq. Numeric Label
             1217      0 0. No
             2950      1 1. Yes
              1      .s .s. Skipped by participant

```

-----  
bl\_126e 126: Household inventory: Mobile Phone  
-----

```

type: numeric (byte)
label: yesno_bl

range: [0,1] units: 1
unique values: 2 missing .: 0/4168
unique mv codes: 1 missing .*: 1/4168

tabulation: Freq. Numeric Label
             775      0 0. No
             3392      1 1. Yes
              1      .s .s. Skipped by participant

```

-----  
bl\_126f 126: Household inventory: Fixed Phone  
-----

```

type: numeric (byte)
label: yesno_bl

range: [0,1] units: 1
unique values: 2 missing .: 0/4168
unique mv codes: 1 missing .*: 1/4168

tabulation: Freq. Numeric Label
             4013      0 0. No
              154      1 1. Yes
              1      .s .s. Skipped by participant

```

-----  
bl\_126g 126: Household inventory: Refrigerator  
-----

```

type: numeric (byte)
label: yesno_bl

range: [0,1] units: 1
unique values: 2 missing .: 0/4168
unique mv codes: 1 missing .*: 1/4168

tabulation: Freq. Numeric Label

```

2205 0 0. No  
1962 1 1. Yes  
1 .s .s. Skipped by participant

-----  
bl\_126h 126: Household inventory: Table  
-----

type: numeric (byte)  
label: yesno\_bl  
  
range: [0,1] units: 1  
unique values: 2 missing .: 0/4168  
unique mv codes: 1 missing .\*: 1/4168

| tabulation: | Freq. | Numeric | Label                      |
|-------------|-------|---------|----------------------------|
|             | 780   | 0       | 0. No                      |
|             | 3387  | 1       | 1. Yes                     |
|             | 1     | .s      | .s. Skipped by participant |

-----  
bl\_126i 126: Household inventory: Sofa  
-----

type: numeric (byte)  
label: yesno\_bl  
  
range: [0,1] units: 1  
unique values: 2 missing .: 0/4168  
unique mv codes: 1 missing .\*: 1/4168

| tabulation: | Freq. | Numeric | Label                      |
|-------------|-------|---------|----------------------------|
|             | 1114  | 0       | 0. No                      |
|             | 3053  | 1       | 1. Yes                     |
|             | 1     | .s      | .s. Skipped by participant |

-----  
bl\_126j 126: Household inventory: Bed  
-----

type: numeric (byte)  
label: yesno\_bl  
  
range: [0,1] units: 1  
unique values: 2 missing .: 0/4168  
unique mv codes: 1 missing .\*: 1/4168

| tabulation: | Freq. | Numeric | Label                      |
|-------------|-------|---------|----------------------------|
|             | 657   | 0       | 0. No                      |
|             | 3510  | 1       | 1. Yes                     |
|             | 1     | .s      | .s. Skipped by participant |

-----  
bl\_126k 126: Household inventory: CD/Digital music player  
-----

type: numeric (byte)  
label: yesno\_bl  
  
range: [0,1] units: 1  
unique values: 2 missing .: 0/4168  
unique mv codes: 1 missing .\*: 1/4168

| tabulation: | Freq. | Numeric | Label                      |
|-------------|-------|---------|----------------------------|
|             | 2026  | 0       | 0. No                      |
|             | 2141  | 1       | 1. Yes                     |
|             | 1     | .s      | .s. Skipped by participant |

-----  
bl\_126l 126: Household inventory: VCR/DVD player  
-----



```

-----
      type: numeric (byte)
      label: yesno_bl

      range: [0,1]                units: 1
unique values: 2                missing .: 0/4168
unique mv codes: 1             missing .*: 1/4168

      tabulation: Freq.  Numeric  Label
                  1673      0      0. No
                  2494      1      1. Yes
                   1         .s     .s. Skipped by participant

```

```

-----
bl_126m                                     126: Household inventory: Car
-----

```

```

      type: numeric (byte)
      label: yesno_bl

      range: [0,1]                units: 1
unique values: 2                missing .: 0/4168
unique mv codes: 1             missing .*: 1/4168

      tabulation: Freq.  Numeric  Label
                  3486      0      0. No
                   681      1      1. Yes
                   1         .s     .s. Skipped by participant

```

```

-----
bl_126n                                     126: Household inventory: Motorcycle
-----

```

```

      type: numeric (byte)
      label: yesno_bl

      range: [0,1]                units: 1
unique values: 2                missing .: 0/4168
unique mv codes: 1             missing .*: 1/4168

      tabulation: Freq.  Numeric  Label
                  3983      0      0. No
                   184      1      1. Yes
                   1         .s     .s. Skipped by participant

```

```

-----
bl_126o                                     126: Household inventory: Bicycle
-----

```

```

      type: numeric (byte)
      label: yesno_bl

      range: [0,1]                units: 1
unique values: 2                missing .: 0/4168
unique mv codes: 1             missing .*: 1/4168

      tabulation: Freq.  Numeric  Label
                  2849      0      0. No
                  1318      1      1. Yes
                   1         .s     .s. Skipped by participant

```

```

-----
bl_127                                     127: Household owns house
-----

```

```

      type: numeric (byte)
      label: yesno_bl

      range: [0,1]                units: 1

```

unique values: 2 missing .: 0/4168  
unique mv codes: 1 missing .\*: 1/4168

| tabulation: | Freq. | Numeric | Label                      |
|-------------|-------|---------|----------------------------|
|             | 2465  | 0       | 0. No                      |
|             | 1702  | 1       | 1. Yes                     |
|             | 1     | .s      | .s. Skipped by participant |

---

bl\_128 128: Own personal cell/mobile phone

---

type: numeric (byte)  
label: yesno\_bl

range: [0,1] units: 1  
unique values: 2 missing .: 0/4168

| tabulation: | Freq. | Numeric | Label  |
|-------------|-------|---------|--------|
|             | 684   | 0       | 0. No  |
|             | 3484  | 1       | 1. Yes |

---

bl\_129 129: Kind of work to earn money

---

type: string (str65)

unique values: 763 missing "": 0/4168

examples: "0 Does not work"  
"0 Does not work"  
"Business"  
"Mechanic"

warning: variable has embedded blanks

---

bl\_130a 130: Total amount money earned

---

type: numeric (byte)  
label: bl\_130a

range: [0,31] units: 1  
unique values: 31 missing .: 0/4168  
unique mv codes: 2 missing .\*: 2281/4168

|           |    |     |               |    |
|-----------|----|-----|---------------|----|
| examples: | 13 | 13. | 551-600       | KR |
|           | 26 | 26. | 3001-3500     | KR |
|           | .a | .a. | Does not work |    |
|           | .a | .a. | Does not work |    |

bl\_130a:

1. Due to programming error, both 51-100 KR and 701-750 KR were coded as 16

---

bl\_130b 130: Unit of measure

---

type: numeric (byte)  
label: bl\_130b

range: [1,5] units: 1  
unique values: 5 missing .: 0/4168  
unique mv codes: 3 missing .\*: 2325/4168

| tabulation: | Freq. | Numeric | Label     |
|-------------|-------|---------|-----------|
|             | 6     | 1       | 1. Hourly |
|             | 481   | 2       | 2. Daily  |

|      |    |                            |
|------|----|----------------------------|
| 1285 | 3  | 3. Monthly                 |
| 35   | 4  | 4. Yearly                  |
| 36   | 5  | 5. Paid in-kind            |
| 2209 | .a | .a. Does not work          |
| 49   | .b | .b. Earns nothing          |
| 67   | .s | .s. Skipped by participant |

-----  
bl\_200 200: Ever married or lived with someone  
-----

type: numeric (byte)  
label: bl\_200

|                  |       |             |        |
|------------------|-------|-------------|--------|
| range:           | [0,3] | units:      | 1      |
| unique values:   | 4     | missing .:  | 0/4168 |
| unique mv codes: | 1     | missing .*: | 1/4168 |

| tabulation: | Freq. | Numeric | Label                      |
|-------------|-------|---------|----------------------------|
|             | 1705  | 0       | 0. No                      |
|             | 2178  | 1       | 1. Yes, married            |
|             | 256   | 2       | 2. Yes, lived with partner |
|             | 28    | 3       | 3. Both                    |
|             | 1     | .s      | .s. Skipped by participant |

-----  
bl\_201 201: Currently have primary sex partner  
-----

type: numeric (byte)  
label: bl\_201

|                  |       |             |           |
|------------------|-------|-------------|-----------|
| range:           | [0,1] | units:      | 1         |
| unique values:   | 2     | missing .:  | 0/4168    |
| unique mv codes: | 2     | missing .*: | 2464/4168 |

| tabulation: | Freq. | Numeric | Label                               |
|-------------|-------|---------|-------------------------------------|
|             | 514   | 0       | 0. No                               |
|             | 1190  | 1       | 1. Yes                              |
|             | 2462  | .a      | .a. Ever married/lived with partner |
|             | 2     | .s      | .s. Skipped by participant          |

-----  
bl\_202 202: Age when sexual relationship began  
-----

type: numeric (byte)  
label: bl\_202, but 30 nonmissing values are not labeled

|                  |        |             |           |
|------------------|--------|-------------|-----------|
| range:           | [6,88] | units:      | 1         |
| unique values:   | 31     | missing .:  | 0/4168    |
| unique mv codes: | 3      | missing .*: | 2983/4168 |

examples: 22  
.a .a. Ever married/lived with partner  
.a .a. Ever married/lived with partner  
.a .a. Ever married/lived with partner

-----  
bl\_203 203: Age of primary sex partner  
-----

type: numeric (byte)  
label: bl\_203, but 33 nonmissing values are not labeled

|                  |         |             |           |
|------------------|---------|-------------|-----------|
| range:           | [14,88] | units:      | 1         |
| unique values:   | 34      | missing .:  | 0/4168    |
| unique mv codes: | 4       | missing .*: | 2986/4168 |

examples: 24  
.a .a. Ever married/lived with partner  
.a .a. Ever married/lived with partner  
.a .a. Ever married/lived with partner

-----  
bl\_204 204: Age started living with first spouse/partner  
-----

type: numeric (byte)  
label: bl\_204, but 33 nonmissing values are not labeled

range: [6,88] units: 1  
unique values: 34 missing .: 0/4168  
unique mv codes: 3 missing .\*: 1707/4168

examples: 19  
23  
.a .a. Never married/lived with partner  
.a .a. Never married/lived with partner

-----  
bl\_205 205: Currently married or living together  
-----

type: numeric (byte)  
label: bl\_205

range: [0,2] units: 1  
unique values: 3 missing .: 0/4168  
unique mv codes: 2 missing .\*: 1706/4168

tabulation: Freq. Numeric Label  
464 0 0. No  
1922 1 1. Yes, married  
76 2 2. Yes, living with partner  
1705 .a .a. Never married/lived with partner  
1 .m .m. Missing

-----  
bl\_206 206: Current partner same person as first partner  
-----

type: numeric (byte)  
label: bl\_206

range: [0,1] units: 1  
unique values: 2 missing .: 0/4168  
unique mv codes: 3 missing .\*: 2170/4168

tabulation: Freq. Numeric Label  
385 0 0. No  
1613 1 1. Yes  
1705 .a .a. Never married/lived with partner  
464 .b .b. Not currently married/living with partner  
1 .m .m. Missing

-----  
bl\_207 207: Age started living with current partner  
-----

type: numeric (byte)  
label: bl\_207, but 38 nonmissing values are not labeled

range: [7,88] units: 1  
unique values: 39 missing .: 0/4168  
unique mv codes: 5 missing .\*: 3785/4168

```

examples: .a .a. Never married/lived with partner
          .a .a. Never married/lived with partner
          .b .b. Not currently married/living with partner
          .c .c. Current partner is first partner: see 204

```

```

-----
bl_208                                     208: Age of current partner at last birthday
-----

```

```

      type: numeric (byte)
      label: bl_208, but 50 nonmissing values are not labeled

      range: [14,88]                units: 1
      unique values: 51              missing .: 0/4168
      unique mv codes: 4             missing .*: 2174/4168

      examples: 29
                43
                .a .a. Never married/lived with partner
                .a .a. Never married/lived with partner

```

```

-----
bl_209                                     209: Current partner staying with R
-----

```

```

      type: numeric (byte)
      label: bl_209

      range: [1,2]                  units: 1
      unique values: 2              missing .: 0/4168
      unique mv codes: 4            missing .*: 2172/4168

```

```

      tabulation: Freq.  Numeric  Label
                  1864      1     1. Staying with respondent
                  132       2     2. Staying elsewhere
                  1705      .a     .a. Never married/lived with
                        partner
                  464       .b     .b. Not currently married/living
                        with partner
                   1        .m     .m. Missing
                   2        .s     .s. Skipped by participant

```

```

-----
bl_210                                     210: Current marital status
-----

```

```

      type: numeric (byte)
      label: bl_210

      range: [1,3]                  units: 1
      unique values: 3              missing .: 0/4168
      unique mv codes: 4            missing .*: 3749/4168

```

```

      tabulation: Freq.  Numeric  Label
                  36       1     1. Widowed
                  127      2     2. Divorced
                  256      3     3. Separated
                  1705      .a     .a. Never married/lived with
                        partner
                  1998      .b     .b. Currently married/living
                        with partner
                   1        .m     .m. Missing
                   45        .s     .s. Skipped by participant

```

```

-----
bl_211                                     211: Currently have primary sex partner
-----

```

```

      type: numeric (byte)

```

label: bl\_211

range: [0,1] units: 1  
 unique values: 2 missing .: 0/4168  
 unique mv codes: 4 missing .\*: 3706/4168

| tabulation: | Freq. | Numeric | Label                                     |
|-------------|-------|---------|-------------------------------------------|
|             | 191   | 0       | 0. No                                     |
|             | 271   | 1       | 1. Yes                                    |
|             | 1705  | .a      | .a. Never married/lived with partner      |
|             | 1998  | .b      | .b. Currently married/living with partner |
|             | 1     | .m      | .m. Missing                               |
|             | 2     | .s      | .s. Skipped by participant                |

-----  
 bl\_212\_m 212: Number wives/partners currently live with  
 -----

type: numeric (byte)  
 label: bl\_212, but 10 nonmissing values are not labeled

range: [1,16] units: 1  
 unique values: 10 missing .: 0/4168  
 unique mv codes: 3 missing .\*: 3535/4168

| tabulation: | Freq. | Numeric | Label                                         |
|-------------|-------|---------|-----------------------------------------------|
|             | 559   | 1       |                                               |
|             | 48    | 2       |                                               |
|             | 10    | 3       |                                               |
|             | 7     | 4       |                                               |
|             | 1     | 5       |                                               |
|             | 2     | 6       |                                               |
|             | 2     | 7       |                                               |
|             | 1     | 8       |                                               |
|             | 2     | 9       |                                               |
|             | 1     | 16      |                                               |
|             | 1197  | .a      | .a. Never married/lived with partner          |
|             | 203   | .b      | .b. Not currently married/living with partner |
|             | 2135  | .g      | .g. Gender skip pattern                       |

-----  
 bl\_213 213: Total spouses or live-in partners  
 -----

type: numeric (byte)  
 label: bl\_213, but 17 nonmissing values are not labeled

range: [1,20] units: 1  
 unique values: 17 missing .: 0/4168  
 unique mv codes: 3 missing .\*: 1715/4168

| tabulation: | Freq. | Numeric | Label |
|-------------|-------|---------|-------|
|             | 1538  | 1       |       |
|             | 523   | 2       |       |
|             | 164   | 3       |       |
|             | 88    | 4       |       |
|             | 57    | 5       |       |
|             | 22    | 6       |       |
|             | 15    | 7       |       |
|             | 14    | 8       |       |
|             | 5     | 9       |       |
|             | 14    | 10      |       |
|             | 2     | 11      |       |
|             | 1     | 12      |       |
|             | 1     | 13      |       |
|             | 3     | 15      |       |

```

      2      16
      2      19
      2      20
1705      .a  .a. Never married/lived with
           partner
      1      .m  .m. Missing
      9      .s  .s. Skipped by participant

```

-----  
bl\_300

300: Number biological children  
-----

```

      type: numeric (byte)
      label: bl_300, but 12 nonmissing values are not labeled

      range: [0,14]                units: 1
      unique values: 13            missing .: 0/4168
      unique mv codes: 1           missing .*: 1/4168

```

```

      tabulation: Freq.  Numeric  Label
                  1440      0      0. No biological children
                  869       1
                  691       2
                  451       3
                  302       4
                  197       5
                  114       6
                   51       7
                   35       8
                    9       9
                    6      10
                    1      11
                    1      14
                    1       .s  .s. Skipped by participant

```

-----  
bl\_301a

301: Number boys born  
-----

```

      type: numeric (byte)
      label: bl_301a, but 9 nonmissing values are not labeled

      range: [0,8]                units: 1
      unique values: 9            missing .: 0/4168
      unique mv codes: 2         missing .*: 1441/4168

```

```

      tabulation: Freq.  Numeric  Label
                  670      0
                  1082     1
                   601     2
                   217     3
                   106     4
                    34     5
                    13     6
                     2     7
                     2     8
                  1440     .a  .a. No biological children
                    1     .s  .s. Skipped by participant

```

-----  
bl\_301b

301: Number girls born  
-----

```

      type: numeric (byte)
      label: bl_301b, but 9 nonmissing values are not labeled

      range: [0,8]                units: 1
      unique values: 9            missing .: 0/4168
      unique mv codes: 2         missing .*: 1441/4168

```

```

tabulation: Freq.  Numeric  Label
            730      0
            1032     1
            557      2
            246      3
            114      4
            34       5
            8        6
            5        7
            1        8
            1440     .a  .a. No biological children
            1        .s  .s. Skipped by participant

```

-----  
bl\_302 302: Number children who have died  
-----

```

type: numeric (byte)
label: bl_302, but 6 nonmissing values are not labeled

range: [0,6]                units: 1
unique values: 7             missing .: 0/4168
unique mv codes: 3          missing .*: 1442/4168

```

```

tabulation: Freq.  Numeric  Label
            2211     0  0. No children have died
            361      1
            102      2
            33       3
            12       4
            5        5
            2        6
            1440     .a  .a. No biological children
            1        .m  .m. Missing
            1        .s  .s. Skipped by participant

```

-----  
bl\_303\_m 303: Number women fathered children with  
-----

```

type: numeric (byte)
label: bl_303_m, but 7 nonmissing values are not labeled

range: [1,7]                units: 1
unique values: 7             missing .: 0/4168
unique mv codes: 4          missing .*: 3298/4168

```

```

tabulation: Freq.  Numeric  Label
            678      1
            161      2
            24       3
            3        4
            1        5
            1        6
            2        7
            1161     .a  .a. No biological children
            2135     .g  .g. Gender skip pattern
            1        .m  .m. Missing
            1        .s  .s. Skipped by participant

```

-----  
bl\_304 304: Number children who live with you but aren't biological  
-----

```

type: numeric (byte)
label: num_bl, but 11 nonmissing values are not labeled

range: [0,10]              units: 1
unique values: 11          missing .: 0/4168
unique mv codes: 2        missing .*: 30/4168

```



| tabulation: | Freq. | Numeric | Label                      |
|-------------|-------|---------|----------------------------|
|             | 2337  | 0       |                            |
|             | 521   | 1       |                            |
|             | 479   | 2       |                            |
|             | 300   | 3       |                            |
|             | 213   | 4       |                            |
|             | 123   | 5       |                            |
|             | 74    | 6       |                            |
|             | 40    | 7       |                            |
|             | 25    | 8       |                            |
|             | 12    | 9       |                            |
|             | 14    | 10      |                            |
|             | 1     | .m      | .m. Missing                |
|             | 29    | .s      | .s. Skipped by participant |

-----  
bl\_305a 305: Number boys non-biological children  
-----

type: numeric (byte)  
label: bl\_305a, but 10 nonmissing values are not labeled

range: [0,9] units: 1  
unique values: 10 missing .: 0/4168  
unique mv codes: 2 missing .\*: 2367/4168

| tabulation: | Freq. | Numeric | Label                          |
|-------------|-------|---------|--------------------------------|
|             | 457   | 0       |                                |
|             | 659   | 1       |                                |
|             | 403   | 2       |                                |
|             | 173   | 3       |                                |
|             | 66    | 4       |                                |
|             | 23    | 5       |                                |
|             | 15    | 6       |                                |
|             | 3     | 7       |                                |
|             | 1     | 8       |                                |
|             | 1     | 9       |                                |
|             | 2337  | .a      | .a. No non-biological children |
|             | 30    | .s      | .s. Skipped by participant     |

-----  
bl\_305b 305: Number girls non-biological children  
-----

type: numeric (byte)  
label: bl\_305b, but 9 nonmissing values are not labeled

range: [0,8] units: 1  
unique values: 9 missing .: 0/4168  
unique mv codes: 2 missing .\*: 2367/4168

| tabulation: | Freq. | Numeric | Label                          |
|-------------|-------|---------|--------------------------------|
|             | 456   | 0       |                                |
|             | 662   | 1       |                                |
|             | 392   | 2       |                                |
|             | 175   | 3       |                                |
|             | 71    | 4       |                                |
|             | 28    | 5       |                                |
|             | 13    | 6       |                                |
|             | 1     | 7       |                                |
|             | 3     | 8       |                                |
|             | 2337  | .a      | .a. No non-biological children |
|             | 30    | .s      | .s. Skipped by participant     |

-----  
bl\_306 306: Currently pregnant  
-----

type: numeric (byte)

label: bl\_306

range: [0,88] units: 1

unique values: 3 missing .: 0/4168

unique mv codes: 4 missing .\*: 1406/4168

| tabulation: | Freq. | Numeric | Label                                                                             |
|-------------|-------|---------|-----------------------------------------------------------------------------------|
|             | 2605  | 0       | 0. No                                                                             |
|             | 127   | 1       | 1. Yes                                                                            |
|             | 30    | 88      | 88. Don't Know                                                                    |
|             | 1196  | .a      | .a. Males: Never married/lived with partner                                       |
|             | 204   | .b      | .b. Males: Not currently married/living with partner                              |
|             | 2     | .c      | .c. Males: Reported no wife/partner on this question (bl_209 == 2 for both cases) |
|             | 4     | .s      | .s. Skipped by participant                                                        |

-----

bl\_307a 307: Pregnant: After child you are expecting, want more children

-----

type: numeric (byte)

label: bl\_307a

range: [0,88] units: 1

unique values: 4 missing .: 0/4168

unique mv codes: 6 missing .\*: 4043/4168

| tabulation: | Freq. | Numeric | Label                                                                   |
|-------------|-------|---------|-------------------------------------------------------------------------|
|             | 44    | 0       | 0. Want no more/none                                                    |
|             | 74    | 1       | 1. Yes, have another child                                              |
|             | 1     | 2       | 2. Can't have children                                                  |
|             | 6     | 88      | 88. Undecided/Don't know                                                |
|             | 1183  | .a      | .a. Males: Never married/lived with partner                             |
|             | 204   | .b      | .b. Males: Not currently married/living with partner                    |
|             | 2     | .c      | .c. Males: Reported no wife/partner on 306 (bl_209 == 2 for both cases) |
|             | 2635  | .d      | .d. Females/Males: Reported not pregnant or don't know in 306           |
|             | 13    | .e      | .e. Skip error: Programming error                                       |
|             | 6     | .s      | .s. Skipped by participant                                              |

-----

bl\_307b 307: Not pregnant/No partner pregnant: Want more children

-----

type: numeric (byte)

label: bl\_307b

range: [0,88] units: 1

unique values: 4 missing .: 0/4168

unique mv codes: 4 missing .\*: 271/4168

| tabulation: | Freq. | Numeric | Label                                       |
|-------------|-------|---------|---------------------------------------------|
|             | 903   | 0       | 0. Want no more/none                        |
|             | 2589  | 1       | 1. Yes, have another child                  |
|             | 55    | 2       | 2. Can't have children                      |
|             | 350   | 88      | 88. Undecided/Don't know                    |
|             | 127   | .d      | .d. Females/Males: Reported pregnant in 306 |
|             | 13    | .e      | .e. Skip error: Programming error           |
|             | 1     | .m      | .m. Missing                                 |
|             | 130   | .s      | .s. Skipped by participant                  |

-----  
bl\_308 308: How long want to wait before birth of another child  
-----

type: numeric (byte)  
label: bl\_308

range: [1,88] units: 1  
unique values: 50 missing .: 0/4168  
unique mv codes: 2 missing .\*: 1493/4168

examples: 28 28. 3 Years  
32 32. 5 Years  
87 87. Other  
.a .a. Want no more children, can't have children, or don't know i

> f want more children

-----  
bl\_309a 309: Heard of: Female sterilization  
-----

type: numeric (byte)  
label: bl\_309a

range: [0,1] units: 1  
unique values: 2 missing .: 0/4168  
unique mv codes: 1 missing .\*: 509/4168

tabulation: Freq. Numeric Label  
1746 0 0. No  
1913 1 1. Yes  
509 .e .e. Skip error: Males who  
answered 0,2,88 on 307 skipped  
to 400

-----  
bl\_309b 309: Heard of: Male sterilization  
-----

type: numeric (byte)  
label: bl\_309b

range: [0,1] units: 1  
unique values: 2 missing .: 0/4168  
unique mv codes: 1 missing .\*: 509/4168

tabulation: Freq. Numeric Label  
2671 0 0. No  
988 1 1. Yes  
509 .e .e. Skip error: Males who  
answered 0,2,88 on 307 skipped  
to 400

-----  
bl\_309c 309: Heard of: Pill  
-----

type: numeric (byte)  
label: bl\_309c

range: [0,1] units: 1  
unique values: 2 missing .: 0/4168  
unique mv codes: 1 missing .\*: 509/4168

tabulation: Freq. Numeric Label  
332 0 0. No  
3327 1 1. Yes  
509 .e .e. Skip error: Males who  
answered 0,2,88 on 307 skipped

to 400

bl\_309d

309: Heard of: IUD

-----  
type: numeric (byte)  
label: bl\_309d  
  
range: [0,1] units: 1  
unique values: 2 missing .: 0/4168  
unique mv codes: 1 missing .\*: 509/4168  
  
tabulation: Freq. Numeric Label  
1676 0 0. No  
1983 1 1. Yes  
509 .e .e. Skip error: Males who  
answered 0,2,88 on 307 skipped  
to 400  
-----

bl\_309e

309: Heard of: Injectables

-----  
type: numeric (byte)  
label: bl\_309e  
  
range: [0,1] units: 1  
unique values: 2 missing .: 0/4168  
unique mv codes: 2 missing .\*: 510/4168  
  
tabulation: Freq. Numeric Label  
388 0 0. No  
3270 1 1. Yes  
509 .e .e. Skip error: Males who  
answered 0,2,88 on 307 skipped  
to 400  
1 .m .m. Missing  
-----

bl\_309f

309: Heard of: Implants

-----  
type: numeric (byte)  
label: bl\_309f  
  
range: [0,1] units: 1  
unique values: 2 missing .: 0/4168  
unique mv codes: 1 missing .\*: 509/4168  
  
tabulation: Freq. Numeric Label  
1001 0 0. No  
2658 1 1. Yes  
509 .e .e. Skip error: Males who  
answered 0,2,88 on 307 skipped  
to 400  
-----

bl\_309g

309: Heard of: Male condom

-----  
type: numeric (byte)  
label: bl\_309g  
  
range: [0,1] units: 1  
unique values: 2 missing .: 0/4168  
unique mv codes: 1 missing .\*: 509/4168  
  
tabulation: Freq. Numeric Label  
82 0 0. No  
-----

3577 1 1. Yes  
509 .e .e. Skip error: Males who  
answered 0,2,88 on 307 skipped  
to 400

-----  
bl\_309h 309: Heard of: Female condom  
-----

type: numeric (byte)  
label: bl\_309h  
  
range: [0,1] units: 1  
unique values: 2 missing .: 0/4168  
unique mv codes: 2 missing .\*: 510/4168

| tabulation: | Freq. | Numeric | Label                                                                 |
|-------------|-------|---------|-----------------------------------------------------------------------|
|             | 569   | 0       | 0. No                                                                 |
|             | 3089  | 1       | 1. Yes                                                                |
|             | 509   | .e      | .e. Skip error: Males who<br>answered 0,2,88 on 307 skipped<br>to 400 |
|             | 1     | .s      | .s. Skipped by participant                                            |

-----  
bl\_309k 309: Heard of: Lactational amenorrhea method  
-----

type: numeric (byte)  
label: bl\_309k  
  
range: [0,1] units: 1  
unique values: 2 missing .: 0/4168  
unique mv codes: 2 missing .\*: 510/4168

| tabulation: | Freq. | Numeric | Label                                                                 |
|-------------|-------|---------|-----------------------------------------------------------------------|
|             | 2524  | 0       | 0. No                                                                 |
|             | 1134  | 1       | 1. Yes                                                                |
|             | 509   | .e      | .e. Skip error: Males who<br>answered 0,2,88 on 307 skipped<br>to 400 |
|             | 1     | .s      | .s. Skipped by participant                                            |

-----  
bl\_309l 309: Heard of: Rhythm method  
-----

type: numeric (byte)  
label: bl\_309l  
  
range: [0,1] units: 1  
unique values: 2 missing .: 0/4168  
unique mv codes: 1 missing .\*: 509/4168

| tabulation: | Freq. | Numeric | Label                                                                 |
|-------------|-------|---------|-----------------------------------------------------------------------|
|             | 1470  | 0       | 0. No                                                                 |
|             | 2189  | 1       | 1. Yes                                                                |
|             | 509   | .e      | .e. Skip error: Males who<br>answered 0,2,88 on 307 skipped<br>to 400 |

-----  
bl\_309m 309: Heard of: Withdrawal  
-----

type: numeric (byte)  
label: bl\_309m  
  
range: [0,1] units: 1  
unique values: 2 missing .: 0/4168

unique mv codes: 1 missing .\*: 509/4168

| tabulation: | Freq. | Numeric | Label                                                           |
|-------------|-------|---------|-----------------------------------------------------------------|
|             | 733   | 0       | 0. No                                                           |
|             | 2926  | 1       | 1. Yes                                                          |
|             | 509   | .e      | .e. Skip error: Males who answered 0,2,88 on 307 skipped to 400 |

-----  
bl\_309n 309: Heard of: Other method  
-----

type: numeric (byte)  
label: bl\_309n

range: [0,1] units: 1  
unique values: 2 missing .: 0/4168  
unique mv codes: 1 missing .\*: 509/4168

| tabulation: | Freq. | Numeric | Label                                                           |
|-------------|-------|---------|-----------------------------------------------------------------|
|             | 3151  | 0       | 0. No                                                           |
|             | 508   | 1       | 1. Yes                                                          |
|             | 509   | .e      | .e. Skip error: Males who answered 0,2,88 on 307 skipped to 400 |

-----  
bl\_310a\_f 310: Ever had operation: Female sterilization  
-----

type: numeric (byte)  
label: bl\_310a\_f

range: [0,1] units: 1  
unique values: 2 missing .: 0/4168  
unique mv codes: 4 missing .\*: 3092/4168

| tabulation: | Freq. | Numeric | Label                                                           |
|-------------|-------|---------|-----------------------------------------------------------------|
|             | 1039  | 0       | 0. No                                                           |
|             | 37    | 1       | 1. Yes                                                          |
|             | 1037  | .a      | .a. Never heard of method                                       |
|             | 21    | .b      | .b. Currently pregnant                                          |
|             | 1     | .e      | .e. Skip error: Males who answered 0,2,88 on 307 skipped to 400 |
|             | 2033  | .g      | .g. Gender skip pattern                                         |

-----  
bl\_310b\_m 310: Ever had operation: Male sterilization  
-----

type: numeric (byte)  
label: bl\_310b\_m

range: [0,1] units: 1  
unique values: 2 missing .: 0/4168  
unique mv codes: 4 missing .\*: 3669/4168

| tabulation: | Freq. | Numeric | Label                                                           |
|-------------|-------|---------|-----------------------------------------------------------------|
|             | 492   | 0       | 0. No                                                           |
|             | 7     | 1       | 1. Yes                                                          |
|             | 1024  | .a      | .a. Never heard of method                                       |
|             | 508   | .e      | .e. Skip error: Males who answered 0,2,88 on 307 skipped to 400 |
|             | 2135  | .g      | .g. Gender skip pattern                                         |
|             | 2     | .m      | .m. Missing                                                     |

bl\_310c\_f

310: Ever used: Pill

```

type: numeric (byte)
label: bl_310c_f

range: [0,1]                units: 1
unique values: 2            missing .: 0/4168
unique mv codes: 4         missing .*: 2160/4168

```

```

tabulation: Freq.  Numeric  Label
            869      0      0. No
            1139     1      1. Yes
            125      .a     .a. Never heard of method
              1      .e     .e. Skip error: Males who
                    answered 0,2,88 on 307 skipped
                    to 400
            2033     .g     .g. Gender skip pattern
              1      .m     .m. Missing

```

bl\_310d\_f

310: Ever used: IUD

```

type: numeric (byte)
label: bl_310d_f

range: [0,1]                units: 1
unique values: 2            missing .: 0/4168
unique mv codes: 3         missing .*: 2722/4168

```

```

tabulation: Freq.  Numeric  Label
            1332     0      0. No
            114      1      1. Yes
            688      .a     .a. Never heard of method
              1      .e     .e. Skip error: Males who
                    answered 0,2,88 on 307 skipped
                    to 400
            2033     .g     .g. Gender skip pattern

```

bl\_310e\_f

310: Ever used: Injectables

```

type: numeric (byte)
label: bl_310e_f

range: [0,1]                units: 1
unique values: 2            missing .: 0/4168
unique mv codes: 4         missing .*: 2200/4168

```

```

tabulation: Freq.  Numeric  Label
            990      0      0. No
            978      1      1. Yes
            165      .a     .a. Never heard of method
              1      .e     .e. Skip error: Males who
                    answered 0,2,88 on 307 skipped
                    to 400
            2033     .g     .g. Gender skip pattern
              1      .m     .m. Missing

```

bl\_310f\_f

310: Ever used: Implants

```

type: numeric (byte)
label: bl_310f_f

range: [0,1]                units: 1
unique values: 2            missing .: 0/4168

```

unique mv codes: 3 missing .\*: 2410/4168

| tabulation: | Freq. | Numeric | Label                                                           |
|-------------|-------|---------|-----------------------------------------------------------------|
|             | 1469  | 0       | 0. No                                                           |
|             | 289   | 1       | 1. Yes                                                          |
|             | 376   | .a      | .a. Never heard of method                                       |
|             | 1     | .e      | .e. Skip error: Males who answered 0,2,88 on 307 skipped to 400 |
|             | 2033  | .g      | .g. Gender skip pattern                                         |

-----  
bl\_310g 310: Ever used: Male condom  
-----

type: numeric (byte)  
label: bl\_310g

range: [0,1] units: 1  
unique values: 2 missing .: 0/4168  
unique mv codes: 2 missing .\*: 591/4168

| tabulation: | Freq. | Numeric | Label                                                           |
|-------------|-------|---------|-----------------------------------------------------------------|
|             | 595   | 0       | 0. No                                                           |
|             | 2982  | 1       | 1. Yes                                                          |
|             | 82    | .a      | .a. Never heard of method                                       |
|             | 509   | .e      | .e. Skip error: Males who answered 0,2,88 on 307 skipped to 400 |

-----  
bl\_310h\_f 310: Ever used: Female condom  
-----

type: numeric (byte)  
label: bl\_310h\_f

range: [0,1] units: 1  
unique values: 2 missing .: 0/4168  
unique mv codes: 5 missing .\*: 2429/4168

| tabulation: | Freq. | Numeric | Label                                                           |
|-------------|-------|---------|-----------------------------------------------------------------|
|             | 1533  | 0       | 0. No                                                           |
|             | 206   | 1       | 1. Yes                                                          |
|             | 393   | .a      | .a. Never heard of method                                       |
|             | 1     | .e      | .e. Skip error: Males who answered 0,2,88 on 307 skipped to 400 |
|             | 2033  | .g      | .g. Gender skip pattern                                         |
|             | 1     | .m      | .m. Missing                                                     |
|             | 1     | .s      | .s. Skipped by participant                                      |

-----  
bl\_310k\_f 310: Ever used: Lactational amenorrhea method  
-----

type: numeric (byte)  
label: bl\_310k\_f

range: [0,1] units: 1  
unique values: 2 missing .: 0/4168  
unique mv codes: 4 missing .\*: 3375/4168

| tabulation: | Freq. | Numeric | Label                                                           |
|-------------|-------|---------|-----------------------------------------------------------------|
|             | 511   | 0       | 0. No                                                           |
|             | 282   | 1       | 1. Yes                                                          |
|             | 1340  | .a      | .a. Never heard of method                                       |
|             | 1     | .e      | .e. Skip error: Males who answered 0,2,88 on 307 skipped to 400 |



2033 .g .g. Gender skip pattern  
1 .s .s. Skipped by participant

-----  
bl\_310l 310: Ever used: Rhythm method  
-----

type: numeric (byte)  
label: bl\_310l  
  
range: [0,1] units: 1  
unique values: 2 missing .: 0/4168  
unique mv codes: 4 missing .\*: 1946/4168

| tabulation: | Freq. | Numeric | Label                                                                 |
|-------------|-------|---------|-----------------------------------------------------------------------|
|             | 1165  | 0       | 0. No                                                                 |
|             | 1057  | 1       | 1. Yes                                                                |
|             | 1422  | .a      | .a. Never heard of method                                             |
|             | 509   | .e      | .e. Skip error: Males who<br>answered 0,2,88 on 307 skipped<br>to 400 |
|             | 7     | .m      | .m. Missing                                                           |
|             | 8     | .s      | .s. Skipped by participant                                            |

-----  
bl\_310m 310: Ever used: Withdrawal  
-----

type: numeric (byte)  
label: bl\_310m  
  
range: [0,1] units: 1  
unique values: 2 missing .: 0/4168  
unique mv codes: 3 missing .\*: 1243/4168

| tabulation: | Freq. | Numeric | Label                                                                 |
|-------------|-------|---------|-----------------------------------------------------------------------|
|             | 1089  | 0       | 0. No                                                                 |
|             | 1836  | 1       | 1. Yes                                                                |
|             | 733   | .a      | .a. Never heard of method                                             |
|             | 509   | .e      | .e. Skip error: Males who<br>answered 0,2,88 on 307 skipped<br>to 400 |
|             | 1     | .s      | .s. Skipped by participant                                            |

-----  
bl\_310n 310: Ever used: Other method  
-----

type: numeric (byte)  
label: bl\_310n  
  
range: [0,1] units: 1  
unique values: 2 missing .: 0/4168  
unique mv codes: 3 missing .\*: 3661/4168

| tabulation: | Freq. | Numeric | Label                                                                 |
|-------------|-------|---------|-----------------------------------------------------------------------|
|             | 323   | 0       | 0. No                                                                 |
|             | 184   | 1       | 1. Yes                                                                |
|             | 3151  | .a      | .a. Never heard of method                                             |
|             | 509   | .e      | .e. Skip error: Males who<br>answered 0,2,88 on 307 skipped<br>to 400 |
|             | 1     | .s      | .s. Skipped by participant                                            |

-----  
bl\_311 311: Currently doing something to avoid pregnancy  
-----

type: numeric (byte)  
label: bl\_311

range: [0,1] units: 1  
 unique values: 2 missing .: 0/4168  
 unique mv codes: 6 missing .\*: 800/4168

| tabulation: | Freq. | Numeric | Label                                                           |
|-------------|-------|---------|-----------------------------------------------------------------|
|             | 1475  | 0       | 0. No                                                           |
|             | 1893  | 1       | 1. Yes                                                          |
|             | 55    | .a      | .a. Can't have children                                         |
|             | 127   | .b      | .b. Currently pregnant                                          |
|             | 85    | .c      | .c. Wants children now                                          |
|             | 458   | .e      | .e. Skip error: Males who answered 0,2,88 on 307 skipped to 400 |
|             | 30    | .m      | .m. Missing                                                     |
|             | 45    | .s      | .s. Skipped by participant                                      |

bl\_311:

1. 29 cases made NO who originally reported YES to bl\_311, but said NO to all methods in bl\_313.

-----  
 bl\_312 312: Know place to get family planning  
 -----

type: numeric (byte)  
 label: bl\_312

range: [0,1] units: 1  
 unique values: 2 missing .: 0/4168  
 unique mv codes: 3 missing .\*: 2431/4168

| tabulation: | Freq. | Numeric | Label                                                           |
|-------------|-------|---------|-----------------------------------------------------------------|
|             | 382   | 0       | 0. No                                                           |
|             | 1355  | 1       | 1. Yes                                                          |
|             | 1893  | .a      | .a. Currently using method to delay pregnancy                   |
|             | 509   | .e      | .e. Skip error: Males who answered 0,2,88 on 307 skipped to 400 |
|             | 29    | .m      | .m. Missing                                                     |

-----  
 bl\_313a 313: Currently using: Female sterilization  
 -----

type: numeric (byte)  
 label: bl\_313a

range: [0,1] units: 1  
 unique values: 2 missing .: 0/4168  
 unique mv codes: 7 missing .\*: 2277/4168

| tabulation: | Freq. | Numeric | Label                                                           |
|-------------|-------|---------|-----------------------------------------------------------------|
|             | 1884  | 0       | 0. No                                                           |
|             | 7     | 1       | 1. Yes                                                          |
|             | 55    | .a      | .a. Can't have children                                         |
|             | 127   | .b      | .b. Currently pregnant                                          |
|             | 85    | .c      | .c. Wants children now                                          |
|             | 1475  | .d      | .d. Not currently using family planning                         |
|             | 458   | .e      | .e. Skip error: Males who answered 0,2,88 on 307 skipped to 400 |
|             | 32    | .m      | .m. Missing                                                     |
|             | 45    | .s      | .s. Skipped by participant                                      |

-----  
 bl\_313b 313: Currently using: Male sterilization  
 -----

```

type: numeric (byte)
label: bl_313b

range: [0,1]
unique values: 2
unique mv codes: 7

units: 1
missing .: 0/4168
missing .*: 2277/4168

```

```

tabulation: Freq.  Numeric  Label
1887        0      0. No
4           1      1. Yes
55          .a     .a. Can't have children
127         .b     .b. Currently pregnant
85          .c     .c. Wants children now
1475        .d     .d. Not currently using family
           planning
458         .e     .e. Skip error: Males who
           answered 0,2,88 on 307 skipped
           to 400
32          .m     .m. Missing
45          .s     .s. Skipped by participant

```

```

-----
bl_313c                                     313: Currently using: Pill
-----

```

```

type: numeric (byte)
label: bl_313c

range: [0,1]
unique values: 2
unique mv codes: 7

units: 1
missing .: 0/4168
missing .*: 2277/4168

```

```

tabulation: Freq.  Numeric  Label
1574        0      0. No
317         1      1. Yes
55          .a     .a. Can't have children
127         .b     .b. Currently pregnant
85          .c     .c. Wants children now
1475        .d     .d. Not currently using family
           planning
458         .e     .e. Skip error: Males who
           answered 0,2,88 on 307 skipped
           to 400
32          .m     .m. Missing
45          .s     .s. Skipped by participant

```

```

-----
bl_313d                                     313: Currently using: IUD
-----

```

```

type: numeric (byte)
label: bl_313d

range: [0,1]
unique values: 2
unique mv codes: 7

units: 1
missing .: 0/4168
missing .*: 2277/4168

```

```

tabulation: Freq.  Numeric  Label
1849        0      0. No
42          1      1. Yes
55          .a     .a. Can't have children
127         .b     .b. Currently pregnant
85          .c     .c. Wants children now
1475        .d     .d. Not currently using family
           planning
458         .e     .e. Skip error: Males who
           answered 0,2,88 on 307 skipped
           to 400
32          .m     .m. Missing

```

45 .s .s. Skipped by participant

-----  
bl\_313e 313: Currently using: Injectables  
-----

type: numeric (byte)  
label: bl\_313e  
  
range: [0,1] units: 1  
unique values: 2 missing .: 0/4168  
unique mv codes: 7 missing .\*: 2277/4168

| tabulation: | Freq. | Numeric | Label                                                           |
|-------------|-------|---------|-----------------------------------------------------------------|
|             | 1551  | 0       | 0. No                                                           |
|             | 340   | 1       | 1. Yes                                                          |
|             | 55    | .a      | .a. Can't have children                                         |
|             | 127   | .b      | .b. Currently pregnant                                          |
|             | 85    | .c      | .c. Wants children now                                          |
|             | 1475  | .d      | .d. Not currently using family planning                         |
|             | 458   | .e      | .e. Skip error: Males who answered 0,2,88 on 307 skipped to 400 |
|             | 32    | .m      | .m. Missing                                                     |
|             | 45    | .s      | .s. Skipped by participant                                      |

-----  
bl\_313f 313: Currently using: Implants  
-----

type: numeric (byte)  
label: bl\_313f  
  
range: [0,1] units: 1  
unique values: 2 missing .: 0/4168  
unique mv codes: 7 missing .\*: 2277/4168

| tabulation: | Freq. | Numeric | Label                                                           |
|-------------|-------|---------|-----------------------------------------------------------------|
|             | 1726  | 0       | 0. No                                                           |
|             | 165   | 1       | 1. Yes                                                          |
|             | 55    | .a      | .a. Can't have children                                         |
|             | 127   | .b      | .b. Currently pregnant                                          |
|             | 85    | .c      | .c. Wants children now                                          |
|             | 1475  | .d      | .d. Not currently using family planning                         |
|             | 458   | .e      | .e. Skip error: Males who answered 0,2,88 on 307 skipped to 400 |
|             | 32    | .m      | .m. Missing                                                     |
|             | 45    | .s      | .s. Skipped by participant                                      |

-----  
bl\_313g 313: Currently using: Male condom  
-----

type: numeric (byte)  
label: bl\_313g  
  
range: [0,1] units: 1  
unique values: 2 missing .: 0/4168  
unique mv codes: 7 missing .\*: 2277/4168

| tabulation: | Freq. | Numeric | Label                          |
|-------------|-------|---------|--------------------------------|
|             | 891   | 0       | 0. No                          |
|             | 1000  | 1       | 1. Yes                         |
|             | 55    | .a      | .a. Can't have children        |
|             | 127   | .b      | .b. Currently pregnant         |
|             | 85    | .c      | .c. Wants children now         |
|             | 1475  | .d      | .d. Not currently using family |

```

planning
458 .e .e. Skip error: Males who
      answered 0,2,88 on 307 skipped
      to 400
32 .m .m. Missing
45 .s .s. Skipped by participant

```

-----  
bl\_313h

313: Currently using: Female condom  
-----

```

type: numeric (byte)
label: bl_313h

range: [0,1]          units: 1
unique values: 2      missing .: 0/4168
unique mv codes: 7    missing .*: 2277/4168

```

```

tabulation: Freq.  Numeric  Label
1842         0  0. No
49           1  1. Yes
55          .a  .a. Can't have children
127         .b  .b. Currently pregnant
85          .c  .c. Wants children now
1475        .d  .d. Not currently using family
           planning
458         .e  .e. Skip error: Males who
           answered 0,2,88 on 307 skipped
           to 400
32          .m  .m. Missing
45          .s  .s. Skipped by participant

```

-----  
bl\_313i

313: Currently using: Diaphragm  
-----

```

type: numeric (byte)
label: bl_313i

range: [0,1]          units: 1
unique values: 2      missing .: 0/4168
unique mv codes: 7    missing .*: 2277/4168

```

```

tabulation: Freq.  Numeric  Label
1890         0  0. No
1           1  1. Yes
55          .a  .a. Can't have children
127         .b  .b. Currently pregnant
85          .c  .c. Wants children now
1475        .d  .d. Not currently using family
           planning
458         .e  .e. Skip error: Males who
           answered 0,2,88 on 307 skipped
           to 400
32          .m  .m. Missing
45          .s  .s. Skipped by participant

```

-----  
bl\_313j

313: Currently using: Foam/Jelly  
-----

```

type: numeric (byte)
label: bl_313j

range: [0,1]          units: 1
unique values: 2      missing .: 0/4168
unique mv codes: 7    missing .*: 2277/4168

```

```

tabulation: Freq.  Numeric  Label
1890         0  0. No

```

```

      1      1 1. Yes
     55     .a .a. Can't have children
    127     .b .b. Currently pregnant
     85     .c .c. Wants children now
   1475     .d .d. Not currently using family
                planning
     458     .e .e. Skip error: Males who
                answered 0,2,88 on 307 skipped
                to 400
      32     .m .m. Missing
      45     .s .s. Skipped by participant

```

```

-----
bl_313k                                     313: Ever used: Lactational amenorrhea method
-----

```

```

      type: numeric (byte)
      label: bl_313k

      range: [0,1]                units: 1
  unique values: 2                missing .: 0/4168
  unique mv codes: 7             missing .*: 2277/4168

```

```

  tabulation: Freq.  Numeric  Label
              1879      0      0. No
                12      1      1. Yes
                 55     .a     .a. Can't have children
                127     .b     .b. Currently pregnant
                 85     .c     .c. Wants children now
               1475     .d     .d. Not currently using family
                        planning
                 458     .e     .e. Skip error: Males who
                        answered 0,2,88 on 307 skipped
                        to 400
                 32     .m     .m. Missing
                 45     .s     .s. Skipped by participant

```

```

-----
bl_3131                                     313: Ever used: Rhythm method
-----

```

```

      type: numeric (byte)
      label: bl_3131

      range: [0,1]                units: 1
  unique values: 2                missing .: 0/4168
  unique mv codes: 7             missing .*: 2277/4168

```

```

  tabulation: Freq.  Numeric  Label
              1767      0      0. No
                124      1      1. Yes
                 55     .a     .a. Can't have children
                127     .b     .b. Currently pregnant
                 85     .c     .c. Wants children now
               1475     .d     .d. Not currently using family
                        planning
                 458     .e     .e. Skip error: Males who
                        answered 0,2,88 on 307 skipped
                        to 400
                 32     .m     .m. Missing
                 45     .s     .s. Skipped by participant

```

```

-----
bl_313m                                     313: Ever used: Withdrawal
-----

```

```

      type: numeric (byte)
      label: bl_313m

      range: [0,1]                units: 1

```

unique values: 2 missing .: 0/4168  
unique mv codes: 7 missing .\*: 2277/4168

tabulation: Freq. Numeric Label

|      |    |                                                                 |
|------|----|-----------------------------------------------------------------|
| 1666 | 0  | 0. No                                                           |
| 225  | 1  | 1. Yes                                                          |
| 55   | .a | .a. Can't have children                                         |
| 127  | .b | .b. Currently pregnant                                          |
| 85   | .c | .c. Wants children now                                          |
| 1475 | .d | .d. Not currently using family planning                         |
| 458  | .e | .e. Skip error: Males who answered 0,2,88 on 307 skipped to 400 |
| 32   | .m | .m. Missing                                                     |
| 45   | .s | .s. Skipped by participant                                      |

---

bl\_313n 313: Ever used: Other method

---

type: numeric (byte)  
label: bl\_313n

range: [0,1] units: 1  
unique values: 2 missing .: 0/4168  
unique mv codes: 7 missing .\*: 2277/4168

tabulation: Freq. Numeric Label

|      |    |                                                                 |
|------|----|-----------------------------------------------------------------|
| 1860 | 0  | 0. No                                                           |
| 31   | 1  | 1. Yes                                                          |
| 55   | .a | .a. Can't have children                                         |
| 127  | .b | .b. Currently pregnant                                          |
| 85   | .c | .c. Wants children now                                          |
| 1475 | .d | .d. Not currently using family planning                         |
| 458  | .e | .e. Skip error: Males who answered 0,2,88 on 307 skipped to 400 |
| 32   | .m | .m. Missing                                                     |
| 45   | .s | .s. Skipped by participant                                      |

---

bl\_314\_f 314: Past month, how many days forgot pill

---

type: numeric (byte)  
label: bl\_314, but 11 nonmissing values are not labeled

range: [0,88] units: 1  
unique values: 12 missing .: 0/4168  
unique mv codes: 9 missing .\*: 3949/4168

tabulation: Freq. Numeric Label

|     |    |                                |
|-----|----|--------------------------------|
| 141 | 0  |                                |
| 17  | 1  |                                |
| 21  | 2  |                                |
| 11  | 3  |                                |
| 6   | 4  |                                |
| 3   | 5  |                                |
| 3   | 6  |                                |
| 6   | 7  |                                |
| 1   | 14 |                                |
| 1   | 20 |                                |
| 2   | 30 |                                |
| 7   | 88 | 88. Don't Know                 |
| 35  | .a | .a. Can't have children        |
| 45  | .b | .b. Currently pregnant         |
| 54  | .c | .c. Wants children now         |
| 971 | .d | .d. Not currently using family |

```

      1      .e .e. Skip pattern error
    808      .f .f. Not using pill: Using other
           method of family planning
    2033      .g .g. Gender skip pattern
      1      .m .m. Missing
      1      .s .s. Skipped by participant

```

-----  
bl\_315

315: Past month, how many times sex without condom  
-----

```

      type: numeric (byte)
      label: bl_315, but 8 nonmissing values are not labeled

      range: [0,88]                units: 1
  unique values: 9                missing .: 0/4168
  unique mv codes: 7              missing .*: 4124/4168

```

```

  tabulation: Freq.  Numeric  Label
              13        0
              10        1
               7        2
               5        3
               1        4
               1        6
               2        7
               1       14
               4       88  88. Don't Know
              55       .a  .a. Can't have children
             127       .b  .b. Currently pregnant
              85       .c  .c. Wants children now
            1475       .d  .d. Not currently using family
                   planning
              458       .e  .e. Skip pattern error
            1849       .f  .f. Not using condom: Using
                   other method of family planning
               75       .m  .m. Missing

```

-----  
bl\_400

400: Perceived risk of getting HIV  
-----

```

      type: numeric (byte)
      label: bl_400

      range: [0,88]                units: 1
  unique values: 6                missing .: 0/4168
  unique mv codes: 1              missing .*: 7/4168

```

```

  tabulation: Freq.  Numeric  Label
              880        0  0. No risk
              942        1  1. Low
              895        2  2. Moderate
              970        3  3. High
               82        4  4. HIV+
              392       88  88. Don't know
               7        .s  .s. Skipped by participant

```

-----  
bl\_401

401: Ever tested for HIV  
-----

```

      type: numeric (byte)
      label: yesno_bl

      range: [0,1]                units: 1
  unique values: 2                missing .: 0/4168

  tabulation: Freq.  Numeric  Label

```



632 0 0. No  
3536 1 1. Yes

bl\_402

402: Received results for last HIV test

type: numeric (byte)  
label: bl\_402  
range: [0,1] units: 1  
unique values: 2 missing .: 0/4168  
unique mv codes: 2 missing .\*: 633/4168

| tabulation: | Freq. | Numeric | Label                         |
|-------------|-------|---------|-------------------------------|
|             | 65    | 0       | 0. No                         |
|             | 3470  | 1       | 1. Yes                        |
|             | 632   | .a      | .a. Never been tested for HIV |
|             | 1     | .s      | .s. Skipped by participant    |

bl\_403

403: Last time tested for HIV

type: numeric (byte)  
label: bl\_403  
range: [1,88] units: 1  
unique values: 5 missing .: 0/4168  
unique mv codes: 2 missing .\*: 637/4168

| tabulation: | Freq. | Numeric | Label                         |
|-------------|-------|---------|-------------------------------|
|             | 1623  | 1       | 1. <6 months ago              |
|             | 821   | 2       | 2. 6-11 months ago            |
|             | 477   | 3       | 3. 12-23 months ago           |
|             | 507   | 4       | 4. 2+ years ago               |
|             | 103   | 88      | 88. Don't remember            |
|             | 632   | .a      | .a. Never been tested for HIV |
|             | 5     | .s      | .s. Skipped by participant    |

bl\_404

404: Ever tested with spouse/current partner for HIV

type: numeric (byte)  
label: bl\_404  
range: [0,1] units: 1  
unique values: 2 missing .: 0/4168  
unique mv codes: 3 missing .\*: 1179/4168

| tabulation: | Freq. | Numeric | Label                         |
|-------------|-------|---------|-------------------------------|
|             | 1452  | 0       | 0. No                         |
|             | 1537  | 1       | 1. Yes                        |
|             | 468   | .a      | .a. Never been tested for HIV |
|             | 705   | .b      | .b. No primary sex partner    |
|             | 6     | .s      | .s. Skipped by participant    |

bl\_405

405: Last time tested with spouse/current partner for HIV

type: numeric (byte)  
label: bl\_405  
range: [1,88] units: 1  
unique values: 5 missing .: 0/4168  
unique mv codes: 4 missing .\*: 2633/4168

| tabulation: | Freq. | Numeric | Label |
|-------------|-------|---------|-------|
|-------------|-------|---------|-------|

```

594      1  1. <6 months ago
420      2  2. 6-11 months ago
225      3  3. 12-23 months ago
233      4  4. 2+ years ago
63       88 88. Don't remember
468      .a .a. Never been tested for HIV
705      .b .b. No primary sex partner
1452     .c .c. Never been tested with
          partner
8        .s .s. Skipped by participant

```

-----  
bl\_406

406: Both received results for last HIV test  
-----

```

      type: numeric (byte)
      label: bl_406

      range: [0,1]                units: 1
      unique values: 2            missing .: 0/4168
      unique mv codes: 4          missing .*: 2632/4168

      tabulation: Freq.  Numeric  Label
                  40         0      0. No
                  1496        1      1. Yes
                  468         .a     .a. Never been tested for HIV
                  705         .b     .b. No primary sex partner
                  1452        .c     .c. Never been tested with
                              partner
                  7          .s     .s. Skipped by participant

```

-----  
bl\_407

407: Self/Partner ever screened for cervical cancer  
-----

```

      type: numeric (byte)
      label: bl_407

      range: [0,88]              units: 1
      unique values: 3            missing .: 0/4168
      unique mv codes: 3          missing .*: 2508/4168

      tabulation: Freq.  Numeric  Label
                  1264        0      0. No
                  335         1      1. Yes
                  61          88     88. Don't Know
                  479         .b     .b. Males: No primary sex
                              partner
                  2024        .e     .e. Skip error: Programming
                              error (No on 401 or 404: skip to
                              500)
                  5          .s     .s. Skipped by participant

```

-----  
bl\_408

408: Last time screened for cervical cancer  
-----

```

      type: numeric (byte)
      label: bl_408

      range: [1,88]              units: 1
      unique values: 3            missing .: 0/4168
      unique mv codes: 4          missing .*: 3785/4168

      tabulation: Freq.  Numeric  Label
                  257         1      1. <2 years ago
                  67          2      2. 2+ years ago
                  59          88     88. Don't know
                  1173        .a     .a. Never been screened for
                              cervical cancer

```

```

479      .b  .b. Males: No primary sex
           partner
2115     .e  .e. Skip error: Programming
           error (No on 401 or 404: skip to
           500)
18       .s  .s. Skipped by participant

```

-----  
bl\_500

500: Ever heard of AIDS  
-----

```

      type: numeric (byte)
      label: yesno_bl

      range: [0,1]                units: 1
unique values: 2                  missing .: 0/4168

```

```

      tabulation: Freq.  Numeric  Label
                  140      0      0. No
                  4028     1      1. Yes

```

-----  
bl\_501

501: Can reduce risk of HIV by having one uninfected sex partner  
-----

```

      type: numeric (byte)
      label: bl_501

      range: [0,88]              units: 1
unique values: 3                  missing .: 0/4168
unique mv codes: 2                missing .*: 141/4168

```

```

      tabulation: Freq.  Numeric  Label
                  442      0      0. No
                  3512     1      1. Yes
                   73      88     88. Don't Know
                   140     .a     .a. Never heard of AIDS
                    1      .s     .s. Skipped by participant

```

-----  
bl\_502

502: Can get HIV from mosquito bites  
-----

```

      type: numeric (byte)
      label: bl_502

      range: [0,88]              units: 1
unique values: 3                  missing .: 0/4168
unique mv codes: 2                missing .*: 141/4168

```

```

      tabulation: Freq.  Numeric  Label
                  3033     0      0. No
                   764     1      1. Yes
                   230     88     88. Don't Know
                   140     .a     .a. Never heard of AIDS
                    1      .s     .s. Skipped by participant

```

-----  
bl\_503

503: Can reduce risk by using condom every time  
-----

```

      type: numeric (byte)
      label: bl_503

      range: [0,88]              units: 1
unique values: 3                  missing .: 0/4168
unique mv codes: 2                missing .*: 141/4168

```

```

      tabulation: Freq.  Numeric  Label
                  687      0      0. No

```

```
3278      1  1. Yes
62        88 88. Don't Know
140       .a .a. Never heard of AIDS
1         .s .s. Skipped by participant
```

-----  
bl\_504 504: Can get HIV by sharing food with someone with AIDS  
-----

```
type: numeric (byte)
label: bl_504

range: [0,88]          units: 1
unique values: 3      missing .: 0/4168
unique mv codes: 1    missing .*: 140/4168

tabulation: Freq.  Numeric  Label
            3781      0      0. No
            188       1      1. Yes
            59        88     88. Don't Know
            140       .a     .a. Never heard of AIDS
```

-----  
bl\_505 505: Can reduce risk of HIV by not having sex  
-----

```
type: numeric (byte)
label: bl_505

range: [0,88]          units: 1
unique values: 3      missing .: 0/4168
unique mv codes: 1    missing .*: 140/4168

tabulation: Freq.  Numeric  Label
            890       0      0. No
            3103      1      1. Yes
            35        88     88. Don't Know
            140       .a     .a. Never heard of AIDS
```

-----  
bl\_506 506: Can get HIV by witchcraft or other supernatural means  
-----

```
type: numeric (byte)
label: bl_506

range: [0,88]          units: 1
unique values: 3      missing .: 0/4168
unique mv codes: 2    missing .*: 142/4168

tabulation: Freq.  Numeric  Label
            3621      0      0. No
            300       1      1. Yes
            105       88     88. Don't Know
            140       .a     .a. Never heard of AIDS
            2         .s     .s. Skipped by participant
```

-----  
bl\_507 507: Possible for healthy-looking person to have HIV  
-----

```
type: numeric (byte)
label: bl_507

range: [0,88]          units: 1
unique values: 3      missing .: 0/4168
unique mv codes: 2    missing .*: 141/4168

tabulation: Freq.  Numeric  Label
            468       0      0. No
```

3528 1 1. Yes  
31 88 88. Don't Know  
140 .a .a. Never heard of AIDS  
1 .s .s. Skipped by participant

-----  
bl\_508a 508: Pregnancy: Can virus that causes AIDS be transmitted from mother to baby  
-----

type: numeric (byte)  
label: bl\_508a

range: [0,88] units: 1  
unique values: 3 missing .: 0/4168  
unique mv codes: 2 missing .\*: 142/4168

tabulation: Freq. Numeric Label  
1405 0 0. No  
2368 1 1. Yes  
253 88 88. Don't Know  
140 .a .a. Never heard of AIDS  
2 .s .s. Skipped by participant

-----  
bl\_508b 508: Delivery: Can virus that causes AIDS be transmitted from mother to baby  
-----

type: numeric (byte)  
label: bl\_508b

range: [0,88] units: 1  
unique values: 3 missing .: 0/4168  
unique mv codes: 2 missing .\*: 142/4168

tabulation: Freq. Numeric Label  
325 0 0. No  
3530 1 1. Yes  
171 88 88. Don't Know  
140 .a .a. Never heard of AIDS  
2 .s .s. Skipped by participant

-----  
bl\_508c 508: Breastfeeding: Can virus that causes AIDS be transmitted from mother to bab  
-----

type: numeric (byte)  
label: bl\_508c

range: [0,88] units: 1  
unique values: 3 missing .: 0/4168  
unique mv codes: 2 missing .\*: 142/4168

tabulation: Freq. Numeric Label  
255 0 0. No  
3596 1 1. Yes  
175 88 88. Don't Know  
140 .a .a. Never heard of AIDS  
2 .s .s. Skipped by participant

-----  
bl\_600 600: Male circumcised: Self or Partner  
-----

type: numeric (byte)  
label: bl\_600

range: [0,88] units: 1  
unique values: 3 missing .: 0/4168  
unique mv codes: 3 missing .\*: 231/4168

| tabulation: | Freq. | Numeric | Label                               |
|-------------|-------|---------|-------------------------------------|
|             | 2648  | 0       | 0. No                               |
|             | 1260  | 1       | 1. Yes                              |
|             | 29    | 88      | 88. Don't Know                      |
|             | 226   | .b      | .b. Females: No primary sex partner |
|             | 2     | .m      | .m. Missing                         |
|             | 3     | .s      | .s. Skipped by participant          |

-----  
bl\_601

601: Male circumcised: When

-----

|                  |                |             |           |
|------------------|----------------|-------------|-----------|
| type:            | numeric (byte) |             |           |
| label:           | bl_601         |             |           |
| range:           | [1,88]         | units:      | 1         |
| unique values:   | 3              | missing .:  | 0/4168    |
| unique mv codes: | 4              | missing .*: | 2913/4168 |

| tabulation: | Freq. | Numeric | Label                               |
|-------------|-------|---------|-------------------------------------|
|             | 357   | 1       | 1. <2 yrs ago                       |
|             | 657   | 2       | 2. >2 yrs ago                       |
|             | 241   | 88      | 88. Don't Know                      |
|             | 2677  | .a      | .a. Uncircumcised                   |
|             | 226   | .b      | .b. Females: No primary sex partner |
|             | 1     | .m      | .m. Missing                         |
|             | 9     | .s      | .s. Skipped by participant          |

-----  
bl\_602

602: Male circumcised: At what age

-----

|                  |                                                  |             |           |
|------------------|--------------------------------------------------|-------------|-----------|
| type:            | numeric (byte)                                   |             |           |
| label:           | bl_602, but 50 nonmissing values are not labeled |             |           |
| range:           | [1,88]                                           | units:      | 1         |
| unique values:   | 51                                               | missing .:  | 0/4168    |
| unique mv codes: | 4                                                | missing .*: | 2988/4168 |

|           |    |     |               |
|-----------|----|-----|---------------|
| examples: | 26 |     |               |
|           | .a | .a. | Uncircumcised |
|           | .a | .a. | Uncircumcised |
|           | .a | .a. | Uncircumcised |

-----  
bl\_603

603: Male circumcised: Who performed circumcison

-----

|                  |                |             |           |
|------------------|----------------|-------------|-----------|
| type:            | numeric (byte) |             |           |
| label:           | bl_603         |             |           |
| range:           | [1,88]         | units:      | 1         |
| unique values:   | 3              | missing .:  | 0/4168    |
| unique mv codes: | 4              | missing .*: | 2914/4168 |

| tabulation: | Freq. | Numeric | Label                               |
|-------------|-------|---------|-------------------------------------|
|             | 967   | 1       | 1. Health professional              |
|             | 145   | 2       | 2. Traditional circumciser          |
|             | 142   | 88      | 88. Don't Know                      |
|             | 2677  | .a      | .a. Uncircumcised                   |
|             | 226   | .b      | .b. Females: No primary sex partner |
|             | 2     | .m      | .m. Missing                         |
|             | 9     | .s      | .s. Skipped by participant          |

-----  
bl\_604

604: MC's effect on HIV risk

```

type: numeric (byte)
label: bl_604

range: [1,88] units: 1
unique values: 4 missing .: 0/4168
unique mv codes: 2 missing .*: 3/4168

```

```

tabulation: Freq. Numeric Label
              74         1 1. Increases risk
              3673        2 2. Reduces risk
              199         3 3. Has no effect
              219        88 88. Don't Know
               2         .m .m. Missing
               1         .s .s. Skipped by participant

```

-----  
bl\_605 605: MC's effect on STD risk  
-----

```

type: numeric (byte)
label: bl_605

range: [1,88] units: 1
unique values: 4 missing .: 0/4168
unique mv codes: 2 missing .*: 3/4168

```

```

tabulation: Freq. Numeric Label
              94         1 1. Increases risk
             3693        2 2. Reduces risk
              146         3 3. Has no effect
              232        88 88. Don't Know
               1         .m .m. Missing
               2         .s .s. Skipped by participant

```

-----  
bl\_606 606: Know anyone who has had medical MC  
-----

```

type: numeric (byte)
label: yesno_bl

range: [0,1] units: 1
unique values: 2 missing .: 0/4168
unique mv codes: 2 missing .*: 4/4168

```

```

tabulation: Freq. Numeric Label
             1159         0 0. No
             3005         1 1. Yes
               1         .m .m. Missing
               3         .s .s. Skipped by participant

```

-----  
bl\_607a 607: Male circumcised: Father  
-----

```

type: numeric (byte)
label: bl_607a

range: [0,1] units: 1
unique values: 2 missing .: 0/4168
unique mv codes: 3 missing .*: 1170/4168

```

```

tabulation: Freq. Numeric Label
             2946         0 0. No
               52         1 1. Yes
             1159         .a .a. Don't know anyone who has
                    undergone medical MC
               1         .m .m. Missing
              30         .s .s. Skipped by participant

```

-----  
bl\_607b

607: Male circumcised: Son  
-----

type: numeric (byte)  
label: bl\_607b

range: [0,1] units: 1  
unique values: 2 missing .: 0/4168  
unique mv codes: 3 missing .\*: 1170/4168

tabulation: Freq. Numeric Label

|      |    |                                                       |
|------|----|-------------------------------------------------------|
| 2722 | 0  | 0. No                                                 |
| 276  | 1  | 1. Yes                                                |
| 1159 | .a | .a. Don't know anyone who has<br>undergone medical MC |
| 1    | .m | .m. Missing                                           |
| 10   | .s | .s. Skipped by participant                            |

-----  
bl\_607c

607: Male circumcised: Brother  
-----

type: numeric (byte)  
label: bl\_607c

range: [0,1] units: 1  
unique values: 2 missing .: 0/4168  
unique mv codes: 3 missing .\*: 1170/4168

tabulation: Freq. Numeric Label

|      |    |                                                       |
|------|----|-------------------------------------------------------|
| 2167 | 0  | 0. No                                                 |
| 831  | 1  | 1. Yes                                                |
| 1159 | .a | .a. Don't know anyone who has<br>undergone medical MC |
| 1    | .m | .m. Missing                                           |
| 10   | .s | .s. Skipped by participant                            |

-----  
bl\_607d

607: Male circumcised: Other male relative  
-----

type: numeric (byte)  
label: bl\_607d

range: [0,1] units: 1  
unique values: 2 missing .: 0/4168  
unique mv codes: 3 missing .\*: 1170/4168

tabulation: Freq. Numeric Label

|      |    |                                                       |
|------|----|-------------------------------------------------------|
| 1914 | 0  | 0. No                                                 |
| 1084 | 1  | 1. Yes                                                |
| 1159 | .a | .a. Don't know anyone who has<br>undergone medical MC |
| 1    | .m | .m. Missing                                           |
| 10   | .s | .s. Skipped by participant                            |

-----  
bl\_607e

607: Male circumcised: Male friend  
-----

type: numeric (byte)  
label: bl\_607e

range: [0,1] units: 1  
unique values: 2 missing .: 0/4168  
unique mv codes: 3 missing .\*: 1170/4168

tabulation: Freq. Numeric Label



```

1119      0  0. No
1879      1  1. Yes
1159      .a .a. Don't know anyone who has
           undergone medical MC
          1      .m .m. Missing
          10     .s .s. Skipped by participant

```

-----  
bl\_607f 607: Male circumcised: Other male acquaintance  
-----

```

type: numeric (byte)
label: bl_607f

range: [0,1]          units: 1
unique values: 2      missing .: 0/4168
unique mv codes: 3    missing .*: 1170/4168

```

```

tabulation: Freq.  Numeric  Label
            2098      0  0. No
             900      1  1. Yes
            1159      .a .a. Don't know anyone who has
                   undergone medical MC
                 1      .m .m. Missing
                 10     .s .s. Skipped by participant

```

-----  
bl\_608 608: Considered male circumcision: Self or Partner  
-----

```

type: numeric (byte)
label: bl_608

range: [0,1]          units: 1
unique values: 2      missing .: 0/4168
unique mv codes: 4    missing .*: 1503/4168

```

```

tabulation: Freq.  Numeric  Label
            773      0  0. No
            1892      1  1. Yes
            1260      .a .a. Self/partner circumcised
             226      .b .b. Females: No primary sex
                   partner
                 2      .m .m. Missing
                 15     .s .s. Skipped by participant

```

-----  
bl\_609 609: Main reason have not considered male circumcison  
-----

```

type: numeric (byte)
label: bl_609

range: [1,21]        units: 1
unique values: 16    missing .: 0/4168
unique mv codes: 6    missing .*: 3859/4168

```

```

tabulation: Freq.  Numeric  Label
            8        1  1. Not at risk: Married
             5        2  2. Not at risk: One partner
             2        3  3. Not at risk: Uses condoms
             8        4  4. Not at risk: Too old
            32        5  5. Not at risk: Other reason
             2        6  6. Opposed: Spouse/partner
             3        7  7. Opposed: Parent/guardian
             3        8  8. Opposed: Other person
            95        9  9. Fear: Pain, surgery
             5       10  10. Fear: Not safe
            20       11  11. Fear: Complications
             4       13  13. Time: Off non-work

```

```

          activities
          9      14 14. Time: Off work
          9      16 16. Time: Other
          6      20 20. MC not in culture/tradition
          98     21 21. Other reason
1260      .a   .a. Self/partner circumcised
226       .b   .b. Females: No primary sex
           partner
1892     .c   .c. Have considered MC
451      .e   .e. Skip error: Females with
           uncircumcised partner skipped
          15   .m .m. Missing
          15   .s .s. Skipped by participant

```

bl\_609:

1. Coding error in female survey led to few valid answers.

-----  
bl\_610

610: Know place offering MC  
-----

```

          type: numeric (byte)
          label: yesno_bl

          range: [0,1]                units: 1
          unique values: 2             missing .: 0/4168
          unique mv codes: 2           missing .*: 10/4168

```

```

tabulation: Freq.  Numeric  Label
            1064      0      0. No
            3094      1      1. Yes
              2      .m     .m. Missing
              8      .s     .s. Skipped by participant

```

-----  
bl\_611

611: Cost of transport to nearest place offering MC  
-----

```

          type: numeric (byte)
          label: bl_611

          range: [0,88]                units: 1
          unique values: 20            missing .: 0/4168
          unique mv codes: 3           missing .*: 1098/4168

```

```

tabulation: Freq.  Numeric  Label
            455      0      0. Would not cost anything
             18      1      1. <1 KR
             31      2      2. 1 KR
            186      3      3. 2 KR
            223      4      4. 3 KR
            129      5      5. 4 KR
            358      6      6. 5 KR
            600      7      7. 6-10 KR
            250      8      8. 11-15 KR
            367      9      9. 16-20 KR
             71     10     10. 21-25 KR
            108     11     11. 26-30 KR
             14     12     12. 31-35 KR
             13     13     13. 36-40 KR
              9     14     14. 41-45 KR
             41     15     15. 46-50 KR
             18     16     16. 51-100 KR
              6     17     17. 101-200 KR
              1     19     19. 301-400 KR
            172     88     88. Don't Know
           1064     .a     .a. Don't know place offering MC
              2     .m     .m. Missing
             32     .s     .s. Skipped by participant

```

-----  
bl\_612a 612: Minutes to nearest place offering MC  
-----

type: numeric (byte)  
label: bl\_612a, but 44 nonmissing values are not labeled

range: [0,88] units: 1  
unique values: 45 missing .: 0/4168  
unique mv codes: 3 missing .\*: 1097/4168

examples: 10  
25  
40  
.a .a. Don't know place offering MC

-----  
bl\_612b 612: Hours to nearest place offering MC  
-----

type: numeric (byte)  
label: bl\_612b, but 7 nonmissing values are not labeled

range: [0,88] units: 1  
unique values: 8 missing .: 0/4168  
unique mv codes: 3 missing .\*: 1097/4168

| tabulation: | Freq. | Numeric | Label                            |
|-------------|-------|---------|----------------------------------|
|             | 2353  | 0       |                                  |
|             | 382   | 1       |                                  |
|             | 77    | 2       |                                  |
|             | 13    | 3       |                                  |
|             | 1     | 4       |                                  |
|             | 1     | 5       |                                  |
|             | 2     | 6       |                                  |
|             | 242   | 88      | 88. Don't Know                   |
|             | 1064  | .a      | .a. Don't know place offering MC |
|             | 2     | .m      | .m. Missing                      |
|             | 31    | .s      | .s. Skipped by participant       |

-----  
bl\_700 700: Travel time to health facility (minutes)  
-----

type: numeric (int)  
label: nummin, but 81 nonmissing values are not labeled

range: [0,888] units: 1  
unique values: 82 missing .: 0/4168  
unique mv codes: 2 missing .\*: 27/4168

examples: 15  
30  
45  
60

-----  
bl\_701 701: Transportation mode to health facility  
-----

type: numeric (byte)  
label: bl\_701

range: [1,7] units: 1  
unique values: 7 missing .: 0/4168  
unique mv codes: 2 missing .\*: 6/4168

| tabulation: | Freq. | Numeric | Label   |
|-------------|-------|---------|---------|
|             | 1259  | 1       | 1. Bus  |
|             | 176   | 2       | 2. Taxi |

```

109      3  3. Someone drove me in private
         car
  96      4  4. Own car, self-drive
2345     5  5. Walked
163      6  6. Bicycle
  14      7  7. Other
   2      .m .m. Missing
   4      .s .s. Skipped by participant

```

bl\_702

702: Cost of transport to health facility

```

type: numeric (byte)
label: bl_702

range: [0,16]          units: 1
unique values: 17      missing .: 0/4168
unique mv codes: 3     missing .*: 2619/4168

```

```

tabulation: Freq.  Numeric  Label
            128      0  0. Nothing
              9      1  1. <1 KR
             47      2  2. 1 KR
            284      3  3. 2 KR
            253      4  4. 3 KR
            190      5  5. 4 KR
            298      6  6. 5 KR
            185      7  7. 6-10 KR
             61      8  8. 11-15 KR
             46      9  9. 16-20 KR
             17     10 10. 21-25 KR
             13     11 11. 26-30 KR
              2     12 12. 31-35 KR
              2     13 13. 36-40 KR
              1     14 14. 41-45 KR
              9     15 15. 46-50 KR
              4     16 16. 51-100 KR
           2604     .a  .a. Own car, walked, or bicycle
              2     .m  .m. Missing
             13     .s  .s. Skipped by participant

```

bl\_703

703: Distance travelled to health facility (kilometers)

```

type: numeric (int)
label: bl_703, but 40 nonmissing values are not labeled

range: [0,888]          units: 1
unique values: 42      missing .: 0/4168
unique mv codes: 2     missing .*: 38/4168

examples: 1
           4
           60
           888  888. Don't Know

```

bl\_704

704: Number people who accompanied respondent to health facility today

```

type: numeric (byte)
label: bl_704

range: [0,3]          units: 1
unique values: 4      missing .: 0/4168
unique mv codes: 2     missing .*: 3/4168

tabulation: Freq.  Numeric  Label

```

```

2690      0  0. Came alone
1149      1  1. One other person
195       2  2. Two other people
131       3  3. More than 2 other people
2         .m .m. Missing
1         .s .s. Skipped by participant

```

-----  
bl\_705 705: Relationship of 1st oldest person who came with  
-----

```

type: numeric (byte)
label: bl_705

range: [1,8] units: 1
unique values: 8 missing .: 0/4168
unique mv codes: 3 missing .*: 2693/4168

```

```

tabulation: Freq. Numeric Label
140         1  1. Spouse
71          2  2. Son/Daughter
11          3  3. Parent
22          4  4. Uncle/Aunt
2           5  5. Grandparent
1           6  6. Grandchild
401         7  7. Other relative
827         8  8. Other non-relative
2690        .a .a. Came alone
2           .m .m. Missing
1           .s .s. Skipped by participant

```

-----  
bl\_706 706: Cost of transport for 1st person, in addition to what R paid  
-----

```

type: numeric (byte)
label: bl_706

range: [0,88] units: 1
unique values: 12 missing .: 0/4168
unique mv codes: 4 missing .*: 3872/4168

```

```

tabulation: Freq. Numeric Label
221         0  0. Nothing
10          3  3. 2 KR
16          4  4. 3 KR
10          5  5. 4 KR
12          6  6. 5 KR
6           7  7. 6-10 KR
9           8  8. 11-15 KR
3           9  9. 16-20 KR
3          10 10. 21-25 KR
1          11 11. 26-30 KR
1          15 15. 46-50 KR
4          88 88. Don't Know
2690        .a .a. Came alone
1149        .e .e. Skip error: Those with 1
              other skipped out
2           .m .m. Missing
31          .s .s. Skipped by participant

```

-----  
bl\_707 707: Relationship of 2nd oldest person who came with  
-----

```

type: numeric (byte)
label: bl_707

range: [1,8] units: 1
unique values: 5 missing .: 0/4168

```

unique mv codes: 5 missing .\*: 3973/4168

| tabulation: | Freq. | Numeric | Label                                            |
|-------------|-------|---------|--------------------------------------------------|
|             | 2     | 1       | 1. Spouse                                        |
|             | 15    | 2       | 2. Son/Daughter                                  |
|             | 2     | 4       | 4. Uncle/Aunt                                    |
|             | 57    | 7       | 7. Other relative                                |
|             | 119   | 8       | 8. Other non-relative                            |
|             | 2690  | .a      | .a. Came alone                                   |
|             | 1149  | .b      | .b. Came with one person                         |
|             | 131   | .e      | .e. Skip error: Those with >2 others skipped out |
|             | 2     | .m      | .m. Missing                                      |
|             | 1     | .s      | .s. Skipped by participant                       |

-----  
bl\_708 708: Cost of transport for 2nd person, in addition to what R paid  
-----

type: numeric (byte)  
label: bl\_708

range: [0,88] units: 1  
unique values: 9 missing .: 0/4168  
unique mv codes: 5 missing .\*: 3992/4168

| tabulation: | Freq. | Numeric | Label                                            |
|-------------|-------|---------|--------------------------------------------------|
|             | 134   | 0       | 0. Nothing                                       |
|             | 6     | 3       | 3. 2 KR                                          |
|             | 10    | 4       | 4. 3 KR                                          |
|             | 5     | 5       | 5. 4 KR                                          |
|             | 8     | 6       | 6. 5 KR                                          |
|             | 4     | 7       | 7. 6-10 KR                                       |
|             | 4     | 8       | 8. 11-15 KR                                      |
|             | 1     | 9       | 9. 16-20 KR                                      |
|             | 4     | 88      | 88. Don't Know                                   |
|             | 2690  | .a      | .a. Came alone                                   |
|             | 1149  | .b      | .b. Came with one person                         |
|             | 131   | .e      | .e. Skip error: Those with >2 others skipped out |
|             | 2     | .m      | .m. Missing                                      |
|             | 20    | .s      | .s. Skipped by participant                       |

-----  
bl\_709 709: Source of money used to pay for transport and services at health facility  
-----

type: numeric (byte)  
label: bl\_709

range: [1,6] units: 1  
unique values: 6 missing .: 0/4168  
unique mv codes: 4 missing .\*: 2746/4168

| tabulation: | Freq. | Numeric | Label                             |
|-------------|-------|---------|-----------------------------------|
|             | 155   | 1       | 1. Cutting down on other expenses |
|             | 664   | 2       | 2. Savings                        |
|             | 68    | 3       | 3. Borrowing (to pay back)        |
|             | 14    | 4       | 4. Selling assets                 |
|             | 451   | 5       | 5. Donation from family/friend    |
|             | 70    | 6       | 6. Other                          |
|             | 2604  | .a      | .a. Own car, walked, or bicycle   |
|             | 128   | .b      | .b. Paid nothing for transport    |
|             | 2     | .m      | .m. Missing                       |
|             | 12    | .s      | .s. Skipped by participant        |

-----  
bl\_710 710: What respondent would be doing if not at health facility  
-----

```

    type: numeric (byte)
    label: bl_710

    range: [1,6]                units: 1
    unique values: 6            missing .: 0/4168
    unique mv codes: 2          missing .*: 11/4168

```

```

tabulation: Freq.  Numeric  Label
            621      1      1. Paid employment
            719      2      2. Own business
           1043      3      3. Unpaid work at home/Housework
            351      4      4. In school
           1139      5      5. Resting/No specific activity
            284      6      6. Other
              2      .m     .m. Missing
              9      .s     .s. Skipped by participant

```

-----

```

bl_800                800: Self-rated health in past YEAR: 1 (very bad) - 10 (very good)
-----
```

```

    type: numeric (byte)
    label: num_bl, but 10 nonmissing values are not labeled

    range: [1,10]              units: 1
    unique values: 10          missing .: 0/4168
    unique mv codes: 2         missing .*: 3/4168

```

```

tabulation: Freq.  Numeric  Label
            48      1
            23      2
            26      3
           361      4
           183      5
           159      6
          1042      7
           490      8
           507      9
          1326     10
              2      .m     .m. Missing
              1      .s     .s. Skipped by participant

```

-----

```

bl_801                801: Self-rated health in past MONTH: 1 (very bad) - 10 (very good)
-----
```

```

    type: numeric (byte)
    label: num_bl, but 10 nonmissing values are not labeled

    range: [1,10]              units: 1
    unique values: 10          missing .: 0/4168
    unique mv codes: 2         missing .*: 3/4168

```

```

tabulation: Freq.  Numeric  Label
            31      1
            29      2
            33      3
           342      4
           169      5
           172      6
           856      7
           457      8
           561      9
          1515     10
              2      .m     .m. Missing
              1      .s     .s. Skipped by participant

```

-----

```

bl_802a                802: Health problems past month: Fever
-----
```

-----  
type: numeric (byte)  
label: yesno\_bl  
  
range: [0,1] units: 1  
unique values: 2 missing .: 0/4168  
unique mv codes: 1 missing .\*: 2/4168

| tabulation: | Freq. | Numeric | Label       |
|-------------|-------|---------|-------------|
|             | 3085  | 0       | 0. No       |
|             | 1081  | 1       | 1. Yes      |
|             | 2     | .m      | .m. Missing |

-----  
bl\_802b 802: Health problems past month: Night sweat  
-----

type: numeric (byte)  
label: yesno\_bl  
  
range: [0,1] units: 1  
unique values: 2 missing .: 0/4168  
unique mv codes: 1 missing .\*: 2/4168

| tabulation: | Freq. | Numeric | Label       |
|-------------|-------|---------|-------------|
|             | 3364  | 0       | 0. No       |
|             | 802   | 1       | 1. Yes      |
|             | 2     | .m      | .m. Missing |

-----  
bl\_802c 802: Health problems past month: Rapid weight loss  
-----

type: numeric (byte)  
label: yesno\_bl  
  
range: [0,1] units: 1  
unique values: 2 missing .: 0/4168  
unique mv codes: 1 missing .\*: 2/4168

| tabulation: | Freq. | Numeric | Label       |
|-------------|-------|---------|-------------|
|             | 3657  | 0       | 0. No       |
|             | 509   | 1       | 1. Yes      |
|             | 2     | .m      | .m. Missing |

-----  
bl\_802d 802: Health problems past month: Recurring diarrhea  
-----

type: numeric (byte)  
label: yesno\_bl  
  
range: [0,1] units: 1  
unique values: 2 missing .: 0/4168  
unique mv codes: 1 missing .\*: 2/4168

| tabulation: | Freq. | Numeric | Label       |
|-------------|-------|---------|-------------|
|             | 3483  | 0       | 0. No       |
|             | 683   | 1       | 1. Yes      |
|             | 2     | .m      | .m. Missing |

-----  
bl\_802e 802: Health problems past month: Recurring coughing or shortness of breath  
-----

type: numeric (byte)  
label: yesno\_bl  
  
range: [0,1] units: 1



unique values: 2 missing .: 0/4168  
unique mv codes: 1 missing .\*: 2/4168

| tabulation: | Freq. | Numeric | Label       |
|-------------|-------|---------|-------------|
|             | 3433  | 0       | 0. No       |
|             | 733   | 1       | 1. Yes      |
|             | 2     | .m      | .m. Missing |

-----  
bl\_802f 802: Health problems past month: Recurring vomiting  
-----

type: numeric (byte)  
label: yesno\_bl

range: [0,1] units: 1  
unique values: 2 missing .: 0/4168  
unique mv codes: 1 missing .\*: 2/4168

| tabulation: | Freq. | Numeric | Label       |
|-------------|-------|---------|-------------|
|             | 3689  | 0       | 0. No       |
|             | 477   | 1       | 1. Yes      |
|             | 2     | .m      | .m. Missing |

-----  
bl\_802g 802: Health problems past month: Recurring fatigue  
-----

type: numeric (byte)  
label: yesno\_bl

range: [0,1] units: 1  
unique values: 2 missing .: 0/4168  
unique mv codes: 1 missing .\*: 2/4168

| tabulation: | Freq. | Numeric | Label       |
|-------------|-------|---------|-------------|
|             | 3503  | 0       | 0. No       |
|             | 663   | 1       | 1. Yes      |
|             | 2     | .m      | .m. Missing |

-----  
bl\_803 803: Covered by health insurance/scheme  
-----

type: numeric (byte)  
label: yesno\_bl

range: [0,88] units: 1  
unique values: 3 missing .: 0/4168  
unique mv codes: 1 missing .\*: 2/4168

| tabulation: | Freq. | Numeric | Label          |
|-------------|-------|---------|----------------|
|             | 3921  | 0       | 0. No          |
|             | 228   | 1       | 1. Yes         |
|             | 17    | 88      | 88. Don't Know |
|             | 2     | .m      | .m. Missing    |

-----  
bl\_804a 804: Health insurance: Mutual health organization/community-based health insuran  
-----

type: numeric (byte)  
label: bl\_804a

range: [0,1] units: 1  
unique values: 2 missing .: 0/4168  
unique mv codes: 3 missing .\*: 3943/4168

| tabulation: | Freq. | Numeric | Label |
|-------------|-------|---------|-------|
|             | 214   | 0       | 0. No |

```
      11      1  1. Yes
3938      .a  .a. No/Don't know health
           insurance
      2      .m  .m. Missing
      3      .s  .s. Skipped by participant
```

-----  
bl\_804b 804: Health insurance: Health insurance through employer  
-----

```
      type: numeric (byte)
      label: bl_804b

      range: [0,1]          units: 1
unique values: 2          missing .: 0/4168
unique mv codes: 3       missing .*: 3943/4168
```

```
tabulation: Freq.  Numeric  Label
           107      0      0. No
           118      1      1. Yes
           3938     .a     .a. No/Don't know health
           insurance
              2      .m     .m. Missing
              3      .s     .s. Skipped by participant
```

-----  
bl\_804c 804: Health insurance: Social security  
-----

```
      type: numeric (byte)
      label: bl_804c

      range: [0,1]          units: 1
unique values: 2          missing .: 0/4168
unique mv codes: 3       missing .*: 3943/4168
```

```
tabulation: Freq.  Numeric  Label
           217      0      0. No
              8      1      1. Yes
           3938     .a     .a. No/Don't know health
           insurance
              2      .m     .m. Missing
              3      .s     .s. Skipped by participant
```

-----  
bl\_804d 804: Health insurance: Other privately purchased commercial health insurance  
-----

```
      type: numeric (byte)
      label: bl_804d

      range: [0,1]          units: 1
unique values: 2          missing .: 0/4168
unique mv codes: 3       missing .*: 3943/4168
```

```
tabulation: Freq.  Numeric  Label
           197      0      0. No
              28      1      1. Yes
           3938     .a     .a. No/Don't know health
           insurance
              2      .m     .m. Missing
              3      .s     .s. Skipped by participant
```

-----  
bl\_804e 804: Health insurance: Low cost pre-payment scheme  
-----

```
      type: numeric (byte)
      label: bl_804e
```

range: [0,1] units: 1  
unique values: 2 missing .: 0/4168  
unique mv codes: 3 missing .\*: 3943/4168

| tabulation: | Freq. | Numeric | Label                              |
|-------------|-------|---------|------------------------------------|
|             | 182   | 0       | 0. No                              |
|             | 43    | 1       | 1. Yes                             |
|             | 3938  | .a      | .a. No/Don't know health insurance |
|             | 2     | .m      | .m. Missing                        |
|             | 3     | .s      | .s. Skipped by participant         |

-----  
bl\_804f 804: Health insurance: High cost pre-payment scheme  
-----

type: numeric (byte)  
label: bl\_804f

range: [0,1] units: 1  
unique values: 2 missing .: 0/4168  
unique mv codes: 3 missing .\*: 3943/4168

| tabulation: | Freq. | Numeric | Label                              |
|-------------|-------|---------|------------------------------------|
|             | 206   | 0       | 0. No                              |
|             | 19    | 1       | 1. Yes                             |
|             | 3938  | .a      | .a. No/Don't know health insurance |
|             | 2     | .m      | .m. Missing                        |
|             | 3     | .s      | .s. Skipped by participant         |

-----  
bl\_804g 804: Health insurance: Other (specify)  
-----

type: string (str41)

unique values: 7 missing "": 0/4168

| tabulation: | Freq. | Value                                       |
|-------------|-------|---------------------------------------------|
|             | 4162  | ."                                          |
|             | 1     | "African Life insurance and zisc insurance" |
|             | 1     | "African life health insurance"             |
|             | 1     | "Airtel life insurance"                     |
|             | 1     | "Chesher Homes"                             |
|             | 1     | "Partners health scheme"                    |
|             | 1     | "We would just buy books"                   |

warning: variable has embedded blanks

-----  
bl\_900 900: Age at first sexual intercourse  
-----

type: numeric (byte)  
label: bl\_900, but 35 nonmissing values are not labeled

range: [0,88] units: 1  
unique values: 37 missing .: 0/4168  
unique mv codes: 2 missing .\*: 37/4168

examples: 16  
18  
19  
23

-----  
bl\_901 901: Relationship to FIRST person with whom had sexual intercourse  
-----

```

type: numeric (byte)
label: bl_901

range: [1,6] units: 1
unique values: 6 missing .: 0/4168
unique mv codes: 3 missing .*: 196/4168

```

```

tabulation: Freq. Numeric Label
1130 1 1. Husband/wife
709 2 2. Live-in partner
1790 3 3. Girlfriend/boyfriend not
living with you
86 4 4. Person you paid or who paid
you for sex
197 5 5. Casual acquaintance
60 6 6. Other
158 .a .a. Never had sex
6 .m .m. Missing
32 .s .s. Skipped by participant

```

-----  
bl\_902 902: Last time had sexual intercourse  
-----

```

type: numeric (byte)
label: bl_902

range: [1,4] units: 1
unique values: 4 missing .: 0/4168
unique mv codes: 3 missing .*: 181/4168

```

```

tabulation: Freq. Numeric Label
1301 1 1. Today/Days ago
1147 2 2. More than a week ago
1127 3 3. More than a month ago
412 4 4. More than a year ago
158 .a .a. Never had sex
6 .m .m. Missing
17 .s .s. Skipped by participant

```

-----  
bl\_903 903: Times had sex in last week  
-----

```

type: numeric (byte)
label: bl_903, but 19 nonmissing values are not labeled

range: [1,88] units: 1
unique values: 20 missing .: 0/4168
unique mv codes: 4 missing .*: 2883/4168

```

```

tabulation: Freq. Numeric Label
331 1
319 2
222 3
72 4
29 5
20 6
36 7
13 8
7 9
2 10
10 11
10 12
1 13
2 14
1 15
1 16
1 17

```

```

      1      18
      1      19
    206     88 88. Don't Know
    158     .a .a. Never had sex
   2686     .b .b. Sex >1 week ago
      6     .m .m. Missing
     33     .s .s. Skipped by participant

```

-----  
bl\_904

904: Times used condom when had sex in last week  
-----

```

      type: numeric (byte)
      label: bl_904, but 16 nonmissing values are not labeled

      range: [1,88]                units: 1
  unique values: 17                missing .: 0/4168
  unique mv codes: 4                missing .*: 2979/4168

```

```

  tabulation: Freq.  Numeric  Label
              382      1
              242      2
              101      3
               29      4
               10      5
               11      6
               16      7
                7      8
                7      9
                1     10
                2     11
                6     12
                2     13
                1     14
                1     15
                1     16
            370     88 88. Don't Know
            158     .a .a. Never had sex
           2686     .b .b. Sex >1 week ago
                6     .m .m. Missing
            129     .s .s. Skipped by participant

```

bl\_904:

1. There was no "0" option on this question.

-----  
bl\_905

905: Relationship to LAST person with whom had sexual intercourse  
-----

```

      type: numeric (byte)
      label: bl_905

      range: [1,6]                units: 1
  unique values: 6                missing .: 0/4168
  unique mv codes: 4                missing .*: 600/4168

```

```

  tabulation: Freq.  Numeric  Label
              1542     1  1. Husband/wife
               513     2  2. Live-in partner
            1280     3  3. Girlfriend/boyfriend not
                  living with you
                89     4  4. Person you paid or who paid
                  you for sex
            101     5  5. Casual acquaintance
                43     6  6. Other
            158     .a .a. Never had sex
            412     .b .b. Sex >1 year ago
                6     .m .m. Missing
                24     .s .s. Skipped by participant

```

-----  
bl\_906

906: Condom used last time had sex  
-----

type: numeric (byte)  
label: bl\_906  
  
range: [0,88] units: 1  
unique values: 3 missing .: 0/4168  
unique mv codes: 4 missing .\*: 579/4168

| tabulation: | Freq. | Numeric | Label                      |
|-------------|-------|---------|----------------------------|
|             | 2012  | 0       | 0. No                      |
|             | 1458  | 1       | 1. Yes                     |
|             | 119   | 88      | 88. Don't Know             |
|             | 158   | .a      | .a. Never had sex          |
|             | 412   | .b      | .b. Sex >1 year ago        |
|             | 6     | .m      | .m. Missing                |
|             | 3     | .s      | .s. Skipped by participant |

-----  
bl\_907

907: Use condom every time had sex with LAST person in last 12 months  
-----

type: numeric (byte)  
label: bl\_907  
  
range: [0,88] units: 1  
unique values: 3 missing .: 0/4168  
unique mv codes: 4 missing .\*: 580/4168

| tabulation: | Freq. | Numeric | Label                      |
|-------------|-------|---------|----------------------------|
|             | 2225  | 0       | 0. No                      |
|             | 1141  | 1       | 1. Yes                     |
|             | 222   | 88      | 88. Don't Know             |
|             | 158   | .a      | .a. Never had sex          |
|             | 412   | .b      | .b. Sex >1 year ago        |
|             | 6     | .m      | .m. Missing                |
|             | 4     | .s      | .s. Skipped by participant |

-----  
bl\_908

908: Having sex with other people during time having sex with LAST person  
-----

type: numeric (byte)  
label: bl\_908  
  
range: [0,88] units: 1  
unique values: 3 missing .: 0/4168  
unique mv codes: 4 missing .\*: 581/4168

| tabulation: | Freq. | Numeric | Label                      |
|-------------|-------|---------|----------------------------|
|             | 2514  | 0       | 0. No                      |
|             | 896   | 1       | 1. Yes                     |
|             | 177   | 88      | 88. Don't Know             |
|             | 158   | .a      | .a. Never had sex          |
|             | 412   | .b      | .b. Sex >1 year ago        |
|             | 6     | .m      | .m. Missing                |
|             | 5     | .s      | .s. Skipped by participant |

-----  
bl\_909

909: Total number of people had sex with in last 12 months  
-----

type: numeric (byte)  
label: bl\_909, but 31 nonmissing values are not labeled  
  
range: [1,88] units: 1  
unique values: 32 missing .: 0/4168  
unique mv codes: 4 missing .\*: 630/4168

examples: 1  
2  
3  
88 88. Don't Know

-----  
bl\_910 910: Total number of people had sex with in lifetime  
-----

type: numeric (byte)  
label: bl\_910, but 34 nonmissing values are not labeled

range: [1,88] units: 1  
unique values: 35 missing .: 0/4168  
unique mv codes: 3 missing .\*: 231/4168

examples: 2  
3  
6  
88 88. Don't Know

-----  
bl\_1000 1000: Told by medical professional had sexually transmitted infection in last 12  
-----

type: numeric (byte)  
label: yesno\_bl

range: [0,1] units: 1  
unique values: 2 missing .: 0/4168  
unique mv codes: 2 missing .\*: 11/4168

tabulation: Freq. Numeric Label  
3508 0 0. No  
649 1 1. Yes  
7 .m .m. Missing  
4 .s .s. Skipped by participant

-----  
bl\_1001 1001: White or foul smelling discharged from genitals in last 12 months  
-----

type: numeric (byte)  
label: yesno\_bl

range: [0,1] units: 1  
unique values: 2 missing .: 0/4168  
unique mv codes: 2 missing .\*: 9/4168

tabulation: Freq. Numeric Label  
3286 0 0. No  
873 1 1. Yes  
7 .m .m. Missing  
2 .s .s. Skipped by participant

-----  
bl\_1002 1002: Burning or pain during urination in last 12 months  
-----

type: numeric (byte)  
label: yesno\_bl

range: [0,1] units: 1  
unique values: 2 missing .: 0/4168  
unique mv codes: 2 missing .\*: 9/4168

tabulation: Freq. Numeric Label  
3207 0 0. No  
952 1 1. Yes

7 .m .m. Missing  
2 .s .s. Skipped by participant

-----  
bl\_1003 1003: Sores or ulcers on genitals in last 12 months  
-----

type: numeric (byte)  
label: yesno\_bl  
  
range: [0,1] units: 1  
unique values: 2 missing .: 0/4168  
unique mv codes: 2 missing .\*: 10/4168

| tabulation: | Freq. | Numeric | Label                      |
|-------------|-------|---------|----------------------------|
|             | 3445  | 0       | 0. No                      |
|             | 713   | 1       | 1. Yes                     |
|             | 7     | .m      | .m. Missing                |
|             | 3     | .s      | .s. Skipped by participant |

-----  
bl\_1004 1004: Itching in genital area in last 12 months  
-----

type: numeric (byte)  
label: yesno\_bl  
  
range: [0,1] units: 1  
unique values: 2 missing .: 0/4168  
unique mv codes: 2 missing .\*: 9/4168

| tabulation: | Freq. | Numeric | Label                      |
|-------------|-------|---------|----------------------------|
|             | 3163  | 0       | 0. No                      |
|             | 996   | 1       | 1. Yes                     |
|             | 7     | .m      | .m. Missing                |
|             | 2     | .s      | .s. Skipped by participant |

-----  
bl\_1005 1005: Swelling or tenderness in genital area in last 12 months  
-----

type: numeric (byte)  
label: yesno\_bl  
  
range: [0,1] units: 1  
unique values: 2 missing .: 0/4168  
unique mv codes: 2 missing .\*: 11/4168

| tabulation: | Freq. | Numeric | Label                      |
|-------------|-------|---------|----------------------------|
|             | 3674  | 0       | 0. No                      |
|             | 483   | 1       | 1. Yes                     |
|             | 7     | .m      | .m. Missing                |
|             | 4     | .s      | .s. Skipped by participant |

-----  
bl\_currpart\_an Analysis: Currently has spouse/primary sex partner  
-----

type: numeric (byte)  
label: yesno\_bl  
  
range: [0,1] units: 1  
unique values: 2 missing .: 0/4168  
unique mv codes: 1 missing .\*: 4/4168

| tabulation: | Freq. | Numeric | Label                      |
|-------------|-------|---------|----------------------------|
|             | 705   | 0       | 0. No                      |
|             | 3459  | 1       | 1. Yes                     |
|             | 4     | .s      | .s. Skipped by participant |



bl\_currpart\_an:

1. Created for analysis: from 201, 205, 211; gen bl\_currpart\_an = bl\_201/ replace  
bl\_currpart\_an = 1 if bl\_205== 1|bl\_205== 2/ replace bl\_currpart\_an = 0 if bl\_211 == 0/  
replace bl\_currpart\_an = 1 if bl\_211 == 1 replace bl\_currpart\_an = .s if bl\_211 == .s &  
bl\_205 == 0 replace bl\_currpart\_an = 1 if bl\_212\_m >0 & bl\_212\_m < . & bl\_currpart\_an >.

-----  
w6\_time Time Point  
-----

type: numeric (byte)  
label: time

range: [1,2] units: 1  
unique values: 2 missing .: 51/4168  
unique mv codes: 2 missing .\*: 699/4168

tabulation: Freq. Numeric Label  
3413 1 1. 6 Weeks  
5 2 2. 6 Months  
51 .  
699 .x

-----  
w6\_ID 6 Week Survey: Survey ID  
-----

type: numeric (int)  
label: admin\_w6, but 3169 nonmissing values are not labeled

range: [272,14919] units: 1  
unique values: 3169 missing .: 51/4168  
unique mv codes: 2 missing .\*: 699/4168

examples: 6414  
9336  
11437  
13900

-----  
w6\_Date 6 Week Survey: Interviewer entered date, System timestamp  
-----

type: numeric (double)  
label: admin\_w6, but 3418 nonmissing values are not labeled

range: [1.705e+12,1.744e+12] units: 1000  
unique values: 3418 missing .: 51/4168  
unique mv codes: 2 missing .\*: 699/4168

examples: 1.716e+12  
1.721e+12  
1.725e+12  
1.734e+12

-----  
w6\_SurveyStatus 6 Week Survey: Survey Status  
-----

type: numeric (byte)  
label: SurveyStatus\_w6

range: [0,5] units: 1  
unique values: 6 missing .: 0/4168  
unique mv codes: 1 missing .\*: 726/4168

tabulation: Freq. Numeric Label  
10 0 0. Interrupted  
3390 1 1. Completed  
13 2 2. Completed on resumption

|     |    |                                         |
|-----|----|-----------------------------------------|
| 5   | 3  | 3. Completed 6 mon survey at 6 wk visit |
| 20  | 4  | 4. Withdrew from study                  |
| 4   | 5  | 5. Deceased                             |
| 726 | .x | .x. No 6 week survey                    |

-----  
w6\_AdminAge 6 Week Survey: Age entered by interviewer  
-----

```

type: numeric (byte)
label: admin_w6, but 31 nonmissing values are not labeled

range: [18,48]          units: 1
unique values: 31      missing .: 51/4168
unique mv codes: 2     missing .*: 699/4168

examples: 21
          25
          30
          43

```

w6\_AdminAge:  
1. Do not use this variable for analysis. Entered for administrative purposes. Should use bl\_102a.

-----  
w6\_SurveyGender 6 Week Survey: Administrative variable  
-----

```

type: string (str6)

unique values: 2          missing "": 750/4168

tabulation: Freq. Value
            750  ""
            1785 "Female"
            1633 "Male"

```

w6\_SurveyGender:  
1. Survey gender does NOT always match true participant gender.

-----  
w6\_InterviewerID 6 Week Survey: Interviewer ID  
-----

```

type: numeric (int)
label: admin_w6, but 28 nonmissing values are not labeled

range: [100,323]       units: 1
unique values: 28     missing .: 51/4168
unique mv codes: 2     missing .*: 699/4168

tabulation: Freq. Numeric Label
            119    100
            176    101
            116    102
            212    103
            113    104
            106    105
            132    106
             26    107
             70    108
            182    109
             72    111
             90    112
             72    113
            176    114
            251    115
            179    116

```

```

259      117
200      118
173      119
149      120
1         147
1         156
1         158
154      210
59       211
246      222
82       223
1        323
51       .
699     .x .x. No 6 week survey

```

```
-----
w6_GUID_sys                                     6 Week Survey: Unique survey identifier
-----
```

```

type: string (str36)

unique values: 3418                               missing "": 750/4168

examples: "05ee75bd-0deb-4717-83fc-dfab11bb9766"
          "447ce40c-5fa0-45a8-8f0f-fbdf0717b553"
          "80cb364e-e947-47c2-b7c9-41ef85fff4b4"
          "c28c59b6-3d80-4e90-a400-247248be0e05"

```

```
-----
w6_SiteID                                       6 Week Survey: Survey Site ID
-----
```

```

type: numeric (byte)
label: w6_SiteID

range: [1,95]                                     units: 1
unique values: 12                               missing .: 51/4168
unique mv codes: 2                             missing .*: 699/4168

```

```

tabulation: Freq.  Numeric  Label
            423      1      1. SFH HCT - Cairo Road
            378      2      2. Chawama Clinic - MCH
            198      3      3. Chawama Clinic - Out Patient
                               Ward (VMMC)
            264      5      5. Kamwala Clinic - TB, STI &
                               HIV Clinic
            497      6      6. Kapata Urban Clinic, MCH
            659      7      7. Kapata Urban Clinic, TB, STI
                               & HIV
            167      8      8. Chipata Gen Hosp - OP VMMC
            614     11      11. SFH New Start
            109     13      13. SFH VMMC
             7      93     93. YWCA FP Site
             46     94     94. YWCA HTC Site
             56     95     95. YWCA VMMC
             51     .
            699     .x     .x. No 6 week survey

```

```

w6_SiteID:
1. 93, 94, & 95 are external evaluation sites

```

```
-----
w6_SiteName                                     6 Week Survey: Survey Site String
-----
```

```

type: string (str40)

unique values: 14                               missing "": 750/4168

tabulation: Freq.  Value

```

```

750 ""
378 "Chawama Clinic - Maternity Ward"
198 "Chawama Clinic - Out Patient Ward
(VMMC)"
167 "Chipata Gen Hosp - OP VMMC"
186 "Kamwala Clinic - TB, STI & HIV Clinic"
78 "Kamwala Clinic - TB, STI and HIV
Clinic"
497 "Kapata Urban Clinic, MCH"
415 "Kapata Urban Clinic, TB, STI & HIV"
244 "Kapata Urban Clinic, TB, STI and HIV"
423 "SFH HCT - Cairo Road"
614 "SFH New Start"
109 "SFH VMMC"
7 "YWCA FP Site"
46 "YWCA HTC Site"
56 "YWCA VMMC"

```

warning: variable has embedded blanks

w6\_SiteName:

1. YWCA sites are external evaluation sites

-----  
w6\_SurveyType 6 Week Survey: Survey Type  
-----

```

type: numeric (byte)
label: admin_w6, but 2 nonmissing values are not labeled

range: [3,4] units: 1
unique values: 2 missing .: 51/4168
unique mv codes: 2 missing .*: 699/4168

```

| tabulation: | Freq. | Numeric | Label                |
|-------------|-------|---------|----------------------|
|             | 3413  | 3       |                      |
|             | 5     | 4       |                      |
|             | 51    | .       |                      |
|             | 699   | .x      | .x. No 6 week survey |

-----  
w6\_SurveyTypeName 6 Week Survey: Survey Type String  
-----

```

type: string (str21)

unique values: 2 missing "": 750/4168

```

| tabulation: | Freq. | Value                   |
|-------------|-------|-------------------------|
|             | 750   | ""                      |
|             | 5     | "Reach 6 MONTHS - Both" |
|             | 3413  | "Reach 6 WEEKS - Both"  |

warning: variable has embedded blanks

-----  
w6\_SurveyDuration\_sys Minutes for survey completion  
-----

```

type: numeric (int)
label: admin_w6, but 62 nonmissing values are not labeled

range: [-708,1459] units: 1
unique values: 62 missing .: 51/4168
unique mv codes: 2 missing .*: 699/4168

```

```

examples: 7
          10
          14
          26

```

w6\_SurveyDuration\_sys:

- 1. Large values may be due to completing survey on resumption (see SurveyStatus).

-----  
w6\_Weekday\_sys 6 Week Survey: Day of week  
-----

```

type: string (str3)
unique values: 7                               missing "": 750/4168

tabulation: Freq. Value
              750 ""
              746 "Fri"
              635 "Mon"
              131 "Sat"
               38 "Sun"
              737 "Thu"
              571 "Tue"
              560 "Wed"

```

w6\_Weekday\_sys:

- 1. Generated automatically based on w6\_Date

-----  
w6\_Day\_sys 6 Week Survey: Day of month  
-----

```

type: numeric (byte)
label: admin_w6, but 31 nonmissing values are not labeled

range: [1,31]                                units: 1
unique values: 31                            missing .: 51/4168
unique mv codes: 2                           missing .*: 699/4168

examples: 8
           16
           24
           31

```

w6\_Day\_sys:

- 1. Generated automatically based on w6\_Date

-----  
w6\_Month\_sys 6 Week Survey: Day of month  
-----

```

type: numeric (byte)
label: admin_w6, but 12 nonmissing values are not labeled

range: [1,12]                                units: 1
unique values: 12                            missing .: 51/4168
unique mv codes: 2                           missing .*: 699/4168

tabulation: Freq. Numeric Label
              12         1
              64         2
             198         3
             337         4
             525         5
             445         6
             548         7
             389         8
             320         9
             260        10
             196        11
             124        12
              51         .
             699         .x .x. No 6 week survey

```

w6\_Month\_sys:

1. Generated automatically based on w6\_Date

-----  
w6\_DBVersion

DBVersion  
-----

type: numeric (double)  
label: admin\_w6, but 8 nonmissing values are not labeled

range: [1.5,2.6]                      units: .1  
unique values: 8                      missing .: 51/4168  
unique mv codes: 2                    missing .\*: 699/4168

| tabulation: | Freq. | Numeric | Label                |
|-------------|-------|---------|----------------------|
|             | 1     | 1.5     |                      |
|             | 1     | 1.8     |                      |
|             | 62    | 1.9     |                      |
|             | 22    | 2       |                      |
|             | 582   | 2.1     |                      |
|             | 727   | 2.2     |                      |
|             | 1240  | 2.5     |                      |
|             | 783   | 2.6     |                      |
|             | 51    | .       |                      |
|             | 699   | .x      | .x. No 6 week survey |

-----  
w6\_AppVersion

AppVersion  
-----

type: numeric (double)  
label: admin\_w6, but 8 nonmissing values are not labeled

range: [1.4,2.6]                      units: .1  
unique values: 8                      missing .: 51/4168  
unique mv codes: 2                    missing .\*: 699/4168

| tabulation: | Freq. | Numeric | Label                |
|-------------|-------|---------|----------------------|
|             | 1     | 1.4     |                      |
|             | 1     | 1.8     |                      |
|             | 62    | 1.9     |                      |
|             | 22    | 2       |                      |
|             | 582   | 2.1     |                      |
|             | 727   | 2.2     |                      |
|             | 1240  | 2.5     |                      |
|             | 783   | 2.6     |                      |
|             | 51    | .       |                      |
|             | 699   | .x      | .x. No 6 week survey |

-----  
w6\_100

100: Gender  
-----

type: numeric (byte)  
label: w6\_100

range: [0,1]                            units: 1  
unique values: 2                      missing .: 51/4168  
unique mv codes: 2                    missing .\*: 699/4168

| tabulation: | Freq. | Numeric | Label                |
|-------------|-------|---------|----------------------|
|             | 1633  | 0       | 0. Male              |
|             | 1785  | 1       | 1. Female            |
|             | 51    | .       |                      |
|             | 699   | .x      | .x. No 6 week survey |

-----  
w6\_101

101: Married or living with someone  
-----

```

type: numeric (byte)
label: w6_101

range: [0,2]                units: 1
unique values: 3            missing .: 51/4168
unique mv codes: 4         missing .*: 703/4168

```

```

tabulation: Freq.  Numeric  Label
            1697      0      0. No
            1656      1      1. Yes, married
             61      2      2. Yes, living with partner
             51      .
              2      .m     .m. Missing
              2      .s     .s. Skipped by participant
            699      .x     .x. No 6 week survey

```

---

w6\_102 102: Primary sex partner

---

```

type: numeric (byte)
label: w6_102

range: [0,1]                units: 1
unique values: 2            missing .: 51/4168
unique mv codes: 5         missing .*: 2420/4168

```

```

tabulation: Freq.  Numeric  Label
            563      0      0. No
            1134     1      1. Yes
             51      .
            1717     .a     .a. Married/Living with someone
              3      .m     .m. Missing
              1      .s     .s. Skipped by participant
            699      .x     .x. No 6 week survey

```

---

w6\_103 103: Children 15 and older

---

```

type: numeric (byte)
label: w6_yesno

range: [0,1]                units: 1
unique values: 2            missing .: 51/4168
unique mv codes: 4         missing .*: 705/4168

```

```

tabulation: Freq.  Numeric  Label
            2983     0      0. No
            429      1      1. Yes
             51      .
              5      .m     .m. Missing
              1      .s     .s. Skipped by participant
            699      .x     .x. No 6 week survey

```

---

w6\_104 104: Respondent understands to only include services from last 6 weeks

---

```

type: numeric (byte)
label: w6_yesno

range: [1,1]                units: 1
unique values: 1            missing .: 51/4168
unique mv codes: 4         missing .*: 707/4168

```

```

tabulation: Freq.  Numeric  Label
            3410     1      1. Yes
             51      .

```

3 .m .m. Missing  
5 .w .w. Answered 6 mon survey at 6  
wk visit  
699 .x .x. No 6 week survey

-----  
w6\_105a 105: Respondent: HIV testing/counseling in last 6 weeks  
-----

type: numeric (byte)  
label: w6\_yesno  
  
range: [0,1] units: 1  
unique values: 2 missing .: 51/4168  
unique mv codes: 4 missing .\*: 709/4168

| tabulation: | Freq. | Numeric | Label                                      |
|-------------|-------|---------|--------------------------------------------|
|             | 2847  | 0       | 0. No                                      |
|             | 561   | 1       | 1. Yes                                     |
|             | 51    | .       | .                                          |
|             | 5     | .m      | .m. Missing                                |
|             | 5     | .w      | .w. Answered 6 mon survey at 6<br>wk visit |
|             | 699   | .x      | .x. No 6 week survey                       |

-----  
w6\_105b 105: Respondent: HIV care and treatment in last 6 weeks  
-----

type: numeric (byte)  
label: w6\_yesno  
  
range: [0,1] units: 1  
unique values: 2 missing .: 51/4168  
unique mv codes: 5 missing .\*: 717/4168

| tabulation: | Freq. | Numeric | Label                                      |
|-------------|-------|---------|--------------------------------------------|
|             | 3083  | 0       | 0. No                                      |
|             | 317   | 1       | 1. Yes                                     |
|             | 51    | .       | .                                          |
|             | 5     | .m      | .m. Missing                                |
|             | 8     | .s      | .s. Skipped by participant                 |
|             | 5     | .w      | .w. Answered 6 mon survey at 6<br>wk visit |
|             | 699   | .x      | .x. No 6 week survey                       |

-----  
w6\_105c 105: Respondent: STD care and treatment in last 6 weeks  
-----

type: numeric (byte)  
label: w6\_yesno  
  
range: [0,1] units: 1  
unique values: 2 missing .: 51/4168  
unique mv codes: 5 missing .\*: 713/4168

| tabulation: | Freq. | Numeric | Label                                      |
|-------------|-------|---------|--------------------------------------------|
|             | 3263  | 0       | 0. No                                      |
|             | 141   | 1       | 1. Yes                                     |
|             | 51    | .       | .                                          |
|             | 5     | .m      | .m. Missing                                |
|             | 4     | .s      | .s. Skipped by participant                 |
|             | 5     | .w      | .w. Answered 6 mon survey at 6<br>wk visit |
|             | 699   | .x      | .x. No 6 week survey                       |

-----  
w6\_105d\_f 105: Respondent: Family planning in last 6 weeks  
-----



```

type: numeric (byte)
label: w6_yesno

range: [0,1]
unique values: 2
unique mv codes: 6

units: 1
missing .: 51/4168
missing .*: 2337/4168

```

```

tabulation: Freq.   Numeric   Label
             1565      0      0. No
             215      1      1. Yes
             51       .
             1630     .g     .g. Gender skip pattern
             2        .m     .m. Missing
             1        .s     .s. Skipped by participant
             5        .w     .w. Answered 6 mon survey at 6
                    wk visit
             699     .x     .x. No 6 week survey

```

-----  
w6\_105e\_f 105: Respondent: Cervical cancer screening  
-----

```

type: numeric (byte)
label: w6_yesno

range: [0,1]
unique values: 2
unique mv codes: 5

units: 1
missing .: 51/4168
missing .*: 2336/4168

```

```

tabulation: Freq.   Numeric   Label
             1494      0      0. No
             287      1      1. Yes
             51       .
             1630     .g     .g. Gender skip pattern
             2        .m     .m. Missing
             5        .w     .w. Answered 6 mon survey at 6
                    wk visit
             699     .x     .x. No 6 week survey

```

-----  
w6\_105f\_m 105: Respondent: Male circumcision in last 6 weeks  
-----

```

type: numeric (byte)
label: w6_yesno

range: [0,1]
unique values: 2
unique mv codes: 6

units: 1
missing .: 51/4168
missing .*: 2495/4168

```

```

tabulation: Freq.   Numeric   Label
             1325      0      0. No
             297      1      1. Yes
             51       .
             1783     .g     .g. Gender skip pattern
             6        .m     .m. Missing
             2        .s     .s. Skipped by participant
             5        .w     .w. Answered 6 mon survey at 6
                    wk visit
             699     .x     .x. No 6 week survey

```

-----  
w6\_106a 106: Partner: HIV testing/counseling in last 6 weeks  
-----

```

type: numeric (byte)
label: w6_106

range: [0,88]

units: 1

```

unique values: 3 missing .: 51/4168  
unique mv codes: 6 missing .\*: 1275/4168

| tabulation: | Freq. | Numeric | Label                                      |
|-------------|-------|---------|--------------------------------------------|
|             | 2066  | 0       | 0. No                                      |
|             | 602   | 1       | 1. Yes                                     |
|             | 174   | 88      | 88. Don't Know                             |
|             | 51    | .       | .                                          |
|             | 562   | .a      | .a. Married/Living with someone            |
|             | 7     | .m      | .m. Missing                                |
|             | 2     | .s      | .s. Skipped by participant                 |
|             | 5     | .w      | .w. Answered 6 mon survey at 6<br>wk visit |
|             | 699   | .x      | .x. No 6 week survey                       |

-----  
w6\_106b 106: Partner: HIV care and treatment in last 6 weeks  
-----

type: numeric (byte)  
label: w6\_106

range: [0,88] units: 1  
unique values: 3 missing .: 51/4168  
unique mv codes: 6 missing .\*: 1275/4168

| tabulation: | Freq. | Numeric | Label                                      |
|-------------|-------|---------|--------------------------------------------|
|             | 2469  | 0       | 0. No                                      |
|             | 216   | 1       | 1. Yes                                     |
|             | 157   | 88      | 88. Don't Know                             |
|             | 51    | .       | .                                          |
|             | 562   | .a      | .a. Married/Living with someone            |
|             | 7     | .m      | .m. Missing                                |
|             | 2     | .s      | .s. Skipped by participant                 |
|             | 5     | .w      | .w. Answered 6 mon survey at 6<br>wk visit |
|             | 699   | .x      | .x. No 6 week survey                       |

-----  
w6\_106c 106: Partner: STD care and treatment in last 6 weeks  
-----

type: numeric (byte)  
label: w6\_106

range: [0,88] units: 1  
unique values: 3 missing .: 51/4168  
unique mv codes: 6 missing .\*: 1275/4168

| tabulation: | Freq. | Numeric | Label                                      |
|-------------|-------|---------|--------------------------------------------|
|             | 2564  | 0       | 0. No                                      |
|             | 131   | 1       | 1. Yes                                     |
|             | 147   | 88      | 88. Don't Know                             |
|             | 51    | .       | .                                          |
|             | 562   | .a      | .a. Married/Living with someone            |
|             | 7     | .m      | .m. Missing                                |
|             | 2     | .s      | .s. Skipped by participant                 |
|             | 5     | .w      | .w. Answered 6 mon survey at 6<br>wk visit |
|             | 699   | .x      | .x. No 6 week survey                       |

-----  
w6\_106d\_m 106: Partner: Family planning in last 6 weeks  
-----

type: numeric (byte)  
label: w6\_106

range: [0,88] units: 1  
unique values: 3 missing .: 51/4168

unique mv codes: 6 missing .\*: 2884/4168

| tabulation: | Freq. | Numeric | Label                                      |
|-------------|-------|---------|--------------------------------------------|
|             | 943   | 0       | 0. No                                      |
|             | 199   | 1       | 1. Yes                                     |
|             | 91    | 88      | 88. Don't Know                             |
|             | 51    | .       | .                                          |
|             | 390   | .a      | .a. Married/Living with someone            |
|             | 1783  | .g      | .g. Gender skip pattern                    |
|             | 7     | .m      | .m. Missing                                |
|             | 5     | .w      | .w. Answered 6 mon survey at 6<br>wk visit |
|             | 699   | .x      | .x. No 6 week survey                       |

-----  
w6\_106e\_m

106: Partner: Cervical cancer screening  
-----

type: numeric (byte)  
label: w6\_106

range: [0,88] units: 1  
unique values: 3 missing .: 51/4168  
unique mv codes: 6 missing .\*: 2884/4168

| tabulation: | Freq. | Numeric | Label                                      |
|-------------|-------|---------|--------------------------------------------|
|             | 1030  | 0       | 0. No                                      |
|             | 96    | 1       | 1. Yes                                     |
|             | 107   | 88      | 88. Don't Know                             |
|             | 51    | .       | .                                          |
|             | 390   | .a      | .a. Married/Living with someone            |
|             | 1783  | .g      | .g. Gender skip pattern                    |
|             | 7     | .m      | .m. Missing                                |
|             | 5     | .w      | .w. Answered 6 mon survey at 6<br>wk visit |
|             | 699   | .x      | .x. No 6 week survey                       |

-----  
w6\_106f\_f

106: Partner: Male circumcision in last 6 weeks  
-----

type: numeric (byte)  
label: w6\_106

range: [0,88] units: 1  
unique values: 3 missing .: 51/4168  
unique mv codes: 7 missing .\*: 2509/4168

| tabulation: | Freq. | Numeric | Label                                      |
|-------------|-------|---------|--------------------------------------------|
|             | 1508  | 0       | 0. No                                      |
|             | 71    | 1       | 1. Yes                                     |
|             | 29    | 88      | 88. Don't Know                             |
|             | 51    | .       | .                                          |
|             | 172   | .a      | .a. Married/Living with someone            |
|             | 1630  | .g      | .g. Gender skip pattern                    |
|             | 2     | .m      | .m. Missing                                |
|             | 1     | .s      | .s. Skipped by participant                 |
|             | 5     | .w      | .w. Answered 6 mon survey at 6<br>wk visit |
|             | 699   | .x      | .x. No 6 week survey                       |

-----  
w6\_107a

107: Children: HIV testing/counseling in last 6 weeks  
-----

type: numeric (byte)  
label: w6\_107

range: [0,88] units: 1  
unique values: 3 missing .: 51/4168

unique mv codes: 6 missing .\*: 3688/4168

| tabulation: | Freq. | Numeric | Label                                      |
|-------------|-------|---------|--------------------------------------------|
|             | 345   | 0       | 0. No                                      |
|             | 56    | 1       | 1. Yes                                     |
|             | 28    | 88      | 88. Don't Know                             |
|             | 51    | .       | .                                          |
|             | 2979  | .a      | .a. No children aged 15 or older           |
|             | 3     | .m      | .m. Missing                                |
|             | 2     | .s      | .s. Skipped by participant                 |
|             | 5     | .w      | .w. Answered 6 mon survey at 6<br>wk visit |
|             | 699   | .x      | .x. No 6 week survey                       |

-----  
w6\_107b 107: Children: HIV care and treatment in last 6 weeks  
-----

type: numeric (byte)  
label: w6\_107

range: [0,88] units: 1  
unique values: 3 missing .: 51/4168  
unique mv codes: 6 missing .\*: 3688/4168

| tabulation: | Freq. | Numeric | Label                                      |
|-------------|-------|---------|--------------------------------------------|
|             | 368   | 0       | 0. No                                      |
|             | 34    | 1       | 1. Yes                                     |
|             | 27    | 88      | 88. Don't Know                             |
|             | 51    | .       | .                                          |
|             | 2979  | .a      | .a. No children aged 15 or older           |
|             | 3     | .m      | .m. Missing                                |
|             | 2     | .s      | .s. Skipped by participant                 |
|             | 5     | .w      | .w. Answered 6 mon survey at 6<br>wk visit |
|             | 699   | .x      | .x. No 6 week survey                       |

-----  
w6\_107c 107: Children: STD care and treatment in last 6 weeks  
-----

type: numeric (byte)  
label: w6\_107

range: [0,88] units: 1  
unique values: 3 missing .: 51/4168  
unique mv codes: 6 missing .\*: 3688/4168

| tabulation: | Freq. | Numeric | Label                                      |
|-------------|-------|---------|--------------------------------------------|
|             | 386   | 0       | 0. No                                      |
|             | 14    | 1       | 1. Yes                                     |
|             | 29    | 88      | 88. Don't Know                             |
|             | 51    | .       | .                                          |
|             | 2979  | .a      | .a. No children aged 15 or older           |
|             | 3     | .m      | .m. Missing                                |
|             | 2     | .s      | .s. Skipped by participant                 |
|             | 5     | .w      | .w. Answered 6 mon survey at 6<br>wk visit |
|             | 699   | .x      | .x. No 6 week survey                       |

-----  
w6\_107d 107: Children: Family planning in last 6 weeks  
-----

type: numeric (byte)  
label: w6\_107

range: [0,88] units: 1  
unique values: 3 missing .: 51/4168  
unique mv codes: 6 missing .\*: 3688/4168

```

tabulation:  Freq.  Numeric  Label
              377      0      0. No
              21      1      1. Yes
              31      88     88. Don't Know
              51      .
            2979     .a     .a. No children aged 15 or older
              3      .m     .m. Missing
              2      .s     .s. Skipped by participant
              5      .w     .w. Answered 6 mon survey at 6
                   wk visit
            699     .x     .x. No 6 week survey

```

-----  
w6\_107e

107: Children: Cervical cancer screening  
-----

```

type: numeric (byte)
label: w6_107

```

```

range: [0,88]          units: 1
unique values: 3      missing .: 51/4168
unique mv codes: 6    missing .*: 3688/4168

```

```

tabulation:  Freq.  Numeric  Label
              387      0      0. No
              17      1      1. Yes
              25      88     88. Don't Know
              51      .
            2979     .a     .a. No children aged 15 or older
              3      .m     .m. Missing
              2      .s     .s. Skipped by participant
              5      .w     .w. Answered 6 mon survey at 6
                   wk visit
            699     .x     .x. No 6 week survey

```

-----  
w6\_107f

107: Children: Male circumcision in last 6 weeks  
-----

```

type: numeric (byte)
label: w6_107

```

```

range: [0,88]          units: 1
unique values: 3      missing .: 51/4168
unique mv codes: 6    missing .*: 3688/4168

```

```

tabulation:  Freq.  Numeric  Label
              397      0      0. No
              17      1      1. Yes
              15      88     88. Don't Know
              51      .
            2979     .a     .a. No children aged 15 or older
              3      .m     .m. Missing
              2      .s     .s. Skipped by participant
              5      .w     .w. Answered 6 mon survey at 6
                   wk visit
            699     .x     .x. No 6 week survey

```

-----  
w6\_200

200: HTC: Respondent understands to only include services from last 6 weeks  
-----

```

type: numeric (byte)
label: yesnoserv

```

```

range: [1,1]          units: 1
unique values: 1      missing .: 51/4168
unique mv codes: 6    missing .*: 3558/4168

```

```

tabulation:  Freq.  Numeric  Label
              559      1      1. Yes
              51      .
              2847     .a     .a. Did not receive service
              5        .m     .m. Missing
              2        .s     .s. Skipped by participant
              5        .w     .w. Answered 6 mon survey at 6
                   wk visit
              699     .x     .x. No 6 week survey

```

w6\_201

201: HTC: numservber times to health facility

```

-----
type:  numeric (byte)
label:  numserv, but 6 nonmissing values are not labeled

range:  [1,6]                units:  1
unique values:  6            missing  .:  51/4168
unique mv codes: 6            missing  .*: 3567/4168

```

```

tabulation:  Freq.  Numeric  Label
              378      1
              90       2
              40       3
              18       4
              7        5
              17       6
              51      .
              2847     .a     .a. Did not receive service
              5        .m     .m. Missing
              11       .s     .s. Skipped by participant
              5        .w     .w. Answered 6 mon survey at 6
                   wk visit
              699     .x     .x. No 6 week survey

```

w6\_202

202: HTC: Health facility name

```

-----
type:  string (str55)

unique values:  217            missing  "":  755/4168

examples:  "."
           ". "
           ". ."
           ". ."

warning:  variable has embedded blanks

```

w6\_203

203: HTC: Alone or accompanied

```

-----
type:  numeric (byte)
label:  hfpeople

range:  [1,3]                units:  1
unique values:  3            missing  .:  51/4168
unique mv codes: 6            missing  .*: 3563/4168

```

```

tabulation:  Freq.  Numeric  Label
              360      1      1. Alone
              147      2      2. Spouse/Partner
              47       3      3. Someone else
              51      .
              2847     .a     .a. Did not receive service
              5        .m     .m. Missing
              7        .s     .s. Skipped by participant

```

5 .w .w. Answered 6 mon survey at 6  
wk visit  
699 .x .x. No 6 week survey

w6\_204

204: HTC: Satisfied with services

type: numeric (byte)  
label: hfsat  
range: [1,3] units: 1  
unique values: 3 missing .: 51/4168  
unique mv codes: 6 missing .\*: 3563/4168

| tabulation: | Freq. | Numeric | Label                                      |
|-------------|-------|---------|--------------------------------------------|
|             | 24    | 1       | 1. Not satisfied                           |
|             | 9     | 2       | 2. Neither                                 |
|             | 521   | 3       | 3. Satisfied                               |
|             | 51    | .       | .                                          |
|             | 2847  | .a      | .a. Did not receive service                |
|             | 5     | .m      | .m. Missing                                |
|             | 7     | .s      | .s. Skipped by participant                 |
|             | 5     | .w      | .w. Answered 6 mon survey at 6<br>wk visit |
|             | 699   | .x      | .x. No 6 week survey                       |

w6\_205

205: HTC: Waiting time at health facility (min)

type: numeric (int)  
label: numserv, but 53 nonmissing values are not labeled  
range: [1,2400] units: 1  
unique values: 53 missing .: 51/4168  
unique mv codes: 6 missing .\*: 3567/4168  
examples: .a .a. Did not receive service  
.a .a. Did not receive service  
.a .a. Did not receive service  
.a .a. Did not receive service

w6\_206

206: HTC: Travel time to health facility (min)

type: numeric (int)  
label: hfttime, but 46 nonmissing values are not labeled  
range: [1,240] units: 1  
unique values: 46 missing .: 51/4168  
unique mv codes: 6 missing .\*: 3567/4168  
examples: .a .a. Did not receive service  
.a .a. Did not receive service  
.a .a. Did not receive service  
.a .a. Did not receive service

w6\_207

207: HTC: Travel mode to health facility

type: numeric (byte)  
label: hftmode  
range: [1,7] units: 1  
unique values: 7 missing .: 51/4168  
unique mv codes: 6 missing .\*: 3568/4168

```

tabulation:  Freq.  Numeric  Label
              167      1  1. Bus
              57      2  2. Taxi
              13      3  3. Someone drove in private car
               9      4  4. Drove self
             269      5  5. Walked
              32      6  6. Bicycle
               2      7  7. Other
              51      .
            2847      .a  .a. Did not receive service
               5      .m  .m. Missing
              12      .s  .s. Skipped by participant
               5      .w  .w. Answered 6 mon survey at 6
                   wk visit
             699      .x  .x. No 6 week survey

```

-----  
w6\_208

208: HTC: Transport cost  
-----

```

type:  numeric (byte)
label:  hftcost, but 23 nonmissing values are not labeled

range:  [0,100]           units:  1
unique values: 24         missing  .:  51/4168
unique mv codes: 7       missing  .*: 3877/4168

```

```

tabulation:  Freq.  Numeric  Label
              21      0  0. Nothing
               1      1
              24      2
              32      3
              24      4
              46      5
               3      6
               3      7
               2      8
              27     10
               2     12
               1     14
              14     15
               1     18
              18     20
               3     25
               1     28
               9     30
               1     35
               1     40
               1     45
               3     50
               1     60
               1    100
              51      .
            2847      .a  .a. Did not receive service
             310      .b  .b. Own car, walked, biked
               5      .m  .m. Missing
              11      .s  .s. Skipped by participant
               5      .w  .w. Answered 6 mon survey at 6
                   wk visit
             699      .x  .x. No 6 week survey

```

-----  
w6\_209

209: HTC: Distance traveled (km)  
-----

```

type:  numeric (int)
label:  hftkm, but 24 nonmissing values are not labeled

range:  [0,888]           units:  1
unique values: 26         missing  .:  51/4168

```



unique mv codes: 6

missing .\*: 3612/4168

| tabulation: | Freq. | Numeric | Label                                   |
|-------------|-------|---------|-----------------------------------------|
|             | 31    | 0       | 0. <1                                   |
|             | 63    | 1       |                                         |
|             | 50    | 2       |                                         |
|             | 34    | 3       |                                         |
|             | 23    | 4       |                                         |
|             | 20    | 5       |                                         |
|             | 18    | 6       |                                         |
|             | 4     | 7       |                                         |
|             | 4     | 8       |                                         |
|             | 1     | 9       |                                         |
|             | 6     | 10      |                                         |
|             | 1     | 11      |                                         |
|             | 3     | 12      |                                         |
|             | 1     | 13      |                                         |
|             | 1     | 14      |                                         |
|             | 5     | 15      |                                         |
|             | 5     | 20      |                                         |
|             | 1     | 21      |                                         |
|             | 1     | 25      |                                         |
|             | 1     | 27      |                                         |
|             | 2     | 30      |                                         |
|             | 1     | 40      |                                         |
|             | 1     | 45      |                                         |
|             | 1     | 60      |                                         |
|             | 1     | 99      |                                         |
|             | 226   | 888     | 888. Don't Know                         |
|             | 51    | .       |                                         |
|             | 2847  | .a      | .a. Did not receive service             |
|             | 5     | .m      | .m. Missing                             |
|             | 56    | .s      | .s. Skipped by participant              |
|             | 5     | .w      | .w. Answered 6 mon survey at 6 wk visit |
|             | 699   | .x      | .x. No 6 week survey                    |

w6\_210

210: HTC: Source of transport money

type: numeric (byte)  
label: hftsource

|                  |       |             |           |
|------------------|-------|-------------|-----------|
| range:           | [1,6] | units:      | 1         |
| unique values:   | 6     | missing .:  | 51/4168   |
| unique mv codes: | 8     | missing .*: | 3898/4168 |

| tabulation: | Freq. | Numeric | Label                                   |
|-------------|-------|---------|-----------------------------------------|
|             | 19    | 1       | 1. Cutting down on other expenses       |
|             | 107   | 2       | 2. Savings                              |
|             | 11    | 3       | 3. Borrowing                            |
|             | 3     | 4       | 4. Selling assets                       |
|             | 56    | 5       | 5. Donation                             |
|             | 23    | 6       | 6. Other                                |
|             | 51    | .       |                                         |
|             | 2847  | .a      | .a. Did not receive service             |
|             | 21    | .b      | .b. Did not pay for transport           |
|             | 310   | .c      | .c. Own car, walked, biked              |
|             | 5     | .m      | .m. Missing                             |
|             | 11    | .s      | .s. Skipped by participant              |
|             | 5     | .w      | .w. Answered 6 mon survey at 6 wk visit |
|             | 699   | .x      | .x. No 6 week survey                    |

w6\_211

211: HTC: What respondent would be doing if not at health facility

```

    type: numeric (byte)
    label: hfnot

    range: [1,6]                units: 1
    unique values: 6            missing .: 51/4168
    unique mv codes: 6         missing .*: 3568/4168

```

```

tabulation: Freq.  Numeric  Label
            113      1      1. Paid employment
            118      2      2. Own business
            119      3      3. Unpaid work/Housework
             53      4      4. In school
            108      5      5. Resting/No specific activity
             38      6      6. Other
             51      .
            2847     .a     .a. Did not receive service
             5       .m     .m. Missing
             12     .s     .s. Skipped by participant
             5       .w     .w. Answered 6 mon survey at 6
                   wk visit
            699     .x     .x. No 6 week survey

```

-----  
w6\_300            300: HIV Care/Trt: Respondent understands to only include services from last 6 w  
-----

```

    type: numeric (byte)
    label: yesnoserv

    range: [1,1]                units: 1
    unique values: 1            missing .: 51/4168
    unique mv codes: 6         missing .*: 3796/4168

```

```

tabulation: Freq.  Numeric  Label
            321      1      1. Yes
             51      .
            3083     .a     .a. Did not receive service
             7       .m     .m. Missing
             2       .s     .s. Skipped by participant
             5       .w     .w. Answered 6 mon survey at 6
                   wk visit
            699     .x     .x. No 6 week survey

```

-----  
w6\_301            301: HIV Care/Trt: numservber times to health facility  
-----

```

    type: numeric (byte)
    label: numserv, but 6 nonmissing values are not labeled

    range: [1,6]                units: 1
    unique values: 6            missing .: 51/4168
    unique mv codes: 6         missing .*: 3826/4168

```

```

tabulation: Freq.  Numeric  Label
            159      1
             70      2
             29      3
             16      4
              7      5
             10      6
             51      .
            3083     .a     .a. Did not receive service
             7       .m     .m. Missing
             32     .s     .s. Skipped by participant
             5       .w     .w. Answered 6 mon survey at 6
                   wk visit
            699     .x     .x. No 6 week survey

```

-----

w6\_302

302: HIV Care/Trt: Health facility name

```

type: string (str43)
unique values: 101          missing "": 801/4168
examples:  "."
           ". "
           ". ."
           ". ."
warning: variable has embedded blanks

```

w6\_303

303: HIV Care/Trt: Alone or accompanied

```

type: numeric (byte)
label: hfpeople

range: [1,3]          units: 1
unique values: 3      missing .: 51/4168
unique mv codes: 6    missing .*: 3832/4168

tabulation: Freq.  Numeric  Label
            205      1      1. Alone
            57       2      2. Spouse/Partner
            23       3      3. Someone else
            51       .
            3083     .a     .a. Did not receive service
            5        .m     .m. Missing
            40       .s     .s. Skipped by participant
            5        .w     .w. Answered 6 mon survey at 6
                   wk visit
            699     .x     .x. No 6 week survey

```

w6\_304

304: HIV Care/Trt: Satisfied with services

```

type: numeric (byte)
label: hfsat

range: [1,3]          units: 1
unique values: 3      missing .: 51/4168
unique mv codes: 6    missing .*: 3828/4168

tabulation: Freq.  Numeric  Label
            20      1      1. Not satisfied
            5       2      2. Neither
            264     3      3. Satisfied
            51      .
            3083   .a     .a. Did not receive service
            5      .m     .m. Missing
            36     .s     .s. Skipped by participant
            5      .w     .w. Answered 6 mon survey at 6
                   wk visit
            699   .x     .x. No 6 week survey

```

w6\_305

305: HIV Care/Trt: Waiting time at health facility (min)

```

type: numeric (int)
label: numserv, but 51 nonmissing values are not labeled

range: [1,855]        units: 1
unique values: 51     missing .: 51/4168
unique mv codes: 6    missing .*: 3832/4168

```

examples: .a .a. Did not receive service  
.a .a. Did not receive service  
.a .a. Did not receive service  
.a .a. Did not receive service

w6\_306

306: HIV Care/Trt: TB testing

type: numeric (byte)  
label: yesnoserv  
range: [0,1] units: 1  
unique values: 2 missing .: 51/4168  
unique mv codes: 6 missing .\*: 3801/4168

| tabulation: | Freq. | Numeric | Label                                      |
|-------------|-------|---------|--------------------------------------------|
|             | 255   | 0       | 0. No                                      |
|             | 61    | 1       | 1. Yes                                     |
|             | 51    | .       | .                                          |
|             | 3083  | .a      | .a. Did not receive service                |
|             | 5     | .m      | .m. Missing                                |
|             | 9     | .s      | .s. Skipped by participant                 |
|             | 5     | .w      | .w. Answered 6 mon survey at 6<br>wk visit |
|             | 699   | .x      | .x. No 6 week survey                       |

w6\_307

307: HIV Care/Trt: CD4 testing

type: numeric (byte)  
label: yesnoserv  
range: [0,88] units: 1  
unique values: 3 missing .: 51/4168  
unique mv codes: 6 missing .\*: 3800/4168

| tabulation: | Freq. | Numeric | Label                                      |
|-------------|-------|---------|--------------------------------------------|
|             | 170   | 0       | 0. No                                      |
|             | 146   | 1       | 1. Yes                                     |
|             | 1     | 88      | 88. Don't Know                             |
|             | 51    | .       | .                                          |
|             | 3083  | .a      | .a. Did not receive service                |
|             | 5     | .m      | .m. Missing                                |
|             | 8     | .s      | .s. Skipped by participant                 |
|             | 5     | .w      | .w. Answered 6 mon survey at 6<br>wk visit |
|             | 699   | .x      | .x. No 6 week survey                       |

w6\_308

308: HIV Care/Trt: Eligible for ARV

type: numeric (byte)  
label: w6\_308  
range: [0,88] units: 1  
unique values: 3 missing .: 51/4168  
unique mv codes: 7 missing .\*: 3969/4168

| tabulation: | Freq. | Numeric | Label                                |
|-------------|-------|---------|--------------------------------------|
|             | 55    | 0       | 0. No                                |
|             | 91    | 1       | 1. Yes                               |
|             | 2     | 88      | 88. Don't Know                       |
|             | 51    | .       | .                                    |
|             | 3083  | .a      | .a. Did not receive service          |
|             | 170   | .b      | .b. Have not received CD4<br>testing |

```

5      .m  .m. Missing
7      .s  .s. Skipped by participant
5      .w  .w. Answered 6 mon survey at 6
        wk visit
699    .x  .x. No 6 week survey

```

w6\_309

309: HIV Care/Trt: Initiated ARV

```

type: numeric (byte)
label: w6_309

range: [0,1]          units: 1
unique values: 2      missing .: 51/4168
unique mv codes: 8    missing .*: 4024/4168

```

```

tabulation: Freq.  Numeric  Label
            10         0      0. No
            83         1      1. Yes
            51         .
          3083         .a      .a. Did not receive service
            170         .b      .b. Have not received CD4
                testing
            55         .c      .c. Not eligible for ARV
             5         .m      .m. Missing
             7         .s      .s. Skipped by participant
             5         .w      .w. Answered 6 mon survey at 6
                wk visit
          699         .x      .x. No 6 week survey

```

w6\_310

310: HIV Care/Trt: numservber missed follow-ups since started ARV

```

type: numeric (byte)
label: w6_310, but 2 nonmissing values are not labeled

range: [0,2]          units: 1
unique values: 3      missing .: 51/4168
unique mv codes: 9    missing .*: 4034/4168

```

```

tabulation: Freq.  Numeric  Label
            81         0      0. Never
             1         1
             1         2
            51         .
          3083         .a      .a. Did not receive service
            170         .b      .b. Have not received CD4
                testing
            55         .c      .c. Not eligible for ARV
            10         .d      .d. Did not initiate ARV
             5         .m      .m. Missing
             7         .s      .s. Skipped by participant
             5         .w      .w. Answered 6 mon survey at 6
                wk visit
          699         .x      .x. No 6 week survey

```

w6\_311

311: HIV Care/Trt: numservber missed doses ARV

```

type: numeric (byte)
label: w6_311, but 4 nonmissing values are not labeled

range: [0,5]          units: 1
unique values: 5      missing .: 51/4168
unique mv codes: 9    missing .*: 4034/4168

```

```

tabulation: Freq.  Numeric  Label

```

```

        68      0 0. Never
        8       1
        5       2
        1       4
        1       5
       51      .
     3083     .a .a. Did not receive service
     170     .b .b. Have not received CD4
           testing
     55     .c .c. Not eligible for ARV
     10     .d .d. Did not initiate ARV
        5     .m .m. Missing
        7     .s .s. Skipped by participant
        5     .w .w. Answered 6 mon survey at 6
           wk visit
     699     .x .x. No 6 week survey

```

-----  
w6\_312

312: HIV Care/Trt: Participated in psycho-social support groups  
-----

```

type: numeric (byte)
label: yesnoserv

range: [0,1]                  units: 1
unique values: 2              missing .: 51/4168
unique mv codes: 6           missing .*: 3801/4168

```

```

tabulation: Freq.   Numeric  Label
            239      0      0. No
            77       1      1. Yes
            51       .
     3083     .a      .a. Did not receive service
            5       .m      .m. Missing
            9       .s      .s. Skipped by participant
            5       .w      .w. Answered 6 mon survey at 6
           wk visit
     699     .x      .x. No 6 week survey

```

-----  
w6\_313

313: HIV Care/Trt: Travel time to health facility (min)  
-----

```

type: numeric (int)
label: hfttime, but 33 nonmissing values are not labeled

range: [2,888]              units: 1
unique values: 34           missing .: 51/4168
unique mv codes: 6         missing .*: 3830/4168

```

```

examples: .a      .a. Did not receive service
          .a      .a. Did not receive service
          .a      .a. Did not receive service
          .a      .a. Did not receive service

```

-----  
w6\_314

314: HIV Care/Trt: Travel mode to health facility  
-----

```

type: numeric (byte)
label: hftmode

range: [1,7]                units: 1
unique values: 7            missing .: 51/4168
unique mv codes: 6         missing .*: 3830/4168

```

```

tabulation: Freq.   Numeric  Label
            88       1      1. Bus
            26       2      2. Taxi
            3        3      3. Someone drove in private car

```

```

      4      4 4. Drove self
    151     5 5. Walked
     14     6 6. Bicycle
      1     7 7. Other
     51     .
    3083   .a .a. Did not receive service
      5     .m .m. Missing
     38     .s .s. Skipped by participant
      5     .w .w. Answered 6 mon survey at 6
           wk visit
     699   .x .x. No 6 week survey

```

w6\_315

315: HIV Care/Trt: Transport cost

```

type: numeric (byte)
label: hftcost, but 20 nonmissing values are not labeled

range: [0,93]          units: 1
unique values: 21      missing .: 51/4168
unique mv codes: 7     missing .*: 3993/4168

```

```

tabulation: Freq.  Numeric  Label
            11      0      0. Nothing
             1      1
             7      2
            21      3
            16      4
            21      5
             2      6
             4      7
             2      8
             2      9
            10     10
             2     12
             3     15
             1     18
            11     20
             2     25
             4     30
             1     35
             1     40
             1     50
             1     93
            51     .
    3083   .a .a. Did not receive service
    169   .b .b. Own car, walked, biked
      5   .m .m. Missing
     32   .s .s. Skipped by participant
      5   .w .w. Answered 6 mon survey at 6
           wk visit
     699   .x .x. No 6 week survey

```

w6\_316

316: HIV Care/Trt: Distance traveled (km)

```

type: numeric (int)
label: hftkm, but 16 nonmissing values are not labeled

range: [0,888]        units: 1
unique values: 18     missing .: 51/4168
unique mv codes: 6    missing .*: 3836/4168

```

```

tabulation: Freq.  Numeric  Label
            22      0      0. <1
            19      1
            22      2
            20      3

```

```

10      4
12      5
7       6
4       7
3       8
4       10
1       12
1       13
1       14
3       15
2       20
2       45
1       60
147     888 888. Don't Know
51      .
3083    .a .a. Did not receive service
5       .m .m. Missing
44      .s .s. Skipped by participant
5       .w .w. Answered 6 mon survey at 6
        wk visit
699     .x .x. No 6 week survey

```

w6\_317

317: HIV Care/Trt: Source of transport money

```

type: numeric (byte)
label: hftsource

```

```

range: [1,6]          units: 1
unique values: 6      missing .: 51/4168
unique mv codes: 8    missing .*: 4003/4168

```

```

tabulation: Freq.  Numeric  Label
            13      1      1. Cutting down on other
            54      2      2. Savings
            4       3      3. Borrowing
            2       4      4. Selling assets
            35      5      5. Donation
            6       6      6. Other
            51      .
3083       .a      .a. Did not receive service
            11      .b      .b. Did not pay for transport
            169     .c      .c. Own car, walked, biked
            5       .m      .m. Missing
            31      .s      .s. Skipped by participant
            5       .w      .w. Answered 6 mon survey at 6
            wk visit
            699     .x      .x. No 6 week survey

```

w6\_318

318: HIV Care/Trt: What respondent would be doing if not at health facility

```

type: numeric (byte)
label: hfnot

```

```

range: [1,6]          units: 1
unique values: 6      missing .: 51/4168
unique mv codes: 6    missing .*: 3832/4168

```

```

tabulation: Freq.  Numeric  Label
            46      1      1. Paid employment
            69      2      2. Own business
            78      3      3. Unpaid work/Housework
            13      4      4. In school
            63      5      5. Resting/No specific activity
            16      6      6. Other
            51      .

```



```

3083 .a .a. Did not receive service
5 .m .m. Missing
40 .s .s. Skipped by participant
5 .w .w. Answered 6 mon survey at 6
wk visit
699 .x .x. No 6 week survey

```

-----  
w6\_400 400: STI Care/Trt: Respondent understands to only include services from last 6 w  
-----

```

type: numeric (byte)
label: yesnoserv

range: [1,1] units: 1
unique values: 1 missing .: 51/4168
unique mv codes: 6 missing .*: 3980/4168

```

```

tabulation: Freq. Numeric Label
137 1 1. Yes
51 .
3263 .a .a. Did not receive service
5 .m .m. Missing
8 .s .s. Skipped by participant
5 .w .w. Answered 6 mon survey at 6
wk visit
699 .x .x. No 6 week survey

```

-----  
w6\_401 401: STI Care/Trt: numservber times to health facility  
-----

```

type: numeric (byte)
label: numserv, but 6 nonmissing values are not labeled

range: [1,6] units: 1
unique values: 6 missing .: 51/4168
unique mv codes: 6 missing .*: 3992/4168

```

```

tabulation: Freq. Numeric Label
75 1
26 2
15 3
3 4
4 5
2 6
51 .
3263 .a .a. Did not receive service
5 .m .m. Missing
20 .s .s. Skipped by participant
5 .w .w. Answered 6 mon survey at 6
wk visit
699 .x .x. No 6 week survey

```

-----  
w6\_402 402: STI Care/Trt: Health facility name  
-----

```

type: string (str43)

unique values: 65 missing "": 755/4168

examples: "."
          ". "
          ". ."
          ". ."

```

```

warning: variable has embedded blanks

```

-----

w6\_403

403: STI Care/Trt: Alone or accompanied

```

type: numeric (byte)
label: hfpeople

range: [1,3]          units: 1
unique values: 3      missing .: 51/4168
unique mv codes: 6    missing .*: 3985/4168

```

```

tabulation: Freq.  Numeric  Label
             86         1    1. Alone
             31         2    2. Spouse/Partner
             15         3    3. Someone else
             51         .
            3263        .a    .a. Did not receive service
             5         .m    .m. Missing
             13         .s    .s. Skipped by participant
             5         .w    .w. Answered 6 mon survey at 6
                    wk visit
            699         .x    .x. No 6 week survey

```

w6\_404

404: STI Care/Trt: Satisfied with services

```

type: numeric (byte)
label: hfsat

range: [1,3]          units: 1
unique values: 3      missing .: 51/4168
unique mv codes: 6    missing .*: 3986/4168

```

```

tabulation: Freq.  Numeric  Label
             15         1    1. Not satisfied
             6         2    2. Neither
            110         3    3. Satisfied
             51         .
            3263        .a    .a. Did not receive service
             5         .m    .m. Missing
             14         .s    .s. Skipped by participant
             5         .w    .w. Answered 6 mon survey at 6
                    wk visit
            699         .x    .x. No 6 week survey

```

w6\_405

405: STI Care/Trt: Waiting time at health facility (min)

```

type: numeric (int)
label: numserv, but 28 nonmissing values are not labeled

range: [2,1800]      units: 1
unique values: 28    missing .: 51/4168
unique mv codes: 6    missing .*: 3991/4168

```

```

tabulation: Freq.  Numeric  Label
             2         2
             1         3
             5         5
             2         6
             1         8
             4         10
             6         15
             6         20
            30         30
             1         35
             4         40
             1         41
             4         45

```

```

      2      50
     14      60
      1      63
      1      70
     12      90
     10     120
      1     121
      1     150
      1     160
      7     180
      5     240
      1     250
      1     300
      1     480
      1    1800
     51      .
    3263   .a   .a. Did not receive service
      5     .m   .m. Missing
     19     .s   .s. Skipped by participant
      5     .w   .w. Answered 6 mon survey at 6
                wk visit
     699     .x   .x. No 6 week survey

```

-----  
w6\_406

406: STI Care/Trt: Need medicine for STD  
-----

```

      type: numeric (byte)
      label: yesnoserv

      range: [0,1]                units: 1
  unique values: 2                missing .: 51/4168
  unique mv codes: 6             missing .*: 3989/4168

```

```

  tabulation: Freq.  Numeric  Label
                67         0   0. No
                61         1   1. Yes
                 51         .
            3263   .a   .a. Did not receive service
                 5     .m   .m. Missing
                 17     .s   .s. Skipped by participant
                 5     .w   .w. Answered 6 mon survey at 6
                        wk visit
            699     .x   .x. No 6 week survey

```

-----  
w6\_407

407: STI Care/Trt: Place obtained medicine  
-----

```

      type: numeric (byte)
      label: w6_407

      range: [1,3]                units: 1
  unique values: 3                missing .: 51/4168
  unique mv codes: 7             missing .*: 4054/4168

```

```

  tabulation: Freq.  Numeric  Label
                46         1   1. At health facility
                12         2   2. Somewhere else
                 5         3   3. Did not get medicine
                 51         .
            3263   .a   .a. Did not receive service
                 67     .b   .b. Did not need medicine
                 5     .m   .m. Missing
                 15     .s   .s. Skipped by participant
                 5     .w   .w. Answered 6 mon survey at 6
                        wk visit
            699     .x   .x. No 6 week survey

```

-----

```

type: numeric (byte)
label: w6_408, but 12 nonmissing values are not labeled

range: [0,100]                units: 1
unique values: 13              missing .: 51/4168
unique mv codes: 8             missing .*: 4060/4168

```

| tabulation: | Freq. | Numeric | Label                                      |
|-------------|-------|---------|--------------------------------------------|
|             | 34    | 0       | 0. Nothing                                 |
|             | 1     | 4       |                                            |
|             | 3     | 10      |                                            |
|             | 1     | 11      |                                            |
|             | 1     | 14      |                                            |
|             | 1     | 15      |                                            |
|             | 6     | 20      |                                            |
|             | 2     | 30      |                                            |
|             | 1     | 37      |                                            |
|             | 2     | 50      |                                            |
|             | 1     | 55      |                                            |
|             | 1     | 56      |                                            |
|             | 3     | 100     |                                            |
|             | 51    | .       |                                            |
|             | 3263  | .a      | .a. Did not receive service                |
|             | 67    | .b      | .b. Did not need medicine                  |
|             | 5     | .c      | .c. Did not get medicine                   |
|             | 5     | .m      | .m. Missing                                |
|             | 16    | .s      | .s. Skipped by participant                 |
|             | 5     | .w      | .w. Answered 6 mon survey at 6<br>wk visit |
|             | 699   | .x      | .x. No 6 week survey                       |

```

type: numeric (int)
label: hfttime, but 23 nonmissing values are not labeled

range: [1,888]                units: 1
unique values: 24              missing .: 51/4168
unique mv codes: 6             missing .*: 3993/4168

```

| tabulation: | Freq. | Numeric | Label           |
|-------------|-------|---------|-----------------|
|             | 1     | 1       |                 |
|             | 1     | 3       |                 |
|             | 5     | 5       |                 |
|             | 2     | 6       |                 |
|             | 1     | 8       |                 |
|             | 10    | 10      |                 |
|             | 1     | 12      |                 |
|             | 4     | 15      |                 |
|             | 7     | 20      |                 |
|             | 2     | 25      |                 |
|             | 33    | 30      |                 |
|             | 2     | 35      |                 |
|             | 8     | 40      |                 |
|             | 10    | 45      |                 |
|             | 1     | 46      |                 |
|             | 2     | 50      |                 |
|             | 20    | 60      |                 |
|             | 1     | 70      |                 |
|             | 1     | 75      |                 |
|             | 5     | 90      |                 |
|             | 1     | 120     |                 |
|             | 1     | 140     |                 |
|             | 1     | 218     |                 |
|             | 4     | 888     | 888. Don't Know |

```

51      .
3263   .a  .a. Did not receive service
5       .m  .m. Missing
21     .s  .s. Skipped by participant
5       .w  .w. Answered 6 mon survey at 6
        wk visit
699    .x  .x. No 6 week survey

```

w6\_410

410: STI Care/Trt: Travel mode to health faciity

```

type: numeric (byte)
label: hftmode

```

```

range: [1,6]          units: 1
unique values: 6      missing .: 51/4168
unique mv codes: 6    missing .*: 3991/4168

```

```

tabulation: Freq.  Numeric  Label
              29         1  1. Bus
              18         2  2. Taxi
               1         3  3. Someone drove in private car
               4         4  4. Drove self
              62         5  5. Walked
              12         6  6. Bicycle
              51         .
            3263   .a  .a. Did not receive service
               5       .m  .m. Missing
              19     .s  .s. Skipped by participant
               5       .w  .w. Answered 6 mon survey at 6
                   wk visit
            699    .x  .x. No 6 week survey

```

w6\_411

411: STI Care/Trt: Transport cost

```

type: numeric (byte)
label: hftcost, but 11 nonmissing values are not labeled

```

```

range: [0,60]        units: 1
unique values: 12    missing .: 51/4168
unique mv codes: 7   missing .*: 4068/4168

```

```

tabulation: Freq.  Numeric  Label
              3         0  0. Nothing
              3         2
             10         3
               5         4
               8         5
               6        10
               2        15
               2        20
               2        25
               5        30
               2        40
               1        60
              51         .
            3263   .a  .a. Did not receive service
              78     .b  .b. Own car, walked, biked
               5       .m  .m. Missing
              18     .s  .s. Skipped by participant
               5       .w  .w. Answered 6 mon survey at 6
                   wk visit
            699    .x  .x. No 6 week survey

```

w6\_412

412: STI Care/Trt: Distance traveled (km)

```

type: numeric (byte)
label: hftkm, but 14 nonmissing values are not labeled

range: [0,88]          units: 1
unique values: 15      missing .: 51/4168
unique mv codes: 6     missing .*: 3993/4168

```

```

tabulation: Freq.   Numeric   Label
             12        0      0. <1
              9        1
             16        2
              6        3
              6        4
              2        5
              4        6
              3        7
              1        8
              2       10
              1       13
              1       20
              1       30
              1       60
             59       88
             51        .
          3263       .a   .a. Did not receive service
              5       .m   .m. Missing
             21       .s   .s. Skipped by participant
              5       .w   .w. Answered 6 mon survey at 6
                   wk visit
             699       .x   .x. No 6 week survey

```

-----  
w6\_413

413: STI Care/Trt: Source of transport money  
-----

```

type: numeric (byte)
label: hftsource

range: [1,5]          units: 1
unique values: 5      missing .: 51/4168
unique mv codes: 8     missing .*: 4071/4168

```

```

tabulation: Freq.   Numeric   Label
             3        1      1. Cutting down on other
                   expenses
             23        2      2. Savings
              3        3      3. Borrowing
              1        4      4. Selling assets
             16        5      5. Donation
             51        .
          3263       .a   .a. Did not receive service
              3       .b   .b. Did not pay for transport
             78       .c   .c. Own car, walked, biked
              5       .m   .m. Missing
             18       .s   .s. Skipped by participant
              5       .w   .w. Answered 6 mon survey at 6
                   wk visit
             699       .x   .x. No 6 week survey

```

-----  
w6\_414

414: STI Care/Trt: What respondent would be doing if not at health facility  
-----

```

type: numeric (byte)
label: hfnot

range: [1,6]          units: 1
unique values: 6      missing .: 51/4168
unique mv codes: 6     missing .*: 3990/4168

```

```

tabulation:  Freq.  Numeric  Label
              27      1      1. Paid employment
              25      2      2. Own business
              27      3      3. Unpaid work/Housework
              11      4      4. In school
              28      5      5. Resting/No specific activity
              9       6      6. Other
              51      .
            3263    .a     .a. Did not receive service
              5      .m     .m. Missing
              18      .s     .s. Skipped by participant
              5      .w     .w. Answered 6 mon survey at 6
                   wk visit
            699    .x     .x. No 6 week survey

```

```
-----
w6_500_f          500: FP: Respondent understands to only include services from last 6 weeks
-----
```

```

      type: numeric (byte)
      label: yesnoserv

      range: [1,1]                units: 1
unique values: 1                  missing .: 51/4168
unique mv codes: 7                missing .*: 3903/4168

```

```

tabulation:  Freq.  Numeric  Label
              214      1      1. Yes
              51      .
            1565    .a     .a. Did not receive service
            1630    .g     .g. Gender skip pattern
              2      .m     .m. Missing
              2      .s     .s. Skipped by participant
              5      .w     .w. Answered 6 mon survey at 6
                   wk visit
            699    .x     .x. No 6 week survey

```

```
-----
w6_501_f          501: FP: numservber times to health facility
-----
```

```

      type: numeric (byte)
      label: numserv, but 6 nonmissing values are not labeled

      range: [1,6]                units: 1
unique values: 6                  missing .: 51/4168
unique mv codes: 7                missing .*: 3918/4168

```

```

tabulation:  Freq.  Numeric  Label
              173      1
              15      2
              8       3
              1       4
              1       5
              1       6
              51      .
            1565    .a     .a. Did not receive service
            1630    .g     .g. Gender skip pattern
              2      .m     .m. Missing
              17      .s     .s. Skipped by participant
              5      .w     .w. Answered 6 mon survey at 6
                   wk visit
            699    .x     .x. No 6 week survey

```

```
-----
w6_502_f          502: FP: Health facility name
-----
```

```

      type: string (str56)

```

unique values: 75 missing "": 755/4168

examples: "."  
"."  
"."  
"."

warning: variable has embedded blanks

-----  
w6\_503\_f

503: FP: Alone or accompanied  
-----

type: numeric (byte)  
label: hfpeople

range: [1,3] units: 1  
unique values: 3 missing .: 51/4168  
unique mv codes: 7 missing .\*: 3916/4168

| tabulation: | Freq. | Numeric | Label                                      |
|-------------|-------|---------|--------------------------------------------|
|             | 168   | 1       | 1. Alone                                   |
|             | 21    | 2       | 2. Spouse/Partner                          |
|             | 12    | 3       | 3. Someone else                            |
|             | 51    | .       | .                                          |
|             | 1565  | .a      | .a. Did not receive service                |
|             | 1630  | .g      | .g. Gender skip pattern                    |
|             | 2     | .m      | .m. Missing                                |
|             | 15    | .s      | .s. Skipped by participant                 |
|             | 5     | .w      | .w. Answered 6 mon survey at 6<br>wk visit |
|             | 699   | .x      | .x. No 6 week survey                       |

-----  
w6\_504\_f

504: FP: Satisfied with services  
-----

type: numeric (byte)  
label: hfsat

range: [1,3] units: 1  
unique values: 3 missing .: 51/4168  
unique mv codes: 7 missing .\*: 3915/4168

| tabulation: | Freq. | Numeric | Label                                      |
|-------------|-------|---------|--------------------------------------------|
|             | 10    | 1       | 1. Not satisfied                           |
|             | 4     | 2       | 2. Neither                                 |
|             | 188   | 3       | 3. Satisfied                               |
|             | 51    | .       | .                                          |
|             | 1565  | .a      | .a. Did not receive service                |
|             | 1630  | .g      | .g. Gender skip pattern                    |
|             | 2     | .m      | .m. Missing                                |
|             | 14    | .s      | .s. Skipped by participant                 |
|             | 5     | .w      | .w. Answered 6 mon survey at 6<br>wk visit |
|             | 699   | .x      | .x. No 6 week survey                       |

-----  
w6\_505\_f

505: FP: Waiting time at health facility (min)  
-----

type: numeric (int)  
label: numserv, but 35 nonmissing values are not labeled

range: [1,420] units: 1  
unique values: 35 missing .: 51/4168  
unique mv codes: 7 missing .\*: 3920/4168

examples: .a .a. Did not receive service



.a .a. Did not receive service  
.g .g. Gender skip pattern  
.g .g. Gender skip pattern

-----  
w6\_506\_f 506: FP: Currently pregnant  
-----

type: numeric (byte)  
label: yesnoserv  
range: [0,88] units: 1  
unique values: 3 missing .: 51/4168  
unique mv codes: 7 missing .\*: 3904/4168

| tabulation: | Freq. | Numeric | Label                                      |
|-------------|-------|---------|--------------------------------------------|
|             | 209   | 0       | 0. No                                      |
|             | 2     | 1       | 1. Yes                                     |
|             | 2     | 88      | 88. Don't Know                             |
|             | 51    | .       | .                                          |
|             | 1565  | .a      | .a. Did not receive service                |
|             | 1630  | .g      | .g. Gender skip pattern                    |
|             | 2     | .m      | .m. Missing                                |
|             | 3     | .s      | .s. Skipped by participant                 |
|             | 5     | .w      | .w. Answered 6 mon survey at 6<br>wk visit |
|             | 699   | .x      | .x. No 6 week survey                       |

-----  
w6\_507\_f 507: FP: Currently using FP  
-----

type: numeric (byte)  
label: w6\_507  
range: [0,1] units: 1  
unique values: 2 missing .: 51/4168  
unique mv codes: 8 missing .\*: 3905/4168

| tabulation: | Freq. | Numeric | Label                                      |
|-------------|-------|---------|--------------------------------------------|
|             | 19    | 0       | 0. No                                      |
|             | 193   | 1       | 1. Yes                                     |
|             | 51    | .       | .                                          |
|             | 1565  | .a      | .a. Did not receive service                |
|             | 2     | .b      | .b. Currently pregnant                     |
|             | 1630  | .g      | .g. Gender skip pattern                    |
|             | 2     | .m      | .m. Missing                                |
|             | 2     | .s      | .s. Skipped by participant                 |
|             | 5     | .w      | .w. Answered 6 mon survey at 6<br>wk visit |
|             | 699   | .x      | .x. No 6 week survey                       |

-----  
w6\_508a\_f 508: FP: Method: Female sterilization  
-----

type: numeric (byte)  
label: w6\_508a  
range: [0,0] units: 1  
unique values: 1 missing .: 51/4168  
unique mv codes: 9 missing .\*: 3924/4168

| tabulation: | Freq. | Numeric | Label                       |
|-------------|-------|---------|-----------------------------|
|             | 193   | 0       | 0. No                       |
|             | 51    | .       | .                           |
|             | 1565  | .a      | .a. Did not receive service |
|             | 2     | .b      | .b. Currently pregnant      |
|             | 19    | .c      | .c. Not using any method    |
|             | 1630  | .g      | .g. Gender skip pattern     |

```

      2      .m .m. Missing
      2      .s .s. Skipped by participant
      5      .w .w. Answered 6 mon survey at 6
           wk visit
    699      .x .x. No 6 week survey

```

w6\_508b\_f

508: FP: Method: Male sterilization

```

      type: numeric (byte)
      label: w6_508b

      range: [0,1]                units: 1
      unique values: 2             missing .: 51/4168
      unique mv codes: 9           missing .*: 3924/4168

```

```

      tabulation: Freq.  Numeric  Label
                  192      0      0. No
                  1       1      1. Yes
                  51      .
                1565      .a     .a. Did not receive service
                  2       .b     .b. Currently pregnant
                  19      .c     .c. Not using any method
                1630      .g     .g. Gender skip pattern
                  2       .m     .m. Missing
                  2       .s     .s. Skipped by participant
                  5       .w     .w. Answered 6 mon survey at 6
                   wk visit
                699      .x     .x. No 6 week survey

```

w6\_508c\_f

508: FP: Method: Pill

```

      type: numeric (byte)
      label: w6_508c

      range: [0,1]                units: 1
      unique values: 2             missing .: 51/4168
      unique mv codes: 9           missing .*: 3924/4168

```

```

      tabulation: Freq.  Numeric  Label
                  162      0      0. No
                  31      1      1. Yes
                  51      .
                1565      .a     .a. Did not receive service
                  2       .b     .b. Currently pregnant
                  19      .c     .c. Not using any method
                1630      .g     .g. Gender skip pattern
                  2       .m     .m. Missing
                  2       .s     .s. Skipped by participant
                  5       .w     .w. Answered 6 mon survey at 6
                   wk visit
                699      .x     .x. No 6 week survey

```

w6\_508d\_f

508: FP: Method: IUD

```

      type: numeric (byte)
      label: w6_508d

      range: [0,1]                units: 1
      unique values: 2             missing .: 51/4168
      unique mv codes: 9           missing .*: 3924/4168

```

```

      tabulation: Freq.  Numeric  Label
                  173      0      0. No
                  20      1      1. Yes

```

```

51      .
1565    .a .a. Did not receive service
2       .b .b. Currently pregnant
19      .c .c. Not using any method
1630    .g .g. Gender skip pattern
2       .m .m. Missing
2       .s .s. Skipped by participant
5       .w .w. Answered 6 mon survey at 6
        wk visit
699     .x .x. No 6 week survey

```

-----  
w6\_508e\_f

508: FP: Method: Injectables  
-----

```

type: numeric (byte)
label: w6_508e

range: [0,1]          units: 1
unique values: 2      missing .: 51/4168
unique mv codes: 9    missing .*: 3924/4168

```

```

tabulation: Freq.  Numeric  Label
            124      0      0. No
            69      1      1. Yes
            51      .
            1565     .a     .a. Did not receive service
            2       .b     .b. Currently pregnant
            19      .c     .c. Not using any method
            1630    .g     .g. Gender skip pattern
            2       .m     .m. Missing
            2       .s     .s. Skipped by participant
            5       .w     .w. Answered 6 mon survey at 6
                wk visit
            699     .x     .x. No 6 week survey

```

-----  
w6\_508f\_f

508: FP: Method: Implants  
-----

```

type: numeric (byte)
label: w6_508f

range: [0,1]          units: 1
unique values: 2      missing .: 51/4168
unique mv codes: 9    missing .*: 3924/4168

```

```

tabulation: Freq.  Numeric  Label
            131      0      0. No
            62      1      1. Yes
            51      .
            1565     .a     .a. Did not receive service
            2       .b     .b. Currently pregnant
            19      .c     .c. Not using any method
            1630    .g     .g. Gender skip pattern
            2       .m     .m. Missing
            2       .s     .s. Skipped by participant
            5       .w     .w. Answered 6 mon survey at 6
                wk visit
            699     .x     .x. No 6 week survey

```

-----  
w6\_508g\_f

508: FP: Method: Male condom  
-----

```

type: numeric (byte)
label: w6_508g

range: [0,1]          units: 1
unique values: 2      missing .: 51/4168

```

unique mv codes: 9 missing .\*: 3924/4168

| tabulation: | Freq. | Numeric | Label                                      |
|-------------|-------|---------|--------------------------------------------|
|             | 167   | 0       | 0. No                                      |
|             | 26    | 1       | 1. Yes                                     |
|             | 51    | .       | .                                          |
|             | 1565  | .a      | .a. Did not receive service                |
|             | 2     | .b      | .b. Currently pregnant                     |
|             | 19    | .c      | .c. Not using any method                   |
|             | 1630  | .g      | .g. Gender skip pattern                    |
|             | 2     | .m      | .m. Missing                                |
|             | 2     | .s      | .s. Skipped by participant                 |
|             | 5     | .w      | .w. Answered 6 mon survey at 6<br>wk visit |
|             | 699   | .x      | .x. No 6 week survey                       |

-----  
w6\_508h\_f

508: FP: Method: Female condom  
-----

type: numeric (byte)  
label: w6\_508h

range: [0,1] units: 1  
unique values: 2 missing .: 51/4168  
unique mv codes: 9 missing .\*: 3924/4168

| tabulation: | Freq. | Numeric | Label                                      |
|-------------|-------|---------|--------------------------------------------|
|             | 192   | 0       | 0. No                                      |
|             | 1     | 1       | 1. Yes                                     |
|             | 51    | .       | .                                          |
|             | 1565  | .a      | .a. Did not receive service                |
|             | 2     | .b      | .b. Currently pregnant                     |
|             | 19    | .c      | .c. Not using any method                   |
|             | 1630  | .g      | .g. Gender skip pattern                    |
|             | 2     | .m      | .m. Missing                                |
|             | 2     | .s      | .s. Skipped by participant                 |
|             | 5     | .w      | .w. Answered 6 mon survey at 6<br>wk visit |
|             | 699   | .x      | .x. No 6 week survey                       |

-----  
w6\_508i\_f

508: FP: Method: Diaphragm  
-----

type: numeric (byte)  
label: w6\_508i

range: [0,1] units: 1  
unique values: 2 missing .: 51/4168  
unique mv codes: 9 missing .\*: 3924/4168

| tabulation: | Freq. | Numeric | Label                                      |
|-------------|-------|---------|--------------------------------------------|
|             | 190   | 0       | 0. No                                      |
|             | 3     | 1       | 1. Yes                                     |
|             | 51    | .       | .                                          |
|             | 1565  | .a      | .a. Did not receive service                |
|             | 2     | .b      | .b. Currently pregnant                     |
|             | 19    | .c      | .c. Not using any method                   |
|             | 1630  | .g      | .g. Gender skip pattern                    |
|             | 2     | .m      | .m. Missing                                |
|             | 2     | .s      | .s. Skipped by participant                 |
|             | 5     | .w      | .w. Answered 6 mon survey at 6<br>wk visit |
|             | 699   | .x      | .x. No 6 week survey                       |

-----  
w6\_508j\_f

508: FP: Method: Foam/Jelly  
-----

```

    type: numeric (byte)
    label: w6_508j

    range: [0,0]                units: 1
    unique values: 1            missing .: 51/4168
    unique mv codes: 9          missing .*: 3924/4168

```

```

tabulation: Freq.  Numeric  Label
            193      0      0. No
            51       .
            1565     .a     .a. Did not receive service
            2        .b     .b. Currently pregnant
            19       .c     .c. Not using any method
            1630     .g     .g. Gender skip pattern
            2        .m     .m. Missing
            2        .s     .s. Skipped by participant
            5        .w     .w. Answered 6 mon survey at 6
                   wk visit
            699     .x     .x. No 6 week survey

```

-----  
w6\_508k\_f 508: FP: Method: Lactational amenorrhea method  
-----

```

    type: numeric (byte)
    label: w6_508k

    range: [0,0]                units: 1
    unique values: 1            missing .: 51/4168
    unique mv codes: 9          missing .*: 3924/4168

```

```

tabulation: Freq.  Numeric  Label
            193      0      0. No
            51       .
            1565     .a     .a. Did not receive service
            2        .b     .b. Currently pregnant
            19       .c     .c. Not using any method
            1630     .g     .g. Gender skip pattern
            2        .m     .m. Missing
            2        .s     .s. Skipped by participant
            5        .w     .w. Answered 6 mon survey at 6
                   wk visit
            699     .x     .x. No 6 week survey

```

-----  
w6\_508l\_f 508: FP: Method: Rhythm method  
-----

```

    type: numeric (byte)
    label: w6_508l

    range: [0,0]                units: 1
    unique values: 1            missing .: 51/4168
    unique mv codes: 9          missing .*: 3924/4168

```

```

tabulation: Freq.  Numeric  Label
            193      0      0. No
            51       .
            1565     .a     .a. Did not receive service
            2        .b     .b. Currently pregnant
            19       .c     .c. Not using any method
            1630     .g     .g. Gender skip pattern
            2        .m     .m. Missing
            2        .s     .s. Skipped by participant
            5        .w     .w. Answered 6 mon survey at 6
                   wk visit
            699     .x     .x. No 6 week survey

```

-----  
w6\_508m\_f 508: FP: Method: Withdrawal  
-----

```

-----
type: numeric (byte)
label: w6_508m

range: [0,1] units: 1
unique values: 2 missing .: 51/4168
unique mv codes: 9 missing .*: 3924/4168

```

```

tabulation: Freq. Numeric Label
             192      0 0. No
              1      1 1. Yes
              51      .
            1565     .a .a. Did not receive service
               2     .b .b. Currently pregnant
              19     .c .c. Not using any method
            1630     .g .g. Gender skip pattern
               2     .m .m. Missing
               2     .s .s. Skipped by participant
               5     .w .w. Answered 6 mon survey at 6
                   wk visit
             699     .x .x. No 6 week survey

```

```

-----
w6_508n_f 508: FP: Method: Other method
-----

```

```

type: numeric (byte)
label: w6_508n

range: [0,1] units: 1
unique values: 2 missing .: 51/4168
unique mv codes: 9 missing .*: 3924/4168

```

```

tabulation: Freq. Numeric Label
             192      0 0. No
              1      1 1. Yes
              51      .
            1565     .a .a. Did not receive service
               2     .b .b. Currently pregnant
              19     .c .c. Not using any method
            1630     .g .g. Gender skip pattern
               2     .m .m. Missing
               2     .s .s. Skipped by participant
               5     .w .w. Answered 6 mon survey at 6
                   wk visit
             699     .x .x. No 6 week survey

```

```

-----
w6_509_f 509: FP: numservber days forgot pill in past month
-----

```

```

type: numeric (byte)
label: w6_509, but 5 nonmissing values are not labeled

range: [0,5] units: 1
unique values: 6 missing .: 51/4168
unique mv codes: 10 missing .*: 4086/4168

```

```

tabulation: Freq. Numeric Label
             20      0 0. Never
               4      1
               2      2
               2      3
               2      4
               1      5
              51      .
            1565     .a .a. Did not receive service
               2     .b .b. Currently pregnant
              19     .c .c. Not using any method

```

```

162      .d .d. Not taking pill
1630     .g .g. Gender skip pattern
2        .m .m. Missing
2        .s .s. Skipped by participant
5        .w .w. Answered 6 mon survey at 6
          wk visit
699     .x .x. No 6 week survey

```

-----  
w6\_510\_f

510: FP: numservber times had sex without condom  
-----

```

type: numeric (byte)
label: w6_510

```

```

range: [.,.]          units: .
unique values: 0      missing .: 51/4168
unique mv codes: 11   missing .*: 4117/4168

```

```

tabulation: Freq.  Numeric  Label
             51         .
             1565      .a .a. Did not receive service
              2        .b .b. Currently pregnant
              19        .c .c. Not using any method
             166        .d .d. Not currently using condoms
              27        .e .e. Programming skip error: Had
                       to say yes to male and female
                       condom to answer this question
             1630      .g .g. Gender skip pattern
              2        .m .m. Missing
              2        .s .s. Skipped by participant
              5        .w .w. Answered 6 mon survey at 6
                       wk visit
             699     .x .x. No 6 week survey

```

-----  
w6\_511\_f

511: FP: Travel time to health facility (min)  
-----

```

type: numeric (int)
label: hfttime, but 20 nonmissing values are not labeled

```

```

range: [1,888]          units: 1
unique values: 21      missing .: 51/4168
unique mv codes: 7     missing .*: 3920/4168

```

```

tabulation: Freq.  Numeric  Label
             1         1
             1         3
              9         5
             19        10
              1        11
              1        12
             12        15
              1        16
             25        20
              2        25
              1        28
             44        30
             12        40
             13        45
              3        50
             30        60
              4        90
              6       120
              2       130
              2       180
              8       888 888. Don't Know
             51         .
            1565      .a .a. Did not receive service

```

```

1630 .g .g. Gender skip pattern
2 .m .m. Missing
19 .s .s. Skipped by participant
5 .w .w. Answered 6 mon survey at 6
wk visit
699 .x .x. No 6 week survey

```

-----  
w6\_512\_f

512: FP: Travel mode to health faciity  
-----

```

type: numeric (byte)
label: hftmode

```

```

range: [1,6] units: 1
unique values: 6 missing .: 51/4168
unique mv codes: 7 missing .*: 3920/4168

```

```

tabulation: Freq. Numeric Label
83 1 1. Bus
12 2 2. Taxi
5 3 3. Someone drove in private car
1 4 4. Drove self
89 5 5. Walked
7 6 6. Bicycle
51 .
1565 .a .a. Did not receive service
1630 .g .g. Gender skip pattern
2 .m .m. Missing
19 .s .s. Skipped by participant
5 .w .w. Answered 6 mon survey at 6
wk visit
699 .x .x. No 6 week survey

```

-----  
w6\_513\_f

513: FP: Transport cost  
-----

```

type: numeric (byte)
label: hftcost, but 14 nonmissing values are not labeled

```

```

range: [0,40] units: 1
unique values: 15 missing .: 51/4168
unique mv codes: 8 missing .*: 4018/4168

```

```

tabulation: Freq. Numeric Label
6 0 0. Nothing
2 1
20 2
20 3
11 4
14 5
4 6
1 7
10 10
1 12
2 15
4 20
2 25
1 30
1 40
51 .
1565 .a .a. Did not receive service
97 .b .b. Own car, walked, biked
1630 .g .g. Gender skip pattern
2 .m .m. Missing
20 .s .s. Skipped by participant
5 .w .w. Answered 6 mon survey at 6
wk visit
699 .x .x. No 6 week survey

```



w6\_514\_f

514: FP: Distance traveled (km)

type: numeric (int)  
label: hftkm, but 11 nonmissing values are not labeled  
range: [0,888] units: 1  
unique values: 13 missing .: 51/4168  
unique mv codes: 7 missing .\*: 3966/4168

| tabulation: | Freq. | Numeric | Label                                      |
|-------------|-------|---------|--------------------------------------------|
|             | 23    | 0       | 0. <1                                      |
|             | 14    | 1       |                                            |
|             | 13    | 2       |                                            |
|             | 15    | 3       |                                            |
|             | 7     | 4       |                                            |
|             | 7     | 5       |                                            |
|             | 2     | 6       |                                            |
|             | 2     | 7       |                                            |
|             | 1     | 23      |                                            |
|             | 1     | 30      |                                            |
|             | 1     | 40      |                                            |
|             | 1     | 50      |                                            |
|             | 64    | 888     | 888. Don't Know                            |
|             | 51    | .       |                                            |
|             | 1565  | .a      | .a. Did not receive service                |
|             | 1630  | .g      | .g. Gender skip pattern                    |
|             | 2     | .m      | .m. Missing                                |
|             | 65    | .s      | .s. Skipped by participant                 |
|             | 5     | .w      | .w. Answered 6 mon survey at 6<br>wk visit |
|             | 699   | .x      | .x. No 6 week survey                       |

w6\_515\_f

515: FP: Source of transport money

type: numeric (byte)  
label: hftsource  
range: [1,6] units: 1  
unique values: 6 missing .: 51/4168  
unique mv codes: 9 missing .\*: 4024/4168

| tabulation: | Freq. | Numeric | Label                                      |
|-------------|-------|---------|--------------------------------------------|
|             | 8     | 1       | 1. Cutting down on other<br>expenses       |
|             | 31    | 2       | 2. Savings                                 |
|             | 2     | 3       | 3. Borrowing                               |
|             | 1     | 4       | 4. Selling assets                          |
|             | 38    | 5       | 5. Donation                                |
|             | 13    | 6       | 6. Other                                   |
|             | 51    | .       |                                            |
|             | 1565  | .a      | .a. Did not receive service                |
|             | 6     | .b      | .b. Did not pay for transport              |
|             | 97    | .c      | .c. Own car, walked, biked                 |
|             | 1630  | .g      | .g. Gender skip pattern                    |
|             | 2     | .m      | .m. Missing                                |
|             | 20    | .s      | .s. Skipped by participant                 |
|             | 5     | .w      | .w. Answered 6 mon survey at 6<br>wk visit |
|             | 699   | .x      | .x. No 6 week survey                       |

w6\_516\_f

516: FP: What respondent would be doing if not at health facility

type: numeric (byte)

```

label: hfnot

range: [1,6] units: 1
unique values: 6 missing .: 51/4168
unique mv codes: 7 missing .*: 3920/4168

```

```

tabulation: Freq. Numeric Label
            22      1  1. Paid employment
            41      2  2. Own business
            83      3  3. Unpaid work/Housework
             6      4  4. In school
            39      5  5. Resting/No specific activity
             6      6  6. Other
            51      .
           1565     .a .a. Did not receive service
           1630     .g .g. Gender skip pattern
             2     .m .m. Missing
            19     .s .s. Skipped by participant
             5     .w .w. Answered 6 mon survey at 6
                wk visit
           699     .x .x. No 6 week survey

```

```

-----
w6_600_f          600: CCS: Respondent understands to only include services from last 6 weeks
-----

```

```

type: numeric (byte)
label: yesnoserv

```

```

range: [1,1] units: 1
unique values: 1 missing .: 51/4168
unique mv codes: 7 missing .*: 3831/4168

```

```

tabulation: Freq. Numeric Label
            286      1  1. Yes
            51      .
           1494     .a .a. Did not receive service
           1630     .g .g. Gender skip pattern
             2     .m .m. Missing
             1     .s .s. Skipped by participant
             5     .w .w. Answered 6 mon survey at 6
                wk visit
           699     .x .x. No 6 week survey

```

```

-----
w6_601_f          601: CCS: numservber times to health facility
-----

```

```

type: numeric (byte)
label: numserv, but 6 nonmissing values are not labeled

```

```

range: [1,6] units: 1
unique values: 6 missing .: 51/4168
unique mv codes: 7 missing .*: 3834/4168

```

```

tabulation: Freq. Numeric Label
            234      1
            38      2
             6      3
             2      4
             2      5
             1      6
            51      .
           1494     .a .a. Did not receive service
           1630     .g .g. Gender skip pattern
             2     .m .m. Missing
             4     .s .s. Skipped by participant
             5     .w .w. Answered 6 mon survey at 6
                wk visit
           699     .x .x. No 6 week survey

```

w6\_602\_f

602: CCS: Health facility name

```
-----
type: string (str28)
unique values: 64          missing "": 755/4168
examples:  "."
           ". "
           ". "
           ". "
warning: variable has embedded blanks
-----
```

w6\_603\_f

603: CCS: Alone or accompanied

```
-----
type: numeric (byte)
label: hfpeople
range: [1,3]          units: 1
unique values: 3      missing .: 51/4168
unique mv codes: 7    missing .*: 3835/4168
tabulation:
  Freq.  Numeric  Label
    175     1    1. Alone
     11     2    2. Spouse/Partner
     96     3    3. Someone else
     51     .
  1494    .a    .a. Did not receive service
  1630    .g    .g. Gender skip pattern
     2     .m    .m. Missing
     5     .s    .s. Skipped by participant
     5     .w    .w. Answered 6 mon survey at 6
                    wk visit
    699    .x    .x. No 6 week survey
-----
```

w6\_604\_f

604: CCS: Satisfied with services

```
-----
type: numeric (byte)
label: hfsat
range: [1,3]          units: 1
unique values: 3      missing .: 51/4168
unique mv codes: 7    missing .*: 3835/4168
tabulation:
  Freq.  Numeric  Label
    14     1    1. Not satisfied
     2     2    2. Neither
    266     3    3. Satisfied
     51     .
  1494    .a    .a. Did not receive service
  1630    .g    .g. Gender skip pattern
     2     .m    .m. Missing
     5     .s    .s. Skipped by participant
     5     .w    .w. Answered 6 mon survey at 6
                    wk visit
    699    .x    .x. No 6 week survey
-----
```

w6\_605\_f

605: CCS: Waiting time at health facility (min)

```
-----
type: numeric (int)
label: numserv, but 42 nonmissing values are not labeled
-----
```

```

range: [1,2400] units: 1
unique values: 42 missing .: 51/4168
unique mv codes: 7 missing .*: 3837/4168

examples: .a .a. Did not receive service
          .a .a. Did not receive service
          .g .g. Gender skip pattern
          .g .g. Gender skip pattern

```

-----  
w6\_606\_f 606: CCS: Travel time to health facility (min)  
-----

```

type: numeric (int)
label: hfttime, but 29 nonmissing values are not labeled

range: [1,888] units: 1
unique values: 30 missing .: 51/4168
unique mv codes: 7 missing .*: 3838/4168

```

| tabulation: | Freq. | Numeric | Label                                      |
|-------------|-------|---------|--------------------------------------------|
|             | 2     | 1       |                                            |
|             | 6     | 5       |                                            |
|             | 1     | 7       |                                            |
|             | 27    | 10      |                                            |
|             | 1     | 12      |                                            |
|             | 35    | 15      |                                            |
|             | 21    | 20      |                                            |
|             | 3     | 25      |                                            |
|             | 1     | 28      |                                            |
|             | 49    | 30      |                                            |
|             | 11    | 40      |                                            |
|             | 22    | 45      |                                            |
|             | 5     | 50      |                                            |
|             | 39    | 60      |                                            |
|             | 2     | 62      |                                            |
|             | 1     | 63      |                                            |
|             | 1     | 67      |                                            |
|             | 1     | 69      |                                            |
|             | 1     | 70      |                                            |
|             | 1     | 75      |                                            |
|             | 1     | 81      |                                            |
|             | 1     | 85      |                                            |
|             | 3     | 90      |                                            |
|             | 2     | 100     |                                            |
|             | 2     | 118     |                                            |
|             | 20    | 120     |                                            |
|             | 1     | 130     |                                            |
|             | 1     | 190     |                                            |
|             | 2     | 240     |                                            |
|             | 16    | 888     | 888. Don't Know                            |
|             | 51    | .       | .                                          |
|             | 1494  | .a      | .a. Did not receive service                |
|             | 1630  | .g      | .g. Gender skip pattern                    |
|             | 3     | .m      | .m. Missing                                |
|             | 7     | .s      | .s. Skipped by participant                 |
|             | 5     | .w      | .w. Answered 6 mon survey at 6<br>wk visit |
|             | 699   | .x      | .x. No 6 week survey                       |

-----  
w6\_607\_f 607: CCS: Travel mode to health facility  
-----

```

type: numeric (byte)
label: hftmode

range: [1,6] units: 1
unique values: 6 missing .: 51/4168

```

unique mv codes: 7 missing .\*: 3836/4168

| tabulation: | Freq. | Numeric | Label                                   |
|-------------|-------|---------|-----------------------------------------|
|             | 84    | 1       | 1. Bus                                  |
|             | 69    | 2       | 2. Taxi                                 |
|             | 3     | 3       | 3. Someone drove in private car         |
|             | 1     | 4       | 4. Drove self                           |
|             | 115   | 5       | 5. Walked                               |
|             | 9     | 6       | 6. Bicycle                              |
|             | 51    | .       | .                                       |
|             | 1494  | .a      | .a. Did not receive service             |
|             | 1630  | .g      | .g. Gender skip pattern                 |
|             | 3     | .m      | .m. Missing                             |
|             | 5     | .s      | .s. Skipped by participant              |
|             | 5     | .w      | .w. Answered 6 mon survey at 6 wk visit |
|             | 699   | .x      | .x. No 6 week survey                    |

-----  
w6\_608\_f

608: CCS: Transport cost  
-----

type: numeric (byte)  
label: hftcost, but 15 nonmissing values are not labeled

range: [0,80] units: 1  
unique values: 16 missing .: 51/4168  
unique mv codes: 8 missing .\*: 3964/4168

| tabulation: | Freq. | Numeric | Label                                   |
|-------------|-------|---------|-----------------------------------------|
|             | 42    | 0       | 0. Nothing                              |
|             | 3     | 1       |                                         |
|             | 15    | 2       |                                         |
|             | 15    | 3       |                                         |
|             | 19    | 4       |                                         |
|             | 18    | 5       |                                         |
|             | 3     | 6       |                                         |
|             | 3     | 8       |                                         |
|             | 14    | 10      |                                         |
|             | 5     | 15      |                                         |
|             | 8     | 20      |                                         |
|             | 2     | 25      |                                         |
|             | 1     | 28      |                                         |
|             | 2     | 35      |                                         |
|             | 2     | 60      |                                         |
|             | 1     | 80      |                                         |
|             | 51    | .       | .                                       |
|             | 1494  | .a      | .a. Did not receive service             |
|             | 125   | .b      | .b. Own car, walked, biked              |
|             | 1630  | .g      | .g. Gender skip pattern                 |
|             | 3     | .m      | .m. Missing                             |
|             | 8     | .s      | .s. Skipped by participant              |
|             | 5     | .w      | .w. Answered 6 mon survey at 6 wk visit |
|             | 699   | .x      | .x. No 6 week survey                    |

-----  
w6\_609\_f

609: CCS: Distance traveled (km)  
-----

type: numeric (int)  
label: hftkm, but 14 nonmissing values are not labeled

range: [0,888] units: 1  
unique values: 16 missing .: 51/4168  
unique mv codes: 7 missing .\*: 3861/4168

| tabulation: | Freq. | Numeric | Label |
|-------------|-------|---------|-------|
|             | 32    | 0       | 0. <1 |
|             | 21    | 1       |       |

```

37      2
18      3
15      4
5       5
2       6
2       8
2       9
1      10
1      14
1      16
1      19
1      30
1      60
116     888 888. Don't Know
51      .
1494    .a  .a. Did not receive service
1630    .g  .g. Gender skip pattern
3       .m  .m. Missing
30      .s  .s. Skipped by participant
5       .w  .w. Answered 6 mon survey at 6
          wk visit
699     .x  .x. No 6 week survey

```

-----  
w6\_610\_f

610: CCS: Source of transport money  
-----

```

type: numeric (byte)
label: hftsource

```

```

range: [1,6]          units: 1
unique values: 6      missing .: 51/4168
unique mv codes: 9    missing .*: 4007/4168

```

```

tabulation: Freq.  Numeric  Label
              12         1  1. Cutting down on other
              30         2  2. Savings
               2         3  3. Borrowing
               2         4  4. Selling assets
              43         5  5. Donation
              21         6  6. Other
              51         .
1494          .a  .a. Did not receive service
              42         .b  .b. Did not pay for transport
              125        .c  .c. Own car, walked, biked
1630          .g  .g. Gender skip pattern
               3         .m  .m. Missing
               9         .s  .s. Skipped by participant
               5         .w  .w. Answered 6 mon survey at 6
                   wk visit
              699        .x  .x. No 6 week survey

```

-----  
w6\_611\_f

611: CCS: What respondent would be doing if not at health facility  
-----

```

type: numeric (byte)
label: hfnot

```

```

range: [1,6]          units: 1
unique values: 6      missing .: 51/4168
unique mv codes: 7    missing .*: 3835/4168

```

```

tabulation: Freq.  Numeric  Label
              22         1  1. Paid employment
              58         2  2. Own business
             140         3  3. Unpaid work/Housework
               9         4  4. In school
              41         5  5. Resting/No specific activity

```

```

        12         6 6. Other
        51         .
1494     .a .a. Did not receive service
1630     .g .g. Gender skip pattern
         3         .m .m. Missing
         4         .s .s. Skipped by participant
         5         .w .w. Answered 6 mon survey at 6
                           wk visit
        699     .x .x. No 6 week survey
```

-----  
w6\_700\_m           700: VMMC: Respondent understands to only include services from last 6 weeks  
-----

```

      type: numeric (byte)
      label: yesnoserv

      range: [1,1]                                           units: 1
unique values: 1                                           missing .: 51/4168
unique mv codes: 7                                         missing .*: 3821/4168
```

```

tabulation: Freq.   Numeric   Label
            296       1   1. Yes
            51        .
            1325     .a .a. Did not receive service
            1783     .g .g. Gender skip pattern
             7        .m .m. Missing
             2        .s .s. Skipped by participant
             5        .w .w. Answered 6 mon survey at 6
                           wk visit
            699     .x .x. No 6 week survey
```

-----  
w6\_701\_m           701: VMMC: numservber times to health facility  
-----

```

      type: numeric (byte)
      label: numserv, but 6 nonmissing values are not labeled

      range: [1,6]                                           units: 1
unique values: 6                                           missing .: 51/4168
unique mv codes: 7                                         missing .*: 3821/4168
```

```

tabulation: Freq.   Numeric   Label
            153       1
            62        2
            62        3
            15        4
             2         5
             2         6
            51        .
            1325     .a .a. Did not receive service
            1783     .g .g. Gender skip pattern
             6        .m .m. Missing
             3        .s .s. Skipped by participant
             5        .w .w. Answered 6 mon survey at 6
                           wk visit
            699     .x .x. No 6 week survey
```

-----  
w6\_702\_m           702: VMMC: Health facility name  
-----

```

      type: string (str58)

unique values: 56                                           missing "": 755/4168

examples:  "."
           ". "
           ". "
```

."

warning: variable has embedded blanks

-----  
w6\_703\_m 703: VMMC: Alone or accompanied  
-----

type: numeric (byte)  
label: hfpeople  
  
range: [1,3] units: 1  
unique values: 3 missing .: 51/4168  
unique mv codes: 7 missing .\*: 3834/4168

| tabulation: | Freq. | Numeric | Label                                      |
|-------------|-------|---------|--------------------------------------------|
|             | 196   | 1       | 1. Alone                                   |
|             | 23    | 2       | 2. Spouse/Partner                          |
|             | 64    | 3       | 3. Someone else                            |
|             | 51    | .       | .                                          |
|             | 1325  | .a      | .a. Did not receive service                |
|             | 1783  | .g      | .g. Gender skip pattern                    |
|             | 6     | .m      | .m. Missing                                |
|             | 16    | .s      | .s. Skipped by participant                 |
|             | 5     | .w      | .w. Answered 6 mon survey at 6<br>wk visit |
|             | 699   | .x      | .x. No 6 week survey                       |

-----  
w6\_704\_m 704: VMMC: Satisfied with services  
-----

type: numeric (byte)  
label: hfsat  
  
range: [1,3] units: 1  
unique values: 3 missing .: 51/4168  
unique mv codes: 7 missing .\*: 3835/4168

| tabulation: | Freq. | Numeric | Label                                      |
|-------------|-------|---------|--------------------------------------------|
|             | 8     | 1       | 1. Not satisfied                           |
|             | 9     | 2       | 2. Neither                                 |
|             | 265   | 3       | 3. Satisfied                               |
|             | 51    | .       | .                                          |
|             | 1325  | .a      | .a. Did not receive service                |
|             | 1783  | .g      | .g. Gender skip pattern                    |
|             | 6     | .m      | .m. Missing                                |
|             | 17    | .s      | .s. Skipped by participant                 |
|             | 5     | .w      | .w. Answered 6 mon survey at 6<br>wk visit |
|             | 699   | .x      | .x. No 6 week survey                       |

-----  
w6\_705\_m 705: VMMC: Waiting time at health facility (min)  
-----

type: numeric (int)  
label: numserv, but 32 nonmissing values are not labeled  
  
range: [1,480] units: 1  
unique values: 32 missing .: 51/4168  
unique mv codes: 7 missing .\*: 3834/4168

examples: .a .a. Did not receive service  
.g .g. Gender skip pattern  
.g .g. Gender skip pattern  
.g .g. Gender skip pattern

-----  
w6\_706\_m 706: VMMC: Weeks since circumcision  
-----



```

-----
type: numeric (byte)
label: w6_706

range: [0,6] units: 1
unique values: 7 missing .: 51/4168
unique mv codes: 7 missing .*: 3844/4168

```

```

tabulation: Freq. Numeric Label
             3         0 0. Did not get circumcised
             3         1 1. 1 week ago
            10         2 2. 2 weeks ago
             4         3 3. 3 weeks ago
            16         4 4. 4 weeks ago
            27         5 5. 5 weeks ago
           210         6 6. 6 weeks ago
            51         .
          1325        .a .a. Did not receive service
          1783        .g .g. Gender skip pattern
             6         .m .m. Missing
            26         .s .s. Skipped by participant
             5         .w .w. Answered 6 mon survey at 6
                wk visit
           699        .x .x. No 6 week survey

```

```

-----
w6_707_m                                707: VMCM: Resumed sexual activity since circumcison
-----

```

```

type: numeric (byte)
label: w6_707

range: [0,1] units: 1
unique values: 2 missing .: 51/4168
unique mv codes: 8 missing .*: 3826/4168

```

```

tabulation: Freq. Numeric Label
             200        0 0. No
             91         1 1. Yes
            51         .
          1325        .a .a. Did not receive service
             3         .b .b. Did not get circumcised
          1783        .g .g. Gender skip pattern
             7         .m .m. Missing
             4         .s .s. Skipped by participant
             5         .w .w. Answered 6 mon survey at 6
                wk visit
           699        .x .x. No 6 week survey

```

```

-----
w6_708_m                                708: VMCM: Weeks after circumcision resumed sexual activity
-----

```

```

type: numeric (byte)
label: w6_708

range: [0,6] units: 1
unique values: 7 missing .: 51/4168
unique mv codes: 9 missing .*: 4035/4168

```

```

tabulation: Freq. Numeric Label
             2         0 0. <1 week
             2         1 1. 1 week
             9         2 2. 2 weeks
             4         3 3. 3 weeks
            18         4 4. 4 weeks
            15         5 5. 5 weeks
            32         6 6. 6 weeks
            51         .

```

```

1325 .a .a. Did not receive service
3 .b .b. Did not get circumcised
200 .c .c. Have not resumed sexual
activity
1783 .g .g. Gender skip pattern
7 .m .m. Missing
13 .s .s. Skipped by participant
5 .w .w. Answered 6 mon survey at 6
wk visit
699 .x .x. No 6 week survey

```

-----  
w6\_709\_m

709: VMMC: Travel time to health facility (min)  
-----

```

type: numeric (int)
label: hfttime, but 26 nonmissing values are not labeled

range: [2,888]          units: 1
unique values: 27      missing .: 51/4168
unique mv codes: 7     missing .*: 3837/4168

```

```

tabulation: Freq.  Numeric  Label
             1         2
             2         4
            15         5
             1         6
             1         7
             1         8
            21        10
             3        14
            22        15
             1        18
            24        20
             6        25
            59        30
             7        35
            14        40
            19        45
             3        50
            47        60
             1        65
             1        75
             2        80
            13        90
             1        95
             2       100
             8       120
             1       180
             4       888  888. Don't Know
            51      .
          1325     .a  .a. Did not receive service
          1783     .g  .g. Gender skip pattern
             7     .m  .m. Missing
            18     .s  .s. Skipped by participant
             5     .w  .w. Answered 6 mon survey at 6
                wk visit
          699     .x  .x. No 6 week survey

```

-----  
w6\_710\_m

710: VMMC: Travel mode to health facility  
-----

```

type: numeric (byte)
label: hftmode

range: [1,7]          units: 1
unique values: 7      missing .: 51/4168
unique mv codes: 7     missing .*: 3835/4168

```

```

tabulation:  Freq.  Numeric  Label
              56      1      1. Bus
              44      2      2. Taxi
               7      3      3. Someone drove in private car
               9      4      4. Drove self
             146      5      5. Walked
              18      6      6. Bicycle
               2      7      7. Other
              51      .
            1325      .a      .a. Did not receive service
            1783      .g      .g. Gender skip pattern
               7      .m      .m. Missing
              16      .s      .s. Skipped by participant
               5      .w      .w. Answered 6 mon survey at 6
                    wk visit
             699      .x      .x. No 6 week survey

```

-----  
w6\_711\_m

711: VMMC: Transport cost  
-----

```

      type: numeric (byte)
      label: hftcost, but 16 nonmissing values are not labeled

      range: [0,50]                units: 1
  unique values: 17                missing  .: 51/4168
  unique mv codes: 8                missing  .*: 4010/4168

```

```

tabulation:  Freq.  Numeric  Label
              16      0      0. Nothing
               3      1
               5      2
              15      3
               7      4
              19      5
               2      6
               2      7
               2      8
              13      10
              10      15
               1      17
               6      20
               1      25
               2      30
               2      40
               1      50
              51      .
            1325      .a      .a. Did not receive service
              173      .b      .b. Own car, walked, biked
            1783      .g      .g. Gender skip pattern
               7      .m      .m. Missing
              18      .s      .s. Skipped by participant
               5      .w      .w. Answered 6 mon survey at 6
                    wk visit
             699      .x      .x. No 6 week survey

```

-----  
w6\_712\_m

712: VMMC: Distance traveled (km)  
-----

```

      type: numeric (int)
      label: hftkm, but 16 nonmissing values are not labeled

      range: [0,888]                units: 1
  unique values: 18                missing  .: 51/4168
  unique mv codes: 7                missing  .*: 3837/4168

```

```

tabulation:  Freq.  Numeric  Label
              17      0      0. <1
              18      1

```

```

41      2
47      3
30      4
17      5
18      6
5       7
5       8
2       9
13     10
2      12
1      14
11     15
1      21
1      30
1      60
50     888 888. Don't Know
51     .
1325  .a .a. Did not receive service
1783  .g .g. Gender skip pattern
7     .m .m. Missing
18    .s .s. Skipped by participant
5     .w .w. Answered 6 mon survey at 6
      wk visit
699   .x .x. No 6 week survey

```

-----  
w6\_713\_m

713: VMMC: Source of transport money  
-----

```

type: numeric (byte)
label: hftsource

```

```

range: [1,6]          units: 1
unique values: 5      missing .: 51/4168
unique mv codes: 9    missing .*: 4025/4168

```

```

tabulation: Freq.  Numeric  Label
             17      1      1. Cutting down on other
             43      2      2. Savings
              5      3      3. Borrowing
             24      5      5. Donation
              3      6      6. Other
             51      .
            1325  .a .a. Did not receive service
             16      .b .b. Did not pay for transport
            173      .c .c. Own car, walked, biked
            1783  .g .g. Gender skip pattern
              7      .m .m. Missing
             17      .s .s. Skipped by participant
              5      .w .w. Answered 6 mon survey at 6
             699   .x .x. No 6 week survey

```

-----  
w6\_714\_m

714: VMMC: What respondent would be doing if not at health facility  
-----

```

type: numeric (byte)
label: hfnot

```

```

range: [1,6]          units: 1
unique values: 6      missing .: 51/4168
unique mv codes: 7    missing .*: 3836/4168

```

```

tabulation: Freq.  Numeric  Label
             77      1      1. Paid employment
             45      2      2. Own business
             13      3      3. Unpaid work/Housework
             62      4      4. In school

```

```
66      5  5. Resting/No specific activity
18      6  6. Other
51      .
1325   .a  .a. Did not receive service
1783   .g  .g. Gender skip pattern
7      .m  .m. Missing
17     .s  .s. Skipped by participant
5      .w  .w. Answered 6 mon survey at 6
      wk visit
699    .x  .x. No 6 week survey
```

```
-----
w6_800      800: Self-rated health in past YEAR: 1 (very bad) - 10 (very good)
-----
```

```
type: numeric (byte)
label: w6_num, but 10 nonmissing values are not labeled

range: [1,10]          units: 1
unique values: 10      missing .: 51/4168
unique mv codes: 3     missing .*: 708/4168
```

```
tabulation: Freq.  Numeric  Label
             13      1
             10      2
             17      3
            250      4
            132      5
            145      6
            881      7
            441      8
            514      9
           1006     10
             51      .
             9      .m  .m. Missing
           699     .x  .x. No 6 week survey
```

```
-----
w6_801      801: Self-rated health in past MONTH: 1 (very bad) - 10 (very good)
-----
```

```
type: numeric (byte)
label: w6_num, but 10 nonmissing values are not labeled

range: [1,10]          units: 1
unique values: 10      missing .: 51/4168
unique mv codes: 3     missing .*: 707/4168
```

```
tabulation: Freq.  Numeric  Label
             11      1
             12      2
             25      3
            201      4
            109      5
            137      6
            770      7
            431      8
            519      9
           1195     10
             51      .
             8      .m  .m. Missing
           699     .x  .x. No 6 week survey
```

```
-----
w6_802a      802: Health problems past month: Fever
-----
```

```
type: numeric (byte)
label: w6_yesno
```

range: [0,1] units: 1  
unique values: 2 missing .: 51/4168  
unique mv codes: 4 missing .\*: 709/4168

| tabulation: | Freq. | Numeric | Label                      |
|-------------|-------|---------|----------------------------|
|             | 2810  | 0       | 0. No                      |
|             | 598   | 1       | 1. Yes                     |
|             | 51    | .       | .                          |
|             | 9     | .m      | .m. Missing                |
|             | 1     | .s      | .s. Skipped by participant |
|             | 699   | .x      | .x. No 6 week survey       |

-----  
w6\_802b 802: Health problems past month: Night sweat  
-----

type: numeric (byte)  
label: w6\_yesno

range: [0,1] units: 1  
unique values: 2 missing .: 51/4168  
unique mv codes: 4 missing .\*: 709/4168

| tabulation: | Freq. | Numeric | Label                      |
|-------------|-------|---------|----------------------------|
|             | 2980  | 0       | 0. No                      |
|             | 428   | 1       | 1. Yes                     |
|             | 51    | .       | .                          |
|             | 9     | .m      | .m. Missing                |
|             | 1     | .s      | .s. Skipped by participant |
|             | 699   | .x      | .x. No 6 week survey       |

-----  
w6\_802c 802: Health problems past month: Rapid weight loss  
-----

type: numeric (byte)  
label: w6\_yesno

range: [0,1] units: 1  
unique values: 2 missing .: 51/4168  
unique mv codes: 4 missing .\*: 709/4168

| tabulation: | Freq. | Numeric | Label                      |
|-------------|-------|---------|----------------------------|
|             | 3157  | 0       | 0. No                      |
|             | 251   | 1       | 1. Yes                     |
|             | 51    | .       | .                          |
|             | 9     | .m      | .m. Missing                |
|             | 1     | .s      | .s. Skipped by participant |
|             | 699   | .x      | .x. No 6 week survey       |

-----  
w6\_802d 802: Health problems past month: Recurring diarrhea  
-----

type: numeric (byte)  
label: w6\_yesno

range: [0,1] units: 1  
unique values: 2 missing .: 51/4168  
unique mv codes: 4 missing .\*: 709/4168

| tabulation: | Freq. | Numeric | Label                      |
|-------------|-------|---------|----------------------------|
|             | 2956  | 0       | 0. No                      |
|             | 452   | 1       | 1. Yes                     |
|             | 51    | .       | .                          |
|             | 9     | .m      | .m. Missing                |
|             | 1     | .s      | .s. Skipped by participant |
|             | 699   | .x      | .x. No 6 week survey       |

w6\_802e 802: Health problems past month: Recurring coughing or shortness of breath

-----  
type: numeric (byte)  
label: w6\_yesno  
range: [0,1] units: 1  
unique values: 2 missing .: 51/4168  
unique mv codes: 4 missing .\*: 709/4168

| tabulation: | Freq. | Numeric | Label                      |
|-------------|-------|---------|----------------------------|
|             | 2918  | 0       | 0. No                      |
|             | 490   | 1       | 1. Yes                     |
|             | 51    | .       | .                          |
|             | 9     | .m      | .m. Missing                |
|             | 1     | .s      | .s. Skipped by participant |
|             | 699   | .x      | .x. No 6 week survey       |

-----  
w6\_802f 802: Health problems past month: Recurring vomiting

-----  
type: numeric (byte)  
label: w6\_yesno  
range: [0,1] units: 1  
unique values: 2 missing .: 51/4168  
unique mv codes: 4 missing .\*: 709/4168

| tabulation: | Freq. | Numeric | Label                      |
|-------------|-------|---------|----------------------------|
|             | 3147  | 0       | 0. No                      |
|             | 261   | 1       | 1. Yes                     |
|             | 51    | .       | .                          |
|             | 9     | .m      | .m. Missing                |
|             | 1     | .s      | .s. Skipped by participant |
|             | 699   | .x      | .x. No 6 week survey       |

-----  
w6\_802g 802: Health problems past month: Recurring fatigue

-----  
type: numeric (byte)  
label: w6\_yesno  
range: [0,1] units: 1  
unique values: 2 missing .: 51/4168  
unique mv codes: 4 missing .\*: 709/4168

| tabulation: | Freq. | Numeric | Label                      |
|-------------|-------|---------|----------------------------|
|             | 3027  | 0       | 0. No                      |
|             | 381   | 1       | 1. Yes                     |
|             | 51    | .       | .                          |
|             | 9     | .m      | .m. Missing                |
|             | 1     | .s      | .s. Skipped by participant |
|             | 699   | .x      | .x. No 6 week survey       |

-----  
w6\_803 803: Covered by health insurance/scheme

-----  
type: numeric (byte)  
label: w6\_yesno  
range: [0,88] units: 1  
unique values: 3 missing .: 51/4168  
unique mv codes: 3 missing .\*: 707/4168

| tabulation: | Freq. | Numeric | Label  |
|-------------|-------|---------|--------|
|             | 3220  | 0       | 0. No  |
|             | 180   | 1       | 1. Yes |

```
10      88 88. Don't Know
51      .
8       .m .m. Missing
699    .x .x. No 6 week survey
```

w6\_804

804: Type of health insurance/scheme

```
-----
type: numeric (byte)
label: w6_804

range: [1,96]          units: 1
unique values: 7      missing .: 51/4168
unique mv codes: 4    missing .*: 3951/4168
```

```
tabulation: Freq.  Numeric  Label
             18         1  1. MUTUAL HEALTH/COMMUNITY-BASED
             84         2  2. EMPLOYER
              3         3  3. SOCIAL SECURITY
             14         4  4. OTHER PRIVATELY PURCHASED
                   COMMERCIAL
             26         5  5. LOW COST PRE-PAYMENT
             11         6  6. HIGH COST PRE-PAYMENT
             10        96 96. OTHER
             51         .
            3220        .a .a. No insurance
             32         .m .m. Missing
             699        .x .x. No 6 week survey
```

w6\_804a

804a: If other, specify type of health insurance

```
-----
type: string (str68)
unique values: 10      missing "": 4158/4168
```

```
tabulation: Freq.  Value
            4158  ""
              1  "AIRTEL INSURANCE"
              1  "AIRTEL INSURANCE COVER"
              1  "Chershiera Homes pays for the client"
              1  "CheshIre home society"
              1  "Heath insurance through husbands
                employer"
              1  "Insured through family members
                employer"
              1  "Managed fund"
              1  "Quick fit chipata"
              1  "UnKnown by participant as it is an
                extension of his mother's policy."
              1  "through my father who works for a
                hospital"
```

warning: variable has embedded blanks

w6\_805

805: FP: Currently doing something to avoid pregnancy

```
-----
type: numeric (byte)
label: w6_805

range: [0,1]          units: 1
unique values: 2      missing .: 51/4168
unique mv codes: 6    missing .*: 1056/4168
```

```
tabulation: Freq.  Numeric  Label
             1106         0  0. No
```



```

1955      1  1. Yes
  51      .
 215     .a .a. FP Client: see section 500
 102     .e .e. Programming skip error: Most
          males who answered 804 were
          skipped out of 805-807
   10     .m .m. Missing
   30     .s .s. Skipped by participant
  699     .x .x. No 6 week survey

```

w6\_805:

1. 12 cases made NO who originally reported YES to w6\_805, but said NO to all methods in w6\_807.

-----  
w6\_806

806: FP: Know place to get family planning  
-----

```

      type: numeric (byte)
      label: w6_806

      range: [0,1]                units: 1
      unique values: 2             missing .: 51/4168
      unique mv codes: 7           missing .*: 3005/4168

```

```

tabulation:  Freq.  Numeric  Label
              400    0      0. No
              712    1      1. Yes
              51     .
              215    .a     .a. FP Client: see section 500
              1955   .b     .b. Currently doing something to
                    avoid pregnancy: 805 = 1
              102    .e     .e. Programming skip error: Most
                    males who answered 804 were
                    skipped out of 805-807
              22     .m     .m. Missing
              12     .s     .s. Skipped by participant
              699    .x     .x. No 6 week survey

```

-----  
w6\_807a

807: FP: Method: Female sterilization  
-----

```

      type: numeric (byte)
      label: w6_807a

      range: [0,1]                units: 1
      unique values: 2             missing .: 51/4168
      unique mv codes: 7           missing .*: 2165/4168

```

```

tabulation:  Freq.  Numeric  Label
              1948   0      0. No
              4      1      1. Yes
              51     .
              215    .a     .a. FP Client: see section 500
              1106   .b     .b. Not using a method: 805 = 0
              102    .e     .e. Programming skip error: Most
                    males who answered 804 were
                    skipped out of 805-807
              31     .m     .m. Missing
              12     .s     .s. Skipped by participant
              699    .x     .x. No 6 week survey

```

-----  
w6\_807b

807: FP: Method: Male sterilization  
-----

```

      type: numeric (byte)
      label: w6_807b

```

```

range: [0,1] units: 1
unique values: 2 missing .: 51/4168
unique mv codes: 7 missing .*: 2165/4168

```

| tabulation: | Freq. | Numeric | Label                                                                               |
|-------------|-------|---------|-------------------------------------------------------------------------------------|
|             | 1949  | 0       | 0. No                                                                               |
|             | 3     | 1       | 1. Yes                                                                              |
|             | 51    | .       | .                                                                                   |
|             | 215   | .a      | .a. FP Client: see section 500                                                      |
|             | 1106  | .b      | .b. Not using a method: 805 = 0                                                     |
|             | 102   | .e      | .e. Programming skip error: Most males who answered 804 were skipped out of 805-807 |
|             | 31    | .m      | .m. Missing                                                                         |
|             | 12    | .s      | .s. Skipped by participant                                                          |
|             | 699   | .x      | .x. No 6 week survey                                                                |

-----  
w6\_807c

807: FP: Method: Pill  
-----

```

type: numeric (byte)
label: w6_807c

```

```

range: [0,1] units: 1
unique values: 2 missing .: 51/4168
unique mv codes: 7 missing .*: 2165/4168

```

| tabulation: | Freq. | Numeric | Label                                                                               |
|-------------|-------|---------|-------------------------------------------------------------------------------------|
|             | 1825  | 0       | 0. No                                                                               |
|             | 127   | 1       | 1. Yes                                                                              |
|             | 51    | .       | .                                                                                   |
|             | 215   | .a      | .a. FP Client: see section 500                                                      |
|             | 1106  | .b      | .b. Not using a method: 805 = 0                                                     |
|             | 102   | .e      | .e. Programming skip error: Most males who answered 804 were skipped out of 805-807 |
|             | 31    | .m      | .m. Missing                                                                         |
|             | 12    | .s      | .s. Skipped by participant                                                          |
|             | 699   | .x      | .x. No 6 week survey                                                                |

-----  
w6\_807d

807: FP: Method: IUD  
-----

```

type: numeric (byte)
label: w6_807d

```

```

range: [0,1] units: 1
unique values: 2 missing .: 51/4168
unique mv codes: 7 missing .*: 2165/4168

```

| tabulation: | Freq. | Numeric | Label                                                                               |
|-------------|-------|---------|-------------------------------------------------------------------------------------|
|             | 1811  | 0       | 0. No                                                                               |
|             | 141   | 1       | 1. Yes                                                                              |
|             | 51    | .       | .                                                                                   |
|             | 215   | .a      | .a. FP Client: see section 500                                                      |
|             | 1106  | .b      | .b. Not using a method: 805 = 0                                                     |
|             | 102   | .e      | .e. Programming skip error: Most males who answered 804 were skipped out of 805-807 |
|             | 31    | .m      | .m. Missing                                                                         |
|             | 12    | .s      | .s. Skipped by participant                                                          |
|             | 699   | .x      | .x. No 6 week survey                                                                |

-----  
w6\_807e

807: FP: Method: Injectables  
-----

```

type: numeric (byte)

```

label: w6\_807e

range: [0,1] units: 1  
 unique values: 2 missing .: 51/4168  
 unique mv codes: 7 missing .\*: 2165/4168

| tabulation: | Freq. | Numeric | Label                                                                               |
|-------------|-------|---------|-------------------------------------------------------------------------------------|
|             | 1761  | 0       | 0. No                                                                               |
|             | 191   | 1       | 1. Yes                                                                              |
|             | 51    | .       | .                                                                                   |
|             | 215   | .a      | .a. FP Client: see section 500                                                      |
|             | 1106  | .b      | .b. Not using a method: 805 = 0                                                     |
|             | 102   | .e      | .e. Programming skip error: Most males who answered 804 were skipped out of 805-807 |
|             | 31    | .m      | .m. Missing                                                                         |
|             | 12    | .s      | .s. Skipped by participant                                                          |
|             | 699   | .x      | .x. No 6 week survey                                                                |

-----  
 w6\_807f 807: FP: Method: Implants  
 -----

type: numeric (byte)  
 label: w6\_807f

range: [0,1] units: 1  
 unique values: 2 missing .: 51/4168  
 unique mv codes: 7 missing .\*: 2165/4168

| tabulation: | Freq. | Numeric | Label                                                                               |
|-------------|-------|---------|-------------------------------------------------------------------------------------|
|             | 1184  | 0       | 0. No                                                                               |
|             | 768   | 1       | 1. Yes                                                                              |
|             | 51    | .       | .                                                                                   |
|             | 215   | .a      | .a. FP Client: see section 500                                                      |
|             | 1106  | .b      | .b. Not using a method: 805 = 0                                                     |
|             | 102   | .e      | .e. Programming skip error: Most males who answered 804 were skipped out of 805-807 |
|             | 31    | .m      | .m. Missing                                                                         |
|             | 12    | .s      | .s. Skipped by participant                                                          |
|             | 699   | .x      | .x. No 6 week survey                                                                |

-----  
 w6\_807g 807: FP: Method: Male condom  
 -----

type: numeric (byte)  
 label: w6\_807g

range: [0,1] units: 1  
 unique values: 2 missing .: 51/4168  
 unique mv codes: 7 missing .\*: 2165/4168

| tabulation: | Freq. | Numeric | Label                                                                               |
|-------------|-------|---------|-------------------------------------------------------------------------------------|
|             | 1200  | 0       | 0. No                                                                               |
|             | 752   | 1       | 1. Yes                                                                              |
|             | 51    | .       | .                                                                                   |
|             | 215   | .a      | .a. FP Client: see section 500                                                      |
|             | 1106  | .b      | .b. Not using a method: 805 = 0                                                     |
|             | 102   | .e      | .e. Programming skip error: Most males who answered 804 were skipped out of 805-807 |
|             | 31    | .m      | .m. Missing                                                                         |
|             | 12    | .s      | .s. Skipped by participant                                                          |
|             | 699   | .x      | .x. No 6 week survey                                                                |

-----  
 w6\_807h 807: FP: Method: Female condom  
 -----

```

type: numeric (byte)
label: w6_807h

range: [0,1] units: 1
unique values: 2 missing .: 51/4168
unique mv codes: 7 missing .*: 2165/4168

```

```

tabulation: Freq. Numeric Label
            1925      0 0. No
              27      1 1. Yes
              51      .
            215      .a .a. FP Client: see section 500
            1106      .b .b. Not using a method: 805 = 0
              102      .e .e. Programming skip error: Most
                    males who answered 804 were
                    skipped out of 805-807
              31      .m .m. Missing
              12      .s .s. Skipped by participant
            699      .x .x. No 6 week survey

```

-----  
w6\_807i

807: FP: Method: Diaphragm  
-----

```

type: numeric (byte)
label: w6_807i

range: [0,1] units: 1
unique values: 2 missing .: 51/4168
unique mv codes: 7 missing .*: 2165/4168

```

```

tabulation: Freq. Numeric Label
            1948      0 0. No
              4      1 1. Yes
              51      .
            215      .a .a. FP Client: see section 500
            1106      .b .b. Not using a method: 805 = 0
              102      .e .e. Programming skip error: Most
                    males who answered 804 were
                    skipped out of 805-807
              31      .m .m. Missing
              12      .s .s. Skipped by participant
            699      .x .x. No 6 week survey

```

-----  
w6\_807j

807: FP: Method: Foam/Jelly  
-----

```

type: numeric (byte)
label: w6_807j

range: [0,1] units: 1
unique values: 2 missing .: 51/4168
unique mv codes: 7 missing .*: 2165/4168

```

```

tabulation: Freq. Numeric Label
            1950      0 0. No
              2      1 1. Yes
              51      .
            215      .a .a. FP Client: see section 500
            1106      .b .b. Not using a method: 805 = 0
              102      .e .e. Programming skip error: Most
                    males who answered 804 were
                    skipped out of 805-807
              31      .m .m. Missing
              12      .s .s. Skipped by participant
            699      .x .x. No 6 week survey

```

w6\_807k

807: FP: Method: Lactational amenorrhea method

```

type: numeric (byte)
label: w6_807k

range: [0,1]                units: 1
unique values: 2            missing .: 51/4168
unique mv codes: 7         missing .*: 2165/4168

```

```

tabulation: Freq.  Numeric  Label
            1948      0      0. No
              4        1      1. Yes
              51        .
            215       .a     .a. FP Client: see section 500
            1106      .b     .b. Not using a method: 805 = 0
            102       .e     .e. Programming skip error: Most
                               males who answered 804 were
                               skipped out of 805-807
              31       .m     .m. Missing
              12       .s     .s. Skipped by participant
            699       .x     .x. No 6 week survey

```

w6\_807l

807: FP: Method: Rhythm method

```

type: numeric (byte)
label: w6_807l

range: [0,1]                units: 1
unique values: 2            missing .: 51/4168
unique mv codes: 7         missing .*: 2165/4168

```

```

tabulation: Freq.  Numeric  Label
            1912      0      0. No
              40        1      1. Yes
              51        .
            215       .a     .a. FP Client: see section 500
            1106      .b     .b. Not using a method: 805 = 0
            102       .e     .e. Programming skip error: Most
                               males who answered 804 were
                               skipped out of 805-807
              31       .m     .m. Missing
              12       .s     .s. Skipped by participant
            699       .x     .x. No 6 week survey

```

w6\_807m

807: FP: Method: Withdrawal

```

type: numeric (byte)
label: w6_807m

range: [0,1]                units: 1
unique values: 2            missing .: 51/4168
unique mv codes: 7         missing .*: 2165/4168

```

```

tabulation: Freq.  Numeric  Label
            1912      0      0. No
              40        1      1. Yes
              51        .
            215       .a     .a. FP Client: see section 500
            1106      .b     .b. Not using a method: 805 = 0
            102       .e     .e. Programming skip error: Most
                               males who answered 804 were
                               skipped out of 805-807
              31       .m     .m. Missing
              12       .s     .s. Skipped by participant
            699       .x     .x. No 6 week survey

```

w6\_807n

807: FP: Method: Other method

type: numeric (byte)  
label: w6\_807n

range: [0,1] units: 1  
unique values: 2 missing .: 51/4168  
unique mv codes: 7 missing .\*: 2165/4168

| tabulation: | Freq. | Numeric | Label                                                                               |
|-------------|-------|---------|-------------------------------------------------------------------------------------|
|             | 1920  | 0       | 0. No                                                                               |
|             | 32    | 1       | 1. Yes                                                                              |
|             | 51    | .       | .                                                                                   |
|             | 215   | .a      | .a. FP Client: see section 500                                                      |
|             | 1106  | .b      | .b. Not using a method: 805 = 0                                                     |
|             | 102   | .e      | .e. Programming skip error: Most males who answered 804 were skipped out of 805-807 |
|             | 31    | .m      | .m. Missing                                                                         |
|             | 12    | .s      | .s. Skipped by participant                                                          |
|             | 699   | .x      | .x. No 6 week survey                                                                |

w6\_902

902: Last time had sexual intercourse

type: numeric (byte)  
label: w6\_902

range: [0,4] units: 1  
unique values: 5 missing .: 51/4168  
unique mv codes: 4 missing .\*: 731/4168

| tabulation: | Freq. | Numeric | Label                      |
|-------------|-------|---------|----------------------------|
|             | 467   | 0       | 0. Never had sex           |
|             | 1230  | 1       | 1. Today/Days ago          |
|             | 733   | 2       | 2. More than a week ago    |
|             | 737   | 3       | 3. More than a month ago   |
|             | 219   | 4       | 4. More than a year ago    |
|             | 51    | .       | .                          |
|             | 10    | .m      | .m. Missing                |
|             | 22    | .s      | .s. Skipped by participant |
|             | 699   | .x      | .x. No 6 week survey       |

w6\_903

903: Times had sex in last week

type: numeric (byte)  
label: w6\_903, but 12 nonmissing values are not labeled

range: [0,88] units: 1  
unique values: 12 missing .: 51/4168  
unique mv codes: 6 missing .\*: 2881/4168

| tabulation: | Freq. | Numeric | Label |
|-------------|-------|---------|-------|
|             | 12    | 0       |       |
|             | 332   | 1       |       |
|             | 335   | 2       |       |
|             | 241   | 3       |       |
|             | 95    | 4       |       |
|             | 28    | 5       |       |
|             | 29    | 6       |       |
|             | 22    | 7       |       |
|             | 17    | 8       |       |
|             | 6     | 9       |       |
|             | 2     | 10      |       |

```

117      88
51      .
467     .a .a. Never had sex
1689    .b .b. Sex >1 week ago
10      .m .m. Missing
16      .s .s. Skipped by participant
699     .x .x. No 6 week survey

```

w6\_904

904: Times used condom when had sex in last week

```

type: numeric (byte)
label: w6_904, but 11 nonmissing values are not labeled

```

```

range: [0,88]          units: 1
unique values: 11      missing .: 51/4168
unique mv codes: 6     missing .*: 2877/4168

```

```

tabulation: Freq.   Numeric   Label
471         0
234         1
209         2
94          3
36          4
18          5
18          6
3           7
8           8
1           9
148        88
51         .
467        .a .a. Never had sex
1689       .b .b. Sex >1 week ago
10         .m .m. Missing
12         .s .s. Skipped by participant
699        .x .x. No 6 week survey

```

w6\_905

905: Relationship to LAST person with whom had sexual intercourse

```

type: numeric (byte)
label: w6_905

```

```

range: [1,6]          units: 1
unique values: 6      missing .: 51/4168
unique mv codes: 6     missing .*: 1398/4168

```

```

tabulation: Freq.   Numeric   Label
1361        1 1. Husband/wife
360         2 2. Live-in partner
873         3 3. Girlfriend/boyfriend not
              living with you
53          4 4. Person you paid or who paid
              you for sex
49          5 5. Casual acquaintance
23          6 6. Other
51         .
467        .a .a. Never had sex
219        .b .b. Sex >1 year ago
10         .m .m. Missing
3          .s .s. Skipped by participant
699        .x .x. No 6 week survey

```

w6\_906

906: Condom used last time had sex

```

type: numeric (byte)

```

label: w6\_906

range: [0,88] units: 1  
 unique values: 3 missing .: 51/4168  
 unique mv codes: 6 missing .\*: 1398/4168

| tabulation: | Freq. | Numeric | Label                      |
|-------------|-------|---------|----------------------------|
|             | 1342  | 0       | 0. No                      |
|             | 1302  | 1       | 1. Yes                     |
|             | 75    | 88      | 88. Don't Know             |
|             | 51    | .       | .                          |
|             | 467   | .a      | .a. Never had sex          |
|             | 219   | .b      | .b. Sex >1 year ago        |
|             | 10    | .m      | .m. Missing                |
|             | 3     | .s      | .s. Skipped by participant |
|             | 699   | .x      | .x. No 6 week survey       |

-----  
 w6\_907 907: Use condom every time had sex with LAST person in last 12 months  
 -----

type: numeric (byte)  
 label: w6\_907

range: [0,88] units: 1  
 unique values: 3 missing .: 51/4168  
 unique mv codes: 6 missing .\*: 1401/4168

| tabulation: | Freq. | Numeric | Label                      |
|-------------|-------|---------|----------------------------|
|             | 1412  | 0       | 0. No                      |
|             | 1193  | 1       | 1. Yes                     |
|             | 111   | 88      | 88. Don't Know             |
|             | 51    | .       | .                          |
|             | 467   | .a      | .a. Never had sex          |
|             | 219   | .b      | .b. Sex >1 year ago        |
|             | 10    | .m      | .m. Missing                |
|             | 6     | .s      | .s. Skipped by participant |
|             | 699   | .x      | .x. No 6 week survey       |

-----  
 w6\_908 908: Having sex with other people during time having sex with LAST person  
 -----

type: numeric (byte)  
 label: w6\_908

range: [0,88] units: 1  
 unique values: 3 missing .: 51/4168  
 unique mv codes: 6 missing .\*: 1398/4168

| tabulation: | Freq. | Numeric | Label                      |
|-------------|-------|---------|----------------------------|
|             | 1672  | 0       | 0. No                      |
|             | 957   | 1       | 1. Yes                     |
|             | 90    | 88      | 88. Don't Know             |
|             | 51    | .       | .                          |
|             | 467   | .a      | .a. Never had sex          |
|             | 219   | .b      | .b. Sex >1 year ago        |
|             | 10    | .m      | .m. Missing                |
|             | 3     | .s      | .s. Skipped by participant |
|             | 699   | .x      | .x. No 6 week survey       |

-----  
 w6\_911 911: Number new sexual partners in last 6 weeks  
 -----

type: numeric (byte)  
 label: w6\_911, but 11 nonmissing values are not labeled

range: [0,10] units: 1  
 unique values: 11 missing .: 51/4168



unique mv codes: 7 missing .\*: 1422/4168

| tabulation: | Freq. | Numeric | Label                                      |
|-------------|-------|---------|--------------------------------------------|
|             | 1386  | 0       |                                            |
|             | 920   | 1       |                                            |
|             | 232   | 2       |                                            |
|             | 92    | 3       |                                            |
|             | 26    | 4       |                                            |
|             | 4     | 5       |                                            |
|             | 13    | 6       |                                            |
|             | 7     | 7       |                                            |
|             | 8     | 8       |                                            |
|             | 5     | 9       |                                            |
|             | 2     | 10      |                                            |
|             | 51    | .       |                                            |
|             | 467   | .a      | .a. Never had sex                          |
|             | 219   | .b      | .b. Sex >1 year ago                        |
|             | 10    | .m      | .m. Missing                                |
|             | 22    | .s      | .s. Skipped by participant                 |
|             | 5     | .w      | .w. Answered 6 mon survey at 6<br>wk visit |
|             | 699   | .x      | .x. No 6 week survey                       |

-----  
w6\_currpart\_an Analysis: Currently has spouse/primary sex partner  
-----

type: numeric (byte)  
label: w6\_yesno

range: [0,1] units: 1  
unique values: 2 missing .: 51/4168  
unique mv codes: 3 missing .\*: 703/4168

| tabulation: | Freq. | Numeric | Label                      |
|-------------|-------|---------|----------------------------|
|             | 563   | 0       | 0. No                      |
|             | 2851  | 1       | 1. Yes                     |
|             | 51    | .       |                            |
|             | 702   | .m      | .m. Missing                |
|             | 1     | .s      | .s. Skipped by participant |

-----  
m6\_time Time Point  
-----

type: numeric (byte)  
label: time

range: [1,2] units: 1  
unique values: 2 missing .: 67/4168  
unique mv codes: 2 missing .\*: 755/4168

| tabulation: | Freq. | Numeric | Label       |
|-------------|-------|---------|-------------|
|             | 2     | 1       | 1. 6 Weeks  |
|             | 3344  | 2       | 2. 6 Months |
|             | 67    | .       |             |
|             | 755   | .x      |             |

-----  
m6\_ID 6 Month Survey: Survey ID  
-----

type: numeric (int)  
label: admin\_m6, but 3132 nonmissing values are not labeled

range: [803,14899] units: 1  
unique values: 3132 missing .: 67/4168  
unique mv codes: 2 missing .\*: 755/4168

examples: 7315

10205  
11888  
14109

-----  
m6\_Date 6 Month Survey: Interviewer entered date, System timestamp  
-----

type: numeric (double)  
label: admin\_m6, but 3346 nonmissing values are not labeled

range: [1.699e+12,1.749e+12] units: 1000  
unique values: 3346 missing .: 67/4168  
unique mv codes: 2 missing .\*: 755/4168

examples: 1.729e+12  
1.734e+12  
1.739e+12  
1.748e+12

-----  
m6\_SurveyStatus 6 Month Survey: Survey Status  
-----

type: numeric (byte)  
label: SurveyStatus\_m6

range: [0,5] units: 1  
unique values: 6 missing .: 0/4168  
unique mv codes: 1 missing .\*: 787/4168

| tabulation: | Freq. | Numeric | Label                                      |
|-------------|-------|---------|--------------------------------------------|
|             | 9     | 0       | 0. Interrupted                             |
|             | 3331  | 1       | 1. Completed                               |
|             | 4     | 2       | 2. Completed on resumption                 |
|             | 2     | 3       | 3. Completed 6 wk survey at 6<br>mon visit |
|             | 28    | 4       | 4. Withdrew from study                     |
|             | 7     | 5       | 5. Deceased                                |
|             | 787   | .x      | .x. No 6 month survey                      |

-----  
m6\_AdminAge 6 Month Survey: Age entered by interviewer  
-----

type: numeric (byte)  
label: admin\_m6, but 31 nonmissing values are not labeled

range: [18,48] units: 1  
unique values: 31 missing .: 67/4168  
unique mv codes: 2 missing .\*: 755/4168

examples: 22  
25  
31  
48

m6\_AdminAge:  
1. Do not use this variable for analysis. Entered for administrative purposes. Should use  
bl\_102a.

-----  
m6\_SurveyGender 6 Month Survey: Administrative variable  
-----

type: string (str6)

unique values: 2 missing "": 821/4168

tabulation: Freq. Value

```
821 ""
1734 "Female"
1613 "Male"
```

m6\_SurveyGender:  
1. Survey gender does NOT always match true participant gender.

-----  
m6\_InterviewerID 6 Month Survey: Interviewer ID  
-----

```
type: numeric (int)
label: admin_m6, but 25 nonmissing values are not labeled

range: [100,241] units: 1
unique values: 25 missing .: 67/4168
unique mv codes: 2 missing .*: 755/4168
```

| tabulation: | Freq. | Numeric | Label                 |
|-------------|-------|---------|-----------------------|
|             | 64    | 100     |                       |
|             | 57    | 101     |                       |
|             | 168   | 102     |                       |
|             | 173   | 103     |                       |
|             | 104   | 104     |                       |
|             | 61    | 105     |                       |
|             | 232   | 106     |                       |
|             | 3     | 107     |                       |
|             | 74    | 108     |                       |
|             | 102   | 109     |                       |
|             | 1     | 111     |                       |
|             | 96    | 112     |                       |
|             | 36    | 113     |                       |
|             | 97    | 114     |                       |
|             | 208   | 115     |                       |
|             | 186   | 116     |                       |
|             | 211   | 117     |                       |
|             | 114   | 118     |                       |
|             | 164   | 119     |                       |
|             | 271   | 120     |                       |
|             | 226   | 210     |                       |
|             | 134   | 211     |                       |
|             | 333   | 222     |                       |
|             | 230   | 223     |                       |
|             | 1     | 241     |                       |
|             | 67    | .       |                       |
|             | 755   | .x      | .x. No 6 month survey |

-----  
m6\_GUID\_sys 6 Month Survey: Unique survey identifier  
-----

```
type: string (str36)

unique values: 3347 missing "": 821/4168

examples: "008e04e8-3455-4630-bded-3b8b7b333df4"
          "4076eee3-ffef-461d-bcd8-e9c78fd4c48e"
          "826d1f46-fc08-4b11-9ae4-993a3cd9fd6a"
          "c09e823c-a4ff-4189-a54d-32192f8ef6e3"
```

-----  
m6\_SiteID 6 Month Survey: Survey Site ID  
-----

```
type: numeric (byte)
label: m6_SiteID

range: [1,95] units: 1
unique values: 11 missing .: 67/4168
unique mv codes: 2 missing .*: 755/4168
```

| tabulation: | Freq. | Numeric | Label                                       |
|-------------|-------|---------|---------------------------------------------|
|             | 444   | 1       | 1. SFH HCT - Cairo Road                     |
|             | 365   | 2       | 2. Chawama Clinic - MCH                     |
|             | 200   | 3       | 3. Chawama Clinic - Out Patient Ward (VMMC) |
|             | 246   | 5       | 5. Kamwala Clinic - TB, STI & HIV Clinic    |
|             | 472   | 6       | 6. Kapata Urban Clinic, MCH                 |
|             | 647   | 7       | 7. Kapata Urban Clinic, TB, STI & HIV       |
|             | 164   | 8       | 8. Chipata Gen Hosp - OP VMMC               |
|             | 608   | 11      | 11. SFH New Start                           |
|             | 109   | 13      | 13. SFH VMMC                                |
|             | 40    | 94      | 94. YWCA HTC Site                           |
|             | 51    | 95      | 95. YWCA VMMC                               |
|             | 67    | .       | .                                           |
|             | 755   | .x      | .x. No 6 month survey                       |

m6\_SiteID:

1. 93, 94, & 95 are external evaluation sites

-----  
m6\_SiteName 6 Month Survey: Survey Site String  
-----

type: string (str40)

unique values: 13 missing "": 821/4168

| tabulation: | Freq. | Value                                      |
|-------------|-------|--------------------------------------------|
|             | 821   | " "                                        |
|             | 365   | "Chawama Clinic - Maternity Ward"          |
|             | 200   | "Chawama Clinic - Out Patient Ward (VMMC)" |
|             | 164   | "Chipata Gen Hosp - OP VMMC"               |
|             | 232   | "Kamwala Clinic - TB, STI & HIV Clinic"    |
|             | 14    | "Kamwala Clinic - TB, STI and HIV Clinic"  |
|             | 472   | "Kapata Urban Clinic, MCH"                 |
|             | 615   | "Kapata Urban Clinic, TB, STI & HIV"       |
|             | 33    | "Kapata Urban Clinic, TB, STI and HIV"     |
|             | 444   | "SFH HCT - Cairo Road"                     |
|             | 608   | "SFH New Start"                            |
|             | 109   | "SFH VMMC"                                 |
|             | 40    | "YWCA HTC Site"                            |
|             | 51    | "YWCA VMMC"                                |

warning: variable has embedded blanks

m6\_SiteName:

1. YWCA sites are external evaluation sites

-----  
m6\_SurveyType 6 Month Survey: Survey Type  
-----

type: numeric (byte)  
label: admin\_m6, but 2 nonmissing values are not labeled

range: [3,4] units: 1  
unique values: 2 missing .: 67/4168  
unique mv codes: 2 missing .\*: 755/4168

| tabulation: | Freq. | Numeric | Label                 |
|-------------|-------|---------|-----------------------|
|             | 2     | 3       |                       |
|             | 3344  | 4       |                       |
|             | 67    | .       | .                     |
|             | 755   | .x      | .x. No 6 month survey |

-----  
m6\_SurveyTypeName 6 Month Survey: Survey Type String  
-----

type: string (str21)  
unique values: 2 missing "": 821/4168  
tabulation: Freq. Value  
821 ""  
3345 "Reach 6 MONTHS - Both"  
2 "Reach 6 WEEKS - Both"  
warning: variable has embedded blanks

-----  
m6\_SurveyDuration\_sys Minutes for survey completion  
-----

type: numeric (long)  
label: admin\_m6, but 73 nonmissing values are not labeled  
range: [-717,142960] units: 1  
unique values: 73 missing .: 67/4168  
unique mv codes: 2 missing .\*: 755/4168  
examples: 6  
9  
13  
53

m6\_SurveyDuration\_sys:  
1. Large values may be due to completing survey on resumption (see SurveyStatus).

-----  
m6\_Weekday\_sys 6 Month Survey: Day of week  
-----

type: string (str3)  
unique values: 7 missing "": 821/4168  
tabulation: Freq. Value  
821 ""  
516 "Fri"  
821 "Mon"  
154 "Sat"  
37 "Sun"  
513 "Thu"  
720 "Tue"  
586 "Wed"

m6\_Weekday\_sys:  
1. Generated automatically based on m6\_Date

-----  
m6\_Day\_sys 6 Month Survey: Day of month  
-----

type: numeric (byte)  
label: admin\_m6, but 31 nonmissing values are not labeled  
range: [1,31] units: 1  
unique values: 31 missing .: 67/4168  
unique mv codes: 2 missing .\*: 755/4168  
examples: 7  
15  
23  
31

m6\_Day\_sys:

1. Generated automatically based on m6\_Date

m6\_Month\_sys

6 Month Survey: Day of month

```

type: numeric (byte)
label: admin_m6, but 12 nonmissing values are not labeled

range: [1,12]                units: 1
unique values: 12            missing .: 67/4168
unique mv codes: 2           missing .*: 755/4168

```

| tabulation: | Freq. | Numeric | Label                 |
|-------------|-------|---------|-----------------------|
|             | 291   | 1       |                       |
|             | 439   | 2       |                       |
|             | 265   | 3       |                       |
|             | 161   | 4       |                       |
|             | 141   | 5       |                       |
|             | 19    | 6       |                       |
|             | 64    | 7       |                       |
|             | 183   | 8       |                       |
|             | 403   | 9       |                       |
|             | 386   | 10      |                       |
|             | 465   | 11      |                       |
|             | 529   | 12      |                       |
|             | 67    | .       |                       |
|             | 755   | .x      | .x. No 6 month survey |

m6\_Month\_sys:

1. Generated automatically based on m6\_Date

m6\_DBVersion

DBVersion

```

type: numeric (double)
label: admin_m6, but 2 nonmissing values are not labeled

range: [2.5,2.6]            units: .1
unique values: 2            missing .: 67/4168
unique mv codes: 2           missing .*: 755/4168

```

| tabulation: | Freq. | Numeric | Label                 |
|-------------|-------|---------|-----------------------|
|             | 394   | 2.5     |                       |
|             | 2952  | 2.6     |                       |
|             | 67    | .       |                       |
|             | 755   | .x      | .x. No 6 month survey |

m6\_AppVersion

AppVersion

```

type: numeric (double)
label: admin_m6, but 2 nonmissing values are not labeled

range: [2.5,2.6]            units: .1
unique values: 2            missing .: 67/4168
unique mv codes: 2           missing .*: 755/4168

```

| tabulation: | Freq. | Numeric | Label                 |
|-------------|-------|---------|-----------------------|
|             | 394   | 2.5     |                       |
|             | 2952  | 2.6     |                       |
|             | 67    | .       |                       |
|             | 755   | .x      | .x. No 6 month survey |

m6\_100

100: Gender

```

-----
      type: numeric (byte)
      label: m6_100

      range: [0,1]                units: 1
      unique values: 2            missing .: 67/4168
      unique mv codes: 2          missing .*: 755/4168

      tabulation: Freq.  Numeric  Label
                  1613      0      0. Male
                  1733      1      1. Female
                   67       .
                  755      .x     .x. No 6 month survey

```

```

-----
m6_101                                     101: Married or living with someone
-----

```

```

      type: numeric (byte)
      label: m6_101

      range: [0,2]                units: 1
      unique values: 3            missing .: 67/4168
      unique mv codes: 3          missing .*: 758/4168

      tabulation: Freq.  Numeric  Label
                  1630      0      0. No
                  1671      1      1. Yes, married
                   42       2      2. Yes, living with partner
                   67       .
                   3        .m     .m. Missing
                  755      .x     .x. No 6 month survey

```

```

-----
m6_102                                     102: Primary sex partner
-----

```

```

      type: numeric (byte)
      label: m6_102

      range: [0,1]                units: 1
      unique values: 2            missing .: 67/4168
      unique mv codes: 4          missing .*: 2472/4168

      tabulation: Freq.  Numeric  Label
                  519       0      0. No
                  1110      1      1. Yes
                   67       .
                  1713      .a     .a. Married/Living with someone
                   4        .m     .m. Missing
                  755      .x     .x. No 6 month survey

```

```

-----
m6_103                                     103: Children 15 and older
-----

```

```

      type: numeric (byte)
      label: m6_yesno

      range: [0,1]                units: 1
      unique values: 2            missing .: 67/4168
      unique mv codes: 3          missing .*: 759/4168

      tabulation: Freq.  Numeric  Label
                  2909      0      0. No
                   433      1      1. Yes
                   67       .
                   4        .m     .m. Missing
                  755      .x     .x. No 6 month survey

```





unique mv codes: 4 missing .\*: 761/4168

| tabulation: | Freq. | Numeric | Label                                      |
|-------------|-------|---------|--------------------------------------------|
|             | 3197  | 0       | 0. No                                      |
|             | 143   | 1       | 1. Yes                                     |
|             | 67    | .       | .                                          |
|             | 4     | .m      | .m. Missing                                |
|             | 2     | .w      | .w. Answered 6 wk survey at 6<br>mon visit |
|             | 755   | .x      | .x. No 6 month survey                      |

-----  
m6\_105d\_f 105: Respondent: Family planning in last 6 months  
-----

type: numeric (byte)  
label: m6\_yesno

range: [0,1] units: 1  
unique values: 2 missing .: 67/4168  
unique mv codes: 5 missing .\*: 2376/4168

| tabulation: | Freq. | Numeric | Label                                      |
|-------------|-------|---------|--------------------------------------------|
|             | 1514  | 0       | 0. No                                      |
|             | 211   | 1       | 1. Yes                                     |
|             | 67    | .       | .                                          |
|             | 1615  | .g      | .g. Gender skip pattern                    |
|             | 4     | .m      | .m. Missing                                |
|             | 2     | .w      | .w. Answered 6 wk survey at 6<br>mon visit |
|             | 755   | .x      | .x. No 6 month survey                      |

-----  
m6\_105e\_f 105: Respondent: Cervical cancer screening  
-----

type: numeric (byte)  
label: m6\_yesno

range: [0,1] units: 1  
unique values: 2 missing .: 67/4168  
unique mv codes: 5 missing .\*: 2376/4168

| tabulation: | Freq. | Numeric | Label                                      |
|-------------|-------|---------|--------------------------------------------|
|             | 1416  | 0       | 0. No                                      |
|             | 309   | 1       | 1. Yes                                     |
|             | 67    | .       | .                                          |
|             | 1615  | .g      | .g. Gender skip pattern                    |
|             | 4     | .m      | .m. Missing                                |
|             | 2     | .w      | .w. Answered 6 wk survey at 6<br>mon visit |
|             | 755   | .x      | .x. No 6 month survey                      |

-----  
m6\_105f\_m 105: Respondent: Male circumcision in last 6 months  
-----

type: numeric (byte)  
label: m6\_yesno

range: [0,1] units: 1  
unique values: 2 missing .: 67/4168  
unique mv codes: 6 missing .\*: 2496/4168

| tabulation: | Freq. | Numeric | Label                   |
|-------------|-------|---------|-------------------------|
|             | 1314  | 0       | 0. No                   |
|             | 291   | 1       | 1. Yes                  |
|             | 67    | .       | .                       |
|             | 1729  | .g      | .g. Gender skip pattern |
|             | 9     | .m      | .m. Missing             |

```

1      .s  .s. Skipped by participant
2      .w  .w. Answered 6 wk survey at 6
        mon visit
755    .x  .x. No 6 month survey

```

-----  
m6\_106a 106: Partner: HIV testing/counseling in last 6 months  
-----

```

type: numeric (byte)
label: m6_106

range: [0,88]          units: 1
unique values: 3      missing .: 67/4168
unique mv codes: 5    missing .*: 1281/4168

```

```

tabulation: Freq.  Numeric  Label
1657        0  0. No
938         1  1. Yes
225        88  88. Don't Know
67          .
519        .a  .a. Married/Living with someone
5          .m  .m. Missing
2          .w  .w. Answered 6 wk survey at 6
        mon visit
755        .x  .x. No 6 month survey

```

-----  
m6\_106b 106: Partner: HIV care and treatment in last 6 months  
-----

```

type: numeric (byte)
label: m6_106

range: [0,88]          units: 1
unique values: 3      missing .: 67/4168
unique mv codes: 5    missing .*: 1281/4168

```

```

tabulation: Freq.  Numeric  Label
2445        0  0. No
207         1  1. Yes
168        88  88. Don't Know
67          .
519        .a  .a. Married/Living with someone
5          .m  .m. Missing
2          .w  .w. Answered 6 wk survey at 6
        mon visit
755        .x  .x. No 6 month survey

```

-----  
m6\_106c 106: Partner: STD care and treatment in last 6 months  
-----

```

type: numeric (byte)
label: m6_106

range: [0,88]          units: 1
unique values: 3      missing .: 67/4168
unique mv codes: 5    missing .*: 1281/4168

```

```

tabulation: Freq.  Numeric  Label
2575        0  0. No
103         1  1. Yes
142        88  88. Don't Know
67          .
519        .a  .a. Married/Living with someone
5          .m  .m. Missing
2          .w  .w. Answered 6 wk survey at 6
        mon visit
755        .x  .x. No 6 month survey

```

-----  
m6\_106d\_m 106: Partner: Family planning in last 6 months  
-----

type: numeric (byte)  
label: m6\_106  
  
range: [0,88] units: 1  
unique values: 3 missing .: 67/4168  
unique mv codes: 6 missing .\*: 2841/4168

| tabulation: | Freq. | Numeric | Label                                      |
|-------------|-------|---------|--------------------------------------------|
|             | 897   | 0       | 0. No                                      |
|             | 283   | 1       | 1. Yes                                     |
|             | 80    | 88      | 88. Don't Know                             |
|             | 67    | .       | .                                          |
|             | 347   | .a      | .a. Married/Living with someone            |
|             | 1729  | .g      | .g. Gender skip pattern                    |
|             | 8     | .m      | .m. Missing                                |
|             | 2     | .w      | .w. Answered 6 wk survey at 6<br>mon visit |
|             | 755   | .x      | .x. No 6 month survey                      |

-----  
m6\_106e\_m 106: Partner: Cervical cancer screening  
-----

type: numeric (byte)  
label: m6\_106  
  
range: [0,88] units: 1  
unique values: 3 missing .: 67/4168  
unique mv codes: 6 missing .\*: 2841/4168

| tabulation: | Freq. | Numeric | Label                                      |
|-------------|-------|---------|--------------------------------------------|
|             | 999   | 0       | 0. No                                      |
|             | 164   | 1       | 1. Yes                                     |
|             | 97    | 88      | 88. Don't Know                             |
|             | 67    | .       | .                                          |
|             | 347   | .a      | .a. Married/Living with someone            |
|             | 1729  | .g      | .g. Gender skip pattern                    |
|             | 8     | .m      | .m. Missing                                |
|             | 2     | .w      | .w. Answered 6 wk survey at 6<br>mon visit |
|             | 755   | .x      | .x. No 6 month survey                      |

-----  
m6\_106f\_f 106: Partner: Male circumcision in last 6 months  
-----

type: numeric (byte)  
label: m6\_106  
  
range: [0,88] units: 1  
unique values: 3 missing .: 67/4168  
unique mv codes: 6 missing .\*: 2548/4168

| tabulation: | Freq. | Numeric | Label                                      |
|-------------|-------|---------|--------------------------------------------|
|             | 1447  | 0       | 0. No                                      |
|             | 77    | 1       | 1. Yes                                     |
|             | 29    | 88      | 88. Don't Know                             |
|             | 67    | .       | .                                          |
|             | 172   | .a      | .a. Married/Living with someone            |
|             | 1615  | .g      | .g. Gender skip pattern                    |
|             | 4     | .m      | .m. Missing                                |
|             | 2     | .w      | .w. Answered 6 wk survey at 6<br>mon visit |
|             | 755   | .x      | .x. No 6 month survey                      |

-----  
m6\_107a 107: Children: HIV testing/counseling in last 6 months  
-----

type: numeric (byte)  
label: m6\_107  
  
range: [0,88] units: 1  
unique values: 3 missing .: 67/4168  
unique mv codes: 5 missing .\*: 3668/4168

| tabulation: | Freq. | Numeric | Label                                      |
|-------------|-------|---------|--------------------------------------------|
|             | 300   | 0       | 0. No                                      |
|             | 92    | 1       | 1. Yes                                     |
|             | 41    | 88      | 88. Don't Know                             |
|             | 67    | .       | .                                          |
|             | 2907  | .a      | .a. No children aged 15 or older           |
|             | 4     | .m      | .m. Missing                                |
|             | 2     | .w      | .w. Answered 6 wk survey at 6<br>mon visit |
|             | 755   | .x      | .x. No 6 month survey                      |

-----  
m6\_107b 107: Children: HIV care and treatment in last 6 months  
-----

type: numeric (byte)  
label: m6\_107  
  
range: [0,88] units: 1  
unique values: 3 missing .: 67/4168  
unique mv codes: 5 missing .\*: 3668/4168

| tabulation: | Freq. | Numeric | Label                                      |
|-------------|-------|---------|--------------------------------------------|
|             | 364   | 0       | 0. No                                      |
|             | 39    | 1       | 1. Yes                                     |
|             | 30    | 88      | 88. Don't Know                             |
|             | 67    | .       | .                                          |
|             | 2907  | .a      | .a. No children aged 15 or older           |
|             | 4     | .m      | .m. Missing                                |
|             | 2     | .w      | .w. Answered 6 wk survey at 6<br>mon visit |
|             | 755   | .x      | .x. No 6 month survey                      |

-----  
m6\_107c 107: Children: STD care and treatment in last 6 months  
-----

type: numeric (byte)  
label: m6\_107  
  
range: [0,88] units: 1  
unique values: 3 missing .: 67/4168  
unique mv codes: 5 missing .\*: 3668/4168

| tabulation: | Freq. | Numeric | Label                                      |
|-------------|-------|---------|--------------------------------------------|
|             | 393   | 0       | 0. No                                      |
|             | 9     | 1       | 1. Yes                                     |
|             | 31    | 88      | 88. Don't Know                             |
|             | 67    | .       | .                                          |
|             | 2907  | .a      | .a. No children aged 15 or older           |
|             | 4     | .m      | .m. Missing                                |
|             | 2     | .w      | .w. Answered 6 wk survey at 6<br>mon visit |
|             | 755   | .x      | .x. No 6 month survey                      |

-----  
m6\_107d 107: Children: Family planning in last 6 months  
-----

```

type: numeric (byte)
label: m6_107

range: [0,88] units: 1
unique values: 3 missing .: 67/4168
unique mv codes: 5 missing .*: 3668/4168

```

```

tabulation: Freq. Numeric Label
             385      0 0. No
              19      1 1. Yes
              29     88 88. Don't Know
              67      .
            2907     .a .a. No children aged 15 or older
               4     .m .m. Missing
               2     .w .w. Answered 6 wk survey at 6
                   mon visit
             755     .x .x. No 6 month survey

```

---

m6\_107e 107: Children: Cervical cancer screening

---

```

type: numeric (byte)
label: m6_107

range: [0,88] units: 1
unique values: 3 missing .: 67/4168
unique mv codes: 5 missing .*: 3668/4168

```

```

tabulation: Freq. Numeric Label
             379      0 0. No
              31      1 1. Yes
              23     88 88. Don't Know
              67      .
            2907     .a .a. No children aged 15 or older
               4     .m .m. Missing
               2     .w .w. Answered 6 wk survey at 6
                   mon visit
             755     .x .x. No 6 month survey

```

---

m6\_107f 107: Children: Male circumcision in last 6 months

---

```

type: numeric (byte)
label: m6_107

range: [0,88] units: 1
unique values: 3 missing .: 67/4168
unique mv codes: 5 missing .*: 3668/4168

```

```

tabulation: Freq. Numeric Label
             384      0 0. No
              30      1 1. Yes
              19     88 88. Don't Know
              67      .
            2907     .a .a. No children aged 15 or older
               4     .m .m. Missing
               2     .w .w. Answered 6 wk survey at 6
                   mon visit
             755     .x .x. No 6 month survey

```

---

m6\_200 200: HTC: Respondent understands to only include services from last 6 months

---

```

type: numeric (byte)
label: yesnoserv

range: [1,1] units: 1

```

unique values: 1 missing .: 67/4168  
unique mv codes: 6 missing .\*: 3061/4168

| tabulation: | Freq. | Numeric | Label                                      |
|-------------|-------|---------|--------------------------------------------|
|             | 1040  | 1       | 1. Yes                                     |
|             | 67    | .       | .                                          |
|             | 2299  | .a      | .a. Did not receive service                |
|             | 4     | .m      | .m. Missing                                |
|             | 1     | .s      | .s. Skipped by participant                 |
|             | 2     | .w      | .w. Answered 6 mon survey at 6<br>wk visit |
|             | 755   | .x      | .x. No 6 week survey                       |

-----  
m6\_201

201: HTC: Number times to health facility  
-----

type: numeric (byte)  
label: numserv, but 6 nonmissing values are not labeled

range: [1,6] units: 1  
unique values: 6 missing .: 67/4168  
unique mv codes: 6 missing .\*: 3065/4168

| tabulation: | Freq. | Numeric | Label                                      |
|-------------|-------|---------|--------------------------------------------|
|             | 635   | 1       |                                            |
|             | 280   | 2       |                                            |
|             | 80    | 3       |                                            |
|             | 23    | 4       |                                            |
|             | 8     | 5       |                                            |
|             | 10    | 6       |                                            |
|             | 67    | .       | .                                          |
|             | 2299  | .a      | .a. Did not receive service                |
|             | 4     | .m      | .m. Missing                                |
|             | 5     | .s      | .s. Skipped by participant                 |
|             | 2     | .w      | .w. Answered 6 mon survey at 6<br>wk visit |
|             | 755   | .x      | .x. No 6 week survey                       |

-----  
m6\_202

202: HTC: Health facility name  
-----

type: string (str41)

unique values: 379 missing "": 823/4168

examples: ". "  
". "  
". "  
"Chipata general Hospital"

warning: variable has embedded blanks

-----  
m6\_203

203: HTC: Alone or accompanied  
-----

type: numeric (byte)  
label: hfpeople

range: [1,3] units: 1  
unique values: 3 missing .: 67/4168  
unique mv codes: 6 missing .\*: 3064/4168

| tabulation: | Freq. | Numeric | Label             |
|-------------|-------|---------|-------------------|
|             | 647   | 1       | 1. Alone          |
|             | 299   | 2       | 2. Spouse/Partner |
|             | 91    | 3       | 3. Someone else   |
|             | 67    | .       | .                 |

```

2299 .a .a. Did not receive service
4 .m .m. Missing
4 .s .s. Skipped by participant
2 .w .w. Answered 6 mon survey at 6
wk visit
755 .x .x. No 6 week survey

```

m6\_204

204: HTC: Satisfied with services

```

type: numeric (byte)
label: hfsat

range: [1,3] units: 1
unique values: 3 missing .: 67/4168
unique mv codes: 6 missing .*: 3063/4168

```

```

tabulation: Freq. Numeric Label
32 1 1. Not satisfied
21 2 2. Neither
985 3 3. Satisfied
67 .
2299 .a .a. Did not receive service
4 .m .m. Missing
3 .s .s. Skipped by participant
2 .w .w. Answered 6 mon survey at 6
wk visit
755 .x .x. No 6 week survey

```

m6\_205

205: HTC: Waiting time at health facility (min)

```

type: numeric (int)
label: numserv, but 61 nonmissing values are not labeled

range: [1,2400] units: 1
unique values: 61 missing .: 67/4168
unique mv codes: 6 missing .*: 3066/4168

```

```

examples: 60
.a .a. Did not receive service
.a .a. Did not receive service
.a .a. Did not receive service

```

m6\_206

206: HTC: Travel time to health facility (min)

```

type: numeric (int)
label: hfttime, but 56 nonmissing values are not labeled

range: [1,300] units: 1
unique values: 56 missing .: 67/4168
unique mv codes: 6 missing .*: 3072/4168

```

```

examples: 60
.a .a. Did not receive service
.a .a. Did not receive service
.a .a. Did not receive service

```

m6\_207

207: HTC: Travel mode to health facility

```

type: numeric (byte)
label: hftmode

range: [1,7] units: 1

```

unique values: 7 missing .: 67/4168  
unique mv codes: 6 missing .\*: 3066/4168

| tabulation: | Freq. | Numeric | Label                                   |
|-------------|-------|---------|-----------------------------------------|
|             | 322   | 1       | 1. Bus                                  |
|             | 75    | 2       | 2. Taxi                                 |
|             | 34    | 3       | 3. Someone drove in private car         |
|             | 38    | 4       | 4. Drove self                           |
|             | 518   | 5       | 5. Walked                               |
|             | 40    | 6       | 6. Bicycle                              |
|             | 8     | 7       | 7. Other                                |
|             | 67    | .       | .                                       |
|             | 2299  | .a      | .a. Did not receive service             |
|             | 4     | .m      | .m. Missing                             |
|             | 6     | .s      | .s. Skipped by participant              |
|             | 2     | .w      | .w. Answered 6 mon survey at 6 wk visit |
|             | 755   | .x      | .x. No 6 week survey                    |

-----  
m6\_208

208: HTC: Transport cost  
-----

type: numeric (byte)  
label: hftcost, but 31 nonmissing values are not labeled

range: [0,100] units: 1  
unique values: 32 missing .: 67/4168  
unique mv codes: 7 missing .\*: 3661/4168

examples: .a .a. Did not receive service  
.a .a. Did not receive service  
.a .a. Did not receive service  
.b .b. Own car, walked, biked

-----  
m6\_209

209: HTC: Distance traveled (km)  
-----

type: numeric (int)  
label: hftkm, but 29 nonmissing values are not labeled

range: [0,888] units: 1  
unique values: 31 missing .: 67/4168  
unique mv codes: 6 missing .\*: 3153/4168

examples: 888 888. Don't Know  
.a .a. Did not receive service  
.a .a. Did not receive service  
.s .s. Skipped by participant

-----  
m6\_210

210: HTC: Source of transport money  
-----

type: numeric (byte)  
label: hftsource

range: [1,6] units: 1  
unique values: 6 missing .: 67/4168  
unique mv codes: 8 missing .\*: 3694/4168

| tabulation: | Freq. | Numeric | Label                             |
|-------------|-------|---------|-----------------------------------|
|             | 16    | 1       | 1. Cutting down on other expenses |
|             | 265   | 2       | 2. Savings                        |
|             | 5     | 3       | 3. Borrowing                      |
|             | 1     | 4       | 4. Selling assets                 |
|             | 99    | 5       | 5. Donation                       |
|             | 21    | 6       | 6. Other                          |



```

67      .
2299   .a  .a. Did not receive service
31     .b  .b. Did not pay for transport
596    .c  .c. Own car, walked, biked
4      .m  .m. Missing
7      .s  .s. Skipped by participant
2      .w  .w. Answered 6 mon survey at 6
        wk visit
755    .x  .x. No 6 week survey

```

-----  
m6\_211                    211: HTC: What respondent would be doing if not at health facility  
-----

```

type: numeric (byte)
label: hfnot

range: [1,6]                    units: 1
unique values: 6                missing .: 67/4168
unique mv codes: 6              missing .*: 3064/4168

```

```

tabulation: Freq.    Numeric    Label
            257      1    1. Paid employment
            160      2    2. Own business
            272      3    3. Unpaid work/Housework
             81      4    4. In school
            190      5    5. Resting/No specific activity
             77      6    6. Other
             67      .
            2299   .a  .a. Did not receive service
             4      .m  .m. Missing
             4      .s  .s. Skipped by participant
             2      .w  .w. Answered 6 mon survey at 6
                   wk visit
            755    .x  .x. No 6 week survey

```

-----  
m6\_300                    300: HIV Care/Trt: Respondent understands to only include services from last 6 m  
-----

```

type: numeric (byte)
label: yesnoserv

range: [1,1]                    units: 1
unique values: 1                missing .: 67/4168
unique mv codes: 6              missing .*: 3801/4168

```

```

tabulation: Freq.    Numeric    Label
            300      1    1. Yes
             67      .
            3039   .a  .a. Did not receive service
             4      .m  .m. Missing
             1      .s  .s. Skipped by participant
             2      .w  .w. Answered 6 mon survey at 6
                   wk visit
            755    .x  .x. No 6 week survey

```

-----  
m6\_301                    301: HIV Care/Trt: Number times to health facility  
-----

```

type: numeric (byte)
label: numserv, but 6 nonmissing values are not labeled

range: [1,6]                    units: 1
unique values: 6                missing .: 67/4168
unique mv codes: 6              missing .*: 3814/4168

```

```

tabulation: Freq.    Numeric    Label
            106      1

```

```

      86      2
      49      3
      19      4
      12      5
      15      6
      67      .
3039      .a  .a. Did not receive service
      4      .m  .m. Missing
      14      .s  .s. Skipped by participant
      2      .w  .w. Answered 6 mon survey at 6
                wk visit
      755      .x  .x. No 6 week survey

```

```
-----
m6_302                                     302: HIV Care/Trt: Health facility name
-----
```

```

      type: string (str33)
unique values: 102                missing "": 823/4168
examples:  ". "
           ". ."
           ". ."
           ". ."
warning: variable has embedded blanks

```

```
-----
m6_303                                     303: HIV Care/Trt: Alone or accompanied
-----
```

```

      type: numeric (byte)
      label: hfpeople
      range: [1,3]                units: 1
unique values: 3                missing .: 67/4168
unique mv codes: 6              missing .*: 3816/4168

      tabulation: Freq.  Numeric  Label
                  210      1      1. Alone
                  55      2      2. Spouse/Partner
                  20      3      3. Someone else
                  67      .
3039      .a  .a. Did not receive service
      4      .m  .m. Missing
      16      .s  .s. Skipped by participant
      2      .w  .w. Answered 6 mon survey at 6
                wk visit
      755      .x  .x. No 6 week survey

```

```
-----
m6_304                                     304: HIV Care/Trt: Satisfied with services
-----
```

```

      type: numeric (byte)
      label: hfsat
      range: [1,3]                units: 1
unique values: 3                missing .: 67/4168
unique mv codes: 6              missing .*: 3816/4168

      tabulation: Freq.  Numeric  Label
                  12      1      1. Not satisfied
                  9      2      2. Neither
                  264     3      3. Satisfied
                  67      .
3039      .a  .a. Did not receive service
      4      .m  .m. Missing
      16      .s  .s. Skipped by participant

```

2 .w .w. Answered 6 mon survey at 6  
wk visit  
755 .x .x. No 6 week survey

-----  
m6\_305 305: HIV Care/Trt: Waiting time at health facility (min)  
-----

type: numeric (int)  
label: numserv, but 46 nonmissing values are not labeled  
  
range: [1,840] units: 1  
unique values: 46 missing .: 67/4168  
unique mv codes: 6 missing .\*: 3818/4168  
  
examples: .a .a. Did not receive service  
.a .a. Did not receive service  
.a .a. Did not receive service  
.a .a. Did not receive service

-----  
m6\_306 306: HIV Care/Trt: TB testing  
-----

type: numeric (byte)  
label: yesnoserv  
  
range: [0,1] units: 1  
unique values: 2 missing .: 67/4168  
unique mv codes: 6 missing .\*: 3805/4168  
  
tabulation: Freq. Numeric Label  
215 0 0. No  
81 1 1. Yes  
67 .  
3039 .a .a. Did not receive service  
4 .m .m. Missing  
5 .s .s. Skipped by participant  
2 .w .w. Answered 6 mon survey at 6  
wk visit  
755 .x .x. No 6 week survey

-----  
m6\_307 307: HIV Care/Trt: CD4 testing  
-----

type: numeric (byte)  
label: yesnoserv  
  
range: [0,88] units: 1  
unique values: 3 missing .: 67/4168  
unique mv codes: 6 missing .\*: 3805/4168  
  
tabulation: Freq. Numeric Label  
89 0 0. No  
206 1 1. Yes  
1 88 88. Don't Know  
67 .  
3039 .a .a. Did not receive service  
4 .m .m. Missing  
5 .s .s. Skipped by participant  
2 .w .w. Answered 6 mon survey at 6  
wk visit  
755 .x .x. No 6 week survey

-----  
m6\_308 308: HIV Care/Trt: Eligible for ARV  
-----

type: numeric (byte)

label: m6\_308

range: [0,1] units: 1  
 unique values: 2 missing .: 67/4168  
 unique mv codes: 7 missing .\*: 3894/4168

| tabulation: | Freq. | Numeric | Label                                   |
|-------------|-------|---------|-----------------------------------------|
|             | 50    | 0       | 0. No                                   |
|             | 157   | 1       | 1. Yes                                  |
|             | 67    | .       | .                                       |
|             | 3039  | .a      | .a. Did not receive service             |
|             | 89    | .b      | .b. Have not received CD4 testing       |
|             | 4     | .m      | .m. Missing                             |
|             | 5     | .s      | .s. Skipped by participant              |
|             | 2     | .w      | .w. Answered 6 wk survey at 6 mon visit |
|             | 755   | .x      | .x. No 6 month survey                   |

-----  
 m6\_309 309: HIV Care/Trt: Initiated ARV  
 -----

type: numeric (byte)  
 label: m6\_309

range: [0,1] units: 1  
 unique values: 2 missing .: 67/4168  
 unique mv codes: 8 missing .\*: 3944/4168

| tabulation: | Freq. | Numeric | Label                                   |
|-------------|-------|---------|-----------------------------------------|
|             | 4     | 0       | 0. No                                   |
|             | 153   | 1       | 1. Yes                                  |
|             | 67    | .       | .                                       |
|             | 3039  | .a      | .a. Did not receive service             |
|             | 89    | .b      | .b. Have not received CD4 testing       |
|             | 50    | .c      | .c. Not eligible for ARV                |
|             | 4     | .m      | .m. Missing                             |
|             | 5     | .s      | .s. Skipped by participant              |
|             | 2     | .w      | .w. Answered 6 wk survey at 6 mon visit |
|             | 755   | .x      | .x. No 6 month survey                   |

-----  
 m6\_310 310: HIV Care/Trt: Number missed follow-ups since started ARV  
 -----

type: numeric (byte)  
 label: m6\_310, but 6 nonmissing values are not labeled

range: [0,6] units: 1  
 unique values: 7 missing .: 67/4168  
 unique mv codes: 9 missing .\*: 3948/4168

| tabulation: | Freq. | Numeric | Label                             |
|-------------|-------|---------|-----------------------------------|
|             | 131   | 0       | 0. Never                          |
|             | 10    | 1       |                                   |
|             | 5     | 2       |                                   |
|             | 3     | 3       |                                   |
|             | 2     | 4       |                                   |
|             | 1     | 5       |                                   |
|             | 1     | 6       |                                   |
|             | 67    | .       | .                                 |
|             | 3039  | .a      | .a. Did not receive service       |
|             | 89    | .b      | .b. Have not received CD4 testing |
|             | 50    | .c      | .c. Not eligible for ARV          |
|             | 4     | .d      | .d. Did not initiate ARV          |
|             | 4     | .m      | .m. Missing                       |

```

      5      .s .s. Skipped by participant
      2      .w .w. Answered 6 wk survey at 6
              mon visit
    755      .x .x. No 6 month survey

```

---

```

m6_311                                     311: HIV Care/Trt: Number missed doses ARV

```

---

```

      type: numeric (byte)
      label: m6_311, but 5 nonmissing values are not labeled

      range: [0,5]                               units: 1
      unique values: 6                           missing .: 67/4168
      unique mv codes: 9                         missing .*: 3948/4168

```

```

      tabulation: Freq.  Numeric  Label
                   125      0      0. Never
                   6        1
                   10       2
                   5        3
                   4        4
                   3        5
                   67       .
      3039         .a      .a. Did not receive service
                   89      .b      .b. Have not received CD4
                               testing
                   50      .c      .c. Not eligible for ARV
                   4       .d      .d. Did not initiate ARV
                   4       .m      .m. Missing
                   5       .s      .s. Skipped by participant
                   2       .w      .w. Answered 6 wk survey at 6
                               mon visit
                   755     .x      .x. No 6 month survey

```

---

```

m6_312                                     312: HIV Care/Trt: Participated in psycho-social support groups

```

---

```

      type: numeric (byte)
      label: yesnoserv

      range: [0,1]                               units: 1
      unique values: 2                           missing .: 67/4168
      unique mv codes: 6                         missing .*: 3806/4168

```

```

      tabulation: Freq.  Numeric  Label
                   252      0      0. No
                   43       1      1. Yes
                   67       .
      3039         .a      .a. Did not receive service
                   4       .m      .m. Missing
                   6       .s      .s. Skipped by participant
                   2       .w      .w. Answered 6 mon survey at 6
                               wk visit
                   755     .x      .x. No 6 week survey

```

---

```

m6_313                                     313: HIV Care/Trt: Travel time to health facility (min)

```

---

```

      type: numeric (int)
      label: hfttime, but 30 nonmissing values are not labeled

      range: [5,888]                             units: 1
      unique values: 31                           missing .: 67/4168
      unique mv codes: 6                         missing .*: 3820/4168

```

```

      examples: .a      .a. Did not receive service
                .a      .a. Did not receive service

```

.a .a. Did not receive service  
.a .a. Did not receive service

m6\_314

314: HIV Care/Trt: Travel mode to health facility

type: numeric (byte)  
label: hftmode  
range: [1,7] units: 1  
unique values: 7 missing .: 67/4168  
unique mv codes: 6 missing .\*: 3817/4168

| tabulation: | Freq. | Numeric | Label                                   |
|-------------|-------|---------|-----------------------------------------|
|             | 109   | 1       | 1. Bus                                  |
|             | 20    | 2       | 2. Taxi                                 |
|             | 4     | 3       | 3. Someone drove in private car         |
|             | 5     | 4       | 4. Drove self                           |
|             | 133   | 5       | 5. Walked                               |
|             | 12    | 6       | 6. Bicycle                              |
|             | 1     | 7       | 7. Other                                |
|             | 67    | .       | .                                       |
|             | 3039  | .a      | .a. Did not receive service             |
|             | 4     | .m      | .m. Missing                             |
|             | 17    | .s      | .s. Skipped by participant              |
|             | 2     | .w      | .w. Answered 6 mon survey at 6 wk visit |
|             | 755   | .x      | .x. No 6 week survey                    |

m6\_315

315: HIV Care/Trt: Transport cost

type: numeric (byte)  
label: hftcost, but 17 nonmissing values are not labeled  
range: [0,60] units: 1  
unique values: 18 missing .: 67/4168  
unique mv codes: 7 missing .\*: 3966/4168

| tabulation: | Freq. | Numeric | Label                                   |
|-------------|-------|---------|-----------------------------------------|
|             | 6     | 0       | 0. Nothing                              |
|             | 3     | 1       |                                         |
|             | 18    | 2       |                                         |
|             | 17    | 3       |                                         |
|             | 19    | 4       |                                         |
|             | 23    | 5       |                                         |
|             | 2     | 6       |                                         |
|             | 3     | 7       |                                         |
|             | 4     | 8       |                                         |
|             | 2     | 9       |                                         |
|             | 14    | 10      |                                         |
|             | 5     | 15      |                                         |
|             | 2     | 16      |                                         |
|             | 10    | 20      |                                         |
|             | 4     | 30      |                                         |
|             | 1     | 35      |                                         |
|             | 1     | 50      |                                         |
|             | 1     | 60      |                                         |
|             | 67    | .       | .                                       |
|             | 3039  | .a      | .a. Did not receive service             |
|             | 150   | .b      | .b. Own car, walked, biked              |
|             | 4     | .m      | .m. Missing                             |
|             | 16    | .s      | .s. Skipped by participant              |
|             | 2     | .w      | .w. Answered 6 mon survey at 6 wk visit |
|             | 755   | .x      | .x. No 6 week survey                    |

m6\_316

316: HIV Care/Trt: Distance traveled (km)

```

-----
type: numeric (int)
label: hftkm, but 17 nonmissing values are not labeled

range: [0,888]          units: 1
unique values: 19       missing .: 67/4168
unique mv codes: 6      missing .*: 3846/4168

```

```

tabulation: Freq.  Numeric  Label

```

| Freq. | Numeric | Label                                   |
|-------|---------|-----------------------------------------|
| 27    | 0       | 0. <1                                   |
| 9     | 1       |                                         |
| 20    | 2       |                                         |
| 18    | 3       |                                         |
| 13    | 4       |                                         |
| 9     | 5       |                                         |
| 8     | 6       |                                         |
| 4     | 7       |                                         |
| 5     | 8       |                                         |
| 3     | 9       |                                         |
| 3     | 10      |                                         |
| 1     | 12      |                                         |
| 1     | 15      |                                         |
| 1     | 25      |                                         |
| 1     | 40      |                                         |
| 2     | 45      |                                         |
| 1     | 90      |                                         |
| 1     | 100     |                                         |
| 128   | 888     | 888. Don't Know                         |
| 67    | .       | .                                       |
| 3039  | .a      | .a. Did not receive service             |
| 4     | .m      | .m. Missing                             |
| 46    | .s      | .s. Skipped by participant              |
| 2     | .w      | .w. Answered 6 mon survey at 6 wk visit |
| 755   | .x      | .x. No 6 week survey                    |

m6\_317

317: HIV Care/Trt: Source of transport money

```

-----
type: numeric (byte)
label: hftsource

range: [1,6]          units: 1
unique values: 5      missing .: 67/4168
unique mv codes: 8    missing .*: 3973/4168

```

```

tabulation: Freq.  Numeric  Label

```

| Freq. | Numeric | Label                                   |
|-------|---------|-----------------------------------------|
| 8     | 1       | 1. Cutting down on other expenses       |
| 66    | 2       | 2. Savings                              |
| 4     | 3       | 3. Borrowing                            |
| 40    | 5       | 5. Donation                             |
| 10    | 6       | 6. Other                                |
| 67    | .       | .                                       |
| 3039  | .a      | .a. Did not receive service             |
| 6     | .b      | .b. Did not pay for transport           |
| 150   | .c      | .c. Own car, walked, biked              |
| 4     | .m      | .m. Missing                             |
| 17    | .s      | .s. Skipped by participant              |
| 2     | .w      | .w. Answered 6 mon survey at 6 wk visit |
| 755   | .x      | .x. No 6 week survey                    |

m6\_318

318: HIV Care/Trt: What respondent would be doing if not at health facility

```

type: numeric (byte)
label: hfnot

range: [1,6] units: 1
unique values: 6 missing .: 67/4168
unique mv codes: 6 missing .*: 3818/4168

```

```

tabulation: Freq. Numeric Label
            49         1 1. Paid employment
            55         2 2. Own business
            99         3 3. Unpaid work/Housework
             4         4 4. In school
            53         5 5. Resting/No specific activity
            23         6 6. Other
            67         .
          3039       .a .a. Did not receive service
             4         .m .m. Missing
            18         .s .s. Skipped by participant
             2         .w .w. Answered 6 mon survey at 6
                    wk visit
            755       .x .x. No 6 week survey

```

-----  
m6\_400            400: STI Care/Trt: Respondent understands to only include services from last 6 m  
-----

```

type: numeric (byte)
label: yesnoserv

range: [1,1] units: 1
unique values: 1 missing .: 67/4168
unique mv codes: 5 missing .*: 3958/4168

```

```

tabulation: Freq. Numeric Label
            143         1 1. Yes
            67         .
          3197       .a .a. Did not receive service
             4         .m .m. Missing
             2         .w .w. Answered 6 mon survey at 6
                    wk visit
            755       .x .x. No 6 week survey

```

-----  
m6\_401            401: STI Care/Trt: Number times to health facility  
-----

```

type: numeric (byte)
label: numserv, but 6 nonmissing values are not labeled

range: [1,6] units: 1
unique values: 6 missing .: 67/4168
unique mv codes: 6 missing .*: 3963/4168

```

```

tabulation: Freq. Numeric Label
            80         1
            28         2
            21         3
             2         4
             2         5
             5         6
            67         .
          3197       .a .a. Did not receive service
             4         .m .m. Missing
             5         .s .s. Skipped by participant
             2         .w .w. Answered 6 mon survey at 6
                    wk visit
            755       .x .x. No 6 week survey

```

-----  
m6\_402            402: STI Care/Trt: Health facility name  
-----



```
-----
type: string (str57)
unique values: 86 missing "": 823/4168
examples: ". "
           ". "
           ". "
           ". "
warning: variable has embedded blanks
-----
```

```
-----
m6_403 403: STI Care/Trt: Alone or accompanied
-----
```

```
type: numeric (byte)
label: hfpeople
range: [1,3] units: 1
unique values: 3 missing .: 67/4168
unique mv codes: 6 missing .*: 3961/4168
```

```
tabulation: Freq. Numeric Label
             95         1 1. Alone
             32         2 2. Spouse/Partner
             13         3 3. Someone else
             67         .
            3197       .a .a. Did not receive service
             4         .m .m. Missing
             3         .s .s. Skipped by participant
             2         .w .w. Answered 6 mon survey at 6
                    wk visit
            755       .x .x. No 6 week survey
```

```
-----
m6_404 404: STI Care/Trt: Satisfied with services
-----
```

```
type: numeric (byte)
label: hfsat
range: [1,3] units: 1
unique values: 3 missing .: 67/4168
unique mv codes: 6 missing .*: 3961/4168
```

```
tabulation: Freq. Numeric Label
             7         1 1. Not satisfied
             2         2 2. Neither
            131         3 3. Satisfied
             67         .
            3197       .a .a. Did not receive service
             4         .m .m. Missing
             3         .s .s. Skipped by participant
             2         .w .w. Answered 6 mon survey at 6
                    wk visit
            755       .x .x. No 6 week survey
```

```
-----
m6_405 405: STI Care/Trt: Waiting time at health facility (min)
-----
```

```
type: numeric (int)
label: numserv, but 35 nonmissing values are not labeled
range: [1,360] units: 1
unique values: 35 missing .: 67/4168
unique mv codes: 6 missing .*: 3964/4168
```

```

examples: .a .a. Did not receive service
          .a .a. Did not receive service
          .a .a. Did not receive service
          .a .a. Did not receive service

```

m6\_406

406: STI Care/Trt: Need medicine for STD

```

type: numeric (byte)
label: yesnoserv

range: [0,1]          units: 1
unique values: 2      missing .: 67/4168
unique mv codes: 6    missing .*: 3962/4168

```

```

tabulation: Freq.  Numeric  Label
            77        0    0. No
            62        1    1. Yes
            67         .
           3197       .a   .a. Did not receive service
            4         .m   .m. Missing
            4         .s   .s. Skipped by participant
            2         .w   .w. Answered 6 mon survey at 6
                   wk visit
           755       .x   .x. No 6 week survey

```

m6\_407

407: STI Care/Trt: Place obtained medicine

```

type: numeric (byte)
label: m6_407

range: [1,3]          units: 1
unique values: 3      missing .: 67/4168
unique mv codes: 7    missing .*: 4039/4168

```

```

tabulation: Freq.  Numeric  Label
            53        1    1. At health facility
            7         2    2. Somewhere else
            2         3    3. Did not get medicine
            67         .
           3197       .a   .a. Did not receive service
            77        .b   .b. Did not need medicine
            4         .m   .m. Missing
            4         .s   .s. Skipped by participant
            2         .w   .w. Answered 6 wk survey at 6
                   mon visit
           755       .x   .x. No 6 month survey

```

m6\_408

408: STI Care/Trt: Cost of medicine

```

type: numeric (byte)
label: m6_408, but 9 nonmissing values are not labeled

range: [0,100]       units: 1
unique values: 10     missing .: 67/4168
unique mv codes: 8    missing .*: 4041/4168

```

```

tabulation: Freq.  Numeric  Label
            44        0    0. Nothing
            1         10
            1         11
            1         15
            3         20
            3         25
            1         30

```

```

      1      61
      1      85
      4     100
      67      .
3197     .a   .a. Did not receive service
      77     .b   .b. Did not need medicine
      2     .c   .c. Did not get medicine
      4     .m   .m. Missing
      4     .s   .s. Skipped by participant
      2     .w   .w. Answered 6 wk survey at 6
                mon visit
      755     .x   .x. No 6 month survey

```

m6\_409

409: STI Care/Trt: Travel time to health facility (min)

```

type: numeric (int)
label: hfttime, but 28 nonmissing values are not labeled

```

```

range: [1,888]          units: 1
unique values: 29      missing .: 67/4168
unique mv codes: 6     missing .*: 3965/4168

```

```

tabulation:  Freq.  Numeric  Label
              1      1
              1      4
              7      5
              1      9
             14     10
              2     13
              9     15
              1     16
              1     18
             13     20
              3     25
              1     28
             22     30
              2     35
              6     40
              1     44
              6     45
              4     50
              2     55
             19     60
              2     61
              1     65
              1     67
              2     70
              1     80
              5    120
              1    140
              1    240
              6    888  888. Don't Know
              67      .
3197     .a   .a. Did not receive service
              4     .m   .m. Missing
              7     .s   .s. Skipped by participant
              2     .w   .w. Answered 6 mon survey at 6
                wk visit
              755     .x   .x. No 6 week survey

```

m6\_410

410: STI Care/Trt: Travel mode to health facility

```

type: numeric (byte)
label: hftmode

```

```

range: [1,6]          units: 1

```



```

21      3
12      4
9       5
5       6
2       7
1       8
1       9
1      10
2      12
1      15
1      40
50     88
67     .
3197   .a .a. Did not receive service
4      .m .m. Missing
12     .s .s. Skipped by participant
2      .w .w. Answered 6 mon survey at 6
        wk visit
755    .x .x. No 6 week survey

```

-----  
m6\_413

413: STI Care/Trt: Source of transport money  
-----

```

type: numeric (byte)
label: hftsource

```

```

range: [1,6]          units: 1
unique values: 5      missing .: 67/4168
unique mv codes: 8    missing .*: 4045/4168

```

```

tabulation: Freq.  Numeric  Label
             1           1  1. Cutting down on other
                expenses
             40          2  2. Savings
              2           3  3. Borrowing
             11          5  5. Donation
              2           6  6. Other
             67          .
3197         .a .a. Did not receive service
              4         .b .b. Did not pay for transport
             79         .c .c. Own car, walked, biked
              4         .m .m. Missing
              4         .s .s. Skipped by participant
              2         .w .w. Answered 6 mon survey at 6
                wk visit
             755        .x .x. No 6 week survey

```

-----  
m6\_414

414: STI Care/Trt: What respondent would be doing if not at health facility  
-----

```

type: numeric (byte)
label: hfnot

```

```

range: [1,6]          units: 1
unique values: 6      missing .: 67/4168
unique mv codes: 6    missing .*: 3965/4168

```

```

tabulation: Freq.  Numeric  Label
             28          1  1. Paid employment
             25          2  2. Own business
             36          3  3. Unpaid work/Housework
              3          4  4. In school
             31          5  5. Resting/No specific activity
             13          6  6. Other
             67          .
3197         .a .a. Did not receive service
              4         .m .m. Missing
              7         .s .s. Skipped by participant

```

2 .w .w. Answered 6 mon survey at 6  
wk visit  
755 .x .x. No 6 week survey

-----  
m6\_500\_f 500: FP: Respondent understands to only include services from last 6 months  
-----

type: numeric (byte)  
label: yesnoserv  
range: [1,1] units: 1  
unique values: 1 missing .: 67/4168  
unique mv codes: 6 missing .\*: 3890/4168

| tabulation: | Freq. | Numeric | Label                                      |
|-------------|-------|---------|--------------------------------------------|
|             | 211   | 1       | 1. Yes                                     |
|             | 67    | .       | .                                          |
|             | 1514  | .a      | .a. Did not receive service                |
|             | 1615  | .g      | .g. Gender skip pattern                    |
|             | 4     | .m      | .m. Missing                                |
|             | 2     | .w      | .w. Answered 6 mon survey at 6<br>wk visit |
|             | 755   | .x      | .x. No 6 week survey                       |

-----  
m6\_501\_f 501: FP: Number times to health facility  
-----

type: numeric (byte)  
label: numserv, but 6 nonmissing values are not labeled  
range: [1,6] units: 1  
unique values: 6 missing .: 67/4168  
unique mv codes: 7 missing .\*: 3893/4168

| tabulation: | Freq. | Numeric | Label                                      |
|-------------|-------|---------|--------------------------------------------|
|             | 107   | 1       | 1                                          |
|             | 68    | 2       | 2                                          |
|             | 25    | 3       | 3                                          |
|             | 2     | 4       | 4                                          |
|             | 2     | 5       | 5                                          |
|             | 4     | 6       | 6                                          |
|             | 67    | .       | .                                          |
|             | 1514  | .a      | .a. Did not receive service                |
|             | 1615  | .g      | .g. Gender skip pattern                    |
|             | 4     | .m      | .m. Missing                                |
|             | 3     | .s      | .s. Skipped by participant                 |
|             | 2     | .w      | .w. Answered 6 mon survey at 6<br>wk visit |
|             | 755   | .x      | .x. No 6 week survey                       |

-----  
m6\_502\_f 502: FP: Health facility name  
-----

type: string (str33)  
unique values: 86 missing "": 823/4168  
examples: ". "  
". "  
". "  
". "  
warning: variable has embedded blanks

-----  
m6\_503\_f 503: FP: Alone or accompanied  
-----

```

type: numeric (byte)
label: hfpeople

range: [1,3] units: 1
unique values: 3 missing .: 67/4168
unique mv codes: 7 missing .*: 3893/4168

```

```

tabulation: Freq. Numeric Label
             181      1 1. Alone
              19      2 2. Spouse/Partner
               8      3 3. Someone else
              67      .
            1514     .a .a. Did not receive service
            1615     .g .g. Gender skip pattern
               4     .m .m. Missing
               3     .s .s. Skipped by participant
               2     .w .w. Answered 6 mon survey at 6
                   wk visit
            755     .x .x. No 6 week survey

```

-----  
m6\_504\_f 504: FP: Satisfied with services  
-----

```

type: numeric (byte)
label: hfsat

range: [1,3] units: 1
unique values: 3 missing .: 67/4168
unique mv codes: 7 missing .*: 3893/4168

```

```

tabulation: Freq. Numeric Label
             6      1 1. Not satisfied
             6      2 2. Neither
            196     3 3. Satisfied
             67      .
            1514     .a .a. Did not receive service
            1615     .g .g. Gender skip pattern
               4     .m .m. Missing
               3     .s .s. Skipped by participant
               2     .w .w. Answered 6 mon survey at 6
                   wk visit
            755     .x .x. No 6 week survey

```

-----  
m6\_505\_f 505: FP: Waiting time at health facility (min)  
-----

```

type: numeric (int)
label: numserv, but 34 nonmissing values are not labeled

range: [1,240] units: 1
unique values: 34 missing .: 67/4168
unique mv codes: 7 missing .*: 3898/4168

examples: .a .a. Did not receive service
          .a .a. Did not receive service
          .g .g. Gender skip pattern
          .g .g. Gender skip pattern

```

-----  
m6\_506\_f 506: FP: Currently pregnant  
-----

```

type: numeric (byte)
label: yesnoserv

range: [0,1] units: 1
unique values: 2 missing .: 67/4168

```

unique mv codes: 7 missing .\*: 3891/4168

| tabulation: | Freq. | Numeric | Label                                      |
|-------------|-------|---------|--------------------------------------------|
|             | 209   | 0       | 0. No                                      |
|             | 1     | 1       | 1. Yes                                     |
|             | 67    | .       | .                                          |
|             | 1514  | .a      | .a. Did not receive service                |
|             | 1615  | .g      | .g. Gender skip pattern                    |
|             | 4     | .m      | .m. Missing                                |
|             | 1     | .s      | .s. Skipped by participant                 |
|             | 2     | .w      | .w. Answered 6 mon survey at 6<br>wk visit |
|             | 755   | .x      | .x. No 6 week survey                       |

-----  
m6\_507\_f

507: FP: Currently using FP  
-----

type: numeric (byte)  
label: m6\_507

range: [0,1] units: 1  
unique values: 2 missing .: 67/4168  
unique mv codes: 8 missing .\*: 3892/4168

| tabulation: | Freq. | Numeric | Label                                      |
|-------------|-------|---------|--------------------------------------------|
|             | 9     | 0       | 0. No                                      |
|             | 200   | 1       | 1. Yes                                     |
|             | 67    | .       | .                                          |
|             | 1514  | .a      | .a. Did not receive service                |
|             | 1     | .b      | .b. Currently pregnant                     |
|             | 1615  | .g      | .g. Gender skip pattern                    |
|             | 4     | .m      | .m. Missing                                |
|             | 1     | .s      | .s. Skipped by participant                 |
|             | 2     | .w      | .w. Answered 6 wk survey at 6<br>mon visit |
|             | 755   | .x      | .x. No 6 month survey                      |

-----  
m6\_508a\_f

508: FP: Method: Female sterilization  
-----

type: numeric (byte)  
label: m6\_508a

range: [0,0] units: 1  
unique values: 1 missing .: 67/4168  
unique mv codes: 8 missing .\*: 3900/4168

| tabulation: | Freq. | Numeric | Label                                      |
|-------------|-------|---------|--------------------------------------------|
|             | 201   | 0       | 0. No                                      |
|             | 67    | .       | .                                          |
|             | 1514  | .a      | .a. Did not receive service                |
|             | 1     | .b      | .b. Currently pregnant                     |
|             | 9     | .c      | .c. Not using any method                   |
|             | 1615  | .g      | .g. Gender skip pattern                    |
|             | 4     | .m      | .m. Missing                                |
|             | 2     | .w      | .w. Answered 6 wk survey at 6<br>mon visit |
|             | 755   | .x      | .x. No 6 month survey                      |

-----  
m6\_508b\_f

508: FP: Method: Male sterilization  
-----

type: numeric (byte)  
label: m6\_508b

range: [0,0] units: 1  
unique values: 1 missing .: 67/4168



unique mv codes: 8 missing .\*: 3900/4168

| tabulation: | Freq. | Numeric | Label                                      |
|-------------|-------|---------|--------------------------------------------|
|             | 201   | 0       | 0. No                                      |
|             | 67    | .       | .                                          |
|             | 1514  | .a      | .a. Did not receive service                |
|             | 1     | .b      | .b. Currently pregnant                     |
|             | 9     | .c      | .c. Not using any method                   |
|             | 1615  | .g      | .g. Gender skip pattern                    |
|             | 4     | .m      | .m. Missing                                |
|             | 2     | .w      | .w. Answered 6 wk survey at 6<br>mon visit |
|             | 755   | .x      | .x. No 6 month survey                      |

-----  
m6\_508c\_f

508: FP: Method: Pill  
-----

type: numeric (byte)  
label: m6\_508c

range: [0,1] units: 1  
unique values: 2 missing .: 67/4168  
unique mv codes: 8 missing .\*: 3900/4168

| tabulation: | Freq. | Numeric | Label                                      |
|-------------|-------|---------|--------------------------------------------|
|             | 157   | 0       | 0. No                                      |
|             | 44    | 1       | 1. Yes                                     |
|             | 67    | .       | .                                          |
|             | 1514  | .a      | .a. Did not receive service                |
|             | 1     | .b      | .b. Currently pregnant                     |
|             | 9     | .c      | .c. Not using any method                   |
|             | 1615  | .g      | .g. Gender skip pattern                    |
|             | 4     | .m      | .m. Missing                                |
|             | 2     | .w      | .w. Answered 6 wk survey at 6<br>mon visit |
|             | 755   | .x      | .x. No 6 month survey                      |

-----  
m6\_508d\_f

508: FP: Method: IUD  
-----

type: numeric (byte)  
label: m6\_508d

range: [0,1] units: 1  
unique values: 2 missing .: 67/4168  
unique mv codes: 8 missing .\*: 3900/4168

| tabulation: | Freq. | Numeric | Label                                      |
|-------------|-------|---------|--------------------------------------------|
|             | 193   | 0       | 0. No                                      |
|             | 8     | 1       | 1. Yes                                     |
|             | 67    | .       | .                                          |
|             | 1514  | .a      | .a. Did not receive service                |
|             | 1     | .b      | .b. Currently pregnant                     |
|             | 9     | .c      | .c. Not using any method                   |
|             | 1615  | .g      | .g. Gender skip pattern                    |
|             | 4     | .m      | .m. Missing                                |
|             | 2     | .w      | .w. Answered 6 wk survey at 6<br>mon visit |
|             | 755   | .x      | .x. No 6 month survey                      |

-----  
m6\_508e\_f

508: FP: Method: Injectables  
-----

type: numeric (byte)  
label: m6\_508e

range: [0,1] units: 1

unique values: 2                   missing .: 67/4168  
unique mv codes: 8                 missing .\*: 3900/4168

| tabulation: | Freq. | Numeric | Label                                      |
|-------------|-------|---------|--------------------------------------------|
|             | 90    | 0       | 0. No                                      |
|             | 111   | 1       | 1. Yes                                     |
|             | 67    | .       | .                                          |
|             | 1514  | .a      | .a. Did not receive service                |
|             | 1     | .b      | .b. Currently pregnant                     |
|             | 9     | .c      | .c. Not using any method                   |
|             | 1615  | .g      | .g. Gender skip pattern                    |
|             | 4     | .m      | .m. Missing                                |
|             | 2     | .w      | .w. Answered 6 wk survey at 6<br>mon visit |
|             | 755   | .x      | .x. No 6 month survey                      |

-----  
m6\_508f\_f

508: FP: Method: Implants  
-----

type: numeric (byte)  
label: m6\_508f

range: [0,1]                                 units: 1  
unique values: 2                             missing .: 67/4168  
unique mv codes: 8                           missing .\*: 3900/4168

| tabulation: | Freq. | Numeric | Label                                      |
|-------------|-------|---------|--------------------------------------------|
|             | 174   | 0       | 0. No                                      |
|             | 27    | 1       | 1. Yes                                     |
|             | 67    | .       | .                                          |
|             | 1514  | .a      | .a. Did not receive service                |
|             | 1     | .b      | .b. Currently pregnant                     |
|             | 9     | .c      | .c. Not using any method                   |
|             | 1615  | .g      | .g. Gender skip pattern                    |
|             | 4     | .m      | .m. Missing                                |
|             | 2     | .w      | .w. Answered 6 wk survey at 6<br>mon visit |
|             | 755   | .x      | .x. No 6 month survey                      |

-----  
m6\_508g\_f

508: FP: Method: Male condom  
-----

type: numeric (byte)  
label: m6\_508g

range: [0,1]                                 units: 1  
unique values: 2                             missing .: 67/4168  
unique mv codes: 8                           missing .\*: 3900/4168

| tabulation: | Freq. | Numeric | Label                                      |
|-------------|-------|---------|--------------------------------------------|
|             | 182   | 0       | 0. No                                      |
|             | 19    | 1       | 1. Yes                                     |
|             | 67    | .       | .                                          |
|             | 1514  | .a      | .a. Did not receive service                |
|             | 1     | .b      | .b. Currently pregnant                     |
|             | 9     | .c      | .c. Not using any method                   |
|             | 1615  | .g      | .g. Gender skip pattern                    |
|             | 4     | .m      | .m. Missing                                |
|             | 2     | .w      | .w. Answered 6 wk survey at 6<br>mon visit |
|             | 755   | .x      | .x. No 6 month survey                      |

-----  
m6\_508h\_f

508: FP: Method: Female condom  
-----

type: numeric (byte)  
label: m6\_508h

range: [0,0] units: 1  
unique values: 1 missing .: 67/4168  
unique mv codes: 8 missing .\*: 3900/4168

| tabulation: | Freq. | Numeric | Label                                      |
|-------------|-------|---------|--------------------------------------------|
|             | 201   | 0       | 0. No                                      |
|             | 67    | .       | .                                          |
|             | 1514  | .a      | .a. Did not receive service                |
|             | 1     | .b      | .b. Currently pregnant                     |
|             | 9     | .c      | .c. Not using any method                   |
|             | 1615  | .g      | .g. Gender skip pattern                    |
|             | 4     | .m      | .m. Missing                                |
|             | 2     | .w      | .w. Answered 6 wk survey at 6<br>mon visit |
|             | 755   | .x      | .x. No 6 month survey                      |

-----  
m6\_508i\_f 508: FP: Method: Diaphragm  
-----

type: numeric (byte)  
label: m6\_508i

range: [0,0] units: 1  
unique values: 1 missing .: 67/4168  
unique mv codes: 8 missing .\*: 3900/4168

| tabulation: | Freq. | Numeric | Label                                      |
|-------------|-------|---------|--------------------------------------------|
|             | 201   | 0       | 0. No                                      |
|             | 67    | .       | .                                          |
|             | 1514  | .a      | .a. Did not receive service                |
|             | 1     | .b      | .b. Currently pregnant                     |
|             | 9     | .c      | .c. Not using any method                   |
|             | 1615  | .g      | .g. Gender skip pattern                    |
|             | 4     | .m      | .m. Missing                                |
|             | 2     | .w      | .w. Answered 6 wk survey at 6<br>mon visit |
|             | 755   | .x      | .x. No 6 month survey                      |

-----  
m6\_508j\_f 508: FP: Method: Foam/Jelly  
-----

type: numeric (byte)  
label: m6\_508j

range: [0,0] units: 1  
unique values: 1 missing .: 67/4168  
unique mv codes: 8 missing .\*: 3900/4168

| tabulation: | Freq. | Numeric | Label                                      |
|-------------|-------|---------|--------------------------------------------|
|             | 201   | 0       | 0. No                                      |
|             | 67    | .       | .                                          |
|             | 1514  | .a      | .a. Did not receive service                |
|             | 1     | .b      | .b. Currently pregnant                     |
|             | 9     | .c      | .c. Not using any method                   |
|             | 1615  | .g      | .g. Gender skip pattern                    |
|             | 4     | .m      | .m. Missing                                |
|             | 2     | .w      | .w. Answered 6 wk survey at 6<br>mon visit |
|             | 755   | .x      | .x. No 6 month survey                      |

-----  
m6\_508k\_f 508: FP: Method: Lactational amenorrhea method  
-----

type: numeric (byte)  
label: m6\_508k

range: [0,0] units: 1  
unique values: 1 missing .: 67/4168  
unique mv codes: 8 missing .\*: 3900/4168

| tabulation: | Freq. | Numeric | Label                                      |
|-------------|-------|---------|--------------------------------------------|
|             | 201   | 0       | 0. No                                      |
|             | 67    | .       | .                                          |
|             | 1514  | .a      | .a. Did not receive service                |
|             | 1     | .b      | .b. Currently pregnant                     |
|             | 9     | .c      | .c. Not using any method                   |
|             | 1615  | .g      | .g. Gender skip pattern                    |
|             | 4     | .m      | .m. Missing                                |
|             | 2     | .w      | .w. Answered 6 wk survey at 6<br>mon visit |
|             | 755   | .x      | .x. No 6 month survey                      |

-----  
m6\_508l\_f 508: FP: Method: Rhythm method  
-----

type: numeric (byte)  
label: m6\_508l

range: [0,0] units: 1  
unique values: 1 missing .: 67/4168  
unique mv codes: 8 missing .\*: 3900/4168

| tabulation: | Freq. | Numeric | Label                                      |
|-------------|-------|---------|--------------------------------------------|
|             | 201   | 0       | 0. No                                      |
|             | 67    | .       | .                                          |
|             | 1514  | .a      | .a. Did not receive service                |
|             | 1     | .b      | .b. Currently pregnant                     |
|             | 9     | .c      | .c. Not using any method                   |
|             | 1615  | .g      | .g. Gender skip pattern                    |
|             | 4     | .m      | .m. Missing                                |
|             | 2     | .w      | .w. Answered 6 wk survey at 6<br>mon visit |
|             | 755   | .x      | .x. No 6 month survey                      |

-----  
m6\_508m\_f 508: FP: Method: Withdrawal  
-----

type: numeric (byte)  
label: m6\_508m

range: [0,1] units: 1  
unique values: 2 missing .: 67/4168  
unique mv codes: 8 missing .\*: 3900/4168

| tabulation: | Freq. | Numeric | Label                                      |
|-------------|-------|---------|--------------------------------------------|
|             | 200   | 0       | 0. No                                      |
|             | 1     | 1       | 1. Yes                                     |
|             | 67    | .       | .                                          |
|             | 1514  | .a      | .a. Did not receive service                |
|             | 1     | .b      | .b. Currently pregnant                     |
|             | 9     | .c      | .c. Not using any method                   |
|             | 1615  | .g      | .g. Gender skip pattern                    |
|             | 4     | .m      | .m. Missing                                |
|             | 2     | .w      | .w. Answered 6 wk survey at 6<br>mon visit |
|             | 755   | .x      | .x. No 6 month survey                      |

-----  
m6\_508n\_f 508: FP: Method: Other method  
-----

type: numeric (byte)  
label: m6\_508n

range: [0,1] units: 1  
 unique values: 2 missing .: 67/4168  
 unique mv codes: 8 missing .\*: 3900/4168

| tabulation: | Freq. | Numeric | Label                                   |
|-------------|-------|---------|-----------------------------------------|
|             | 200   | 0       | 0. No                                   |
|             | 1     | 1       | 1. Yes                                  |
|             | 67    | .       | .                                       |
|             | 1514  | .a      | .a. Did not receive service             |
|             | 1     | .b      | .b. Currently pregnant                  |
|             | 9     | .c      | .c. Not using any method                |
|             | 1615  | .g      | .g. Gender skip pattern                 |
|             | 4     | .m      | .m. Missing                             |
|             | 2     | .w      | .w. Answered 6 wk survey at 6 mon visit |
|             | 755   | .x      | .x. No 6 month survey                   |

-----  
 m6\_509\_f

509: FP: Number days forgot pill in past month  
 -----

type: numeric (byte)  
 label: m6\_509, but 6 nonmissing values are not labeled

range: [0,6] units: 1  
 unique values: 7 missing .: 67/4168  
 unique mv codes: 9 missing .\*: 4057/4168

| tabulation: | Freq. | Numeric | Label                                   |
|-------------|-------|---------|-----------------------------------------|
|             | 26    | 0       | 0. Never                                |
|             | 4     | 1       | 1                                       |
|             | 10    | 2       | 2                                       |
|             | 1     | 3       | 3                                       |
|             | 1     | 4       | 4                                       |
|             | 1     | 5       | 5                                       |
|             | 1     | 6       | 6                                       |
|             | 67    | .       | .                                       |
|             | 1514  | .a      | .a. Did not receive service             |
|             | 1     | .b      | .b. Currently pregnant                  |
|             | 9     | .c      | .c. Not using any method                |
|             | 157   | .d      | .d. Not taking pill                     |
|             | 1615  | .g      | .g. Gender skip pattern                 |
|             | 4     | .m      | .m. Missing                             |
|             | 2     | .w      | .w. Answered 6 wk survey at 6 mon visit |
|             | 755   | .x      | .x. No 6 month survey                   |

-----  
 m6\_510\_f

510: FP: Number times had sex without condom  
 -----

type: numeric (byte)  
 label: m6\_510

range: [.,.] units: .  
 unique values: 0 missing .: 67/4168  
 unique mv codes: 10 missing .\*: 4101/4168

| tabulation: | Freq. | Numeric | Label                                                                                        |
|-------------|-------|---------|----------------------------------------------------------------------------------------------|
|             | 67    | .       | .                                                                                            |
|             | 1514  | .a      | .a. Did not receive service                                                                  |
|             | 1     | .b      | .b. Currently pregnant                                                                       |
|             | 9     | .c      | .c. Not using any method                                                                     |
|             | 182   | .d      | .d. Not currently using condoms                                                              |
|             | 19    | .e      | .e. Programming skip error: Had to say yes to male and female condom to answer this question |
|             | 1615  | .g      | .g. Gender skip pattern                                                                      |
|             | 4     | .m      | .m. Missing                                                                                  |
|             | 2     | .w      | .w. Answered 6 wk survey at 6                                                                |

755 mon visit  
.x .x. No 6 month survey

m6\_511\_f 511: FP: Travel time to health facility (min)

type: numeric (int)  
label: hfttime, but 28 nonmissing values are not labeled  
range: [0,888] units: 1  
unique values: 29 missing .: 67/4168  
unique mv codes: 7 missing .\*: 3895/4168

| tabulation: | Freq. | Numeric | Label                                      |
|-------------|-------|---------|--------------------------------------------|
|             | 1     | 0       |                                            |
|             | 1     | 3       |                                            |
|             | 1     | 4       |                                            |
|             | 9     | 5       |                                            |
|             | 1     | 6       |                                            |
|             | 2     | 7       |                                            |
|             | 1     | 8       |                                            |
|             | 23    | 10      |                                            |
|             | 17    | 15      |                                            |
|             | 1     | 16      |                                            |
|             | 1     | 19      |                                            |
|             | 29    | 20      |                                            |
|             | 1     | 21      |                                            |
|             | 4     | 25      |                                            |
|             | 1     | 27      |                                            |
|             | 47    | 30      |                                            |
|             | 1     | 34      |                                            |
|             | 2     | 35      |                                            |
|             | 12    | 40      |                                            |
|             | 2     | 43      |                                            |
|             | 14    | 45      |                                            |
|             | 1     | 50      |                                            |
|             | 1     | 59      |                                            |
|             | 19    | 60      |                                            |
|             | 1     | 70      |                                            |
|             | 3     | 90      |                                            |
|             | 1     | 120     |                                            |
|             | 2     | 180     |                                            |
|             | 7     | 888     | 888. Don't Know                            |
|             | 67    | .       | .                                          |
|             | 1514  | .a      | .a. Did not receive service                |
|             | 1615  | .g      | .g. Gender skip pattern                    |
|             | 4     | .m      | .m. Missing                                |
|             | 5     | .s      | .s. Skipped by participant                 |
|             | 2     | .w      | .w. Answered 6 mon survey at 6<br>wk visit |
|             | 755   | .x      | .x. No 6 week survey                       |

m6\_512\_f 512: FP: Travel mode to health facility

type: numeric (byte)  
label: hftmode  
range: [1,7] units: 1  
unique values: 7 missing .: 67/4168  
unique mv codes: 7 missing .\*: 3895/4168

| tabulation: | Freq. | Numeric | Label                           |
|-------------|-------|---------|---------------------------------|
|             | 51    | 1       | 1. Bus                          |
|             | 4     | 2       | 2. Taxi                         |
|             | 3     | 3       | 3. Someone drove in private car |
|             | 3     | 4       | 4. Drove self                   |
|             | 142   | 5       | 5. Walked                       |

```

      2      6 6. Bicycle
      1      7 7. Other
      67      .
1514      .a .a. Did not receive service
1615      .g .g. Gender skip pattern
      4      .m .m. Missing
      5      .s .s. Skipped by participant
      2      .w .w. Answered 6 mon survey at 6
           wk visit
      755      .x .x. No 6 week survey

```

-----  
m6\_513\_f

513: FP: Transport cost  
-----

```

      type: numeric (byte)
      label: hftcost, but 12 nonmissing values are not labeled

      range: [0,100]          units: 1
unique values: 13          missing .: 67/4168
unique mv codes: 8        missing .*: 4041/4168

```

```

tabulation:  Freq.  Numeric  Label
              3      0      0. Nothing
              11      2
              9       3
              6       4
              10      5
              3       6
              1       8
              1       9
              11      10
              1       15
              1       20
              1       50
              2      100
              67      .
1514      .a .a. Did not receive service
147       .b .b. Own car, walked, biked
1615      .g .g. Gender skip pattern
      4      .m .m. Missing
      4      .s .s. Skipped by participant
      2      .w .w. Answered 6 mon survey at 6
           wk visit
      755      .x .x. No 6 week survey

```

-----  
m6\_514\_f

514: FP: Distance traveled (km)  
-----

```

      type: numeric (int)
      label: hftkm, but 8 nonmissing values are not labeled

      range: [0,888]          units: 1
unique values: 10          missing .: 67/4168
unique mv codes: 7        missing .*: 3915/4168

```

```

tabulation:  Freq.  Numeric  Label
              28      0      0. <1
              10      1
              9       2
              21      3
              17      4
              13      5
              4       6
              3       7
              1      30
              80     888  888. Don't Know
              67      .
1514      .a .a. Did not receive service

```

```

1615 .g .g. Gender skip pattern
4 .m .m. Missing
25 .s .s. Skipped by participant
2 .w .w. Answered 6 mon survey at 6
wk visit
755 .x .x. No 6 week survey

```

m6\_515\_f

515: FP: Source of transport money

```

type: numeric (byte)
label: hftsource

range: [1,6] units: 1
unique values: 4 missing .: 67/4168
unique mv codes: 9 missing .*: 4046/4168

```

```

tabulation: Freq. Numeric Label
3 1 1. Cutting down on other
expenses
36 2 2. Savings
13 5 5. Donation
3 6 6. Other
67 .
1514 .a .a. Did not receive service
3 .b .b. Did not pay for transport
147 .c .c. Own car, walked, biked
1615 .g .g. Gender skip pattern
4 .m .m. Missing
6 .s .s. Skipped by participant
2 .w .w. Answered 6 mon survey at 6
wk visit
755 .x .x. No 6 week survey

```

m6\_516\_f

516: FP: What respondent would be doing if not at health facility

```

type: numeric (byte)
label: hfnot

range: [1,6] units: 1
unique values: 6 missing .: 67/4168
unique mv codes: 7 missing .*: 3895/4168

```

```

tabulation: Freq. Numeric Label
29 1 1. Paid employment
32 2 2. Own business
83 3 3. Unpaid work/Housework
8 4 4. In school
49 5 5. Resting/No specific activity
5 6 6. Other
67 .
1514 .a .a. Did not receive service
1615 .g .g. Gender skip pattern
4 .m .m. Missing
5 .s .s. Skipped by participant
2 .w .w. Answered 6 mon survey at 6
wk visit
755 .x .x. No 6 week survey

```

m6\_600\_f

600: CCS: Respondent understands to only include services from last 6 months

```

type: numeric (byte)
label: yesnoserv

range: [1,1] units: 1

```





```

1416 .a .a. Did not receive service
1615 .g .g. Gender skip pattern
4 .m .m. Missing
2 .s .s. Skipped by participant
2 .w .w. Answered 6 mon survey at 6
wk visit
755 .x .x. No 6 week survey

```

m6\_604\_f

604: CCS: Satisfied with services

```

type: numeric (byte)
label: hfsat

```

```

range: [1,3] units: 1
unique values: 3 missing .: 67/4168
unique mv codes: 7 missing .*: 3794/4168

```

```

tabulation: Freq. Numeric Label
4 1 1. Not satisfied
5 2 2. Neither
298 3 3. Satisfied
67 .
1416 .a .a. Did not receive service
1615 .g .g. Gender skip pattern
4 .m .m. Missing
2 .s .s. Skipped by participant
2 .w .w. Answered 6 mon survey at 6
wk visit
755 .x .x. No 6 week survey

```

m6\_605\_f

605: CCS: Waiting time at health facility (min)

```

type: numeric (int)
label: numserv, but 39 nonmissing values are not labeled

```

```

range: [2,740] units: 1
unique values: 39 missing .: 67/4168
unique mv codes: 7 missing .*: 3794/4168

```

```

examples: .a .a. Did not receive service
.a .a. Did not receive service
.g .g. Gender skip pattern
.g .g. Gender skip pattern

```

m6\_606\_f

606: CCS: Travel time to health facility (min)

```

type: numeric (int)
label: hfttime, but 31 nonmissing values are not labeled

```

```

range: [2,888] units: 1
unique values: 32 missing .: 67/4168
unique mv codes: 7 missing .*: 3795/4168

```

```

examples: .a .a. Did not receive service
.a .a. Did not receive service
.g .g. Gender skip pattern
.g .g. Gender skip pattern

```

m6\_607\_f

607: CCS: Travel mode to health facility

```

type: numeric (byte)
label: hftmode

```

```

range: [1,6] units: 1
unique values: 5 missing .: 67/4168
unique mv codes: 7 missing .*: 3795/4168

```

```

tabulation: Freq. Numeric Label
            104      1  1. Bus
             62      2  2. Taxi
              6      3  3. Someone drove in private car
            122      5  5. Walked
             12      6  6. Bicycle
             67      .
          1416     .a  .a. Did not receive service
          1615     .g  .g. Gender skip pattern
              4     .m  .m. Missing
              3     .s  .s. Skipped by participant
              2     .w  .w. Answered 6 mon survey at 6
                   wk visit
            755     .x  .x. No 6 week survey

```

-----  
m6\_608\_f

608: CCS: Transport cost  
-----

```

type: numeric (byte)
label: hftcost, but 17 nonmissing values are not labeled

```

```

range: [0,60] units: 1
unique values: 18 missing .: 67/4168
unique mv codes: 8 missing .*: 3928/4168

```

```

tabulation: Freq. Numeric Label
            39      0  0. Nothing
              6      1
            20      2
            18      3
            20      4
            20      5
              6      6
              1      8
            13     10
              6     15
            11     20
              2     25
              4     30
              1     32
              1     34
              2     40
              1     50
              2     60
             67      .
          1416     .a  .a. Did not receive service
           134     .b  .b. Own car, walked, biked
          1615     .g  .g. Gender skip pattern
              4     .m  .m. Missing
              2     .s  .s. Skipped by participant
              2     .w  .w. Answered 6 mon survey at 6
                   wk visit
            755     .x  .x. No 6 week survey

```

-----  
m6\_609\_f

609: CCS: Distance traveled (km)  
-----

```

type: numeric (int)
label: hftkm, but 8 nonmissing values are not labeled

```

```

range: [0,888] units: 1
unique values: 10 missing .: 67/4168
unique mv codes: 7 missing .*: 3832/4168

```

| tabulation: | Freq. | Numeric | Label                                      |
|-------------|-------|---------|--------------------------------------------|
|             | 19    | 0       | 0. <1                                      |
|             | 8     | 1       |                                            |
|             | 18    | 2       |                                            |
|             | 23    | 3       |                                            |
|             | 23    | 4       |                                            |
|             | 16    | 5       |                                            |
|             | 3     | 6       |                                            |
|             | 1     | 8       |                                            |
|             | 2     | 100     |                                            |
|             | 156   | 888     | 888. Don't Know                            |
|             | 67    | .       |                                            |
|             | 1416  | .a      | .a. Did not receive service                |
|             | 1615  | .g      | .g. Gender skip pattern                    |
|             | 4     | .m      | .m. Missing                                |
|             | 40    | .s      | .s. Skipped by participant                 |
|             | 2     | .w      | .w. Answered 6 mon survey at 6<br>wk visit |
|             | 755   | .x      | .x. No 6 week survey                       |

-----  
m6\_610\_f

610: CCS: Source of transport money  
-----

type: numeric (byte)  
label: hftsource

|                  |       |             |           |
|------------------|-------|-------------|-----------|
| range:           | [1,6] | units:      | 1         |
| unique values:   | 6     | missing .:  | 67/4168   |
| unique mv codes: | 9     | missing .*: | 3970/4168 |

| tabulation: | Freq. | Numeric | Label                                      |
|-------------|-------|---------|--------------------------------------------|
|             | 6     | 1       | 1. Cutting down on other<br>expenses       |
|             | 70    | 2       | 2. Savings                                 |
|             | 1     | 3       | 3. Borrowing                               |
|             | 2     | 4       | 4. Selling assets                          |
|             | 40    | 5       | 5. Donation                                |
|             | 12    | 6       | 6. Other                                   |
|             | 67    | .       |                                            |
|             | 1416  | .a      | .a. Did not receive service                |
|             | 39    | .b      | .b. Did not pay for transport              |
|             | 134   | .c      | .c. Own car, walked, biked                 |
|             | 1615  | .g      | .g. Gender skip pattern                    |
|             | 4     | .m      | .m. Missing                                |
|             | 5     | .s      | .s. Skipped by participant                 |
|             | 2     | .w      | .w. Answered 6 mon survey at 6<br>wk visit |
|             | 755   | .x      | .x. No 6 week survey                       |

-----  
m6\_611\_f

611: CCS: What respondent would be doing if not at health facility  
-----

type: numeric (byte)  
label: hfnot

|                  |       |             |           |
|------------------|-------|-------------|-----------|
| range:           | [1,6] | units:      | 1         |
| unique values:   | 6     | missing .:  | 67/4168   |
| unique mv codes: | 7     | missing .*: | 3794/4168 |

| tabulation: | Freq. | Numeric | Label                           |
|-------------|-------|---------|---------------------------------|
|             | 26    | 1       | 1. Paid employment              |
|             | 59    | 2       | 2. Own business                 |
|             | 157   | 3       | 3. Unpaid work/Housework        |
|             | 12    | 4       | 4. In school                    |
|             | 39    | 5       | 5. Resting/No specific activity |
|             | 14    | 6       | 6. Other                        |
|             | 67    | .       |                                 |

```

1416 .a .a. Did not receive service
1615 .g .g. Gender skip pattern
4 .m .m. Missing
2 .s .s. Skipped by participant
2 .w .w. Answered 6 mon survey at 6
wk visit
755 .x .x. No 6 week survey

```

-----  
m6\_700\_m 700: VMMC: Respondent understands to only include services from last 6 months  
-----

```

type: numeric (byte)
label: yesnoserv

range: [1,1] units: 1
unique values: 1 missing .: 67/4168
unique mv codes: 7 missing .*: 3810/4168

```

```

tabulation: Freq. Numeric Label
291 1 1. Yes
67 .
1314 .a .a. Did not receive service
1729 .g .g. Gender skip pattern
9 .m .m. Missing
1 .s .s. Skipped by participant
2 .w .w. Answered 6 mon survey at 6
wk visit
755 .x .x. No 6 week survey

```

-----  
m6\_701\_m 701: VMMC: Number times to health facility  
-----

```

type: numeric (byte)
label: numserv, but 6 nonmissing values are not labeled

range: [1,6] units: 1
unique values: 6 missing .: 67/4168
unique mv codes: 7 missing .*: 3814/4168

```

```

tabulation: Freq. Numeric Label
146 1
43 2
70 3
21 4
5 5
2 6
67 .
1314 .a .a. Did not receive service
1729 .g .g. Gender skip pattern
9 .m .m. Missing
5 .s .s. Skipped by participant
2 .w .w. Answered 6 mon survey at 6
wk visit
755 .x .x. No 6 week survey

```

-----  
m6\_702\_m 702: VMMC: Health facility name  
-----

```

type: string (str31)

unique values: 59 missing "": 823/4168

examples: "."
          ". "
          ". ."
          ". ."
          ". ."

```

warning: variable has embedded blanks

m6\_703\_m 703: VMMC: Alone or accompanied

type: numeric (byte)  
label: hfpeople  
range: [1,3] units: 1  
unique values: 3 missing .: 67/4168  
unique mv codes: 7 missing .\*: 3828/4168

| tabulation: | Freq. | Numeric | Label                                      |
|-------------|-------|---------|--------------------------------------------|
|             | 209   | 1       | 1. Alone                                   |
|             | 21    | 2       | 2. Spouse/Partner                          |
|             | 43    | 3       | 3. Someone else                            |
|             | 67    | .       | .                                          |
|             | 1314  | .a      | .a. Did not receive service                |
|             | 1729  | .g      | .g. Gender skip pattern                    |
|             | 9     | .m      | .m. Missing                                |
|             | 19    | .s      | .s. Skipped by participant                 |
|             | 2     | .w      | .w. Answered 6 mon survey at 6<br>wk visit |
|             | 755   | .x      | .x. No 6 week survey                       |

m6\_704\_m 704: VMMC: Satisfied with services

type: numeric (byte)  
label: hfsat  
range: [1,3] units: 1  
unique values: 3 missing .: 67/4168  
unique mv codes: 7 missing .\*: 3827/4168

| tabulation: | Freq. | Numeric | Label                                      |
|-------------|-------|---------|--------------------------------------------|
|             | 4     | 1       | 1. Not satisfied                           |
|             | 7     | 2       | 2. Neither                                 |
|             | 263   | 3       | 3. Satisfied                               |
|             | 67    | .       | .                                          |
|             | 1314  | .a      | .a. Did not receive service                |
|             | 1729  | .g      | .g. Gender skip pattern                    |
|             | 9     | .m      | .m. Missing                                |
|             | 18    | .s      | .s. Skipped by participant                 |
|             | 2     | .w      | .w. Answered 6 mon survey at 6<br>wk visit |
|             | 755   | .x      | .x. No 6 week survey                       |

m6\_705\_m 705: VMMC: Waiting time at health facility (min)

type: numeric (int)  
label: numserv, but 32 nonmissing values are not labeled  
range: [1,420] units: 1  
unique values: 32 missing .: 67/4168  
unique mv codes: 7 missing .\*: 3832/4168

examples: .a .a. Did not receive service  
.g .g. Gender skip pattern  
.g .g. Gender skip pattern  
.g .g. Gender skip pattern

m6\_706\_m 706: VMMC: Weeks since circumcision

```

type: numeric (byte)
label: m6_706

range: [3,7] units: 1
unique values: 5 missing .: 67/4168
unique mv codes: 7 missing .*: 3821/4168

```

```

tabulation: Freq. Numeric Label
             1         3 3. 3 weeks ago
             4         4 4. 4 weeks ago
             2         5 5. 5 weeks ago
             5         6 6. 6 weeks ago
            268        7 7. More than 6 weeks ago
             67         .
            1314       .a .a. Did not receive service
            1729       .g .g. Gender skip pattern
             9         .m .m. Missing
             12        .s .s. Skipped by participant
             2         .w .w. Answered 6 wk survey at 6
                    mon visit
            755        .x .x. No 6 month survey

```

```
-----
m6_707_m                                707: VMMC: Resumed sexual activity since circumcision
-----
```

```

type: numeric (byte)
label: m6_707

range: [0,1] units: 1
unique values: 2 missing .: 67/4168
unique mv codes: 7 missing .*: 3812/4168

```

```

tabulation: Freq. Numeric Label
             85         0 0. No
            204         1 1. Yes
             67         .
            1314       .a .a. Did not receive service
            1729       .g .g. Gender skip pattern
             9         .m .m. Missing
             3         .s .s. Skipped by participant
             2         .w .w. Answered 6 wk survey at 6
                    mon visit
            755        .x .x. No 6 month survey

```

```
-----
m6_708_m                                708: VMMC: Weeks after circumcision resumed sexual activity
-----
```

```

type: numeric (byte)
label: m6_708

range: [0,7] units: 1
unique values: 7 missing .: 67/4168
unique mv codes: 8 missing .*: 3899/4168

```

```

tabulation: Freq. Numeric Label
             1         0 0. <1 week
             2         2 2. 2 weeks
             4         3 3. 3 weeks
            11         4 4. 4 weeks
             7         5 5. 5 weeks
            39         6 6. 6 weeks
            138        7 7. More than 6 weeks ago
             67         .
            1314       .a .a. Did not receive service
             85        .c .c. Have not resumed sexual
                    activity
            1729       .g .g. Gender skip pattern
             9         .m .m. Missing

```

```

5      .s .s. Skipped by participant
2      .w .w. Answered 6 wk survey at 6
        mon visit
755    .x .x. No 6 month survey

```

```
-----
m6_709_m                                709: VMMC: Travel time to health facility (min)
-----
```

```

type: numeric (int)
label: hfttime, but 27 nonmissing values are not labeled

range: [2,180]                units: 1
unique values: 27             missing .: 67/4168
unique mv codes: 7           missing .*: 3834/4168

```

```

tabulation: Freq.  Numeric  Label
            2          2
            1          3
            7          5
            2          8
           17         10
            1         14
           24         15
            1         17
            2         18
            1         19
           19         20
           11         25
           54         30
            1         31
            1         33
            4         35
           14         40
           20         45
            6         50
           50         60
            2         70
            1         80
           11         90
            9        120
            1        130
            3        140
            2        180
           67         .
          1314        .a .a. Did not receive service
          1729        .g .g. Gender skip pattern
            9         .m .m. Missing
           25         .s .s. Skipped by participant
            2         .w .w. Answered 6 mon survey at 6
                wk visit
           755        .x .x. No 6 week survey

```

```
-----
m6_710_m                                710: VMMC: Travel mode to health facility
-----
```

```

type: numeric (byte)
label: hftmode

range: [1,7]                units: 1
unique values: 7             missing .: 67/4168
unique mv codes: 7           missing .*: 3832/4168

```

```

tabulation: Freq.  Numeric  Label
            76         1  1. Bus
            24         2  2. Taxi
             4         3  3. Someone drove in private car
             9         4  4. Drove self
           137         5  5. Walked

```



```

18      6 6. Bicycle
1       7 7. Other
67      .
1314   .a .a. Did not receive service
1729   .g .g. Gender skip pattern
9       .m .m. Missing
23     .s .s. Skipped by participant
2       .w .w. Answered 6 mon survey at 6
        wk visit
755    .x .x. No 6 week survey

```

m6\_711\_m

711: VMMC: Transport cost

```

type: numeric (byte)
label: hftcost, but 17 nonmissing values are not labeled

```

```

range: [0,100]          units: 1
unique values: 18      missing .: 67/4168
unique mv codes: 8     missing .*: 3993/4168

```

```

tabulation: Freq.  Numeric  Label
            17      0      0. Nothing
            2       1
            9       2
            15      3
            8       4
            26      5
            2       6
            1       7
            12     10
            1      12
            4      15
            5      20
            1      25
            1      30
            1      31
            1      40
            1      45
            1     100
            67      .
1314   .a .a. Did not receive service
164    .b .b. Own car, walked, biked
1729   .g .g. Gender skip pattern
9       .m .m. Missing
20     .s .s. Skipped by participant
2       .w .w. Answered 6 mon survey at 6
        wk visit
755    .x .x. No 6 week survey

```

m6\_712\_m

712: VMMC: Distance traveled (km)

```

type: numeric (int)
label: hftkm, but 16 nonmissing values are not labeled

```

```

range: [0,888]          units: 1
unique values: 18      missing .: 67/4168
unique mv codes: 7     missing .*: 3835/4168

```

```

tabulation: Freq.  Numeric  Label
            20      0      0. <1
            11      1
            48      2
            42      3
            32      4
            17      5
            10      6

```

```

7          7
6          8
2          9
5         10
1         12
1         13
5         15
1         20
2         35
1         40
55        888 888. Don't Know
67        .
1314     .a  .a. Did not receive service
1729     .g  .g. Gender skip pattern
9         .m  .m. Missing
26       .s  .s. Skipped by participant
2        .w  .w. Answered 6 mon survey at 6
          wk visit
755     .x  .x. No 6 week survey

```

-----  
m6\_713\_m

713: VMMC: Source of transport money  
-----

```

type: numeric (byte)
label: hftsource

```

```

range: [1,6]          units: 1
unique values: 5      missing .: 67/4168
unique mv codes: 9    missing .*: 4011/4168

```

```

tabulation: Freq.  Numeric  Label
           22      1      1. Cutting down on other
                    expenses
           39      2      2. Savings
           4       3      3. Borrowing
           23      5      5. Donation
           2       6      6. Other
           67      .
1314     .a  .a. Did not receive service
17       .b  .b. Did not pay for transport
164     .c  .c. Own car, walked, biked
1729     .g  .g. Gender skip pattern
9        .m  .m. Missing
21       .s  .s. Skipped by participant
2        .w  .w. Answered 6 mon survey at 6
          wk visit
755     .x  .x. No 6 week survey

```

-----  
m6\_714\_m

714: VMMC: What respondent would be doing if not at health facility  
-----

```

type: numeric (byte)
label: hfnot

```

```

range: [1,6]          units: 1
unique values: 6      missing .: 67/4168
unique mv codes: 7    missing .*: 3833/4168

```

```

tabulation: Freq.  Numeric  Label
           87      1      1. Paid employment
           42      2      2. Own business
           19      3      3. Unpaid work/Housework
           59      4      4. In school
           51      5      5. Resting/No specific activity
           10      6      6. Other
           67      .
1314     .a  .a. Did not receive service
1729     .g  .g. Gender skip pattern

```

```

          9      .m  .m. Missing
         24      .s  .s. Skipped by participant
          2      .w  .w. Answered 6 mon survey at 6
                   wk visit
        755      .x  .x. No 6 week survey

```

```
-----
m6_800                800: Self-rated health in past YEAR: 1 (very bad) - 10 (very good)
-----
```

```

      type: numeric (byte)
      label: m6_num, but 10 nonmissing values are not labeled

      range: [1,10]                units: 1
  unique values: 10                missing .: 67/4168
  unique mv codes: 3                missing .*: 760/4168

```

```

  tabulation: Freq.  Numeric  Label
              15         1
              10         2
              11         3
             268         4
             117         5
             106         6
             849         7
             474         8
             528         9
             963        10
              67         .
              5         .m  .m. Missing
             755        .x  .x. No 6 month survey

```

```
-----
m6_801                801: Self-rated health in past MONTH: 1 (very bad) - 10 (very good)
-----
```

```

      type: numeric (byte)
      label: m6_num, but 10 nonmissing values are not labeled

      range: [1,10]                units: 1
  unique values: 10                missing .: 67/4168
  unique mv codes: 3                missing .*: 760/4168

```

```

  tabulation: Freq.  Numeric  Label
              13         1
               7         2
               7         3
             185         4
              93         5
             116         6
             724         7
             416         8
             524         9
            1256        10
              67         .
              5         .m  .m. Missing
             755        .x  .x. No 6 month survey

```

```
-----
m6_802a                802: Health problems past month: Fever
-----
```

```

      type: numeric (byte)
      label: m6_yesno

      range: [0,1]                units: 1
  unique values: 2                missing .: 67/4168
  unique mv codes: 4                missing .*: 762/4168

```

```

  tabulation: Freq.  Numeric  Label

```

```
2755      0  0. No
584       1  1. Yes
67        .
5         .m .m. Missing
2         .s .s. Skipped by participant
755      .x .x. No 6 month survey
```

-----  
m6\_802b

802: Health problems past month: Night sweat  
-----

```
type: numeric (byte)
label: m6_yesno

range: [0,1]          units: 1
unique values: 2      missing .: 67/4168
unique mv codes: 4    missing .*: 762/4168
```

```
tabulation: Freq.  Numeric  Label
2950        0  0. No
389         1  1. Yes
67          .
5           .m .m. Missing
2           .s .s. Skipped by participant
755        .x .x. No 6 month survey
```

-----  
m6\_802c

802: Health problems past month: Rapid weight loss  
-----

```
type: numeric (byte)
label: m6_yesno

range: [0,1]          units: 1
unique values: 2      missing .: 67/4168
unique mv codes: 4    missing .*: 762/4168
```

```
tabulation: Freq.  Numeric  Label
3077        0  0. No
262         1  1. Yes
67          .
5           .m .m. Missing
2           .s .s. Skipped by participant
755        .x .x. No 6 month survey
```

-----  
m6\_802d

802: Health problems past month: Recurring diarrhea  
-----

```
type: numeric (byte)
label: m6_yesno

range: [0,1]          units: 1
unique values: 2      missing .: 67/4168
unique mv codes: 4    missing .*: 762/4168
```

```
tabulation: Freq.  Numeric  Label
2868        0  0. No
471         1  1. Yes
67          .
5           .m .m. Missing
2           .s .s. Skipped by participant
755        .x .x. No 6 month survey
```

-----  
m6\_802e

802: Health problems past month: Recurring coughing or shortness of breath  
-----

```
type: numeric (byte)
label: m6_yesno
```

range: [0,1] units: 1  
unique values: 2 missing .: 67/4168  
unique mv codes: 4 missing .\*: 762/4168

| tabulation: | Freq. | Numeric | Label                      |
|-------------|-------|---------|----------------------------|
|             | 2860  | 0       | 0. No                      |
|             | 479   | 1       | 1. Yes                     |
|             | 67    | .       | .                          |
|             | 5     | .m      | .m. Missing                |
|             | 2     | .s      | .s. Skipped by participant |
|             | 755   | .x      | .x. No 6 month survey      |

-----  
m6\_802f 802: Health problems past month: Recurring vomiting  
-----

type: numeric (byte)  
label: m6\_yesno

range: [0,1] units: 1  
unique values: 2 missing .: 67/4168  
unique mv codes: 4 missing .\*: 762/4168

| tabulation: | Freq. | Numeric | Label                      |
|-------------|-------|---------|----------------------------|
|             | 3089  | 0       | 0. No                      |
|             | 250   | 1       | 1. Yes                     |
|             | 67    | .       | .                          |
|             | 5     | .m      | .m. Missing                |
|             | 2     | .s      | .s. Skipped by participant |
|             | 755   | .x      | .x. No 6 month survey      |

-----  
m6\_802g 802: Health problems past month: Recurring fatigue  
-----

type: numeric (byte)  
label: m6\_yesno

range: [0,1] units: 1  
unique values: 2 missing .: 67/4168  
unique mv codes: 4 missing .\*: 762/4168

| tabulation: | Freq. | Numeric | Label                      |
|-------------|-------|---------|----------------------------|
|             | 2958  | 0       | 0. No                      |
|             | 381   | 1       | 1. Yes                     |
|             | 67    | .       | .                          |
|             | 5     | .m      | .m. Missing                |
|             | 2     | .s      | .s. Skipped by participant |
|             | 755   | .x      | .x. No 6 month survey      |

-----  
m6\_803 803: Covered by health insurance/scheme  
-----

type: numeric (byte)  
label: m6\_yesno

range: [0,88] units: 1  
unique values: 3 missing .: 67/4168  
unique mv codes: 3 missing .\*: 760/4168

| tabulation: | Freq. | Numeric | Label                 |
|-------------|-------|---------|-----------------------|
|             | 3148  | 0       | 0. No                 |
|             | 191   | 1       | 1. Yes                |
|             | 2     | 88      | 88. Don't Know        |
|             | 67    | .       | .                     |
|             | 5     | .m      | .m. Missing           |
|             | 755   | .x      | .x. No 6 month survey |

m6\_804

804: Type of health insurance/scheme

```

type: numeric (byte)
label: m6_804

range: [1,96]          units: 1
unique values: 7       missing .: 67/4168
unique mv codes: 4     missing .*: 3910/4168

```

```

tabulation: Freq.  Numeric  Label
              31         1  1. MUTUAL HEALTH/COMMUNITY-BASED
              103        2  2. EMPLOYER
               4         3  3. SOCIAL SECURITY
               21         4  4. OTHER PRIVATELY PURCHASED
                   COMMERCIAL
               8         5  5. LOW COST PRE-PAYMENT
               12         6  6. HIGH COST PRE-PAYMENT
               12        96  96. OTHER
               67         .
            3148        .a  .a. No insurance
               7         .m  .m. Missing
               755        .x  .x. No 6 month survey

```

m6\_804a

804a: If other, specify type of health insurance

```

type: string (str60)

unique values: 11          missing "": 4156/4168

```

```

tabulation: Freq.  Value
              4156  ""
               1  "African life"
               1  "Eastern water and sewerage"
               1  "Health care"
               1  "M life insurance"
               1  "Medical scheme through husband"
               2  "Metropolitan"
               1  "Napsa"
               1  "Participant unsure as it is extension
                   of his mother's policy"
               1  "Through Husbands Work place"
               1  "Uncertain? as he is covered under
                   mother's work scheme."
               1  "ppt unsure but related to work"

```

warning: variable has embedded blanks

m6\_805

805: FP: Currently doing something to avoid pregnancy

```

type: numeric (byte)
label: m6_805

range: [0,1]          units: 1
unique values: 2       missing .: 67/4168
unique mv codes: 6     missing .*: 1085/4168

```

```

tabulation: Freq.  Numeric  Label
              985         0  0. No
            2031         1  1. Yes
               67         .
               214        .a  .a. FP Client: see section 500
               110        .e  .e. Programming skip error: Most
                   males who answered 804 were
                   skipped out of 805-807

```

```

5      .m  .m. Missing
1      .s  .s. Skipped by participant
755    .x  .x. No 6 month survey

```

m6\_805:

1. 10 cases made NO who originally reported YES to m6\_805, but said NO to all methods in m6\_807.

m6\_806

806: FP: Know place to get family planning

```

type: numeric (byte)
label: m6_806

range: [0,1]          units: 1
unique values: 2      missing .: 67/4168
unique mv codes: 7    missing .*: 3126/4168

```

| tabulation: | Freq. | Numeric | Label                                                                               |
|-------------|-------|---------|-------------------------------------------------------------------------------------|
|             | 328   | 0       | 0. No                                                                               |
|             | 647   | 1       | 1. Yes                                                                              |
|             | 67    | .       | .                                                                                   |
|             | 214   | .a      | .a. FP Client: see section 500                                                      |
|             | 2031  | .b      | .b. Currently doing something to avoid pregnancy: 805 = 1                           |
|             | 110   | .e      | .e. Programming skip error: Most males who answered 804 were skipped out of 805-807 |
|             | 15    | .m      | .m. Missing                                                                         |
|             | 1     | .s      | .s. Skipped by participant                                                          |
|             | 755   | .x      | .x. No 6 month survey                                                               |

m6\_807a

807: FP: Method: Female sterilization

```

type: numeric (byte)
label: m6_807a

range: [0,1]          units: 1
unique values: 2      missing .: 67/4168
unique mv codes: 7    missing .*: 2071/4168

```

| tabulation: | Freq. | Numeric | Label                                                                               |
|-------------|-------|---------|-------------------------------------------------------------------------------------|
|             | 2027  | 0       | 0. No                                                                               |
|             | 3     | 1       | 1. Yes                                                                              |
|             | 67    | .       | .                                                                                   |
|             | 214   | .a      | .a. FP Client: see section 500                                                      |
|             | 985   | .b      | .b. Not using a method: 805 = 0                                                     |
|             | 110   | .e      | .e. Programming skip error: Most males who answered 804 were skipped out of 805-807 |
|             | 5     | .m      | .m. Missing                                                                         |
|             | 2     | .s      | .s. Skipped by participant                                                          |
|             | 755   | .x      | .x. No 6 month survey                                                               |

m6\_807b

807: FP: Method: Male sterilization

```

type: numeric (byte)
label: m6_807b

range: [0,1]          units: 1
unique values: 2      missing .: 67/4168
unique mv codes: 7    missing .*: 2071/4168

```

| tabulation: | Freq. | Numeric | Label |
|-------------|-------|---------|-------|
|             | 2029  | 0       | 0. No |

```

      1      1  1. Yes
      67      .
     214    .a  .a. FP Client: see section 500
     985    .b  .b. Not using a method: 805 = 0
     110    .e  .e. Programming skip error: Most
              males who answered 804 were
              skipped out of 805-807
           5    .m .m. Missing
           2    .s .s. Skipped by participant
          755    .x .x. No 6 month survey

```

-----  
m6\_807c

807: FP: Method: Pill  
-----

```

      type: numeric (byte)
      label: m6_807c

      range: [0,1]                units: 1
      unique values: 2             missing .: 67/4168
      unique mv codes: 7          missing .*: 2071/4168

```

```

      tabulation: Freq.  Numeric  Label
                  1880      0      0. No
                  150      1      1. Yes
                   67      .
                  214    .a  .a. FP Client: see section 500
                  985    .b  .b. Not using a method: 805 = 0
                  110    .e  .e. Programming skip error: Most
                          males who answered 804 were
                          skipped out of 805-807
                   5    .m  .m. Missing
                   2    .s  .s. Skipped by participant
                  755    .x  .x. No 6 month survey

```

-----  
m6\_807d

807: FP: Method: IUD  
-----

```

      type: numeric (byte)
      label: m6_807d

      range: [0,1]                units: 1
      unique values: 2             missing .: 67/4168
      unique mv codes: 7          missing .*: 2071/4168

```

```

      tabulation: Freq.  Numeric  Label
                  1890      0      0. No
                  140      1      1. Yes
                   67      .
                  214    .a  .a. FP Client: see section 500
                  985    .b  .b. Not using a method: 805 = 0
                  110    .e  .e. Programming skip error: Most
                          males who answered 804 were
                          skipped out of 805-807
                   5    .m  .m. Missing
                   2    .s  .s. Skipped by participant
                  755    .x  .x. No 6 month survey

```

-----  
m6\_807e

807: FP: Method: Injectables  
-----

```

      type: numeric (byte)
      label: m6_807e

      range: [0,1]                units: 1
      unique values: 2             missing .: 67/4168
      unique mv codes: 7          missing .*: 2071/4168

```



```

tabulation: Freq.  Numeric  Label
            1844      0  0. No
            186       1  1. Yes
             67       .
            214      .a  .a. FP Client: see section 500
            985      .b  .b. Not using a method: 805 = 0
            110      .e  .e. Programming skip error: Most
                    males who answered 804 were
                    skipped out of 805-807
                 5      .m  .m. Missing
                 2      .s  .s. Skipped by participant
            755      .x  .x. No 6 month survey

```

-----  
m6\_807f

807: FP: Method: Implants  
-----

```

type: numeric (byte)
label: m6_807f

```

```

range: [0,1]                units: 1
unique values: 2            missing .: 67/4168
unique mv codes: 7         missing .*: 2071/4168

```

```

tabulation: Freq.  Numeric  Label
            1247      0  0. No
            783       1  1. Yes
             67       .
            214      .a  .a. FP Client: see section 500
            985      .b  .b. Not using a method: 805 = 0
            110      .e  .e. Programming skip error: Most
                    males who answered 804 were
                    skipped out of 805-807
                 5      .m  .m. Missing
                 2      .s  .s. Skipped by participant
            755      .x  .x. No 6 month survey

```

-----  
m6\_807g

807: FP: Method: Male condom  
-----

```

type: numeric (byte)
label: m6_807g

```

```

range: [0,1]                units: 1
unique values: 2            missing .: 67/4168
unique mv codes: 7         missing .*: 2071/4168

```

```

tabulation: Freq.  Numeric  Label
            1225      0  0. No
            805       1  1. Yes
             67       .
            214      .a  .a. FP Client: see section 500
            985      .b  .b. Not using a method: 805 = 0
            110      .e  .e. Programming skip error: Most
                    males who answered 804 were
                    skipped out of 805-807
                 5      .m  .m. Missing
                 2      .s  .s. Skipped by participant
            755      .x  .x. No 6 month survey

```

-----  
m6\_807h

807: FP: Method: Female condom  
-----

```

type: numeric (byte)
label: m6_807h

```

```

range: [0,1]                units: 1
unique values: 2            missing .: 67/4168

```

unique mv codes: 7 missing .\*: 2071/4168

| tabulation: | Freq. | Numeric | Label                                                                               |
|-------------|-------|---------|-------------------------------------------------------------------------------------|
|             | 1988  | 0       | 0. No                                                                               |
|             | 42    | 1       | 1. Yes                                                                              |
|             | 67    | .       | .                                                                                   |
|             | 214   | .a      | .a. FP Client: see section 500                                                      |
|             | 985   | .b      | .b. Not using a method: 805 = 0                                                     |
|             | 110   | .e      | .e. Programming skip error: Most males who answered 804 were skipped out of 805-807 |
|             | 5     | .m      | .m. Missing                                                                         |
|             | 2     | .s      | .s. Skipped by participant                                                          |
|             | 755   | .x      | .x. No 6 month survey                                                               |

m6\_807i

807: FP: Method: Diaphragm

type: numeric (byte)  
label: m6\_807i

range: [0,1] units: 1  
unique values: 2 missing .: 67/4168  
unique mv codes: 7 missing .\*: 2071/4168

| tabulation: | Freq. | Numeric | Label                                                                               |
|-------------|-------|---------|-------------------------------------------------------------------------------------|
|             | 2025  | 0       | 0. No                                                                               |
|             | 5     | 1       | 1. Yes                                                                              |
|             | 67    | .       | .                                                                                   |
|             | 214   | .a      | .a. FP Client: see section 500                                                      |
|             | 985   | .b      | .b. Not using a method: 805 = 0                                                     |
|             | 110   | .e      | .e. Programming skip error: Most males who answered 804 were skipped out of 805-807 |
|             | 5     | .m      | .m. Missing                                                                         |
|             | 2     | .s      | .s. Skipped by participant                                                          |
|             | 755   | .x      | .x. No 6 month survey                                                               |

m6\_807j

807: FP: Method: Foam/Jelly

type: numeric (byte)  
label: m6\_807j

range: [0,0] units: 1  
unique values: 1 missing .: 67/4168  
unique mv codes: 7 missing .\*: 2071/4168

| tabulation: | Freq. | Numeric | Label                                                                               |
|-------------|-------|---------|-------------------------------------------------------------------------------------|
|             | 2030  | 0       | 0. No                                                                               |
|             | 67    | .       | .                                                                                   |
|             | 214   | .a      | .a. FP Client: see section 500                                                      |
|             | 985   | .b      | .b. Not using a method: 805 = 0                                                     |
|             | 110   | .e      | .e. Programming skip error: Most males who answered 804 were skipped out of 805-807 |
|             | 5     | .m      | .m. Missing                                                                         |
|             | 2     | .s      | .s. Skipped by participant                                                          |
|             | 755   | .x      | .x. No 6 month survey                                                               |

m6\_807k

807: FP: Method: Lactational amenorrhea method

type: numeric (byte)  
label: m6\_807k

range: [0,1] units: 1

unique values: 2 missing .: 67/4168  
unique mv codes: 7 missing .\*: 2071/4168

| tabulation: | Freq. | Numeric | Label                                                                               |
|-------------|-------|---------|-------------------------------------------------------------------------------------|
|             | 2029  | 0       | 0. No                                                                               |
|             | 1     | 1       | 1. Yes                                                                              |
|             | 67    | .       | .                                                                                   |
|             | 214   | .a      | .a. FP Client: see section 500                                                      |
|             | 985   | .b      | .b. Not using a method: 805 = 0                                                     |
|             | 110   | .e      | .e. Programming skip error: Most males who answered 804 were skipped out of 805-807 |
|             | 5     | .m      | .m. Missing                                                                         |
|             | 2     | .s      | .s. Skipped by participant                                                          |
|             | 755   | .x      | .x. No 6 month survey                                                               |

-----  
m6\_807l 807: FP: Method: Rhythm method  
-----

type: numeric (byte)  
label: m6\_807l

range: [0,1] units: 1  
unique values: 2 missing .: 67/4168  
unique mv codes: 7 missing .\*: 2071/4168

| tabulation: | Freq. | Numeric | Label                                                                               |
|-------------|-------|---------|-------------------------------------------------------------------------------------|
|             | 1989  | 0       | 0. No                                                                               |
|             | 41    | 1       | 1. Yes                                                                              |
|             | 67    | .       | .                                                                                   |
|             | 214   | .a      | .a. FP Client: see section 500                                                      |
|             | 985   | .b      | .b. Not using a method: 805 = 0                                                     |
|             | 110   | .e      | .e. Programming skip error: Most males who answered 804 were skipped out of 805-807 |
|             | 5     | .m      | .m. Missing                                                                         |
|             | 2     | .s      | .s. Skipped by participant                                                          |
|             | 755   | .x      | .x. No 6 month survey                                                               |

-----  
m6\_807m 807: FP: Method: Withdrawal  
-----

type: numeric (byte)  
label: m6\_807m

range: [0,1] units: 1  
unique values: 2 missing .: 67/4168  
unique mv codes: 7 missing .\*: 2071/4168

| tabulation: | Freq. | Numeric | Label                                                                               |
|-------------|-------|---------|-------------------------------------------------------------------------------------|
|             | 1987  | 0       | 0. No                                                                               |
|             | 43    | 1       | 1. Yes                                                                              |
|             | 67    | .       | .                                                                                   |
|             | 214   | .a      | .a. FP Client: see section 500                                                      |
|             | 985   | .b      | .b. Not using a method: 805 = 0                                                     |
|             | 110   | .e      | .e. Programming skip error: Most males who answered 804 were skipped out of 805-807 |
|             | 5     | .m      | .m. Missing                                                                         |
|             | 2     | .s      | .s. Skipped by participant                                                          |
|             | 755   | .x      | .x. No 6 month survey                                                               |

-----  
m6\_807n 807: FP: Method: Other method  
-----

type: numeric (byte)  
label: m6\_807n

range: [0,1] units: 1  
 unique values: 2 missing .: 67/4168  
 unique mv codes: 7 missing .\*: 2071/4168

| tabulation: | Freq. | Numeric | Label                                                                               |
|-------------|-------|---------|-------------------------------------------------------------------------------------|
|             | 2010  | 0       | 0. No                                                                               |
|             | 20    | 1       | 1. Yes                                                                              |
|             | 67    | .       | .                                                                                   |
|             | 214   | .a      | .a. FP Client: see section 500                                                      |
|             | 985   | .b      | .b. Not using a method: 805 = 0                                                     |
|             | 110   | .e      | .e. Programming skip error: Most males who answered 804 were skipped out of 805-807 |
|             | 5     | .m      | .m. Missing                                                                         |
|             | 2     | .s      | .s. Skipped by participant                                                          |
|             | 755   | .x      | .x. No 6 month survey                                                               |

-----  
 m6\_902

902: Last time had sexual intercourse  
 -----

type: numeric (byte)  
 label: m6\_902

range: [0,4] units: 1  
 unique values: 5 missing .: 67/4168  
 unique mv codes: 4 missing .\*: 772/4168

| tabulation: | Freq. | Numeric | Label                      |
|-------------|-------|---------|----------------------------|
|             | 336   | 0       | 0. Never had sex           |
|             | 1207  | 1       | 1. Today/Days ago          |
|             | 822   | 2       | 2. More than a week ago    |
|             | 766   | 3       | 3. More than a month ago   |
|             | 198   | 4       | 4. More than a year ago    |
|             | 67    | .       | .                          |
|             | 6     | .m      | .m. Missing                |
|             | 11    | .s      | .s. Skipped by participant |
|             | 755   | .x      | .x. No 6 month survey      |

-----  
 m6\_903

903: Times had sex in last week  
 -----

type: numeric (byte)  
 label: m6\_903, but 12 nonmissing values are not labeled

range: [0,88] units: 1  
 unique values: 12 missing .: 67/4168  
 unique mv codes: 6 missing .\*: 2887/4168

| tabulation: | Freq. | Numeric | Label                      |
|-------------|-------|---------|----------------------------|
|             | 64    | 0       |                            |
|             | 296   | 1       |                            |
|             | 313   | 2       |                            |
|             | 249   | 3       |                            |
|             | 101   | 4       |                            |
|             | 31    | 5       |                            |
|             | 38    | 6       |                            |
|             | 24    | 7       |                            |
|             | 16    | 8       |                            |
|             | 6     | 9       |                            |
|             | 1     | 10      |                            |
|             | 75    | 88      |                            |
|             | 67    | .       | .                          |
|             | 336   | .a      | .a. Never had sex          |
|             | 1786  | .b      | .b. Sex >1 week ago        |
|             | 6     | .m      | .m. Missing                |
|             | 4     | .s      | .s. Skipped by participant |
|             | 755   | .x      | .x. No 6 month survey      |

m6\_904

904: Times used condom when had sex in last week

type: numeric (byte)  
label: m6\_904, but 11 nonmissing values are not labeled

range: [0,88] units: 1  
unique values: 11 missing .: 67/4168  
unique mv codes: 6 missing .\*: 2884/4168

| tabulation: | Freq. | Numeric | Label                      |
|-------------|-------|---------|----------------------------|
|             | 565   | 0       |                            |
|             | 201   | 1       |                            |
|             | 158   | 2       |                            |
|             | 94    | 3       |                            |
|             | 39    | 4       |                            |
|             | 16    | 5       |                            |
|             | 14    | 6       |                            |
|             | 8     | 7       |                            |
|             | 16    | 8       |                            |
|             | 1     | 9       |                            |
|             | 105   | 88      |                            |
|             | 67    | .       |                            |
|             | 336   | .a      | .a. Never had sex          |
|             | 1786  | .b      | .b. Sex >1 week ago        |
|             | 6     | .m      | .m. Missing                |
|             | 1     | .s      | .s. Skipped by participant |
|             | 755   | .x      | .x. No 6 month survey      |

m6\_905

905: Relationship to LAST person with whom had sexual intercourse

type: numeric (byte)  
label: m6\_905

range: [1,6] units: 1  
unique values: 6 missing .: 67/4168  
unique mv codes: 5 missing .\*: 1295/4168

| tabulation: | Freq. | Numeric | Label                                       |
|-------------|-------|---------|---------------------------------------------|
|             | 1460  | 1       | 1. Husband/wife                             |
|             | 316   | 2       | 2. Live-in partner                          |
|             | 886   | 3       | 3. Girlfriend/boyfriend not living with you |
|             | 50    | 4       | 4. Person you paid or who paid you for sex  |
|             | 68    | 5       | 5. Casual acquaintance                      |
|             | 26    | 6       | 6. Other                                    |
|             | 67    | .       |                                             |
|             | 336   | .a      | .a. Never had sex                           |
|             | 198   | .b      | .b. Sex >1 year ago                         |
|             | 6     | .m      | .m. Missing                                 |
|             | 755   | .x      | .x. No 6 month survey                       |

m6\_906

906: Condom used last time had sex

type: numeric (byte)  
label: m6\_906

range: [0,88] units: 1  
unique values: 3 missing .: 67/4168  
unique mv codes: 5 missing .\*: 1295/4168

| tabulation: | Freq. | Numeric | Label |
|-------------|-------|---------|-------|
|             | 1566  | 0       | 0. No |

```

1198      1  1. Yes
  42     88 88. Don't Know
  67      .
 336     .a .a. Never had sex
 198     .b .b. Sex >1 year ago
   6     .m .m. Missing
 755     .x .x. No 6 month survey

```

-----  
m6\_907                    907: Use condom every time had sex with LAST person in last 12 months  
-----

```

      type: numeric (byte)
      label: m6_907

      range: [0,88]                    units: 1
unique values: 3                    missing .: 67/4168
unique mv codes: 6                   missing .*: 1296/4168

```

```

tabulation: Freq.    Numeric    Label
            1728       0    0. No
            1016       1    1. Yes
              61       88   88. Don't Know
              67       .
            336       .a   .a. Never had sex
            198       .b   .b. Sex >1 year ago
               6       .m   .m. Missing
               1       .s   .s. Skipped by participant
            755       .x   .x. No 6 month survey

```

-----  
m6\_908                    908: Having sex with other people during time having sex with LAST person  
-----

```

      type: numeric (byte)
      label: m6_908

      range: [0,88]                    units: 1
unique values: 3                    missing .: 67/4168
unique mv codes: 5                   missing .*: 1295/4168

```

```

tabulation: Freq.    Numeric    Label
            2248       0    0. No
             500       1    1. Yes
              58       88   88. Don't Know
              67       .
            336       .a   .a. Never had sex
            198       .b   .b. Sex >1 year ago
               6       .m   .m. Missing
            755       .x   .x. No 6 month survey

```

-----  
m6\_911                    911: Number new sexual partners in last 6 months  
-----

```

      type: numeric (byte)
      label: m6_911, but 11 nonmissing values are not labeled

      range: [0,10]                    units: 1
unique values: 11                    missing .: 67/4168
unique mv codes: 7                   missing .*: 1303/4168

```

```

tabulation: Freq.    Numeric    Label
            1332       0
            1013       1
             265       2
             107       3
              39       4
              12       5
              15       6

```

```

4      7
3      8
6      9
2     10
67     .
335    .a .a. Never had sex
198    .b .b. Sex >1 year ago
6      .m .m. Missing
7      .s .s. Skipped by participant
2      .w .w. Answered 6 wk survey at 6
        mon visit
755    .x .x. No 6 month survey

```

```
-----
m6_currpart_an                                Analysis: Currently has spouse/primary sex partner
-----
```

```

      type: numeric (byte)
      label: m6_yesno

      range: [0,1]                                units: 1
      unique values: 2                            missing .: 67/4168
      unique mv codes: 2                          missing .*: 758/4168

      tabulation: Freq.  Numeric  Label
                  519      0      0. No
                  2824     1      1. Yes
                   67      .
                  758     .m     .m. Missing

```

```
-----
ch_Site                                        CHAMP: Site
-----
```

```

      type: string (str40)

      unique values: 10                            missing "": 2644/4168

      tabulation: Freq.  Value
                  2644   ""
                   97   "99: Missing from CHAMP database"
                  278   "Chawama Clinic - Maternity Ward"
                   4   "Chawama Clinic - Out Patient Ward
                        (VMMC)"
                   3   "Chipata Gen Hosp - OP VMMC"
                  132   "Kamwala Clinic - TB, STI & HIV Clinic"
                  257   "Kapata Urban Clinic, MCH"
                  350   "Kapata Urban Clinic, TB, STI & HIV"
                  150   "SFH HCT - Cairo Road"
                  252   "SFH New Start"
                   1   "SFH VMMC"

      warning: variable has embedded blanks

```

```
-----
ch_Gender                                        CHAMP: Gender
-----
```

```

      type: numeric (byte)

      range: [0,1]                                units: 1
      unique values: 2                            missing .: 1141/4168
      unique mv codes: 3                          missing .*: 1524/4168

      tabulation: Freq.  Value
                  479      0
                  1024     1
                  1141     .
                   205     .j
                  1319     .k

```

-----  
ch\_Referrals

CHAMP: Referral  
-----

type: string (str244)  
unique values: 942 missing "": 2644/4168  
examples: ""  
""  
""  
"Referred for : CCS: CERVICAL CANCER SCREENING on May  
8 2014 to Chawama Clinic - Maternity WardReferred  
for : HIV: HTC - COUPLES on May 8 2014 to Chawama  
Clinic - Out Patient Ward (VMMC)"  
warning: variable has embedded and trailing blanks

-----  
ch\_Visit

CHAMP: Visit notes  
-----

type: string (str48)  
unique values: 3 missing "": 2644/4168  
tabulation: Freq. Value  
2644 ""  
1422 "No visit recorded at any site for this  
service"  
101 "99: Missing from CHAMP database"  
1 "Client had no number "  
warning: variable has leading, embedded, and trailing blanks

-----  
ch\_Result

CHAMP: Result code  
-----

type: numeric (byte)  
label: ch\_Result  
range: [1,5] units: 1  
unique values: 5 missing .: 1141/4168  
unique mv codes: 3 missing .\*: 1524/4168  
tabulation: Freq. Numeric Label  
661 1 1. Successful  
404 2 2. Unsuccessful  
210 3 3. Computer didn't generate  
143 4 4. Omitted  
85 5 5. Client had no number  
1141 .  
205 .j .j. Ineligible: External site  
client  
1319 .k .k. Ineligible: SOC arm

-----  
ch\_RefDate

CHAMP: Referral date  
-----

type: numeric daily date (int)  
range: [19711,20037] units: 1  
or equivalently: [19dec2013,10nov2014] units: days  
unique values: 210 missing .: 1218/4168  
unique mv codes: 3 missing .\*: 1524/4168  
mean: 19864.3 = 21may2014 (+ 8 hours)



std. dev: 72.5984

| percentiles: | 10%       | 25%       | 50%       | 75%       | 90%       |
|--------------|-----------|-----------|-----------|-----------|-----------|
|              | 19774     | 19807     | 19859     | 19919     | 19969     |
|              | 20feb2014 | 25mar2014 | 16may2014 | 15jul2014 | 03sep2014 |

```
.  
.br/>end of do-file  
  
.br/>.br/>end of do-file  
  
. do "C:\Users\JDIGIT~1\AppData\Local\Temp\STD0f000000.tmp"  
  
. *** INPUT: REach_StudyData  
. *** OUTPUT: REach_AnalysisData  
. *** CREATED: 1 MAY 2015  
. *** UPDATED: 19 OCT 2015  
. *** AUTHORS: JD, PH  
  
. *** SETTINGS AND PATHS  
. clear  
  
. clear matrix  
  
. clear mata  
  
. set more off  
  
. set maxvar 25000  
  
. set matsize 800  
  
. getcurrdate /* PERSONAL ADO - GETS DATE FORMATS */  
  
Format of currdate1 is 28Oct2015  
Format of currdate2 is 2015-10-28  
Format of currdate3 is 10-28-2015  
  
.br/>. capture log close
```
